# Supplementary material for: Microbiome and volatile organic compound profiling of diseased soils and their association with tomato wilt caused by Ralstonia solanacearum
Source: Research Square preprint supplement (doi:10.21203/rs.3.rs-8281057/v1), 2025-12-10
Supplement: Supplementary file 1 [file 7aa4761203dae4b72dda9ece.xlsx]

## Sheet: Table S1 bac_ASV 
Table S1 Sequencing results of 16s amplicon of soil bacteria
Bacterial_sampleID	GX3_1	GX3_2	GX3_3	GX3_4	JS3_1	JS3_2	JS3_3	JS3_4	taxonomy
ASV1	0	106	184	0	0	140	106	67	d__Bacteria; p__Proteobacteria; c__Gammaproteobacteria; o__Xanthomonadales; f__Rhodanobacteraceae; g__Chujaibacter; s__uncultured gamma proteobacterium
ASV2	11	21	70	12	65	76	59	104	d__Bacteria; p__Proteobacteria; c__Gammaproteobacteria; o__Xanthomonadales; f__Rhodanobacteraceae; g__Chujaibacter; s__uncultured bacterium
ASV3	334	499	258	464	142	682	114	0	d__Bacteria; p__Bacteroidota; c__Bacteroidia; o__Chitinophagales; f__Chitinophagaceae; g__Vibrionimonas
ASV4	0	0	0	0	0	62	68	37	d__Bacteria; p__Proteobacteria; c__Gammaproteobacteria; o__Xanthomonadales; f__Rhodanobacteraceae; g__Chujaibacter; s__uncultured bacterium
ASV5	0	0	0	0	0	174	0	0	d__Bacteria; p__Proteobacteria; c__Gammaproteobacteria; o__Xanthomonadales; f__Rhodanobacteraceae
ASV6	321	476	201	208	0	0	0	0	d__Bacteria; p__Proteobacteria; c__Gammaproteobacteria
ASV7	400	445	439	270	53	144	40	42	d__Bacteria; p__Proteobacteria; c__Alphaproteobacteria; o__Sphingomonadales; f__Sphingomonadaceae; g__Sphingomonas; s__uncultured Sphingomonas sp.
ASV8	107	242	210	266	95	139	133	96	d__Bacteria; p__Firmicutes; c__Bacilli; o__Bacillales; f__Bacillaceae; g__Bacillus
ASV9	0	0	0	0	0	0	0	13	d__Bacteria; p__Proteobacteria; c__Gammaproteobacteria; o__Xanthomonadales; f__Rhodanobacteraceae; g__Chujaibacter; s__uncultured Xanthomonadaceae bacterium
ASV10	0	0	0	0	14	388	40	23	d__Bacteria; p__Cyanobacteria; c__Cyanobacteriia; o__Cyanobacteriales
ASV11	120	224	141	142	31	93	50	55	d__Bacteria; p__Proteobacteria; c__Alphaproteobacteria; o__Rhizobiales; f__Xanthobacteraceae; g__Bradyrhizobium
ASV12	45	112	56	72	44	81	121	148	d__Bacteria; p__Actinobacteriota; c__Actinobacteria; o__Corynebacteriales; f__Mycobacteriaceae; g__Mycobacterium
ASV13	0	0	0	0	0	14	0	0	d__Bacteria; p__Proteobacteria; c__Gammaproteobacteria; o__Xanthomonadales; f__Rhodanobacteraceae; g__Luteibacter; s__uncultured bacterium
ASV14	74	113	128	97	0	0	0	0	d__Bacteria; p__Proteobacteria; c__Gammaproteobacteria; o__Xanthomonadales; f__Rhodanobacteraceae; g__Chujaibacter
ASV15	0	0	0	0	5	55	23	24	d__Bacteria; p__Proteobacteria; c__Gammaproteobacteria; o__Xanthomonadales; f__Rhodanobacteraceae; g__Mizugakiibacter; s__uncultured Xanthomonadaceae bacterium
ASV16	15	38	44	24	21	0	0	0	d__Bacteria; p__Proteobacteria; c__Gammaproteobacteria; o__Xanthomonadales; f__Rhodanobacteraceae; g__Chujaibacter; s__uncultured bacterium
ASV17	588	696	435	407	0	0	0	0	d__Bacteria; p__Firmicutes; c__Bacilli; o__Caldalkalibacillales; f__Caldalkalibacillaceae; g__Caldalkalibacillus
ASV18	786	901	276	292	0	0	0	0	Unclassified
ASV19	46	133	52	70	27	102	43	94	d__Bacteria; p__Proteobacteria; c__Alphaproteobacteria; o__Rhizobiales; f__Beijerinckiaceae; g__Methylovirgula; s__uncultured bacterium
ASV20	66	151	90	97	35	155	19	7	d__Bacteria; p__Proteobacteria; c__Gammaproteobacteria; o__Burkholderiales; f__Comamonadaceae; g__Variovorax; s__Variovorax paradoxus
ASV21	1118	506	456	580	0	0	0	0	d__Bacteria; p__Acidobacteriota; c__Acidobacteriae; o__Acidobacteriales; f__Acidobacteriaceae (Subgroup 1); g__uncultured
ASV22	234	244	223	159	8	77	56	21	d__Bacteria; p__Actinobacteriota; c__Actinobacteria; o__Micrococcales; f__Micrococcaceae; g__Pseudarthrobacter
ASV23	0	0	0	0	0	69	0	0	d__Bacteria; p__Proteobacteria; c__Alphaproteobacteria; o__Sphingomonadales; f__Sphingomonadaceae; g__Sphingomonas
ASV24	0	0	9	0	0	19	16	22	d__Bacteria; p__Proteobacteria; c__Gammaproteobacteria; o__Burkholderiales; f__Nitrosomonadaceae; g__Nitrosospira
ASV25	0	45	54	32	0	231	21	0	d__Bacteria; p__Proteobacteria; c__Gammaproteobacteria; o__Xanthomonadales; f__Rhodanobacteraceae; g__Rhodanobacter
ASV26	28	44	25	24	20	46	0	10	d__Bacteria; p__Firmicutes; c__Bacilli; o__Bacillales; f__Bacillaceae; g__Bacillus
ASV27	24	0	43	0	0	0	0	0	d__Bacteria; p__Proteobacteria; c__Gammaproteobacteria; o__Xanthomonadales; f__Rhodanobacteraceae; g__Chujaibacter
ASV28	0	0	0	0	0	17	0	0	d__Bacteria; p__Cyanobacteria; c__Cyanobacteriia; o__Cyanobacteriales
ASV29	39	70	77	51	17	41	16	6	d__Bacteria; p__Actinobacteriota; c__Thermoleophilia; o__Gaiellales; f__Gaiellaceae; g__Gaiella; s__uncultured bacterium
ASV30	38	18	0	29	0	0	0	0	d__Bacteria; p__Verrucomicrobiota; c__Verrucomicrobiae; o__Chthoniobacterales; f__Chthoniobacteraceae; g__Candidatus Udaeobacter; s__uncultured bacterium
ASV31	32	0	94	222	7	3	0	0	d__Bacteria; p__Cyanobacteria; c__Cyanobacteriia; o__Cyanobacteriales
ASV32	77	105	116	66	50	0	119	35	d__Bacteria; p__Proteobacteria; c__Alphaproteobacteria; o__Sphingomonadales; f__Sphingomonadaceae; g__Sphingomonas; s__uncultured bacterium
ASV33	0	0	0	0	972	339	392	767	d__Bacteria; p__Acidobacteriota; c__Blastocatellia; o__Pyrinomonadales; f__Pyrinomonadaceae; g__RB41; s__uncultured bacterium
ASV34	0	0	0	0	12	0	43	67	d__Bacteria; p__Proteobacteria; c__Gammaproteobacteria; o__Xanthomonadales; f__Rhodanobacteraceae; g__Dyella
ASV35	11	0	4	10	0	0	6	0	d__Bacteria; p__Chloroflexi; c__Anaerolineae; o__Anaerolineales; f__Anaerolineaceae; g__uncultured; s__uncultured bacterium
ASV36	0	0	4	0	0	0	5	5	d__Bacteria; p__Proteobacteria; c__Gammaproteobacteria; o__Burkholderiales; f__Alcaligenaceae
ASV37	46	144	39	42	26	79	103	0	d__Bacteria; p__Proteobacteria; c__Alphaproteobacteria; o__Rhizobiales; f__Rhizobiaceae; g__Mesorhizobium; s__uncultured bacterium
ASV38	0	0	0	0	29	80	22	0	d__Bacteria; p__Proteobacteria; c__Gammaproteobacteria; o__Xanthomonadales; f__Xanthomonadaceae; g__Luteimonas
ASV39	0	0	0	0	72	174	69	52	d__Bacteria; p__Proteobacteria; c__Alphaproteobacteria; o__Sphingomonadales; f__Sphingomonadaceae; g__Sphingomonas
ASV40	0	0	11	0	213	128	106	173	d__Bacteria
ASV41	0	0	0	0	0	61	26	19	d__Bacteria; p__Gemmatimonadota; c__Gemmatimonadetes; o__Gemmatimonadales; f__Gemmatimonadaceae; g__uncultured
ASV42	0	0	11	0	0	15	0	0	Unclassified
ASV43	215	279	64	327	0	0	0	0	Unclassified
ASV44	0	7	0	6	0	0	0	0	d__Bacteria; p__Bacteroidota; c__Bacteroidia; o__Chitinophagales; f__Chitinophagaceae; g__uncultured; s__uncultured bacterium
ASV45	0	0	0	0	0	35	0	0	d__Bacteria; p__Proteobacteria; c__Gammaproteobacteria; o__Xanthomonadales; f__Rhodanobacteraceae; g__Rhodanobacter
ASV46	0	0	0	0	99	127	107	54	d__Bacteria; p__Actinobacteriota; c__Thermoleophilia; o__Gaiellales; f__Gaiellaceae; g__Gaiella
ASV47	8	0	21	0	141	98	83	97	d__Bacteria; p__Acidobacteriota; c__Vicinamibacteria; o__Vicinamibacterales; f__Vicinamibacteraceae; g__uncultured; s__uncultured Acidobacteria bacterium
ASV48	64	77	52	57	0	55	60	70	d__Bacteria; p__Proteobacteria; c__Gammaproteobacteria; o__Burkholderiales
ASV49	0	0	0	0	0	7	0	0	d__Bacteria; p__Proteobacteria; c__Gammaproteobacteria; o__Xanthomonadales; f__Xanthomonadaceae; g__Lysobacter; s__uncultured bacterium
ASV50	78	123	327	125	0	0	0	0	d__Bacteria; p__Proteobacteria; c__Gammaproteobacteria; o__Xanthomonadales; f__Rhodanobacteraceae; g__Dyella
ASV51	11	0	0	0	0	0	0	0	d__Bacteria; p__Proteobacteria; c__Gammaproteobacteria; o__Xanthomonadales; f__Rhodanobacteraceae; g__Chujaibacter; s__uncultured bacterium
ASV52	0	0	9	0	159	99	162	118	d__Bacteria; p__Acidobacteriota
ASV53	0	0	0	0	56	75	43	29	d__Bacteria; p__Chloroflexi; c__Anaerolineae; o__Anaerolineales; f__Anaerolineaceae; g__uncultured; s__uncultured Chloroflexi bacterium
ASV54	31	0	0	0	92	97	101	74	d__Bacteria; p__Proteobacteria; c__Gammaproteobacteria; o__Burkholderiales; f__Nitrosomonadaceae; g__MND1; s__uncultured bacterium
ASV55	0	0	0	0	0	15	12	4	d__Bacteria; p__Proteobacteria; c__Gammaproteobacteria; o__Pseudomonadales
ASV56	0	0	0	0	141	228	84	84	d__Bacteria; p__Proteobacteria; c__Alphaproteobacteria; o__Sphingomonadales; f__Sphingomonadaceae; g__Sphingomonas
ASV57	0	0	14	0	0	28	0	0	d__Bacteria; p__Proteobacteria; c__Gammaproteobacteria; o__Xanthomonadales; f__Rhodanobacteraceae; g__Dyella
ASV58	0	0	0	0	113	58	40	18	Unclassified
ASV59	0	0	0	0	0	6	0	4	d__Bacteria; p__Proteobacteria; c__Gammaproteobacteria; o__Ectothiorhodospirales; f__Thioalkalispiraceae; g__Thiohalophilus
ASV60	10	0	0	0	0	0	13	0	d__Bacteria; p__Bacteroidota; c__Bacteroidia; o__Chitinophagales; f__Chitinophagaceae; g__uncultured
ASV61	0	0	16	0	0	0	0	0	d__Bacteria; p__Acidobacteriota; c__Acidobacteriae; o__Acidobacteriales; f__Acidobacteriaceae (Subgroup 1); g__Acidipila-Silvibacterium; s__uncultured bacterium
ASV62	49	65	91	47	0	64	0	0	d__Bacteria; p__Actinobacteriota; c__Actinobacteria; o__Frankiales; f__Frankiaceae; g__Jatrophihabitans; s__uncultured bacterium
ASV63	0	0	0	0	50	96	30	50	d__Bacteria; p__Bacteroidota; c__Bacteroidia; o__Cytophagales; f__Microscillaceae; g__uncultured
ASV64	0	0	0	0	0	18	0	0	d__Bacteria; p__Bacteroidota; c__Bacteroidia; o__Chitinophagales; f__Chitinophagaceae; g__uncultured; s__uncultured bacterium
ASV65	344	197	243	317	0	0	0	0	d__Bacteria; p__Chloroflexi; c__Ktedonobacteria; o__Ktedonobacterales; f__Ktedonobacteraceae; g__HSB OF53-F07
ASV66	59	0	65	44	0	0	0	0	d__Bacteria; p__Proteobacteria; c__Alphaproteobacteria; o__Rhizobiales; f__Xanthobacteraceae; g__Bradyrhizobium; s__Bradyrhizobium japonicum
ASV67	0	0	0	0	175	172	109	123	d__Bacteria; p__Proteobacteria; c__Gammaproteobacteria; o__Xanthomonadales; f__Xanthomonadaceae; g__Lysobacter
ASV68	0	0	0	0	67	109	64	39	d__Bacteria; p__Proteobacteria; c__Alphaproteobacteria; o__Sphingomonadales; f__Sphingomonadaceae; g__Sphingomonas; s__uncultured bacterium
ASV69	0	0	0	0	12	79	0	0	d__Bacteria; p__Proteobacteria; c__Gammaproteobacteria; o__Xanthomonadales; f__Rhodanobacteraceae; g__Rhodanobacter
ASV70	0	0	0	0	655	272	424	318	d__Bacteria; p__Acidobacteriota; c__Blastocatellia; o__Pyrinomonadales; f__Pyrinomonadaceae; g__RB41; s__uncultured Acidobacteria bacterium
ASV71	9	0	0	0	0	0	0	0	d__Bacteria; p__Proteobacteria; c__Gammaproteobacteria; o__Xanthomonadales; f__Rhodanobacteraceae; g__Luteibacter; s__uncultured bacterium
ASV72	0	0	94	33	0	0	0	0	d__Bacteria; p__Proteobacteria; c__Gammaproteobacteria; o__Xanthomonadales; f__Rhodanobacteraceae; g__Dyella
ASV73	0	0	0	0	0	4	0	0	d__Bacteria; p__Proteobacteria; c__Alphaproteobacteria; o__Sphingomonadales; f__Sphingomonadaceae; g__Erythrobacter; s__uncultured bacterium
ASV74	244	245	160	185	0	0	0	0	d__Bacteria; p__Firmicutes; c__Bacilli; o__Caldalkalibacillales; f__Caldalkalibacillaceae; g__Caldalkalibacillus
ASV75	25	36	24	47	13	70	13	0	d__Bacteria; p__Bacteroidota; c__Bacteroidia; o__Chitinophagales; f__Chitinophagaceae; g__Asinibacterium; s__uncultured bacterium
ASV76	0	33	41	0	52	61	83	52	d__Bacteria; p__Proteobacteria; c__Alphaproteobacteria; o__Sphingomonadales; f__Sphingomonadaceae; g__Sphingomonas; s__uncultured Sphingomonas sp.
ASV77	41	44	83	64	0	20	0	0	d__Bacteria; p__Bacteroidota; c__Bacteroidia; o__Chitinophagales; f__Chitinophagaceae; g__uncultured
ASV78	97	145	105	130	0	0	0	0	d__Bacteria; p__Proteobacteria; c__Gammaproteobacteria; o__Burkholderiales; f__Burkholderiaceae; g__Burkholderia-Caballeronia-Paraburkholderia; s__uncultured bacterium
ASV79	0	0	17	0	0	0	0	0	d__Bacteria; p__Proteobacteria; c__Gammaproteobacteria; o__Xanthomonadales; f__Rhodanobacteraceae; g__Chujaibacter; s__uncultured bacterium
ASV80	9	0	0	0	411	130	166	193	d__Bacteria; p__Acidobacteriota; c__Blastocatellia; o__Pyrinomonadales; f__Pyrinomonadaceae; g__RB41; s__uncultured bacterium
ASV81	0	3	0	0	9	43	10	0	d__Bacteria; p__Proteobacteria; c__Gammaproteobacteria; o__Burkholderiales; f__Methylophilaceae; g__UBA6140; s__uncultured bacterium
ASV82	0	0	0	0	374	210	176	224	d__Bacteria; p__Acidobacteriota; c__Blastocatellia; o__Pyrinomonadales; f__Pyrinomonadaceae; g__RB41; s__uncultured bacterium
ASV83	36	57	49	54	76	56	31	36	d__Bacteria; p__Nitrospirota; c__Nitrospiria; o__Nitrospirales; f__Nitrospiraceae; g__Nitrospira
ASV84	0	0	0	0	72	119	76	91	d__Bacteria; p__Proteobacteria; c__Alphaproteobacteria; o__Rhizobiales; f__Methyloligellaceae; g__uncultured; s__metagenome
ASV85	31	83	15	18	55	46	60	34	d__Bacteria; p__Acidobacteriota
ASV86	0	0	0	0	9	31	13	18	d__Bacteria; p__Firmicutes; c__Bacilli; o__Bacillales; f__Sporolactobacillaceae; g__Pullulanibacillus
ASV87	6	16	4	5	0	0	0	0	d__Bacteria; p__Firmicutes; c__Bacilli; o__Lactobacillales; f__Enterococcaceae; g__Enterococcus
ASV88	152	141	180	183	0	0	0	0	d__Bacteria; p__Proteobacteria; c__Gammaproteobacteria; o__Xanthomonadales; f__Rhodanobacteraceae; g__Frateuria; s__Frateuria terrea
ASV89	0	0	0	0	107	39	79	65	Unclassified
ASV90	0	0	0	0	59	103	60	0	d__Bacteria; p__Proteobacteria; c__Alphaproteobacteria; o__Rhizobiales; f__Xanthobacteraceae; g__Pseudolabrys; s__uncultured bacterium
ASV91	0	0	0	0	110	66	0	0	d__Bacteria; p__Acidobacteriota; c__Vicinamibacteria; o__Vicinamibacterales; f__Vicinamibacteraceae; g__uncultured; s__uncultured Acidobacteria bacterium
ASV92	359	385	102	255	0	0	0	0	Unclassified
ASV93	59	58	48	41	0	0	0	0	d__Bacteria; p__Acidobacteriota; c__Acidobacteriae; o__Bryobacterales; f__Bryobacteraceae; g__Bryobacter; s__uncultured bacterium
ASV94	0	0	0	0	57	131	48	37	d__Bacteria; p__Proteobacteria; c__Alphaproteobacteria; o__Sphingomonadales; f__Sphingomonadaceae; g__Sphingomonas
ASV95	49	72	109	64	0	0	0	0	d__Bacteria; p__Proteobacteria; c__Alphaproteobacteria; o__Rhizobiales; f__Xanthobacteraceae; g__Pseudolabrys; s__uncultured bacterium
ASV96	0	0	0	0	72	77	75	70	d__Bacteria; p__Proteobacteria; c__Alphaproteobacteria; o__Rhizobiales; f__Xanthobacteraceae; g__uncultured; s__uncultured bacterium
ASV97	0	0	0	0	104	116	262	143	d__Bacteria; p__Proteobacteria; c__Gammaproteobacteria; o__Steroidobacterales; f__Steroidobacteraceae; g__uncultured; s__uncultured bacterium
ASV98	0	0	0	0	138	107	108	153	d__Bacteria; p__Acidobacteriota; c__Vicinamibacteria; o__Vicinamibacterales; f__Vicinamibacteraceae; g__uncultured
ASV99	0	0	0	0	0	20	0	0	d__Bacteria; p__Proteobacteria; c__Gammaproteobacteria; o__Pseudomonadales; f__Halomonadaceae; g__Halomonas
ASV100	0	0	0	0	83	64	222	90	d__Bacteria; p__Acidobacteriota
ASV101	47	61	100	78	0	0	0	0	d__Bacteria; p__Actinobacteriota; c__Actinobacteria; o__Micrococcales; f__Intrasporangiaceae
ASV102	19	37	69	47	0	0	0	0	d__Bacteria; p__Proteobacteria; c__Gammaproteobacteria; o__Burkholderiales; f__Alcaligenaceae; g__Bordetella; s__uncultured Bordetella sp.
ASV103	0	0	0	0	0	0	11	9	d__Bacteria; p__Acidobacteriota; c__Acidobacteriae; o__Acidobacteriales; f__Acidobacteriaceae (Subgroup 1); g__Acidipila-Silvibacterium; s__uncultured Acidobacteria bacterium
ASV104	36	96	43	78	0	0	0	0	Unclassified
ASV105	0	2	44	21	0	0	0	0	Unclassified
ASV106	0	0	0	0	276	113	29	27	d__Bacteria; p__Nitrospirota; c__Nitrospiria; o__Nitrospirales; f__Nitrospiraceae; g__Nitrospira
ASV107	0	0	21	0	50	117	119	57	d__Bacteria; p__Myxococcota; c__Myxococcia; o__Myxococcales; f__Myxococcaceae; g__Archangium
ASV108	0	0	0	0	376	88	167	123	d__Bacteria; p__Acidobacteriota; c__Vicinamibacteria; o__Vicinamibacterales; f__Vicinamibacteraceae; g__uncultured; s__uncultured bacterium
ASV109	0	0	38	27	0	0	0	0	d__Bacteria; p__Proteobacteria; c__Alphaproteobacteria; o__Sphingomonadales; f__Sphingomonadaceae; g__Sphingomonas; s__uncultured bacterium
ASV110	0	0	0	0	37	73	37	44	d__Bacteria; p__Actinobacteriota; c__Actinobacteria; o__Propionibacteriales; f__Nocardioidaceae; g__Nocardioides; s__uncultured bacterium
ASV111	19	54	27	39	0	0	0	0	d__Bacteria; p__Proteobacteria; c__Gammaproteobacteria; o__Xanthomonadales; f__Rhodanobacteraceae; g__Rhodanobacter
ASV112	213	81	79	104	0	0	0	0	d__Bacteria; p__Acidobacteriota; c__Acidobacteriae; o__Acidobacteriales; f__Acidobacteriaceae (Subgroup 1); g__uncultured; s__uncultured bacterium
ASV113	0	0	0	0	247	119	45	91	d__Bacteria; p__Chloroflexi; c__Anaerolineae; o__Anaerolineales; f__Anaerolineaceae; g__Thermanaerothrix
ASV114	232	246	158	179	0	0	0	0	Unclassified
ASV115	9	13	36	32	0	0	0	0	d__Bacteria; p__Bacteroidota; c__Bacteroidia; o__Chitinophagales; f__Chitinophagaceae; g__Arachidicoccus; s__Arachidicoccus sp. KIS59-12
ASV116	191	127	95	154	0	0	0	0	d__Bacteria; p__Acidobacteriota; c__Acidobacteriae; o__Acidobacteriales; f__Acidobacteriaceae (Subgroup 1); g__uncultured; s__uncultured Acidobacteria bacterium
ASV117	0	0	0	0	0	1	0	0	d__Bacteria; p__Cyanobacteria; c__Cyanobacteriia; o__Geitlerinematales; f__Geitlerinemataceae; g__Geitlerinema; s__Geitlerinema sp. PCC 7407
ASV118	0	0	0	0	46	52	46	70	d__Bacteria; p__Acidobacteriota; c__Thermoanaerobaculia; o__Thermoanaerobaculales; f__Thermoanaerobaculaceae; g__Subgroup 10; s__uncultured bacterium
ASV119	27	74	858	62	0	0	0	0	d__Bacteria; p__Proteobacteria; c__Alphaproteobacteria; o__Rhizobiales; f__Rhizobiaceae; g__Allorhizobium-Neorhizobium-Pararhizobium-Rhizobium
ASV120	0	0	0	0	112	40	0	0	d__Bacteria; p__Proteobacteria; c__Gammaproteobacteria; o__Burkholderiales; f__Nitrosomonadaceae; g__Nitrosospira
ASV121	0	0	0	0	0	0	30	0	d__Bacteria; p__Bacteroidota; c__Bacteroidia; o__Chitinophagales; f__Chitinophagaceae; g__uncultured; s__uncultured bacterium
ASV122	28	38	16	48	0	40	10	0	d__Bacteria; p__Proteobacteria; c__Alphaproteobacteria; o__Rhizobiales; f__Xanthobacteraceae; g__Afipia
ASV123	36	35	40	45	15	44	17	0	d__Bacteria; p__Actinobacteriota; c__Thermoleophilia; o__Gaiellales; f__Gaiellaceae; g__Gaiella; s__uncultured bacterium
ASV124	0	0	0	0	48	45	30	42	d__Bacteria; p__Actinobacteriota; c__Thermoleophilia; o__Gaiellales; f__Gaiellaceae; g__Gaiella; s__uncultured bacterium
ASV125	0	0	0	0	113	133	159	104	d__Bacteria
ASV126	0	0	0	0	44	63	69	41	d__Bacteria; p__Proteobacteria; c__Alphaproteobacteria; o__Rhizobiales; f__Methyloligellaceae; g__uncultured
ASV127	0	31	15	0	7	14	12	215	d__Bacteria; p__Proteobacteria; c__Gammaproteobacteria; o__Burkholderiales; f__Burkholderiaceae; g__Burkholderia-Caballeronia-Paraburkholderia
ASV128	154	103	90	291	0	0	0	0	d__Bacteria; p__Firmicutes; c__Bacilli; o__Alicyclobacillales; f__Alicyclobacillaceae; g__Tumebacillus; s__uncultured bacterium
ASV129	0	0	0	0	20	0	22	24	d__Bacteria; p__Gemmatimonadota; c__Gemmatimonadetes; o__Gemmatimonadales; f__Gemmatimonadaceae; g__uncultured; s__uncultured bacterium
ASV130	0	15	5	0	0	9	0	0	d__Bacteria; p__Proteobacteria; c__Gammaproteobacteria; o__Burkholderiales; f__Nitrosomonadaceae; g__Nitrosospira; s__Nitrosovibrio tenuis
ASV131	0	0	0	0	0	41	0	0	d__Bacteria; p__Proteobacteria; c__Gammaproteobacteria; o__Xanthomonadales; f__Rhodanobacteraceae; g__Rhodanobacter
ASV132	0	0	0	0	416	123	70	293	d__Bacteria; p__Acidobacteriota; c__Blastocatellia; o__Pyrinomonadales; f__Pyrinomonadaceae; g__RB41; s__uncultured bacterium
ASV133	0	0	0	0	161	153	178	123	d__Bacteria; p__Acidobacteriota; c__Vicinamibacteria; o__Vicinamibacterales; f__Vicinamibacteraceae; g__Luteitalea
ASV134	129	82	67	137	0	0	0	0	d__Bacteria; p__Acidobacteriota; c__Acidobacteriae; o__Acidobacteriales; f__Acidobacteriaceae (Subgroup 1); g__uncultured; s__uncultured bacterium
ASV135	53	71	118	131	0	0	0	0	d__Bacteria; p__Actinobacteriota; c__Actinobacteria; o__Micrococcales; f__Micrococcaceae; g__Sinomonas
ASV136	25	24	0	44	75	54	34	44	d__Bacteria; p__Bacteroidota; c__Bacteroidia; o__Chitinophagales; f__Chitinophagaceae; g__Flavisolibacter
ASV137	0	0	0	0	0	7	0	0	d__Bacteria; p__Proteobacteria; c__Alphaproteobacteria; o__Sphingomonadales; f__Sphingomonadaceae; g__uncultured; s__uncultured bacterium
ASV138	0	0	0	0	97	78	80	65	d__Bacteria; p__Proteobacteria; c__Gammaproteobacteria; o__Burkholderiales; f__Rhodocyclaceae; g__Sulfuritalea; s__uncultured bacterium
ASV139	161	165	114	67	0	0	0	0	d__Bacteria; p__Firmicutes; c__Bacilli
ASV140	168	173	87	225	0	0	0	0	d__Bacteria; p__Acidobacteriota; c__Acidobacteriae; o__Acidobacteriales; f__Acidobacteriaceae (Subgroup 1); g__uncultured
ASV141	0	0	0	0	172	61	79	42	Unclassified
ASV142	0	0	0	0	0	30	9	0	d__Bacteria; p__Proteobacteria; c__Gammaproteobacteria; o__Pseudomonadales; f__Pseudomonadaceae; g__Pseudomonas; s__Pseudomonas putida
ASV143	0	68	86	0	0	0	0	0	Unclassified
ASV144	0	0	20	24	16	103	24	31	d__Bacteria; p__Proteobacteria; c__Alphaproteobacteria; o__Sphingomonadales; f__Sphingomonadaceae; g__Sphingomonas; s__uncultured Sphingomonas sp.
ASV145	0	24	37	23	0	0	0	0	d__Bacteria; p__Proteobacteria; c__Gammaproteobacteria; o__Burkholderiales; f__Alcaligenaceae; g__Bordetella; s__uncultured bacterium
ASV146	15	0	17	17	4	11	0	0	d__Bacteria; p__Proteobacteria; c__Alphaproteobacteria; o__Acetobacterales; f__Acetobacteraceae; g__uncultured; s__uncultured bacterium
ASV147	66	93	65	60	0	0	0	0	d__Bacteria; p__Actinobacteriota; c__Actinobacteria; o__Frankiales; f__Acidothermaceae; g__Acidothermus
ASV148	0	0	77	89	0	0	0	0	d__Bacteria; p__Proteobacteria; c__Gammaproteobacteria; o__Burkholderiales; f__Oxalobacteraceae; g__Massilia
ASV149	0	12	18	0	0	0	0	0	d__Bacteria; p__Actinobacteriota; c__Actinobacteria; o__Propionibacteriales; f__Nocardioidaceae; g__Nocardioides; s__uncultured bacterium
ASV150	0	0	0	0	0	34	59	63	d__Bacteria; p__Actinobacteriota; c__Thermoleophilia; o__Gaiellales; f__Gaiellaceae; g__Gaiella; s__uncultured bacterium
ASV151	140	133	98	89	0	0	0	0	d__Bacteria; p__Proteobacteria; c__Gammaproteobacteria; o__Xanthomonadales; f__Rhodanobacteraceae; g__Rhodanobacter; s__uncultured bacterium
ASV152	0	0	0	0	80	128	103	44	Unclassified
ASV153	0	0	0	0	0	9	16	141	d__Bacteria; p__Proteobacteria; c__Gammaproteobacteria; o__Burkholderiales; f__Burkholderiaceae; g__Burkholderia-Caballeronia-Paraburkholderia
ASV154	0	0	0	0	151	0	0	39	Unclassified
ASV155	0	0	14	0	0	17	0	0	d__Bacteria; p__Proteobacteria; c__Alphaproteobacteria; o__Sphingomonadales; f__Sphingomonadaceae; g__Sphingopyxis; s__Sphingopyxis macrogoltabida
ASV156	0	0	0	0	0	162	0	0	d__Bacteria; p__Proteobacteria; c__Alphaproteobacteria; o__Sphingomonadales; f__Sphingomonadaceae; g__Ellin6055
ASV157	0	23	37	0	258	52	0	0	Unclassified
ASV158	3	0	6	3	0	0	0	0	d__Bacteria; p__Chloroflexi; c__Ktedonobacteria; o__Ktedonobacterales; f__Ktedonobacteraceae; g__uncultured; s__uncultured bacterium
ASV159	0	33	0	0	0	22	0	0	d__Bacteria; p__Proteobacteria; c__Alphaproteobacteria; o__Reyranellales; f__Reyranellaceae; g__Reyranella; s__uncultured bacterium
ASV160	90	66	120	109	0	0	0	0	d__Bacteria; p__Acidobacteriota; c__Blastocatellia; o__Pyrinomonadales; f__Pyrinomonadaceae; g__RB41
ASV161	0	0	0	0	71	82	104	76	d__Bacteria; p__Gemmatimonadota; c__Gemmatimonadetes; o__Gemmatimonadales; f__Gemmatimonadaceae; g__uncultured; s__uncultured bacterium
ASV162	0	0	0	0	95	81	74	292	d__Bacteria; p__Acidobacteriota; c__Vicinamibacteria; o__Vicinamibacterales; f__Vicinamibacteraceae; g__uncultured; s__uncultured bacterium
ASV163	0	0	30	23	0	0	0	0	d__Bacteria; p__Actinobacteriota; c__Actinobacteria; o__Micrococcales; f__Microbacteriaceae; g__Curtobacterium
ASV164	0	0	0	0	73	39	40	31	d__Bacteria; p__Nitrospirota; c__Nitrospiria; o__Nitrospirales; f__Nitrospiraceae; g__Nitrospira; s__uncultured bacterium
ASV165	120	39	82	81	0	0	0	0	d__Bacteria; p__Firmicutes; c__Thermacetogenia; o__Thermacetogeniales; f__Thermacetogeniaceae
ASV166	64	122	74	40	0	0	0	0	d__Bacteria; p__Proteobacteria; c__Gammaproteobacteria; o__Tenderiales; f__Tenderiaceae; g__Candidatus Tenderia
ASV167	0	0	0	0	220	105	153	175	d__Bacteria; p__Acidobacteriota; c__Vicinamibacteria; o__Vicinamibacterales; f__Vicinamibacteraceae; g__Luteitalea
ASV168	0	0	0	0	2	0	3	0	d__Bacteria; p__Proteobacteria; c__Gammaproteobacteria; o__Pseudomonadales; f__Halomonadaceae; g__Halomonas
ASV169	0	0	0	0	44	34	26	28	d__Bacteria; p__Gemmatimonadota; c__Gemmatimonadetes; o__Gemmatimonadales; f__Gemmatimonadaceae; g__uncultured; s__uncultured bacterium
ASV170	108	216	0	0	0	0	0	0	Unclassified
ASV171	0	0	0	0	38	63	27	16	d__Bacteria; p__Proteobacteria; c__Gammaproteobacteria; o__Burkholderiales; f__Comamonadaceae; g__Ramlibacter
ASV172	0	0	0	0	0	24	0	0	d__Bacteria; p__Bacteroidota; c__Bacteroidia; o__Chitinophagales; f__Chitinophagaceae; g__uncultured; s__uncultured bacterium
ASV173	0	0	5	14	0	0	0	0	d__Bacteria; p__Cyanobacteria; c__Cyanobacteriia; o__Oxyphotobacteria Incertae Sedis; f__Unknown Family; g__Leptolyngbya EcFYyyy-00; s__uncultured bacterium
ASV174	152	116	63	170	0	0	0	0	d__Bacteria; p__Firmicutes; c__Thermincolia; o__Carboxydocellales; f__Carboxydocellaceae; g__Carboxydocella; s__Carboxydocella thermautotrophica
ASV175	0	0	0	0	0	28	0	0	d__Bacteria; p__Proteobacteria; c__Alphaproteobacteria; o__Sphingomonadales; f__Sphingomonadaceae; g__Altererythrobacter
ASV176	0	13	0	11	0	24	0	0	d__Bacteria; p__Proteobacteria; c__Gammaproteobacteria; o__Burkholderiales; f__Comamonadaceae; g__Curvibacter
ASV177	0	0	0	0	0	0	8	0	d__Bacteria; p__Gemmatimonadota; c__Gemmatimonadetes; o__Gemmatimonadales; f__Gemmatimonadaceae; g__uncultured; s__uncultured bacterium
ASV178	152	163	111	173	0	0	0	0	d__Bacteria; p__Acidobacteriota; c__Acidobacteriae; o__Acidobacteriales; f__Acidobacteriaceae (Subgroup 1); g__uncultured
ASV179	0	0	0	0	0	20	0	0	d__Bacteria; p__Proteobacteria; c__Gammaproteobacteria; o__Xanthomonadales; f__Rhodanobacteraceae; g__Frateuria
ASV180	0	0	0	0	81	42	56	58	d__Bacteria; p__Verrucomicrobiota; c__Verrucomicrobiae; o__Chthoniobacterales; f__Chthoniobacteraceae; g__Candidatus Udaeobacter; s__uncultured bacterium
ASV181	0	0	0	0	0	40	0	0	d__Bacteria; p__Proteobacteria; c__Gammaproteobacteria; o__Burkholderiales; f__Nitrosomonadaceae; g__Ellin6067; s__uncultured bacterium
ASV182	0	0	0	0	20	23	9	11	d__Bacteria; p__Chloroflexi; c__Chloroflexia; o__Thermomicrobiales; f__Thermomicrobiaceae; g__Nitrolancea; s__uncultured bacterium
ASV183	31	24	0	0	25	28	17	0	d__Bacteria; p__Proteobacteria; c__Gammaproteobacteria; o__Burkholderiales; f__Oxalobacteraceae; g__Herbaspirillum
ASV184	0	0	0	0	0	26	0	0	d__Bacteria; p__Proteobacteria; c__Gammaproteobacteria; o__Burkholderiales; f__Nitrosomonadaceae; g__uncultured; s__uncultured bacterium
ASV185	0	0	0	0	13	32	10	24	d__Bacteria; p__Gemmatimonadota; c__Gemmatimonadetes; o__Gemmatimonadales; f__Gemmatimonadaceae; g__uncultured
ASV186	118	119	182	123	0	0	0	0	d__Bacteria; p__Gemmatimonadota; c__Gemmatimonadetes; o__Gemmatimonadales; f__Gemmatimonadaceae; g__Gemmatimonas; s__uncultured bacterium
ASV187	0	0	0	0	60	34	26	42	d__Bacteria; p__Chloroflexi; c__Chloroflexia; o__Thermobaculales; f__Thermobaculaceae; g__Thermobaculum; s__uncultured bacterium
ASV188	21	28	16	12	20	18	0	0	d__Bacteria; p__Nitrospirota; c__Nitrospiria; o__Nitrospirales; f__Nitrospiraceae; g__Nitrospira; s__uncultured bacterium
ASV189	0	0	0	0	99	72	100	79	d__Bacteria; p__Acidobacteriota; c__Vicinamibacteria; o__Vicinamibacterales; f__Vicinamibacteraceae; g__Luteitalea; s__uncultured bacterium
ASV190	0	0	0	0	0	18	0	0	d__Bacteria; p__Gemmatimonadota; c__Gemmatimonadetes; o__Gemmatimonadales; f__Gemmatimonadaceae; g__uncultured
ASV191	12	20	14	21	11	23	41	0	d__Bacteria; p__Proteobacteria; c__Alphaproteobacteria; o__Rhizobiales; f__Labraceae; g__Labrys
ASV192	0	0	0	0	113	64	36	50	d__Bacteria; p__Acidobacteriota; c__Vicinamibacteria; o__Vicinamibacterales; f__Vicinamibacteraceae; g__Luteitalea
ASV193	0	0	0	0	54	0	66	47	Unclassified
ASV194	54	60	90	59	0	0	0	0	d__Bacteria; p__Acidobacteriota; c__Holophagae; o__Holophagales; f__Holophagaceae; g__Holophaga
ASV195	0	0	0	0	79	70	33	48	d__Bacteria; p__Verrucomicrobiota; c__Verrucomicrobiae; o__Chthoniobacterales; f__Chthoniobacteraceae; g__Candidatus Udaeobacter
ASV196	0	0	0	0	53	90	44	35	d__Bacteria; p__Actinobacteriota; c__Actinobacteria; o__Propionibacteriales; f__Nocardioidaceae; g__Nocardioides
ASV197	104	81	54	53	0	0	0	0	d__Bacteria; p__Acidobacteriota; c__Acidobacteriae; o__Acidobacteriales; f__Acidobacteriaceae (Subgroup 1); g__uncultured
ASV198	0	0	0	0	0	17	0	0	d__Bacteria; p__Bacteroidota; c__Bacteroidia; o__Chitinophagales; f__Chitinophagaceae; g__uncultured; s__uncultured soil bacterium
ASV199	0	0	0	0	167	55	47	114	d__Bacteria; p__Acidobacteriota; c__Acidobacteriae; o__Acidobacteriales; f__Acidobacteriaceae (Subgroup 1); g__uncultured; s__uncultured bacterium
ASV200	0	0	0	0	213	76	138	215	d__Bacteria
ASV201	0	0	0	0	134	81	95	78	d__Bacteria; p__Acidobacteriota; c__Blastocatellia; o__Pyrinomonadales; f__Pyrinomonadaceae; g__RB41; s__uncultured bacterium
ASV202	0	0	0	0	74	94	128	73	d__Bacteria; p__Gemmatimonadota; c__Gemmatimonadetes; o__Gemmatimonadales; f__Gemmatimonadaceae; g__uncultured
ASV203	0	0	0	0	0	4	0	0	d__Bacteria; p__Proteobacteria; c__Gammaproteobacteria; o__Pseudomonadales; f__Marinobacteraceae; g__Marinobacter
ASV204	0	0	4	0	0	0	0	0	d__Bacteria; p__Proteobacteria; c__Alphaproteobacteria; o__Micropepsales; f__Micropepsaceae; g__uncultured
ASV205	0	0	0	0	40	51	59	123	d__Bacteria; p__Firmicutes; c__Clostridia; o__Clostridiales; f__Clostridiaceae; g__Clostridium sensu stricto 1
ASV206	0	0	14	0	0	0	0	0	d__Bacteria; p__Actinobacteriota; c__Actinobacteria; o__Frankiales; f__Geodermatophilaceae; g__Geodermatophilus; s__uncultured bacterium
ASV207	106	155	71	101	0	0	0	0	d__Bacteria; p__Proteobacteria; c__Alphaproteobacteria; o__Rhizobiales; f__Xanthobacteraceae; g__uncultured; s__uncultured bacterium
ASV208	0	0	0	0	95	87	129	92	Unclassified
ASV209	7	5	51	14	0	0	0	0	Unclassified
ASV210	0	0	0	0	125	132	60	53	d__Bacteria; p__Proteobacteria; c__Gammaproteobacteria; o__Burkholderiales; f__Nitrosomonadaceae; g__Ellin6067; s__uncultured bacterium
ASV211	0	0	0	0	0	31	0	0	d__Bacteria; p__Proteobacteria; c__Gammaproteobacteria; o__Xanthomonadales; f__Xanthomonadaceae; g__Luteimonas
ASV212	19	15	13	11	0	29	0	0	d__Bacteria; p__Myxococcota; c__Polyangia; o__Polyangiales; f__Polyangiaceae; g__Pajaroellobacter; s__uncultured bacterium
ASV213	246	115	101	104	0	0	0	0	d__Bacteria; p__Acidobacteriota; c__Acidobacteriae; o__Acidobacteriales; f__Acidobacteriaceae (Subgroup 1); g__uncultured; s__uncultured bacterium
ASV214	179	71	67	102	0	0	0	0	d__Bacteria; p__Acidobacteriota; c__Acidobacteriae; o__Acidobacteriales; f__Acidobacteriaceae (Subgroup 1); g__uncultured
ASV215	0	0	0	0	14	31	12	33	d__Bacteria; p__Chloroflexi; c__Chloroflexia; o__Thermomicrobiales; f__Thermomicrobiaceae; g__Nitrolancea; s__uncultured bacterium
ASV216	0	0	0	0	156	77	51	106	d__Bacteria; p__Acidobacteriota; c__Blastocatellia; o__Pyrinomonadales; f__Pyrinomonadaceae; g__RB41; s__uncultured bacterium
ASV217	0	0	0	0	0	39	0	0	d__Bacteria; p__Proteobacteria; c__Alphaproteobacteria; o__Rhizobiales; f__Rhizobiaceae; g__Mesorhizobium; s__metagenome
ASV218	0	0	19	0	34	29	27	45	d__Bacteria; p__Proteobacteria; c__Gammaproteobacteria; o__Burkholderiales; f__Nitrosomonadaceae; g__MND1
ASV219	147	118	111	93	0	0	0	0	d__Bacteria; p__Acidobacteriota; c__Acidobacteriae; o__Acidobacteriales; f__Acidobacteriaceae (Subgroup 1); g__uncultured; s__uncultured bacterium
ASV220	73	196	59	57	0	0	0	0	d__Bacteria; p__Proteobacteria; c__Gammaproteobacteria; o__Steroidobacterales; f__Steroidobacteraceae; g__uncultured; s__uncultured bacterium
ASV221	0	0	0	0	73	71	224	129	d__Bacteria; p__Acidobacteriota; c__Thermoanaerobaculia; o__Thermoanaerobaculales; f__Thermoanaerobaculaceae; g__TPD-58; s__uncultured bacterium
ASV222	13	14	15	14	0	9	10	7	d__Bacteria; p__Proteobacteria; c__Alphaproteobacteria; o__Rhizobiales; f__Xanthobacteraceae; g__Pseudolabrys
ASV223	0	0	0	0	46	58	48	80	d__Bacteria; p__Proteobacteria; c__Gammaproteobacteria; o__Burkholderiales; f__Rhodocyclaceae; g__uncultured; s__uncultured bacterium
ASV224	12	17	21	0	0	0	0	0	d__Bacteria; p__Actinobacteriota; c__Actinobacteria; o__Frankiales; f__Frankiaceae; g__Jatrophihabitans
ASV225	0	0	0	0	103	109	89	104	d__Bacteria; p__Gemmatimonadota; c__Longimicrobia; o__Longimicrobiales; f__Longimicrobiaceae; g__Longimicrobium
ASV226	0	0	0	0	27	31	21	11	d__Bacteria; p__Chloroflexi; c__Chloroflexia; o__Chloroflexales; f__Roseiflexaceae; g__uncultured; s__uncultured bacterium
ASV227	110	99	107	94	0	0	0	0	d__Bacteria; p__Chloroflexi; c__Ktedonobacteria; o__Ktedonobacterales; f__Ktedonobacteraceae; g__HSB OF53-F07; s__uncultured bacterium
ASV228	85	102	49	41	0	0	0	0	d__Bacteria; p__Proteobacteria; c__Alphaproteobacteria; o__Azospirillales; f__Azospirillaceae; g__Skermanella
ASV229	193	141	94	50	0	0	0	0	d__Bacteria; p__Bdellovibrionota; c__Bdellovibrionia; o__Bdellovibrionales; f__Bdellovibrionaceae; g__OM27 clade; s__uncultured delta proteobacterium
ASV230	0	0	0	0	62	65	126	57	Unclassified
ASV231	0	0	0	0	114	74	52	52	d__Bacteria; p__Chloroflexi; c__Anaerolineae; o__Anaerolineales; f__Anaerolineaceae; g__uncultured; s__uncultured Chloroflexi bacterium
ASV232	0	0	0	0	0	15	0	0	d__Bacteria; p__Acidobacteriota; c__Acidobacteriae; o__Acidobacteriales; f__Acidobacteriaceae (Subgroup 1); g__uncultured
ASV233	0	0	0	0	24	36	6	0	d__Bacteria; p__Proteobacteria; c__Alphaproteobacteria; o__Sphingomonadales; f__Sphingomonadaceae; g__Sphingomonas
ASV234	0	0	0	0	0	28	22	0	d__Bacteria; p__Actinobacteriota; c__Actinobacteria; o__Propionibacteriales; f__Nocardioidaceae; g__Nocardioides; s__Nocardioides sp.
ASV235	0	0	0	0	0	53	0	47	d__Bacteria; p__Actinobacteriota; c__Thermoleophilia; o__Solirubrobacterales; f__Solirubrobacteraceae
ASV236	0	0	0	0	81	54	60	84	d__Bacteria; p__Chloroflexi; c__Anaerolineae; o__Anaerolineales; f__Anaerolineaceae; g__uncultured; s__uncultured bacterium
ASV237	30	52	119	104	0	0	0	0	d__Bacteria; p__Bacteroidota; c__Bacteroidia; o__Sphingobacteriales; f__Sphingobacteriaceae; g__Mucilaginibacter
ASV238	0	0	0	0	74	0	67	80	d__Bacteria
ASV239	0	2	28	7	0	9	0	0	d__Bacteria; p__Bacteroidota; c__Bacteroidia; o__Sphingobacteriales; f__Sphingobacteriaceae; g__Pedobacter; s__uncultured bacterium
ASV240	27	28	35	0	0	16	21	18	d__Bacteria; p__Proteobacteria; c__Gammaproteobacteria; o__Burkholderiales
ASV241	0	0	0	0	3	41	0	0	d__Bacteria; p__Chloroflexi; c__Anaerolineae; o__SBR1031; f__A4b; g__OLB13; s__uncultured bacterium
ASV242	0	0	0	0	0	20	0	0	Unclassified
ASV243	0	0	0	0	57	36	44	19	d__Bacteria; p__Chloroflexi; c__Anaerolineae; o__Anaerolineales; f__Anaerolineaceae; g__uncultured; s__uncultured bacterium
ASV244	0	0	0	0	78	127	321	62	d__Bacteria; p__Entotheonellaeota; c__Entotheonellia; o__Entotheonellales; f__Entotheonellaceae; g__Candidatus Entotheonella; s__uncultured Candidatus Entotheonella sp.
ASV245	0	0	30	0	0	10	0	0	d__Bacteria; p__Bacteroidota; c__Bacteroidia; o__Chitinophagales; f__Chitinophagaceae; g__Flavitalea
ASV246	30	18	51	16	0	0	0	0	d__Bacteria; p__Proteobacteria; c__Gammaproteobacteria; o__Burkholderiales; f__Burkholderiaceae; g__Ralstonia
ASV247	0	0	0	0	43	40	25	0	d__Bacteria; p__Proteobacteria; c__Gammaproteobacteria; o__Burkholderiales; f__Oxalobacteraceae; g__Massilia; s__uncultured bacterium
ASV248	0	0	27	0	0	0	0	0	d__Bacteria; p__Proteobacteria; c__Alphaproteobacteria; o__Sphingomonadales; f__Sphingomonadaceae; g__Sphingopyxis
ASV249	0	0	0	0	63	53	83	122	d__Bacteria; p__Acidobacteriota
ASV250	0	0	0	0	0	32	70	43	d__Bacteria; p__Proteobacteria; c__Gammaproteobacteria; o__Steroidobacterales; f__Woeseiaceae; g__Woeseia; s__uncultured bacterium
ASV251	22	41	45	35	0	0	0	0	d__Bacteria; p__Actinobacteriota; c__Actinobacteria; o__Frankiales; f__Acidothermaceae; g__Acidothermus; s__uncultured bacterium
ASV252	11	15	0	13	0	15	0	0	d__Bacteria; p__Bacteroidota; c__Bacteroidia; o__Chitinophagales; f__Chitinophagaceae; g__Chitinophaga; s__uncultured Chitinophaga sp.
ASV253	0	0	0	0	0	31	0	0	d__Bacteria; p__Actinobacteriota; c__Actinobacteria; o__Micrococcales; f__Intrasporangiaceae; g__Pedococcus-Phycicoccus
ASV254	0	0	0	0	0	69	50	57	d__Bacteria; p__Chloroflexi; c__Chloroflexia; o__Chloroflexales; f__Roseiflexaceae; g__uncultured
ASV255	62	108	51	59	0	0	87	0	d__Bacteria; p__Proteobacteria; c__Alphaproteobacteria; o__Rhizobiales; f__Xanthobacteraceae; g__Pseudolabrys
ASV256	0	0	0	0	50	19	25	56	d__Bacteria; p__Chloroflexi; c__Anaerolineae; o__Anaerolineales; f__Anaerolineaceae; g__uncultured; s__uncultured bacterium
ASV257	0	0	0	0	196	74	71	101	d__Bacteria; p__Acidobacteriota; c__Vicinamibacteria; o__Vicinamibacterales; f__Vicinamibacteraceae; g__Luteitalea; s__uncultured Acidobacteria bacterium
ASV258	33	32	33	22	0	0	0	0	d__Bacteria; p__Actinobacteriota; c__Thermoleophilia; o__Gaiellales; f__Gaiellaceae; g__Gaiella
ASV259	0	0	0	0	0	23	0	0	d__Bacteria; p__Planctomycetota; c__Planctomycetes; o__Planctomycetales; f__Gimesiaceae; g__uncultured; s__uncultured bacterium
ASV260	8	0	13	0	0	0	0	0	d__Bacteria; p__Proteobacteria; c__Gammaproteobacteria; o__Xanthomonadales; f__Xanthomonadaceae; g__Lysobacter
ASV261	0	0	0	0	45	81	0	0	d__Bacteria; p__Proteobacteria; c__Gammaproteobacteria; o__Xanthomonadales; f__Xanthomonadaceae; g__Lysobacter; s__uncultured bacterium
ASV262	57	43	60	75	0	0	0	0	d__Bacteria; p__Chloroflexi; c__Ktedonobacteria; o__Ktedonobacterales; f__Ktedonobacteraceae; g__1921-2
ASV263	139	51	49	53	0	0	0	0	d__Bacteria; p__Acidobacteriota; c__Acidobacteriae; o__Acidobacteriales; f__Acidobacteriaceae (Subgroup 1); g__Granulicella
ASV264	0	0	0	0	4	22	0	0	d__Bacteria; p__Proteobacteria; c__Gammaproteobacteria; o__Burkholderiales; f__Alcaligenaceae; g__Candidimonas
ASV265	0	0	0	0	87	78	63	149	d__Bacteria; p__Actinobacteriota; c__Actinobacteria; o__Streptomycetales; f__Streptomycetaceae; g__Streptomyces
ASV266	27	28	31	35	0	0	0	0	Unclassified
ASV267	0	0	0	0	421	92	90	0	Unclassified
ASV268	46	36	25	161	0	0	0	0	d__Bacteria; p__Firmicutes; c__Thermincolia; o__Carboxydocellales; f__Carboxydocellaceae; g__Carboxydocella; s__Carboxydocella thermautotrophica
ASV269	0	0	0	0	54	69	46	60	d__Bacteria; p__Chloroflexi; c__Anaerolineae; o__Anaerolineales; f__Anaerolineaceae
ASV270	0	0	0	0	195	74	70	137	d__Bacteria; p__Acidobacteriota; c__Blastocatellia; o__Pyrinomonadales; f__Pyrinomonadaceae; g__RB41; s__uncultured bacterium
ASV271	0	0	0	0	109	0	35	0	d__Bacteria; p__Acidobacteriota; c__Blastocatellia; o__Pyrinomonadales; f__Pyrinomonadaceae; g__RB41; s__uncultured bacterium
ASV272	84	72	85	105	0	0	0	0	d__Bacteria; p__Acidobacteriota
ASV273	0	0	0	0	97	78	35	41	d__Bacteria; p__Gemmatimonadota; c__Longimicrobia; o__Longimicrobiales; f__Longimicrobiaceae; g__Longimicrobium
ASV274	27	0	45	0	0	0	0	0	d__Bacteria; p__Verrucomicrobiota; c__Verrucomicrobiae; o__Pedosphaerales; f__Pedosphaeraceae; g__uncultured; s__uncultured bacterium
ASV275	0	0	0	0	87	80	0	64	d__Bacteria
ASV276	70	93	89	55	0	0	0	0	d__Bacteria; p__Proteobacteria; c__Alphaproteobacteria; o__Sphingomonadales; f__Sphingomonadaceae; g__Sphingomonas
ASV277	93	43	34	200	0	0	0	0	d__Bacteria; p__Firmicutes; c__Bacilli
ASV278	171	170	58	86	0	0	0	0	Unclassified
ASV279	0	0	0	0	63	26	44	0	d__Bacteria
ASV280	0	0	0	13	0	0	32	0	d__Bacteria
ASV281	13	0	0	0	0	0	0	0	d__Bacteria; p__Proteobacteria; c__Gammaproteobacteria; o__Xanthomonadales; f__Rhodanobacteraceae; g__Rudaea
ASV282	0	0	0	0	0	17	0	0	d__Bacteria; p__Verrucomicrobiota; c__Verrucomicrobiae; o__Pedosphaerales; f__Pedosphaeraceae; g__ADurb.Bin063-1
ASV283	0	0	0	0	48	87	44	77	d__Bacteria; p__Proteobacteria; c__Gammaproteobacteria; o__Xanthomonadales; f__Xanthomonadaceae; g__Lysobacter; s__uncultured bacterium
ASV284	0	0	0	0	0	4	0	0	d__Bacteria; p__Cyanobacteria; c__Cyanobacteriia; o__Cyanobacteriales; f__Cyanobacteriaceae; g__Geminocystis PCC-6308
ASV285	0	0	0	0	14	16	11	0	d__Bacteria; p__Chloroflexi; c__Anaerolineae; o__Anaerolineales; f__Anaerolineaceae; g__uncultured; s__uncultured bacterium
ASV286	169	94	70	96	0	0	0	0	d__Bacteria; p__Acidobacteriota; c__Acidobacteriae; o__Acidobacteriales
ASV287	0	0	0	0	3	33	0	0	d__Bacteria; p__Verrucomicrobiota; c__Verrucomicrobiae; o__Pedosphaerales; f__Pedosphaeraceae; g__DEV008; s__metagenome
ASV288	41	102	33	44	0	0	0	0	Unclassified
ASV289	0	0	0	0	113	94	155	83	d__Bacteria; p__Gemmatimonadota; c__Gemmatimonadetes; o__Gemmatimonadales; f__Gemmatimonadaceae; g__uncultured; s__uncultured bacterium
ASV290	0	0	9	0	0	0	0	0	d__Bacteria; p__Proteobacteria; c__Gammaproteobacteria; o__Xanthomonadales; f__Rhodanobacteraceae; g__Frateuria
ASV291	0	0	0	0	71	50	51	84	d__Bacteria; p__Actinobacteriota; c__Actinobacteria; o__Streptomycetales; f__Streptomycetaceae; g__Streptomyces
ASV292	0	0	0	0	15	25	18	12	d__Bacteria; p__Actinobacteriota; c__Actinobacteria; o__Corynebacteriales; f__Mycobacteriaceae; g__Mycobacterium
ASV293	0	0	45	0	0	0	0	31	d__Bacteria; p__Actinobacteriota; c__Actinobacteria; o__Streptomycetales; f__Streptomycetaceae; g__Streptomyces
ASV294	0	0	0	0	0	25	15	21	d__Bacteria; p__Gemmatimonadota; c__Gemmatimonadetes; o__Gemmatimonadales; f__Gemmatimonadaceae; g__uncultured; s__uncultured bacterium
ASV295	0	0	0	0	45	40	29	107	d__Bacteria; p__Actinobacteriota; c__Actinobacteria; o__Streptomycetales; f__Streptomycetaceae; g__Streptomyces
ASV296	124	145	39	74	0	0	0	0	d__Bacteria; p__Acidobacteriota; c__Acidobacteriae; o__Acidobacteriales; f__Acidobacteriaceae (Subgroup 1); g__uncultured; s__uncultured bacterium
ASV297	0	0	13	29	0	0	0	0	d__Bacteria; p__Proteobacteria; c__Gammaproteobacteria; o__Xanthomonadales; f__Rhodanobacteraceae
ASV298	0	0	0	0	0	64	0	0	d__Bacteria; p__Proteobacteria; c__Gammaproteobacteria; o__Xanthomonadales; f__Xanthomonadaceae; g__Lysobacter
ASV299	3	0	0	3	0	0	0	0	d__Bacteria; p__Chloroflexi; c__Anaerolineae; o__Anaerolineales; f__Anaerolineaceae; g__uncultured
ASV300	0	38	0	0	0	0	0	0	d__Bacteria; p__Acidobacteriota; c__Vicinamibacteria; o__Vicinamibacterales; f__Vicinamibacteraceae; g__uncultured
ASV301	67	52	55	76	0	0	0	0	d__Bacteria; p__Chloroflexi; c__Ktedonobacteria; o__Ktedonobacterales; f__Ktedonobacteraceae; g__HSB OF53-F07
ASV302	38	66	31	25	0	0	0	0	d__Bacteria; p__Actinobacteriota; c__Actinobacteria; o__Streptomycetales; f__Streptomycetaceae; g__Streptomyces; s__Streptomyces flaveus
ASV303	133	141	52	76	0	0	0	0	Unclassified
ASV304	0	0	0	0	33	12	0	10	d__Bacteria; p__Acidobacteriota; c__Blastocatellia; o__Blastocatellales; f__Blastocatellaceae; g__uncultured; s__uncultured bacterium
ASV305	6	0	0	0	0	19	15	38	d__Bacteria; p__Acidobacteriota; c__Thermoanaerobaculia; o__Thermoanaerobaculales; f__Thermoanaerobaculaceae; g__Subgroup 10; s__uncultured bacterium
ASV306	0	33	39	40	0	0	0	0	d__Bacteria; p__Proteobacteria; c__Gammaproteobacteria; o__Burkholderiales; f__Oxalobacteraceae; g__Noviherbaspirillum; s__uncultured bacterium
ASV307	0	0	0	0	0	22	0	0	d__Bacteria; p__Proteobacteria; c__Alphaproteobacteria; o__Rhizobiales; f__Xanthobacteraceae
ASV308	0	0	0	0	0	29	0	0	d__Bacteria; p__Chloroflexi; c__Anaerolineae; o__Anaerolineales; f__Anaerolineaceae; g__uncultured; s__uncultured bacterium
ASV309	0	10	0	0	0	0	0	0	d__Bacteria; p__Actinobacteriota; c__Actinobacteria; o__Micromonosporales; f__Micromonosporaceae; g__Rugosimonospora
ASV310	0	0	0	0	0	121	29	0	d__Bacteria; p__Proteobacteria; c__Gammaproteobacteria; o__Xanthomonadales; f__Rhodanobacteraceae
ASV311	0	0	0	0	25	17	0	0	d__Bacteria; p__Chloroflexi; c__Chloroflexia; o__Thermobaculales; f__Thermobaculaceae; g__Thermobaculum; s__uncultured bacterium
ASV312	21	32	43	27	0	0	0	0	d__Bacteria; p__Actinobacteriota; c__Acidimicrobiia; o__Microtrichales
ASV313	40	29	0	0	28	0	26	0	d__Bacteria; p__Proteobacteria; c__Alphaproteobacteria; o__Rhizobiales; f__Rhizobiaceae; g__Mesorhizobium
ASV314	0	0	0	0	74	50	20	37	d__Bacteria; p__Acidobacteriota; c__Vicinamibacteria; o__Vicinamibacterales; f__Vicinamibacteraceae; g__Luteitalea; s__uncultured bacterium
ASV315	0	0	0	0	0	20	0	0	d__Bacteria; p__Chloroflexi; c__Chloroflexia; o__Thermomicrobiales; f__Thermomicrobiaceae; g__Nitrolancea; s__uncultured bacterium
ASV316	0	0	0	0	0	7	0	0	d__Bacteria; p__Myxococcota; c__Polyangia; o__Polyangiales; f__Sandaracinaceae; g__uncultured; s__uncultured bacterium
ASV317	0	304	0	0	0	0	0	0	Unclassified
ASV318	0	0	6	0	0	31	19	0	d__Bacteria; p__Firmicutes; c__Bacilli; o__Alicyclobacillales; f__Alicyclobacillaceae; g__Tumebacillus; s__uncultured bacterium
ASV319	0	0	0	0	67	46	25	64	d__Bacteria; p__Acidobacteriota; c__Blastocatellia; o__Pyrinomonadales; f__Pyrinomonadaceae; g__RB41; s__uncultured Acidobacteria bacterium
ASV320	0	0	0	0	34	42	47	36	d__Bacteria; p__Acidobacteriota; c__Vicinamibacteria; o__Vicinamibacterales; f__Vicinamibacteraceae
ASV321	0	0	0	0	0	19	0	0	d__Bacteria; p__Gemmatimonadota; c__Longimicrobia; o__Longimicrobiales; f__Longimicrobiaceae; g__YC-ZSS-LKJ147; s__uncultured bacterium
ASV322	119	83	47	37	0	0	0	0	d__Bacteria; p__Firmicutes; c__Thermincolia; o__Carboxydocellales; f__Carboxydocellaceae; g__Carboxydocella; s__Carboxydocella thermautotrophica
ASV323	0	0	0	0	0	9	0	0	d__Bacteria; p__Proteobacteria; c__Gammaproteobacteria; o__Pseudomonadales; f__Cellvibrionaceae; g__Cellvibrio
ASV324	41	25	32	28	0	0	0	0	d__Bacteria; p__Actinobacteriota; c__Actinobacteria; o__Micrococcales; f__Microbacteriaceae; g__Leifsonia
ASV325	84	75	62	52	0	0	0	0	d__Bacteria; p__Chloroflexi; c__Anaerolineae; o__Anaerolineales; f__Anaerolineaceae; g__uncultured
ASV326	0	0	0	0	0	38	0	0	d__Bacteria; p__Proteobacteria; c__Alphaproteobacteria; o__Rhizobiales; f__Rhizobiaceae; g__Aureimonas
ASV327	0	0	0	0	4	0	0	0	d__Bacteria; p__Gemmatimonadota; c__Gemmatimonadetes; o__Gemmatimonadales; f__Gemmatimonadaceae; g__uncultured; s__uncultured bacterium
ASV328	0	4	0	0	0	0	0	0	d__Bacteria; p__Proteobacteria; c__Gammaproteobacteria; o__Salinisphaerales; f__Solimonadaceae; g__Alkanibacter; s__uncultured bacterium
ASV329	0	0	0	0	31	40	51	12	Unclassified
ASV330	5	0	36	0	0	23	9	15	d__Bacteria; p__Proteobacteria; c__Alphaproteobacteria; o__Sphingomonadales; f__Sphingomonadaceae; g__Sphingobium
ASV331	51	0	31	0	0	0	0	0	d__Bacteria; p__Planctomycetota; c__Planctomycetes; o__Pirellulales; f__Pirellulaceae; g__uncultured; s__uncultured bacterium
ASV332	16	0	26	16	0	12	0	0	d__Bacteria; p__Proteobacteria; c__Alphaproteobacteria; o__Sphingomonadales; f__Sphingomonadaceae; g__Sphingomonas
ASV333	0	0	0	0	64	0	82	121	d__Bacteria; p__Acidobacteriota; c__Vicinamibacteria; o__Vicinamibacterales; f__Vicinamibacteraceae; g__Luteitalea; s__uncultured bacterium
ASV334	0	0	0	0	37	16	0	56	d__Bacteria; p__Acidobacteriota; c__Vicinamibacteria; o__Vicinamibacterales; f__Vicinamibacteraceae; g__Luteitalea; s__uncultured bacterium
ASV335	35	50	44	40	0	0	0	0	d__Bacteria; p__Actinobacteriota; c__Actinobacteria; o__Pseudonocardiales; f__Pseudonocardiaceae; g__Crossiella; s__uncultured bacterium
ASV336	44	30	32	28	0	0	0	0	d__Bacteria; p__Proteobacteria; c__Gammaproteobacteria; o__Gammaproteobacteria Incertae Sedis; f__Unknown Family; g__Acidibacter; s__uncultured gamma proteobacterium
ASV337	0	0	0	0	0	10	14	0	d__Bacteria; p__Proteobacteria; c__Alphaproteobacteria; o__Rhizobiales; f__Rhizobiaceae; g__Pseudaminobacter
ASV338	28	33	63	27	0	0	0	0	d__Bacteria; p__Actinobacteriota; c__Actinobacteria; o__Micrococcales; f__Intrasporangiaceae; g__Terrabacter
ASV339	0	0	0	0	0	43	50	0	d__Bacteria; p__Proteobacteria; c__Gammaproteobacteria; o__Burkholderiales; f__Nitrosomonadaceae; g__MND1; s__uncultured bacterium
ASV340	7	12	8	22	4	13	0	0	d__Bacteria; p__Proteobacteria; c__Alphaproteobacteria; o__Rhizobiales; f__Beijerinckiaceae; g__Methylobacterium-Methylorubrum
ASV341	28	36	15	33	0	0	6	0	d__Bacteria; p__Proteobacteria; c__Alphaproteobacteria
ASV342	9	11	0	14	0	13	8	0	d__Bacteria; p__Proteobacteria; c__Alphaproteobacteria; o__Rhizobiales; f__Xanthobacteraceae; g__Rhodopseudomonas
ASV343	49	39	53	78	0	0	0	0	d__Bacteria; p__Chloroflexi; c__Ktedonobacteria; o__Ktedonobacterales; f__Ktedonobacteraceae; g__1921-2; s__uncultured bacterium
ASV344	7	29	28	20	0	0	0	0	d__Bacteria; p__Bacteroidota; c__Bacteroidia; o__Chitinophagales; f__Chitinophagaceae; g__Dinghuibacter; s__uncultured bacterium
ASV345	14	0	45	0	0	0	0	0	d__Bacteria; p__Planctomycetota; c__Planctomycetes; o__Isosphaerales; f__Isosphaeraceae; g__uncultured; s__uncultured planctomycete
ASV346	84	61	50	59	0	0	0	0	d__Bacteria; p__Firmicutes; c__Bacilli; o__Caldalkalibacillales; f__Caldalkalibacillaceae; g__Caldalkalibacillus
ASV347	84	84	72	143	0	0	0	0	d__Bacteria; p__Firmicutes; c__Bacilli; o__Caldalkalibacillales; f__Caldalkalibacillaceae; g__Caldalkalibacillus
ASV348	91	36	78	63	0	0	0	0	d__Bacteria; p__Acidobacteriota; c__Blastocatellia; o__Pyrinomonadales; f__Pyrinomonadaceae; g__RB41
ASV349	23	18	24	33	0	0	0	0	d__Bacteria; p__Acidobacteriota; c__Acidobacteriae; o__Acidobacteriales; f__Acidobacteriaceae (Subgroup 1); g__uncultured; s__uncultured bacterium
ASV350	0	0	0	0	0	8	0	0	d__Bacteria; p__Gemmatimonadota; c__Gemmatimonadetes; o__Gemmatimonadales; f__Gemmatimonadaceae; g__Gemmatimonas; s__uncultured Gemmatimonas sp.
ASV351	0	0	0	0	0	28	53	0	d__Bacteria; p__Proteobacteria; c__Alphaproteobacteria; o__Defluviicoccales; f__Defluviicoccaceae; g__Defluviicoccus
ASV352	24	44	29	26	0	0	0	0	d__Bacteria; p__Gemmatimonadota; c__Gemmatimonadetes; o__Gemmatimonadales; f__Gemmatimonadaceae; g__uncultured
ASV353	0	0	0	0	0	41	0	0	d__Bacteria; p__Gemmatimonadota; c__Gemmatimonadetes; o__Gemmatimonadales; f__Gemmatimonadaceae; g__uncultured; s__uncultured bacterium
ASV354	0	0	10	0	0	0	0	0	d__Bacteria; p__Actinobacteriota; c__Actinobacteria; o__Streptomycetales; f__Streptomycetaceae; g__Streptomyces; s__Streptomyces sp.
ASV355	0	0	0	0	21	36	9	7	d__Bacteria; p__Proteobacteria; c__Alphaproteobacteria; o__Sphingomonadales; f__Sphingomonadaceae
ASV356	0	0	0	0	0	11	0	0	d__Bacteria; p__Proteobacteria; c__Gammaproteobacteria; o__Burkholderiales; f__Rhodocyclaceae; g__Candidatus Accumulibacter
ASV357	0	0	0	0	33	0	19	61	d__Bacteria; p__Actinobacteriota; c__Actinobacteria; o__Streptomycetales; f__Streptomycetaceae; g__Streptomyces
ASV358	0	21	34	0	0	0	0	0	Unclassified
ASV359	0	0	0	0	30	43	65	37	d__Bacteria; p__Proteobacteria; c__Gammaproteobacteria; o__Gammaproteobacteria Incertae Sedis; f__Unknown Family; g__Acidibacter; s__uncultured bacterium
ASV360	60	62	31	67	0	0	0	0	d__Bacteria; p__Firmicutes; c__Bacilli; o__Paenibacillales; f__Paenibacillaceae; g__Paenibacillus
ASV361	0	0	0	0	0	28	0	0	d__Bacteria; p__Proteobacteria; c__Gammaproteobacteria; o__Diplorickettsiales; f__Diplorickettsiaceae; g__Aquicella
ASV362	0	0	0	0	35	23	44	23	d__Bacteria; p__Proteobacteria; c__Gammaproteobacteria; o__Pseudomonadales; f__Halomonadaceae
ASV363	0	0	0	0	51	68	125	35	Unclassified
ASV364	57	101	54	52	0	0	0	0	d__Bacteria; p__Acidobacteriota; c__Thermoanaerobaculia; o__Thermoanaerobaculales; f__Thermoanaerobaculaceae; g__Subgroup 10; s__uncultured bacterium
ASV365	0	0	0	0	30	42	39	33	d__Bacteria; p__Bacteroidota; c__Bacteroidia; o__Cytophagales; f__Microscillaceae; g__uncultured
ASV366	0	15	19	0	0	0	0	0	d__Bacteria; p__Bacteroidota; c__Bacteroidia; o__Cytophagales; f__Spirosomaceae; g__Dyadobacter; s__Dyadobacter fermentans
ASV367	0	0	0	0	110	74	89	78	d__Bacteria; p__Acidobacteriota; c__Blastocatellia; o__Pyrinomonadales; f__Pyrinomonadaceae; g__RB41; s__uncultured bacterium
ASV368	0	0	0	0	45	50	130	126	d__Bacteria; p__Proteobacteria; c__Gammaproteobacteria; o__Burkholderiales; f__Nitrosomonadaceae; g__MND1; s__uncultured bacterium
ASV369	0	0	0	0	0	0	36	0	Unclassified
ASV370	0	0	0	0	25	26	0	0	d__Bacteria; p__Cyanobacteria; c__Cyanobacteriia; o__Cyanobacteriales
ASV371	0	0	0	0	0	54	0	0	d__Bacteria; p__Gemmatimonadota; c__Gemmatimonadetes; o__Gemmatimonadales; f__Gemmatimonadaceae; g__Gemmatimonas
ASV372	0	0	0	0	36	0	0	19	d__Bacteria; p__Actinobacteriota
ASV373	18	0	60	68	0	0	0	0	d__Bacteria; p__Actinobacteriota; c__Actinobacteria; o__Frankiales; f__Frankiaceae; g__Jatrophihabitans
ASV374	80	26	35	96	0	0	0	0	d__Bacteria; p__Chloroflexi; c__Ktedonobacteria; o__Ktedonobacterales; f__Ktedonobacteraceae; g__HSB OF53-F07; s__uncultured bacterium
ASV375	0	0	0	0	0	0	52	30	d__Bacteria; p__Actinobacteriota; c__Thermoleophilia; o__Solirubrobacterales; f__Solirubrobacteraceae; g__Solirubrobacter; s__metagenome
ASV376	0	0	0	0	53	35	49	108	d__Bacteria; p__Acidobacteriota; c__Thermoanaerobaculia; o__Thermoanaerobaculales; f__Thermoanaerobaculaceae; g__Subgroup 10; s__uncultured bacterium
ASV377	113	86	84	92	0	0	0	0	d__Bacteria; p__Acidobacteriota; c__Acidobacteriae; o__Acidobacteriales; f__Acidobacteriaceae (Subgroup 1); g__uncultured; s__uncultured bacterium
ASV378	62	33	74	38	0	0	0	0	d__Bacteria; p__Planctomycetota; c__Phycisphaerae; o__Tepidisphaerales; f__Tepidisphaeraceae; g__Tepidisphaera; s__uncultured bacterium
ASV379	0	0	19	17	0	0	0	0	d__Bacteria; p__Cyanobacteria; c__Cyanobacteriia; o__Cyanobacteriales
ASV380	0	0	0	0	0	6	9	0	d__Bacteria; p__Cyanobacteria; c__Vampirivibrionia; o__Vampirovibrionales; f__Vampirovibrionaceae; g__Vampirovibrio
ASV381	0	0	0	0	0	11	0	0	d__Bacteria; p__Verrucomicrobiota; c__Verrucomicrobiae; o__Chthoniobacterales; f__Chthoniobacteraceae; g__Candidatus Udaeobacter
ASV382	11	10	18	0	0	0	0	0	d__Bacteria; p__Gemmatimonadota; c__Gemmatimonadetes; o__Gemmatimonadales; f__Gemmatimonadaceae; g__uncultured; s__uncultured Gemmatimonadetes bacterium
ASV383	0	0	0	0	85	40	17	61	d__Bacteria; p__Acidobacteriota; c__Vicinamibacteria; o__Vicinamibacterales; f__Vicinamibacteraceae; g__uncultured; s__uncultured bacterium
ASV384	0	0	34	0	0	15	0	0	d__Bacteria; p__Proteobacteria; c__Alphaproteobacteria; o__Micropepsales; f__Micropepsaceae; g__uncultured; s__metagenome
ASV385	0	0	0	0	42	32	14	21	d__Bacteria; p__Acidobacteriota; c__Blastocatellia; o__Blastocatellales; f__Blastocatellaceae; g__JGI 0001001-H03
ASV386	0	37	23	20	0	0	0	0	d__Bacteria; p__Proteobacteria; c__Gammaproteobacteria; o__Ectothiorhodospirales; f__Thioalkalispiraceae; g__Thiohalophilus
ASV387	85	83	49	59	0	0	0	0	Unclassified
ASV388	0	32	40	0	0	0	0	0	d__Bacteria; p__Actinobacteriota; c__Actinobacteria; o__Micrococcales; f__Microbacteriaceae; g__Lysinimonas
ASV389	10	22	6	9	0	0	0	0	d__Bacteria; p__Bacteroidota; c__Bacteroidia; o__Chitinophagales; f__Chitinophagaceae; g__uncultured; s__uncultured bacterium
ASV390	0	26	112	29	0	0	0	0	d__Bacteria; p__Proteobacteria; c__Gammaproteobacteria; o__Burkholderiales; f__Oxalobacteraceae; g__Massilia
ASV391	126	38	55	45	0	0	0	0	d__Bacteria; p__Acidobacteriota; c__Acidobacteriae; o__Acidobacteriales; f__Acidobacteriaceae (Subgroup 1); g__Granulicella
ASV392	50	79	57	69	0	0	0	0	d__Bacteria; p__Firmicutes; c__Bacilli; o__Bacillales; f__Planococcaceae; g__Planococcus
ASV393	0	19	0	0	0	0	0	0	d__Bacteria; p__Myxococcota; c__Polyangia; o__Haliangiales; f__Haliangiaceae; g__Haliangium; s__uncultured bacterium
ASV394	0	0	0	0	26	20	0	0	d__Bacteria; p__Gemmatimonadota; c__Gemmatimonadetes; o__Gemmatimonadales; f__Gemmatimonadaceae; g__uncultured
ASV395	21	30	68	39	0	0	0	0	d__Bacteria; p__Proteobacteria; c__Gammaproteobacteria; o__Xanthomonadales; f__Rhodanobacteraceae; g__Mizugakiibacter; s__uncultured Xanthomonadaceae bacterium
ASV396	0	0	0	0	0	27	0	0	d__Bacteria; p__Gemmatimonadota; c__Gemmatimonadetes; o__Gemmatimonadales; f__Gemmatimonadaceae; g__uncultured; s__uncultured bacterium
ASV397	88	73	50	0	0	0	0	0	d__Bacteria; p__Bacteroidota; c__Bacteroidia; o__Chitinophagales; f__Chitinophagaceae; g__uncultured; s__uncultured Bacteroidetes bacterium
ASV398	66	112	43	45	0	0	0	0	d__Bacteria; p__Firmicutes; c__Thermincolia; o__Carboxydocellales; f__Carboxydocellaceae; g__Carboxydocella; s__Carboxydocella thermautotrophica
ASV399	0	0	0	0	39	30	81	71	d__Bacteria; p__Acidobacteriota; c__Vicinamibacteria; o__Vicinamibacterales; f__Vicinamibacteraceae; g__Luteitalea; s__uncultured bacterium
ASV400	13	13	39	40	0	0	0	0	d__Bacteria; p__Planctomycetota; c__Phycisphaerae; o__Tepidisphaerales; f__Tepidisphaeraceae; g__Tepidisphaera; s__uncultured bacterium
ASV401	0	0	0	0	55	49	87	40	d__Bacteria; p__Proteobacteria; c__Gammaproteobacteria; o__Burkholderiales; f__Nitrosomonadaceae; g__MND1; s__uncultured bacterium
ASV402	0	0	0	0	29	19	17	8	d__Bacteria; p__Acidobacteriota; c__Vicinamibacteria; o__Vicinamibacterales; f__Vicinamibacteraceae; g__Luteitalea
ASV403	0	0	0	0	50	90	49	26	d__Bacteria; p__Acidobacteriota; c__Acidobacteriae; o__Bryobacterales; f__Bryobacteraceae; g__Bryobacter; s__uncultured bacterium
ASV404	26	28	95	38	0	25	15	0	d__Bacteria; p__Proteobacteria; c__Alphaproteobacteria; o__Caulobacterales; f__Caulobacteraceae; g__Phenylobacterium; s__uncultured bacterium
ASV405	0	0	0	0	0	34	32	0	d__Bacteria; p__Actinobacteriota; c__Actinobacteria; o__Streptomycetales; f__Streptomycetaceae; g__Streptomyces
ASV406	40	187	0	33	0	0	0	0	d__Bacteria; p__Proteobacteria; c__Gammaproteobacteria; o__Acidithiobacillales; f__Acidithiobacillaceae; g__KCM-B-112; s__uncultured bacterium
ASV407	0	0	0	0	70	37	0	80	d__Bacteria; p__Acidobacteriota; c__Vicinamibacteria; o__Vicinamibacterales; f__Vicinamibacteraceae; g__uncultured
ASV408	0	0	0	0	7	25	0	0	d__Bacteria; p__Gemmatimonadota; c__Longimicrobia; o__Longimicrobiales; f__Longimicrobiaceae; g__YC-ZSS-LKJ147; s__uncultured bacterium
ASV409	0	18	38	0	0	0	0	0	d__Bacteria; p__Actinobacteriota; c__Thermoleophilia; o__Gaiellales; f__Gaiellaceae; g__Gaiella; s__uncultured bacterium
ASV410	0	0	0	0	0	10	0	0	d__Bacteria; p__Myxococcota; c__Polyangia; o__Polyangiales; f__Sandaracinaceae; g__Sandaracinus; s__uncultured bacterium
ASV411	0	0	0	0	27	60	19	48	d__Bacteria; p__Planctomycetota; c__Planctomycetes; o__Pirellulales; f__Pirellulaceae; g__uncultured; s__uncultured bacterium
ASV412	0	0	0	0	11	18	11	14	d__Bacteria; p__Actinobacteriota; c__Thermoleophilia; o__Gaiellales; f__Gaiellaceae; g__Gaiella; s__uncultured bacterium
ASV413	0	0	0	0	0	21	0	0	d__Bacteria; p__Proteobacteria; c__Alphaproteobacteria; o__Sphingomonadales; f__Sphingomonadaceae; g__Sphingomonas
ASV414	59	64	46	50	0	0	0	0	d__Bacteria; p__Chloroflexi; c__Ktedonobacteria; o__Ktedonobacterales; f__Ktedonobacteraceae; g__HSB OF53-F07
ASV415	0	0	0	0	66	50	64	75	d__Bacteria; p__Acidobacteriota; c__Thermoanaerobaculia; o__Thermoanaerobaculales; f__Thermoanaerobaculaceae; g__Subgroup 10; s__uncultured bacterium
ASV416	12	7	24	12	0	0	0	0	d__Bacteria; p__Proteobacteria; c__Alphaproteobacteria; o__Sphingomonadales; f__Sphingomonadaceae; g__Sphingomonas; s__uncultured bacterium
ASV417	43	77	30	18	0	0	0	0	d__Bacteria; p__Chloroflexi; c__Anaerolineae; o__Thermoflexales; f__Thermoflexaceae; g__Thermoflexus; s__uncultured bacterium
ASV418	14	22	14	0	0	17	37	23	d__Bacteria
ASV419	0	0	0	0	33	39	56	34	d__Bacteria; p__Proteobacteria; c__Alphaproteobacteria; o__Sphingomonadales; f__Sphingomonadaceae; g__Sphingomonas
ASV420	0	93	0	89	0	0	0	0	d__Bacteria; p__Firmicutes; c__Bacilli; o__Paenibacillales; f__Paenibacillaceae; g__Paenibacillus
ASV421	0	0	0	4	30	41	111	75	d__Bacteria
ASV422	0	0	0	0	68	71	166	30	Unclassified
ASV423	0	0	0	0	25	30	18	23	d__Bacteria; p__Gemmatimonadota; c__Gemmatimonadetes; o__Gemmatimonadales; f__Gemmatimonadaceae; g__uncultured; s__uncultured bacterium
ASV424	0	0	0	0	15	18	28	16	d__Bacteria; p__Proteobacteria; c__Alphaproteobacteria; o__Rhizobiales; f__Beijerinckiaceae; g__Methylobacterium-Methylorubrum
ASV425	0	0	0	0	0	5	3	0	d__Bacteria; p__Chloroflexi; c__Chloroflexia; o__Chloroflexales; f__Roseiflexaceae; g__uncultured; s__uncultured Chloroflexi bacterium
ASV426	0	0	0	0	0	32	0	0	d__Bacteria; p__Gemmatimonadota; c__Gemmatimonadetes; o__Gemmatimonadales; f__Gemmatimonadaceae; g__Gemmatimonas
ASV427	0	0	0	0	70	72	88	82	d__Bacteria; p__Gemmatimonadota; c__Gemmatimonadetes; o__Gemmatimonadales; f__Gemmatimonadaceae; g__uncultured; s__uncultured bacterium
ASV428	0	0	0	0	51	51	59	23	Unclassified
ASV429	0	0	0	0	0	0	0	20	d__Bacteria
ASV430	136	53	63	67	0	0	0	0	d__Bacteria; p__Acidobacteriota; c__Acidobacteriae; o__Acidobacteriales; f__Acidobacteriaceae (Subgroup 1); g__uncultured
ASV431	0	0	0	0	0	36	0	0	d__Bacteria; p__Bacteroidota; c__Bacteroidia; o__Chitinophagales; f__Chitinophagaceae; g__Flavisolibacter; s__uncultured bacterium
ASV432	0	7	0	0	0	30	0	0	d__Bacteria; p__Bacteroidota; c__Bacteroidia; o__Chitinophagales; f__Chitinophagaceae; g__uncultured; s__uncultured bacterium
ASV433	0	0	0	0	17	41	34	21	d__Bacteria; p__Proteobacteria; c__Alphaproteobacteria; o__Dongiales; f__Dongiaceae; g__Dongia; s__uncultured bacterium
ASV434	0	0	0	0	21	16	8	26	d__Bacteria
ASV435	24	61	82	61	0	0	0	0	d__Bacteria; p__Gemmatimonadota; c__Gemmatimonadetes; o__Gemmatimonadales; f__Gemmatimonadaceae; g__Gemmatimonas; s__uncultured Gemmatimonas sp.
ASV436	0	0	15	12	0	0	0	0	d__Bacteria; p__Proteobacteria; c__Alphaproteobacteria; o__Thalassobaculales; f__Oceanibaculaceae; g__Oceanibaculum; s__uncultured bacterium
ASV437	0	0	0	0	11	23	12	21	d__Bacteria; p__Actinobacteriota; c__Acidimicrobiia; o__Microtrichales; f__Microtrichaceae; g__Sva0996 marine group; s__uncultured bacterium
ASV438	0	65	97	62	0	0	0	0	d__Bacteria; p__Proteobacteria; c__Gammaproteobacteria; o__Xanthomonadales; f__Rhodanobacteraceae; g__Dyella
ASV439	0	0	0	0	156	46	0	87	d__Bacteria; p__Acidobacteriota; c__Blastocatellia; o__Pyrinomonadales; f__Pyrinomonadaceae; g__RB41; s__uncultured Acidobacteria bacterium
ASV440	0	0	0	0	22	21	47	22	d__Bacteria; p__Chloroflexi; c__Chloroflexia; o__Chloroflexales; f__Roseiflexaceae; g__uncultured; s__uncultured bacterium
ASV441	0	0	0	0	79	64	81	106	d__Bacteria; p__Acidobacteriota; c__Blastocatellia; o__Pyrinomonadales; f__Pyrinomonadaceae; g__RB41; s__uncultured Acidobacteriaceae bacterium
ASV442	0	0	50	0	45	52	0	32	d__Bacteria; p__Verrucomicrobiota; c__Verrucomicrobiae; o__Chthoniobacterales; f__Chthoniobacteraceae; g__Candidatus Udaeobacter; s__uncultured bacterium
ASV443	48	64	62	59	0	0	0	0	d__Bacteria; p__Proteobacteria; c__Alphaproteobacteria; o__Azospirillales; f__Azospirillaceae; g__Azospirillum
ASV444	0	0	19	0	0	25	22	14	d__Bacteria; p__Myxococcota; c__Myxococcia; o__Myxococcales; f__Myxococcaceae; g__P3OB-42
ASV445	0	0	0	0	68	0	117	37	d__Bacteria
ASV446	0	0	0	0	0	8	0	0	d__Bacteria; p__Firmicutes; c__Bacilli; o__Bacillales
ASV447	0	0	11	0	0	0	0	0	d__Bacteria; p__Proteobacteria; c__Gammaproteobacteria; o__Salinisphaerales; f__Solimonadaceae; g__Alkanibacter
ASV448	49	38	0	0	0	0	0	0	d__Bacteria; p__Acidobacteriota; c__Acidobacteriae; o__Acidobacteriales; f__Acidobacteriaceae (Subgroup 1); g__uncultured
ASV449	30	25	48	29	0	0	0	0	d__Bacteria; p__Chloroflexi; c__Ktedonobacteria; o__Ktedonobacterales; f__Ktedonobacteraceae; g__HSB OF53-F07
ASV450	66	68	64	46	0	0	0	0	d__Bacteria; p__Proteobacteria; c__Gammaproteobacteria; o__Xanthomonadales; f__Rhodanobacteraceae; g__Rhodanobacter; s__uncultured Xanthomonadaceae bacterium
ASV451	0	0	31	11	0	0	0	0	d__Bacteria; p__Bacteroidota; c__Bacteroidia; o__Chitinophagales; f__Chitinophagaceae; g__Edaphobaculum
ASV452	0	0	0	0	0	26	28	38	d__Bacteria; p__Proteobacteria; c__Alphaproteobacteria; o__Rhizobiales; f__Methyloligellaceae; g__uncultured; s__uncultured bacterium
ASV453	133	70	47	0	0	0	0	0	d__Bacteria; p__Proteobacteria; c__Gammaproteobacteria; o__Burkholderiales; f__Oxalobacteraceae; g__Massilia; s__uncultured bacterium
ASV454	0	0	0	0	0	0	10	0	d__Bacteria; p__Actinobacteriota; c__Thermoleophilia; o__Solirubrobacterales; f__Solirubrobacteraceae; g__Conexibacter; s__uncultured bacterium
ASV455	0	0	0	0	52	50	69	35	d__Bacteria; p__Chloroflexi; c__Anaerolineae; o__Anaerolineales; f__Anaerolineaceae; g__uncultured
ASV456	14	24	28	22	0	0	0	0	d__Bacteria; p__Actinobacteriota; c__Actinobacteria; o__Frankiales; f__Nakamurellaceae; g__Nakamurella; s__metagenome
ASV457	33	39	80	102	0	0	0	0	d__Bacteria; p__Cyanobacteria; c__Cyanobacteriia; o__Cyanobacteriales
ASV458	0	0	0	0	0	11	0	0	d__Bacteria; p__Gemmatimonadota; c__Gemmatimonadetes; o__Gemmatimonadales; f__Gemmatimonadaceae; g__uncultured; s__uncultured bacterium
ASV459	0	0	0	0	57	47	53	27	d__Bacteria; p__Actinobacteriota; c__Rubrobacteria; o__Rubrobacterales; f__Rubrobacteriaceae; g__Rubrobacter; s__uncultured bacterium
ASV460	0	0	0	0	0	33	0	0	d__Bacteria; p__Proteobacteria; c__Alphaproteobacteria; o__Rhizobiales; f__Xanthobacteraceae; g__uncultured
ASV461	0	0	0	0	112	45	59	92	d__Bacteria; p__Acidobacteriota; c__Vicinamibacteria; o__Vicinamibacterales; f__Vicinamibacteraceae; g__Luteitalea
ASV462	0	0	0	0	0	19	3	0	d__Bacteria; p__Gemmatimonadota; c__Longimicrobia; o__Longimicrobiales; f__Longimicrobiaceae; g__YC-ZSS-LKJ147; s__uncultured bacterium
ASV463	0	0	0	0	0	6	0	0	d__Bacteria; p__Chloroflexi; c__Chloroflexia; o__Thermomicrobiales; f__Thermomicrobiaceae; g__Nitrolancea; s__uncultured bacterium
ASV464	13	6	28	44	0	0	0	0	d__Bacteria; p__Planctomycetota; c__Planctomycetes; o__Pirellulales; f__Pirellulaceae; g__Pirellula; s__uncultured bacterium
ASV465	83	38	54	48	0	0	0	0	d__Bacteria; p__Chloroflexi; c__Ktedonobacteria; o__Ktedonobacterales; f__Ktedonobacteraceae; g__HSB OF53-F07
ASV466	0	0	0	0	37	34	23	37	d__Bacteria; p__Chloroflexi; c__Chloroflexia; o__Thermomicrobiales; f__Thermomicrobiaceae; g__Nitrolancea; s__uncultured bacterium
ASV467	0	0	0	0	39	29	38	42	d__Bacteria; p__Acidobacteriota; c__Vicinamibacteria; o__Vicinamibacterales; f__Vicinamibacteraceae; g__Luteitalea
ASV468	13	5	37	10	0	0	0	0	d__Bacteria; p__Firmicutes; c__Clostridia; o__Peptostreptococcales-Tissierellales; f__Fusibacteraceae; g__Fusibacter; s__uncultured bacterium
ASV469	0	19	0	10	0	0	0	0	d__Bacteria; p__Proteobacteria; c__Gammaproteobacteria; o__Diplorickettsiales; f__Diplorickettsiaceae; g__Aquicella; s__uncultured bacterium
ASV470	0	0	0	0	56	81	28	23	d__Bacteria; p__Gemmatimonadota; c__Gemmatimonadetes; o__Gemmatimonadales; f__Gemmatimonadaceae; g__uncultured
ASV471	0	0	0	0	29	45	35	45	d__Bacteria; p__Actinobacteriota; c__Thermoleophilia; o__Gaiellales; f__Gaiellaceae; g__Gaiella; s__uncultured bacterium
ASV472	41	28	44	56	0	0	0	0	d__Bacteria; p__Chloroflexi; c__Ktedonobacteria; o__Ktedonobacterales; f__Ktedonobacteraceae; g__HSB OF53-F07; s__uncultured Ktedonobacter sp.
ASV473	22	32	25	23	0	0	0	0	d__Bacteria; p__Actinobacteriota; c__Actinobacteria; o__Catenulisporales; f__Actinospicaceae; g__Actinospica
ASV474	0	0	0	0	0	15	0	0	d__Bacteria; p__Bacteroidota; c__Bacteroidia; o__Cytophagales; f__Microscillaceae; g__uncultured; s__uncultured bacterium
ASV475	9	9	16	0	4	9	0	0	d__Bacteria
ASV476	0	0	16	0	0	0	0	0	d__Bacteria; p__Cyanobacteria; c__Cyanobacteriia; o__Cyanobacteriales; f__Chroococcidiopsaceae; g__uncultured; s__uncultured bacterium
ASV477	0	0	0	0	19	0	36	21	d__Bacteria; p__Firmicutes; c__Bacilli; o__Bacillales; f__Bacillaceae; g__Bacillus
ASV478	0	0	14	29	0	0	0	0	d__Bacteria; p__Planctomycetota; c__Planctomycetes; o__Pirellulales; f__Pirellulaceae; g__uncultured; s__uncultured bacterium
ASV479	0	0	0	0	132	44	0	0	Unclassified
ASV480	0	0	0	0	0	15	11	0	d__Bacteria; p__Actinobacteriota; c__Acidimicrobiia; o__Microtrichales
ASV481	0	0	0	0	15	0	0	0	d__Bacteria; p__Chloroflexi; c__Chloroflexia; o__Chloroflexales; f__Roseiflexaceae; g__uncultured; s__uncultured bacterium
ASV482	0	0	0	0	0	0	0	7	d__Bacteria; p__Proteobacteria; c__Alphaproteobacteria
ASV483	0	0	0	0	22	44	41	33	d__Bacteria; p__Bacteroidota; c__Bacteroidia; o__Chitinophagales; f__Chitinophagaceae; g__Flavitalea
ASV484	0	0	0	0	0	5	0	0	d__Bacteria; p__Proteobacteria; c__Gammaproteobacteria; o__Xanthomonadales; f__Xanthomonadaceae; g__Arenimonas; s__uncultured Xanthomonadaceae bacterium
ASV485	0	0	0	0	32	63	45	54	d__Bacteria; p__Actinobacteriota; c__Thermoleophilia; o__Gaiellales; f__Gaiellaceae; g__Gaiella; s__uncultured bacterium
ASV486	30	16	13	17	0	0	0	0	d__Bacteria
ASV487	58	78	37	73	0	0	0	0	Unclassified
ASV488	29	47	29	40	0	0	0	0	d__Bacteria; p__Proteobacteria; c__Alphaproteobacteria; o__Micropepsales; f__Micropepsaceae; g__uncultured
ASV489	0	0	0	0	46	25	0	34	d__Bacteria; p__Acidobacteriota; c__Vicinamibacteria; o__Vicinamibacterales; f__Vicinamibacteraceae; g__uncultured; s__uncultured bacterium
ASV490	32	18	14	0	0	0	0	0	d__Bacteria; p__Chloroflexi; c__Ktedonobacteria; o__Ktedonobacterales; f__Ktedonobacteraceae; g__HSB OF53-F07
ASV491	0	0	98	28	0	0	0	0	d__Bacteria; p__Cyanobacteria; c__Cyanobacteriia; o__Cyanobacteriales; f__Chroococcidiopsaceae; g__uncultured; s__uncultured bacterium
ASV492	54	43	73	0	0	0	0	0	d__Bacteria; p__Chloroflexi; c__Ktedonobacteria; o__Ktedonobacterales; f__Ktedonobacteraceae; g__HSB OF53-F07; s__uncultured Ktedonobacter sp.
ASV493	34	84	25	81	0	0	0	0	d__Bacteria; p__Desulfobacterota; c__Desulfobacteria
ASV494	0	0	0	0	92	47	52	55	d__Bacteria; p__Acidobacteriota; c__Blastocatellia; o__Pyrinomonadales; f__Pyrinomonadaceae; g__RB41; s__uncultured bacterium
ASV495	31	0	0	50	0	0	0	0	Unclassified
ASV496	0	0	0	0	0	15	0	18	d__Bacteria; p__Proteobacteria; c__Gammaproteobacteria; o__Pseudomonadales; f__Halomonadaceae
ASV497	0	0	0	0	0	37	23	0	d__Bacteria; p__Actinobacteriota; c__Thermoleophilia; o__Gaiellales; f__Gaiellaceae; g__Gaiella; s__uncultured bacterium
ASV498	0	0	0	0	29	30	34	18	d__Bacteria; p__Proteobacteria; c__Gammaproteobacteria; o__Burkholderiales; f__Nitrosomonadaceae; g__mle1-7; s__uncultured bacterium
ASV499	0	0	0	0	100	39	51	64	d__Bacteria; p__Acidobacteriota; c__Vicinamibacteria; o__Vicinamibacterales; f__Vicinamibacteraceae; g__Luteitalea; s__uncultured bacterium
ASV500	43	0	31	39	0	0	0	0	d__Bacteria; p__Firmicutes; c__Bacilli; o__Caldalkalibacillales; f__Caldalkalibacillaceae; g__Caldalkalibacillus
ASV501	0	0	0	0	38	43	54	35	d__Bacteria; p__Acidobacteriota; c__Vicinamibacteria; o__Vicinamibacterales; f__Vicinamibacteraceae; g__Vicinamibacter
ASV502	0	0	0	0	0	18	11	0	d__Bacteria; p__Firmicutes; c__Bacilli; o__Bacillales; f__Bacillaceae; g__Bacillus
ASV503	72	36	42	41	0	0	0	0	d__Bacteria; p__Acidobacteriota; c__Acidobacteriae; o__Acidobacteriales; f__Koribacteraceae; g__Candidatus Koribacter
ASV504	0	0	0	0	0	16	0	0	d__Bacteria; p__Proteobacteria; c__Alphaproteobacteria; o__Sphingomonadales; f__Sphingomonadaceae; g__Ellin6055; s__uncultured bacterium
ASV505	52	0	0	0	0	0	0	0	Unclassified
ASV506	61	126	91	27	0	0	0	0	d__Bacteria; p__Proteobacteria; c__Gammaproteobacteria; o__Burkholderiales; f__Oxalobacteraceae; g__Massilia; s__uncultured Telluria sp.
ASV507	0	0	0	0	3	0	0	0	d__Bacteria; p__Actinobacteriota; c__Actinobacteria; o__Frankiales; f__Acidothermaceae; g__Acidothermus; s__uncultured bacterium
ASV508	0	0	0	0	0	26	0	17	d__Bacteria; p__Actinobacteriota; c__Acidimicrobiia; o__Microtrichales
ASV509	0	0	0	0	18	0	37	0	d__Bacteria; p__Proteobacteria; c__Alphaproteobacteria; o__Dongiales; f__Dongiaceae; g__Dongia; s__uncultured bacterium
ASV510	0	0	0	0	42	60	0	0	d__Bacteria; p__Actinobacteriota; c__Actinobacteria; o__Micromonosporales; f__Micromonosporaceae; g__Micromonospora
ASV511	0	0	0	0	0	0	126	0	d__Bacteria; p__Acidobacteriota
ASV512	0	0	0	0	50	29	20	33	d__Bacteria
ASV513	0	0	0	0	97	48	48	144	d__Bacteria; p__Acidobacteriota; c__Vicinamibacteria; o__Vicinamibacterales; f__Vicinamibacteraceae; g__Luteitalea; s__uncultured bacterium
ASV514	14	20	15	47	0	0	0	0	d__Bacteria; p__Firmicutes; c__Bacilli; o__Alicyclobacillales; f__Alicyclobacillaceae; g__Tumebacillus; s__uncultured bacterium
ASV515	0	0	0	0	78	47	85	154	d__Bacteria; p__Acidobacteriota; c__Vicinamibacteria; o__Vicinamibacterales; f__Vicinamibacteraceae; g__uncultured; s__uncultured Acidobacteria bacterium
ASV516	0	0	0	0	0	5	0	0	d__Bacteria; p__Planctomycetota; c__Planctomycetes; o__Pirellulales; f__Pirellulaceae; g__Pirellula; s__uncultured bacterium
ASV517	46	44	137	38	0	0	0	0	d__Bacteria; p__Proteobacteria; c__Alphaproteobacteria; o__Sphingomonadales; f__Sphingomonadaceae; g__Sphingomonas; s__Sphingomonas mali
ASV518	20	41	41	43	0	0	0	0	Unclassified
ASV519	0	0	0	0	0	22	21	0	d__Bacteria; p__Actinobacteriota; c__Actinobacteria; o__Frankiales; f__Geodermatophilaceae; g__Geodermatophilus
ASV520	0	0	0	0	0	0	14	0	d__Bacteria; p__Proteobacteria; c__Gammaproteobacteria; o__Burkholderiales; f__Rhodocyclaceae; g__Sulfuritalea
ASV521	0	0	0	0	0	0	1	0	d__Bacteria; p__Proteobacteria; c__Alphaproteobacteria; o__Rhodospirillales; f__Magnetospiraceae; g__uncultured; s__uncultured bacterium
ASV522	0	0	0	0	0	42	0	0	d__Bacteria; p__Actinobacteriota; c__Actinobacteria; o__Corynebacteriales; f__Mycobacteriaceae; g__Mycobacterium
ASV523	0	0	81	0	0	0	0	0	d__Bacteria; p__Gemmatimonadota; c__Gemmatimonadetes; o__Gemmatimonadales; f__Gemmatimonadaceae; g__Gemmatimonas; s__uncultured bacterium
ASV524	114	78	47	56	0	0	0	0	d__Bacteria; p__Acidobacteriota; c__Acidobacteriae; o__Acidobacteriales; f__Acidobacteriaceae (Subgroup 1); g__uncultured
ASV525	0	0	0	0	91	42	32	29	d__Bacteria; p__Acidobacteriota; c__Blastocatellia; o__Pyrinomonadales; f__Pyrinomonadaceae; g__RB41; s__uncultured Acidobacteria bacterium
ASV526	45	71	86	53	0	0	0	0	d__Bacteria; p__Gemmatimonadota; c__Gemmatimonadetes; o__Gemmatimonadales; f__Gemmatimonadaceae; g__uncultured; s__uncultured bacterium
ASV527	29	28	45	60	0	0	0	0	d__Bacteria; p__Chloroflexi; c__Ktedonobacteria; o__Ktedonobacterales; f__Ktedonobacteraceae; g__HSB OF53-F07; s__uncultured bacterium
ASV528	0	0	65	56	0	0	0	0	d__Bacteria; p__Proteobacteria; c__Alphaproteobacteria; o__Rhizobiales; f__Rhizobiaceae; g__Mesorhizobium
ASV529	0	0	0	0	0	18	26	28	d__Bacteria; p__Acidobacteriota; c__Acidobacteriae; o__Acidobacteriales; f__Koribacteraceae; g__Candidatus Koribacter; s__uncultured bacterium
ASV530	0	0	0	0	41	0	33	53	d__Bacteria; p__Proteobacteria; c__Alphaproteobacteria; o__Rhizobiales; f__Xanthobacteraceae; g__uncultured; s__uncultured Alphaproteobacteria bacterium
ASV531	197	41	113	0	0	0	0	0	Unclassified
ASV532	0	0	0	0	0	21	0	0	d__Bacteria; p__Planctomycetota; c__Planctomycetes; o__Isosphaerales; f__Isosphaeraceae; g__uncultured; s__uncultured bacterium
ASV533	0	0	0	0	0	8	0	0	d__Bacteria; p__Actinobacteriota; c__Actinobacteria; o__Micrococcales; f__Intrasporangiaceae; g__Pedococcus-Phycicoccus
ASV534	46	75	30	47	0	0	0	0	d__Bacteria; p__Synergistota; c__Synergistia; o__Synergistales; f__Synergistaceae
ASV535	47	25	216	130	0	0	0	0	d__Bacteria; p__Cyanobacteria; c__Cyanobacteriia; o__Cyanobacteriales; f__Phormidiaceae
ASV536	23	76	0	31	0	0	0	0	d__Bacteria; p__Chloroflexi; c__Ktedonobacteria; o__Ktedonobacterales; f__Ktedonobacteraceae; g__1921-3; s__uncultured Ktedonobacter sp.
ASV537	0	0	0	0	0	63	0	63	d__Bacteria; p__Actinobacteriota; c__Thermoleophilia; o__Gaiellales; f__Gaiellaceae; g__Gaiella; s__uncultured bacterium
ASV538	0	0	0	0	0	32	41	40	d__Bacteria; p__Gemmatimonadota; c__Gemmatimonadetes; o__Gemmatimonadales; f__Gemmatimonadaceae; g__uncultured
ASV539	3	4	14	9	0	0	0	0	d__Bacteria; p__Bacteroidota; c__Bacteroidia; o__Sphingobacteriales; f__Sphingobacteriaceae; g__Pedobacter
ASV540	0	0	0	0	23	0	0	28	d__Bacteria
ASV541	61	0	0	0	0	0	0	0	d__Bacteria; p__Acidobacteriota; c__Acidobacteriae; o__Acidobacteriales; f__Acidobacteriaceae (Subgroup 1)
ASV542	0	0	0	0	73	40	66	26	d__Bacteria; p__Actinobacteriota; c__Actinobacteria; o__Micrococcales; f__Intrasporangiaceae; g__Intrasporangium
ASV543	0	0	0	0	18	25	0	16	d__Bacteria; p__Acidobacteriota; c__Vicinamibacteria; o__Vicinamibacterales; f__Vicinamibacteraceae; g__Luteitalea; s__uncultured bacterium
ASV544	0	0	0	0	0	5	6	0	d__Bacteria; p__Firmicutes; c__Clostridia; o__Oscillospirales; f__Oscillospiraceae; g__uncultured; s__uncultured Clostridiaceae bacterium
ASV545	0	0	0	0	0	46	0	37	d__Bacteria; p__Acidobacteriota; c__Blastocatellia; o__Pyrinomonadales; f__Pyrinomonadaceae; g__RB41; s__uncultured bacterium
ASV546	28	28	47	42	0	0	0	0	d__Bacteria; p__Chloroflexi; c__Ktedonobacteria; o__Ktedonobacterales; f__Ktedonobacteraceae; g__1921-2; s__uncultured bacterium
ASV547	0	0	0	0	0	11	21	20	d__Bacteria; p__Acidobacteriota
ASV548	0	0	0	0	61	28	0	88	d__Bacteria; p__Nitrospirota; c__Nitrospiria; o__Nitrospirales; f__Nitrospiraceae; g__Nitrospira; s__uncultured bacterium
ASV549	0	0	37	107	0	0	0	0	d__Bacteria; p__Acidobacteriota
ASV550	0	0	0	0	0	48	0	0	d__Bacteria; p__Acidobacteriota; c__Blastocatellia; o__Pyrinomonadales; f__Pyrinomonadaceae; g__RB41; s__uncultured bacterium
ASV551	7	19	37	45	0	0	0	0	d__Bacteria; p__Proteobacteria; c__Alphaproteobacteria; o__Sphingomonadales; f__Sphingomonadaceae
ASV552	0	0	0	0	40	38	36	32	d__Bacteria; p__Acidobacteriota; c__Thermoanaerobaculia; o__Thermoanaerobaculales; f__Thermoanaerobaculaceae; g__Subgroup 10
ASV553	43	42	36	0	0	0	0	0	d__Bacteria; p__Verrucomicrobiota; c__Verrucomicrobiae; o__Opitutales; f__Opitutaceae; g__Opitutus
ASV554	24	27	25	15	0	0	0	0	d__Bacteria; p__Proteobacteria; c__Gammaproteobacteria; o__Diplorickettsiales; f__Diplorickettsiaceae; g__uncultured; s__metagenome
ASV555	41	24	35	52	0	0	0	0	d__Bacteria; p__Chloroflexi; c__Ktedonobacteria; o__Ktedonobacterales; f__Ktedonobacteraceae; g__HSB OF53-F07; s__uncultured Ktedonobacter sp.
ASV556	0	0	0	0	47	0	35	0	d__Bacteria; p__Chloroflexi; c__Anaerolineae; o__Anaerolineales; f__Anaerolineaceae
ASV557	49	58	39	44	0	0	0	0	d__Bacteria; p__Acidobacteriota; c__Acidobacteriae; o__Acidobacteriales; f__Koribacteraceae; g__Candidatus Koribacter; s__uncultured bacterium
ASV558	0	0	0	0	17	18	0	116	d__Bacteria; p__Gemmatimonadota; c__Gemmatimonadetes; o__Gemmatimonadales; f__Gemmatimonadaceae; g__uncultured; s__uncultured bacterium
ASV559	29	44	39	33	0	0	0	0	d__Bacteria; p__Actinobacteriota; c__Thermoleophilia; o__Gaiellales; f__Gaiellaceae; g__Gaiella; s__uncultured bacterium
ASV560	0	0	0	0	52	38	157	33	d__Bacteria; p__Chloroflexi; c__Anaerolineae; o__SBR1031; f__A4b; g__OLB13
ASV561	0	0	0	0	0	82	49	0	d__Bacteria; p__Proteobacteria; c__Alphaproteobacteria; o__Rhizobiales; f__Xanthobacteraceae; g__uncultured; s__uncultured bacterium
ASV562	61	79	38	45	0	0	0	0	d__Bacteria; p__Acidobacteriota; c__Thermoanaerobaculia; o__Thermoanaerobaculales; f__Thermoanaerobaculaceae; g__Subgroup 10; s__uncultured bacterium
ASV563	0	0	0	0	16	0	0	0	d__Bacteria; p__Acidobacteriota; c__Thermoanaerobaculia; o__Thermoanaerobaculales; f__Thermoanaerobaculaceae; g__Subgroup 10; s__uncultured bacterium
ASV564	29	43	34	18	0	0	0	0	d__Bacteria; p__Proteobacteria; c__Gammaproteobacteria; o__Burkholderiales; f__Nitrosomonadaceae; g__Ellin6067; s__uncultured beta proteobacterium
ASV565	78	33	216	42	0	0	0	0	d__Bacteria; p__Proteobacteria; c__Gammaproteobacteria; o__Burkholderiales; f__Comamonadaceae; g__Ideonella
ASV566	0	0	16	0	0	0	0	0	d__Bacteria; p__Acidobacteriota; c__Acidobacteriae; o__Acidobacteriales; f__Acidobacteriaceae (Subgroup 1); g__uncultured; s__uncultured Acidobacteria bacterium
ASV567	22	33	30	31	0	0	0	0	d__Bacteria; p__Proteobacteria; c__Alphaproteobacteria; o__Acetobacterales; f__Acetobacteraceae; g__uncultured; s__metagenome
ASV568	12	0	7	0	0	0	0	0	d__Bacteria; p__Planctomycetota; c__Planctomycetes; o__Gemmatales; f__Gemmataceae; g__Gemmata; s__uncultured bacterium
ASV569	36	39	34	35	0	0	0	0	d__Bacteria; p__Proteobacteria; c__Alphaproteobacteria; o__Rhizobiales; f__Xanthobacteraceae; g__Rhodoplanes; s__uncultured bacterium
ASV570	0	67	49	38	0	0	0	0	d__Bacteria; p__Actinobacteriota; c__Actinobacteria; o__Streptomycetales; f__Streptomycetaceae; g__Kitasatospora
ASV571	42	49	100	64	0	0	0	0	d__Bacteria; p__Proteobacteria; c__Gammaproteobacteria; o__Burkholderiales; f__Comamonadaceae; g__Ramlibacter
ASV572	0	0	0	0	0	0	14	0	Unclassified
ASV573	0	0	0	0	24	11	0	0	d__Bacteria; p__Gemmatimonadota; c__Gemmatimonadetes; o__Gemmatimonadales; f__Gemmatimonadaceae; g__Gemmatimonas; s__uncultured bacterium
ASV574	101	41	0	59	0	0	0	0	d__Bacteria; p__Acidobacteriota; c__Acidobacteriae; o__Acidobacteriales; f__Acidobacteriaceae (Subgroup 1); g__uncultured; s__uncultured bacterium
ASV575	0	0	0	0	0	0	7	0	d__Bacteria; p__Acidobacteriota; c__Vicinamibacteria; o__Vicinamibacterales; f__Vicinamibacteraceae
ASV576	22	59	30	0	0	0	0	0	d__Bacteria; p__Planctomycetota; c__Planctomycetes; o__Pirellulales; f__Pirellulaceae; g__uncultured
ASV577	0	0	0	0	0	80	21	38	d__Bacteria; p__Verrucomicrobiota; c__Verrucomicrobiae; o__Pedosphaerales; f__Pedosphaeraceae; g__Ellin517; s__uncultured bacterium
ASV578	3	9	33	33	0	0	0	0	d__Bacteria; p__Actinobacteriota; c__Actinobacteria; o__Micrococcales; f__Dermacoccaceae; g__Flexivirga; s__Flexivirga sp.
ASV579	0	24	14	25	0	0	0	0	d__Bacteria; p__Proteobacteria; c__Alphaproteobacteria; o__Rhizobiales; f__Rhizobiaceae; g__Mesorhizobium
ASV580	25	74	24	35	0	0	0	0	Unclassified
ASV581	0	87	0	134	0	0	0	0	d__Bacteria; p__Acidobacteriota; c__Acidobacteriae; o__Acidobacteriales; f__Acidobacteriaceae (Subgroup 1); g__uncultured
ASV582	75	39	0	68	0	0	0	0	d__Bacteria; p__Planctomycetota; c__Planctomycetes; o__Gemmatales; f__Gemmataceae; g__uncultured; s__uncultured planctomycete
ASV583	0	0	0	0	22	30	30	13	d__Bacteria; p__Proteobacteria; c__Alphaproteobacteria; o__Sphingomonadales; f__Sphingomonadaceae; g__Sphingomonas
ASV584	47	13	59	20	0	0	0	0	d__Bacteria; p__Verrucomicrobiota; c__Verrucomicrobiae; o__Pedosphaerales; f__Pedosphaeraceae; g__DEV008; s__metagenome
ASV585	0	0	0	0	0	19	12	0	d__Bacteria; p__Acidobacteriota; c__Acidobacteriae; o__Bryobacterales; f__Bryobacteraceae; g__Bryobacter; s__uncultured bacterium
ASV586	0	0	0	0	14	21	98	31	d__Bacteria
ASV587	0	0	0	0	65	0	21	74	d__Bacteria; p__Chloroflexi; c__Anaerolineae; o__Anaerolineales; f__Anaerolineaceae; g__uncultured; s__uncultured bacterium
ASV588	0	0	0	0	0	14	0	0	d__Bacteria; p__Gemmatimonadota; c__Longimicrobia; o__Longimicrobiales; f__Longimicrobiaceae; g__YC-ZSS-LKJ147; s__uncultured bacterium
ASV589	43	31	27	24	0	0	0	0	d__Bacteria; p__Planctomycetota; c__Planctomycetes; o__Gemmatales; f__Gemmataceae; g__uncultured
ASV590	0	0	0	0	29	0	0	0	d__Bacteria; p__Proteobacteria; c__Alphaproteobacteria; o__Rhizobiales; f__Xanthobacteraceae; g__uncultured
ASV591	35	30	22	20	0	0	0	0	d__Bacteria; p__Chloroflexi; c__Ktedonobacteria; o__Ktedonobacterales; f__Ktedonobacteraceae; g__Ktedonobacter
ASV592	62	36	18	46	0	0	0	0	Unclassified
ASV593	0	5	7	0	0	0	0	0	Unclassified
ASV594	0	0	0	0	0	0	7	0	d__Bacteria; p__Cyanobacteria; c__Cyanobacteriia; o__Leptolyngbyales; f__Leptolyngbyaceae; g__Phormidium CYN64; s__uncultured bacterium
ASV595	0	0	0	0	19	17	12	17	d__Bacteria; p__Acidobacteriota; c__Blastocatellia; o__Pyrinomonadales; f__Pyrinomonadaceae; g__RB41; s__uncultured bacterium
ASV596	0	0	0	0	23	35	29	16	d__Bacteria; p__Actinobacteriota; c__Thermoleophilia; o__Gaiellales; f__Gaiellaceae; g__Gaiella; s__uncultured bacterium
ASV597	0	13	27	0	0	0	0	0	d__Bacteria; p__Proteobacteria; c__Alphaproteobacteria; o__Micropepsales; f__Micropepsaceae; g__uncultured
ASV598	0	0	0	0	55	50	0	62	d__Bacteria; p__Proteobacteria; c__Gammaproteobacteria; o__Burkholderiales; f__Nitrosomonadaceae; g__MND1
ASV599	0	0	22	6	16	33	0	0	d__Bacteria; p__Actinobacteriota; c__Thermoleophilia; o__Solirubrobacterales; f__Solirubrobacteraceae
ASV600	33	51	72	21	0	0	0	0	d__Bacteria; p__Bacteroidota; c__Bacteroidia; o__Chitinophagales; f__Chitinophagaceae; g__Flavisolibacter; s__uncultured bacterium
ASV601	0	0	0	31	0	0	0	0	d__Bacteria; p__Proteobacteria; c__Gammaproteobacteria; o__Burkholderiales; f__Burkholderiaceae; g__Limnobacter; s__Limnobacter litoralis
ASV602	0	0	0	0	0	7	0	0	d__Bacteria; p__Proteobacteria; c__Gammaproteobacteria; o__Diplorickettsiales; f__Diplorickettsiaceae; g__Aquicella; s__uncultured bacterium
ASV603	0	0	0	0	44	27	0	0	d__Bacteria; p__Acidobacteriota; c__Thermoanaerobaculia; o__Thermoanaerobaculales; f__Thermoanaerobaculaceae; g__Subgroup 10; s__uncultured bacterium
ASV604	0	0	0	0	26	47	38	24	d__Bacteria; p__Proteobacteria; c__Alphaproteobacteria; o__Sphingomonadales; f__Sphingomonadaceae; g__Sphingomonas; s__uncultured Sphingomonas sp.
ASV605	0	0	0	0	3	16	0	0	d__Bacteria; p__Chloroflexi; c__Chloroflexia; o__Thermomicrobiales; f__Thermomicrobiaceae; g__Sphaerobacter
ASV606	0	0	0	0	36	42	75	70	d__Bacteria; p__Proteobacteria; c__Gammaproteobacteria; o__Burkholderiales; f__Nitrosomonadaceae; g__MND1
ASV607	0	0	0	0	8	0	12	19	d__Bacteria; p__Proteobacteria; c__Gammaproteobacteria; o__Burkholderiales; f__Nitrosomonadaceae; g__mle1-7
ASV608	0	0	0	0	43	63	50	54	d__Bacteria; p__Acidobacteriota; c__Vicinamibacteria; o__Vicinamibacterales; f__Vicinamibacteraceae; g__Luteitalea; s__uncultured bacterium
ASV609	5	0	0	6	0	0	0	0	d__Bacteria; p__Proteobacteria; c__Gammaproteobacteria; o__Salinisphaerales; f__Solimonadaceae; g__Polycyclovorans; s__uncultured bacterium
ASV610	0	0	0	0	0	0	5	0	d__Bacteria; p__Firmicutes; c__Limnochordia; o__Limnochordales; f__Limnochordaceae; g__Limnochorda; s__Limnochorda pilosa
ASV611	0	0	0	0	0	5	0	0	d__Bacteria; p__Proteobacteria; c__Alphaproteobacteria; o__Defluviicoccales; f__Defluviicoccaceae; g__Defluviicoccus; s__uncultured bacterium
ASV612	8	0	7	5	0	6	5	0	d__Bacteria; p__Deinococcota; c__Deinococci; o__Thermales; f__Thermaceae; g__Meiothermus; s__uncultured bacterium
ASV613	0	0	0	0	22	25	26	105	d__Bacteria; p__Desulfobacterota
ASV614	0	0	0	0	46	40	19	84	d__Bacteria; p__Acidobacteriota; c__Vicinamibacteria; o__Vicinamibacterales; f__Vicinamibacteraceae; g__uncultured; s__uncultured Acidobacteria bacterium
ASV615	0	0	0	0	0	0	12	0	d__Bacteria; p__Gemmatimonadota; c__Gemmatimonadetes; o__Gemmatimonadales; f__Gemmatimonadaceae; g__Gemmatimonas; s__uncultured bacterium
ASV616	0	0	0	0	0	0	79	24	d__Bacteria; p__Acidobacteriota
ASV617	0	6	0	0	0	0	12	0	d__Bacteria; p__Proteobacteria; c__Gammaproteobacteria; o__Burkholderiales; f__Nitrosomonadaceae; g__mle1-7; s__uncultured bacterium
ASV618	0	0	71	16	0	0	0	0	d__Bacteria; p__Bacteroidota; c__Bacteroidia; o__Cytophagales; f__Spirosomaceae; g__Dyadobacter; s__Dyadobacter fermentans DSM 18053
ASV619	0	0	0	0	35	44	91	75	d__Bacteria; p__Gemmatimonadota; c__Gemmatimonadetes; o__Gemmatimonadales; f__Gemmatimonadaceae; g__uncultured; s__uncultured bacterium
ASV620	0	0	0	0	32	43	24	16	d__Bacteria; p__Bacteroidota; c__Bacteroidia; o__Chitinophagales; f__Chitinophagaceae; g__Flavisolibacter
ASV621	21	59	36	25	0	0	0	0	d__Bacteria; p__Chloroflexi; c__Ktedonobacteria; o__Ktedonobacterales; f__Ktedonobacteraceae; g__Ktedonobacter
ASV622	9	27	19	10	0	0	0	0	d__Bacteria; p__Gemmatimonadota; c__Gemmatimonadetes; o__Gemmatimonadales; f__Gemmatimonadaceae; g__uncultured; s__uncultured bacterium
ASV623	0	0	0	0	42	44	68	59	d__Bacteria; p__Gemmatimonadota; c__Gemmatimonadetes; o__Gemmatimonadales; f__Gemmatimonadaceae; g__uncultured; s__uncultured bacterium
ASV624	0	0	0	0	44	34	23	28	d__Bacteria; p__Acidobacteriota; c__Blastocatellia; o__Blastocatellales; f__Blastocatellaceae; g__Aridibacter; s__uncultured bacterium
ASV625	8	0	17	21	0	0	0	0	d__Bacteria; p__Actinobacteriota; c__Thermoleophilia; o__Gaiellales; f__Gaiellaceae; g__Gaiella; s__uncultured bacterium
ASV626	0	0	0	34	0	0	0	0	d__Bacteria; p__Firmicutes; c__Bacilli; o__Paenibacillales; f__Paenibacillaceae; g__Paenibacillus
ASV627	0	84	58	65	0	0	0	0	d__Bacteria; p__Acidobacteriota; c__Acidobacteriae; o__Solibacterales; f__Solibacteraceae; g__Candidatus Solibacter; s__uncultured bacterium
ASV628	0	0	0	0	0	23	14	0	d__Bacteria; p__Proteobacteria; c__Alphaproteobacteria; o__Azospirillales; f__Azospirillaceae; g__Skermanella; s__uncultured bacterium
ASV629	0	0	0	0	39	20	23	0	d__Bacteria; p__Acidobacteriota; c__Vicinamibacteria; o__Vicinamibacterales; f__Vicinamibacteraceae; g__Luteitalea; s__uncultured bacterium
ASV630	0	0	0	0	51	0	0	0	d__Bacteria; p__Proteobacteria; c__Gammaproteobacteria; o__Burkholderiales; f__Nitrosomonadaceae; g__MND1; s__uncultured bacterium
ASV631	0	0	0	0	25	15	14	11	d__Bacteria; p__Planctomycetota; c__Planctomycetes; o__Gemmatales; f__Gemmataceae; g__Gemmata
ASV632	9	5	29	46	0	0	0	0	d__Bacteria; p__Cyanobacteria; c__Cyanobacteriia; o__Cyanobacteriales; f__Chroococcidiopsaceae; g__uncultured
ASV633	0	0	0	61	0	0	0	0	d__Bacteria; p__Actinobacteriota; c__Thermoleophilia; o__Solirubrobacterales; f__Solirubrobacteraceae; g__Conexibacter; s__uncultured bacterium
ASV634	59	73	15	51	0	0	0	0	d__Bacteria; p__Gemmatimonadota; c__Gemmatimonadetes; o__Gemmatimonadales; f__Gemmatimonadaceae; g__uncultured; s__uncultured bacterium
ASV635	0	0	0	83	0	0	0	0	d__Bacteria; p__Acidobacteriota; c__Acidobacteriae; o__Acidobacteriales
ASV636	15	27	0	11	0	0	0	0	d__Bacteria; p__Proteobacteria; c__Gammaproteobacteria; o__Gammaproteobacteria Incertae Sedis; f__Unknown Family; g__Acidibacter
ASV637	59	22	22	48	0	0	0	0	Unclassified
ASV638	0	0	0	0	0	22	0	0	d__Bacteria; p__Proteobacteria; c__Gammaproteobacteria; o__Salinisphaerales; f__Solimonadaceae; g__Alkanibacter; s__uncultured bacterium
ASV639	24	21	37	29	0	0	0	0	d__Bacteria; p__Chloroflexi; c__Ktedonobacteria; o__Ktedonobacterales; f__Ktedonobacteraceae; g__1921-3; s__uncultured Ktedonobacter sp.
ASV640	0	0	0	0	0	14	5	9	d__Bacteria; p__Planctomycetota; c__Planctomycetes; o__Pirellulales; f__Pirellulaceae; g__Pirellula; s__uncultured bacterium
ASV641	0	0	0	0	41	41	54	44	d__Bacteria; p__Proteobacteria; c__Gammaproteobacteria; o__Burkholderiales; f__Nitrosomonadaceae; g__GOUTA6; s__uncultured bacterium
ASV642	0	0	0	0	0	12	0	0	d__Bacteria; p__Bacteroidota; c__Bacteroidia; o__Chitinophagales; f__Chitinophagaceae; g__uncultured; s__uncultured bacterium
ASV643	0	19	0	0	0	0	0	0	d__Bacteria; p__Patescibacteria; c__Saccharimonadia; o__Saccharimonadales; f__Saccharimonadaceae
ASV644	0	24	16	9	0	16	0	8	d__Bacteria; p__Actinobacteriota; c__Acidimicrobiia; o__Acidimicrobiales; f__Acidimicrobiaceae; g__uncultured; s__uncultured bacterium
ASV645	0	0	0	0	0	0	19	0	d__Bacteria; p__Firmicutes; c__Bacilli; o__Bacillales; f__Bacillaceae; g__Bacillus
ASV646	15	27	21	22	0	0	0	0	d__Bacteria; p__Chloroflexi; c__Ktedonobacteria; o__Ktedonobacterales; f__Ktedonobacteraceae; g__HSB OF53-F07
ASV647	0	0	0	0	17	16	0	0	d__Bacteria; p__Gemmatimonadota; c__Gemmatimonadetes; o__Gemmatimonadales; f__Gemmatimonadaceae; g__uncultured
ASV648	0	0	31	0	0	20	0	0	d__Bacteria; p__Proteobacteria; c__Alphaproteobacteria; o__Rhizobiales; f__Rhizobiaceae; g__Allorhizobium-Neorhizobium-Pararhizobium-Rhizobium; s__Agrobacterium radiobacter
ASV649	0	0	0	0	30	17	33	19	d__Bacteria; p__Gemmatimonadota; c__Gemmatimonadetes; o__Gemmatimonadales; f__Gemmatimonadaceae; g__Gemmatimonas
ASV650	28	0	46	15	0	0	0	0	d__Bacteria; p__Chloroflexi; c__Ktedonobacteria; o__Ktedonobacterales; f__Ktedonobacteraceae; g__HSB OF53-F07; s__uncultured bacterium
ASV651	0	0	0	0	29	22	33	19	d__Bacteria; p__Verrucomicrobiota; c__Verrucomicrobiae; o__Opitutales; f__Opitutaceae; g__Opitutus
ASV652	59	33	33	57	0	0	0	0	d__Bacteria; p__Acidobacteriota; c__Acidobacteriae; o__Acidobacteriales
ASV653	0	0	0	0	23	37	23	35	d__Bacteria; p__Acidobacteriota; c__Thermoanaerobaculia; o__Thermoanaerobaculales; f__Thermoanaerobaculaceae; g__Subgroup 10; s__uncultured bacterium
ASV654	0	0	0	0	64	39	75	0	d__Bacteria; p__Actinobacteriota; c__Thermoleophilia; o__Gaiellales; f__Gaiellaceae; g__Gaiella; s__uncultured bacterium
ASV655	36	59	72	0	0	0	0	0	d__Bacteria; p__Firmicutes; c__Bacilli; o__Thermoactinomycetales; f__Thermoactinomycetaceae; g__uncultured; s__uncultured compost bacterium
ASV656	0	0	7	4	0	0	0	0	d__Bacteria; p__Bacteroidota; c__Bacteroidia; o__Sphingobacteriales; f__Sphingobacteriaceae; g__Mucilaginibacter; s__Mucilaginibacter sp. PAMC 26640
ASV657	0	0	0	0	0	23	0	0	Unclassified
ASV658	0	0	8	6	0	6	0	0	d__Bacteria; p__Actinobacteriota; c__Actinobacteria; o__Frankiales; f__Geodermatophilaceae; g__Blastococcus; s__uncultured bacterium
ASV659	0	0	0	0	0	7	0	0	d__Bacteria; p__Bacteroidota; c__Bacteroidia; o__Chitinophagales; f__Chitinophagaceae; g__Edaphobaculum
ASV660	33	42	0	22	0	0	0	0	d__Bacteria; p__Firmicutes; c__Clostridia; o__Caldicoprobacterales; f__Caldicoprobacteraceae; g__Caldicoprobacter
ASV661	0	0	0	0	0	0	10	0	d__Bacteria
ASV662	0	0	18	0	0	0	0	0	d__Bacteria; p__Actinobacteriota; c__Actinobacteria; o__Propionibacteriales; f__Nocardioidaceae; g__Marmoricola
ASV663	0	0	0	0	14	11	0	0	d__Bacteria; p__Acidobacteriota; c__Blastocatellia; o__Pyrinomonadales; f__Pyrinomonadaceae; g__RB41; s__uncultured bacterium
ASV664	0	0	0	0	28	42	29	0	d__Bacteria; p__Gemmatimonadota; c__Gemmatimonadetes; o__Gemmatimonadales; f__Gemmatimonadaceae; g__uncultured; s__uncultured bacterium
ASV665	0	0	0	0	0	42	56	51	d__Bacteria; p__Acidobacteriota; c__Blastocatellia; o__Pyrinomonadales; f__Pyrinomonadaceae; g__RB41; s__uncultured Acidobacteria bacterium
ASV666	21	0	0	0	0	0	0	0	d__Bacteria; p__Acidobacteriota; c__Acidobacteriae; o__Acidobacteriales; f__Acidobacteriaceae (Subgroup 1); g__uncultured; s__uncultured bacterium
ASV667	0	0	3	0	0	0	0	0	d__Bacteria; p__Actinobacteriota; c__Actinobacteria; o__Micrococcales; f__Microbacteriaceae; g__Humibacter
ASV668	47	33	29	31	0	0	0	0	d__Bacteria; p__Chloroflexi; c__Ktedonobacteria; o__Ktedonobacterales; f__Ktedonobacteraceae
ASV669	0	0	0	0	30	27	46	41	d__Bacteria; p__Proteobacteria; c__Alphaproteobacteria; o__Rhizobiales; f__Rhizobiales Incertae Sedis; g__Nordella; s__uncultured bacterium
ASV670	0	0	0	0	32	21	64	87	d__Bacteria; p__Verrucomicrobiota; c__Verrucomicrobiae; o__Pedosphaerales; f__Pedosphaeraceae; g__uncultured; s__uncultured bacterium
ASV671	33	0	0	48	0	0	0	0	d__Bacteria; p__Chloroflexi; c__Ktedonobacteria; o__Ktedonobacterales; f__Ktedonobacteraceae; g__HSB OF53-F07; s__uncultured Ktedonobacter sp.
ASV672	0	0	5	0	0	0	0	0	d__Bacteria; p__Bacteroidota; c__Bacteroidia; o__Sphingobacteriales; f__Sphingobacteriaceae; g__Pedobacter
ASV673	0	0	0	0	0	46	72	51	d__Bacteria; p__Proteobacteria; c__Gammaproteobacteria; o__Gammaproteobacteria Incertae Sedis; f__Unknown Family; g__Acidibacter; s__uncultured bacterium
ASV674	0	0	0	0	60	46	31	0	d__Bacteria; p__Acidobacteriota; c__Vicinamibacteria; o__Vicinamibacterales; f__Vicinamibacteraceae; g__Luteitalea; s__uncultured bacterium
ASV675	0	0	21	0	0	0	0	0	d__Bacteria; p__Myxococcota; c__Polyangia; o__Haliangiales; f__Haliangiaceae; g__Haliangium
ASV676	14	0	121	0	0	0	0	0	d__Bacteria; p__Proteobacteria; c__Gammaproteobacteria; o__Pseudomonadales; f__Moraxellaceae; g__uncultured; s__metagenome
ASV677	0	0	25	0	0	0	0	0	d__Bacteria; p__Planctomycetota; c__Planctomycetes; o__Isosphaerales; f__Isosphaeraceae; g__Singulisphaera; s__uncultured bacterium
ASV678	17	22	48	30	0	0	0	0	d__Bacteria; p__Gemmatimonadota; c__Gemmatimonadetes; o__Gemmatimonadales; f__Gemmatimonadaceae; g__uncultured; s__uncultured bacterium
ASV679	42	18	139	56	0	0	0	0	d__Bacteria; p__Bacteroidota; c__Bacteroidia; o__Cytophagales; f__Microscillaceae; g__uncultured
ASV680	0	0	0	0	29	12	19	13	d__Bacteria; p__Acidobacteriota
ASV681	0	0	0	0	13	22	36	9	d__Bacteria; p__Proteobacteria; c__Gammaproteobacteria; o__Pseudomonadales; f__Moraxellaceae; g__uncultured; s__metagenome
ASV682	19	23	18	26	0	0	0	0	d__Bacteria; p__Actinobacteriota; c__Acidimicrobiia; o__Acidimicrobiales; f__Acidimicrobiaceae; g__Acidimicrobium; s__uncultured bacterium
ASV683	116	30	18	190	0	0	0	0	d__Bacteria; p__Acidobacteriota; c__Acidobacteriae; o__Acidobacteriales; f__Acidobacteriaceae (Subgroup 1); g__uncultured; s__uncultured bacterium
ASV684	25	19	83	18	0	0	0	0	d__Bacteria; p__Proteobacteria; c__Gammaproteobacteria; o__Burkholderiales; f__Comamonadaceae; g__uncultured
ASV685	0	0	0	0	40	25	15	20	d__Bacteria; p__Planctomycetota; c__Planctomycetes; o__Gemmatales; f__Gemmataceae; g__uncultured; s__uncultured bacterium
ASV686	0	0	0	78	0	0	0	0	d__Bacteria; p__Chloroflexi; c__Ktedonobacteria; o__Ktedonobacterales; f__Ktedonobacteraceae; g__HSB OF53-F07; s__uncultured bacterium
ASV687	0	0	0	0	21	44	35	24	d__Bacteria; p__Proteobacteria; c__Alphaproteobacteria; o__Azospirillales; f__Azospirillaceae; g__Skermanella
ASV688	0	0	0	0	0	34	0	25	d__Bacteria; p__Actinobacteriota; c__Thermoleophilia; o__Gaiellales; f__Gaiellaceae; g__Gaiella; s__uncultured bacterium
ASV689	0	0	0	0	0	6	0	0	d__Bacteria; p__Bacteroidota; c__Bacteroidia; o__Cytophagales; f__Hymenobacteraceae; g__Pontibacter; s__uncultured bacterium
ASV690	0	0	0	0	13	0	26	0	d__Bacteria; p__Actinobacteriota; c__Actinobacteria; o__Micromonosporales; f__Micromonosporaceae; g__Hamadaea
ASV691	0	0	0	0	31	21	11	8	d__Bacteria; p__Gemmatimonadota; c__Gemmatimonadetes; o__Gemmatimonadales; f__Gemmatimonadaceae; g__Gemmatimonas; s__uncultured bacterium
ASV692	0	0	0	0	34	46	35	27	d__Bacteria; p__Actinobacteriota; c__Thermoleophilia; o__Gaiellales; f__Gaiellaceae; g__Gaiella; s__uncultured bacterium
ASV693	0	0	0	0	14	30	0	0	d__Bacteria; p__Proteobacteria; c__Alphaproteobacteria
ASV694	0	0	0	0	34	14	24	31	d__Bacteria; p__Gemmatimonadota; c__Gemmatimonadetes; o__Gemmatimonadales; f__Gemmatimonadaceae; g__uncultured; s__uncultured bacterium
ASV695	0	0	0	0	0	11	0	0	d__Bacteria; p__Proteobacteria; c__Gammaproteobacteria; o__Salinisphaerales; f__Solimonadaceae; g__Alkanibacter
ASV696	0	0	0	0	0	0	19	0	d__Bacteria; p__Proteobacteria; c__Alphaproteobacteria; o__Reyranellales; f__Reyranellaceae; g__uncultured; s__uncultured bacterium
ASV697	39	59	17	0	0	0	0	0	Unclassified
ASV698	0	0	0	0	0	20	0	12	d__Bacteria; p__Chloroflexi; c__Chloroflexia; o__Thermobaculales; f__Thermobaculaceae; g__Thermobaculum; s__uncultured bacterium
ASV699	39	79	12	25	0	0	0	0	d__Bacteria; p__Proteobacteria; c__Gammaproteobacteria; o__Xanthomonadales; f__Rhodanobacteraceae; g__Dyella; s__uncultured Dyella sp.
ASV700	4	0	12	0	0	0	0	0	d__Bacteria; p__Firmicutes; c__Bacilli; o__Bacillales; f__Bacillaceae; g__Bacillus
ASV701	0	0	0	0	0	9	0	0	d__Bacteria; p__Verrucomicrobiota; c__Verrucomicrobiae; o__Chthoniobacterales; f__Chthoniobacteraceae; g__Chthoniobacter; s__uncultured bacterium
ASV702	0	0	0	0	35	0	23	26	d__Bacteria; p__Acidobacteriota
ASV703	16	25	31	33	0	0	0	0	d__Bacteria; p__Firmicutes; c__Bacilli; o__Thermoactinomycetales; f__Thermoactinomycetaceae; g__Melghirimyces
ASV704	0	0	0	0	0	94	0	52	d__Bacteria
ASV705	0	0	10	0	0	0	0	0	d__Bacteria; p__Proteobacteria; c__Gammaproteobacteria; o__Gammaproteobacteria Incertae Sedis; f__Unknown Family; g__Acidibacter; s__uncultured bacterium
ASV706	0	0	0	0	0	21	0	0	d__Bacteria; p__Proteobacteria; c__Alphaproteobacteria; o__Sphingomonadales; f__Sphingomonadaceae; g__Sphingomonas; s__uncultured bacterium
ASV707	0	0	0	0	19	20	78	66	d__Bacteria; p__Proteobacteria; c__Gammaproteobacteria; o__Burkholderiales; f__Nitrosomonadaceae; g__mle1-7; s__uncultured bacterium
ASV708	22	45	0	0	0	0	0	0	d__Bacteria; p__Proteobacteria; c__Alphaproteobacteria; o__Rhizobiales; f__Xanthobacteraceae; g__uncultured; s__uncultured bacterium
ASV709	0	0	0	0	32	48	16	22	d__Bacteria; p__Gemmatimonadota; c__Gemmatimonadetes; o__Gemmatimonadales; f__Gemmatimonadaceae; g__uncultured; s__uncultured Gemmatimonadetes bacterium
ASV710	0	41	0	35	0	0	0	0	d__Bacteria; p__Actinobacteriota; c__Acidimicrobiia; o__Acidimicrobiales; f__Acidimicrobiales Incertae Sedis; g__Aciditerrimonas
ASV711	62	27	29	67	0	0	0	0	d__Bacteria
ASV712	0	0	6	0	0	0	0	0	d__Bacteria; p__Proteobacteria; c__Gammaproteobacteria; o__Nitrosococcales; f__Nitrosococcaceae; g__Nitrosococcus; s__Nitrosococcus oceani ATCC 19707
ASV713	0	0	0	0	28	0	0	5	d__Bacteria; p__Firmicutes; c__Bacilli; o__Thermoactinomycetales; f__Thermoactinomycetaceae
ASV714	0	0	0	15	0	0	0	0	d__Bacteria; p__Gemmatimonadota; c__Gemmatimonadetes; o__Gemmatimonadales; f__Gemmatimonadaceae; g__Gemmatimonas; s__uncultured bacterium
ASV715	0	0	0	0	27	22	19	30	d__Bacteria; p__Planctomycetota; c__Planctomycetes; o__Pirellulales; f__Pirellulaceae; g__Pir4 lineage; s__uncultured bacterium
ASV716	9	0	0	0	0	0	0	0	d__Bacteria; p__Firmicutes; c__Bacilli; o__Bacillales; f__Bacillaceae; g__Bacillus; s__Bacillus acidiceler
ASV717	0	0	0	0	0	12	0	0	d__Bacteria; p__Proteobacteria; c__Alphaproteobacteria; o__Sphingomonadales; f__Sphingomonadaceae; g__uncultured
ASV718	25	29	49	11	0	0	0	0	d__Bacteria; p__Actinobacteriota; c__Actinobacteria; o__Micrococcales; f__Intrasporangiaceae; g__Oryzihumus; s__Oryzihumus leptocrescens
ASV719	81	36	47	24	0	0	0	0	d__Bacteria; p__Proteobacteria; c__Gammaproteobacteria; o__Burkholderiales; f__Comamonadaceae; g__Ramlibacter
ASV720	0	0	0	56	0	0	0	0	d__Bacteria; p__Firmicutes; c__Bacilli; o__Paenibacillales; f__Paenibacillaceae; g__Ammoniphilus; s__uncultured bacterium
ASV721	0	0	0	0	81	0	0	33	d__Bacteria; p__Proteobacteria; c__Alphaproteobacteria; o__Sphingomonadales; f__Sphingomonadaceae; g__Ellin6055; s__uncultured bacterium
ASV722	0	0	0	0	32	0	0	17	d__Bacteria; p__Acidobacteriota; c__Vicinamibacteria; o__Vicinamibacterales; f__Vicinamibacteraceae; g__Luteitalea; s__uncultured Acidobacteria bacterium
ASV723	0	0	0	0	56	49	20	47	d__Bacteria; p__Firmicutes; c__Desulfitobacteriia; o__Desulfitobacteriales; f__Heliobacteriaceae; g__uncultured; s__uncultured bacterium
ASV724	0	0	0	0	0	17	0	0	d__Bacteria; p__Proteobacteria; c__Gammaproteobacteria; o__Xanthomonadales; f__Xanthomonadaceae; g__Lysobacter
ASV725	0	11	35	0	0	0	0	0	d__Bacteria; p__Bacteroidota; c__Bacteroidia; o__Chitinophagales; f__Chitinophagaceae; g__uncultured; s__uncultured bacterium
ASV726	30	28	17	28	0	0	0	0	d__Bacteria; p__Chloroflexi; c__Ktedonobacteria; o__Ktedonobacterales; f__Ktedonobacteraceae; g__HSB OF53-F07
ASV727	0	0	0	0	24	0	23	0	d__Bacteria; p__Gemmatimonadota; c__Gemmatimonadetes; o__Gemmatimonadales; f__Gemmatimonadaceae; g__uncultured; s__uncultured bacterium
ASV728	0	0	0	0	45	43	22	33	d__Bacteria; p__Acidobacteriota; c__Blastocatellia; o__Pyrinomonadales; f__Pyrinomonadaceae; g__RB41; s__uncultured Acidobacteria bacterium
ASV729	0	0	0	0	0	16	11	0	d__Bacteria; p__Actinobacteriota; c__Thermoleophilia; o__Gaiellales; f__Gaiellaceae; g__Gaiella; s__uncultured bacterium
ASV730	20	29	17	21	0	0	0	0	d__Bacteria; p__Proteobacteria; c__Gammaproteobacteria; o__Burkholderiales; f__Burkholderiaceae
ASV731	22	57	23	26	0	0	0	0	d__Bacteria; p__Proteobacteria; c__Alphaproteobacteria; o__Rhizobiales; f__Beijerinckiaceae; g__Roseiarcus
ASV732	0	0	0	0	6	3	0	0	d__Bacteria; p__Firmicutes; c__Bacilli; o__Thermoactinomycetales; f__Thermoactinomycetaceae; g__Risungbinella
ASV733	0	0	0	0	0	0	7	0	d__Bacteria; p__Actinobacteriota; c__Thermoleophilia; o__Solirubrobacterales; f__Solirubrobacteraceae; g__uncultured; s__metagenome
ASV734	0	0	0	0	0	1	0	0	d__Bacteria; p__Bacteroidota; c__Bacteroidia; o__Flavobacteriales; f__Flavobacteriaceae; g__uncultured
ASV735	0	0	0	0	23	0	27	0	Unclassified
ASV736	0	46	20	30	0	0	0	0	d__Bacteria; p__Proteobacteria; c__Alphaproteobacteria; o__Azospirillales; f__Azospirillaceae; g__Azospirillum; s__Azospirillum brasilense
ASV737	34	11	23	16	0	0	0	0	d__Bacteria; p__Chloroflexi; c__Ktedonobacteria; o__Ktedonobacterales; f__Ktedonobacteraceae; g__1921-3; s__uncultured Ktedonobacter sp.
ASV738	57	25	22	29	0	0	0	0	d__Bacteria; p__Chloroflexi; c__Ktedonobacteria; o__Ktedonobacterales; f__Ktedonobacteraceae; g__uncultured
ASV739	0	0	0	0	11	12	0	13	d__Bacteria; p__Acidobacteriota; c__Vicinamibacteria; o__Vicinamibacterales; f__Vicinamibacteraceae; g__Luteitalea; s__uncultured Acidobacteria bacterium
ASV740	14	25	13	0	0	0	0	0	d__Bacteria; p__Proteobacteria; c__Gammaproteobacteria; o__Burkholderiales; f__Rhodocyclaceae; g__Denitratisoma; s__uncultured bacterium
ASV741	50	0	74	79	0	0	0	0	d__Bacteria; p__Acidobacteriota; c__Acidobacteriae; o__Acidobacteriales; f__Acidobacteriaceae (Subgroup 1); g__uncultured; s__uncultured bacterium
ASV742	0	13	8	0	0	0	0	0	d__Bacteria; p__Gemmatimonadota; c__Gemmatimonadetes; o__Gemmatimonadales; f__Gemmatimonadaceae; g__Gemmatimonas; s__uncultured bacterium
ASV743	53	0	0	170	0	0	0	0	d__Bacteria; p__Acidobacteriota; c__Acidobacteriae; o__Acidobacteriales; f__Koribacteraceae; g__Candidatus Koribacter; s__uncultured bacterium
ASV744	56	18	39	26	0	0	0	0	d__Bacteria; p__Chloroflexi; c__Ktedonobacteria; o__Ktedonobacterales; f__Ktedonobacteraceae; g__HSB OF53-F07; s__uncultured Chloroflexi bacterium
ASV745	13	23	22	19	0	0	0	0	d__Bacteria; p__Gemmatimonadota; c__Gemmatimonadetes; o__Gemmatimonadales; f__Gemmatimonadaceae; g__uncultured; s__uncultured bacterium
ASV746	0	0	0	0	35	23	30	28	d__Bacteria; p__Acidobacteriota; c__Vicinamibacteria; o__Vicinamibacterales; f__Vicinamibacteraceae; g__Luteitalea; s__uncultured bacterium
ASV747	7	6	13	7	0	0	0	0	d__Bacteria; p__Nitrospirota; c__Nitrospiria; o__Nitrospirales; f__Nitrospiraceae; g__Nitrospira
ASV748	0	0	0	0	0	13	6	0	d__Bacteria; p__Planctomycetota; c__Planctomycetes; o__Pirellulales; f__Pirellulaceae; g__Pir4 lineage; s__uncultured bacterium
ASV749	0	0	27	52	0	0	0	0	d__Bacteria; p__Bacteroidota; c__Bacteroidia; o__Chitinophagales; f__Chitinophagaceae; g__uncultured; s__uncultured Bacteroidetes bacterium
ASV750	11	0	0	0	0	0	0	0	d__Bacteria; p__Proteobacteria; c__Alphaproteobacteria; o__Dongiales; f__Dongiaceae; g__Dongia; s__uncultured bacterium
ASV751	0	0	0	5	0	0	0	0	d__Bacteria; p__Proteobacteria; c__Alphaproteobacteria; o__Rhizobiales; f__Rhizobiaceae; g__Aminobacter
ASV752	0	0	0	0	53	24	15	0	d__Bacteria; p__Planctomycetota; c__Planctomycetes; o__Gemmatales; f__Gemmataceae; g__Gemmata; s__uncultured bacterium
ASV753	0	0	0	0	0	9	9	0	d__Bacteria; p__Proteobacteria; c__Gammaproteobacteria; o__Xanthomonadales; f__Xanthomonadaceae; g__Arenimonas
ASV754	0	0	0	0	16	13	0	10	d__Bacteria; p__Firmicutes; c__Bacilli; o__Bacillales; f__Bacillaceae; g__Ureibacillus
ASV755	46	0	0	56	0	0	0	0	d__Bacteria; p__Planctomycetota; c__Planctomycetes; o__Isosphaerales; f__Isosphaeraceae; g__Aquisphaera; s__uncultured bacterium
ASV756	22	0	23	0	0	0	0	0	d__Bacteria; p__Proteobacteria; c__Alphaproteobacteria; o__Rhizobiales; f__Xanthobacteraceae; g__Bradyrhizobium
ASV757	12	9	57	5	0	0	0	0	d__Bacteria; p__Proteobacteria; c__Gammaproteobacteria; o__Salinisphaerales; f__Solimonadaceae; g__Alkanibacter
ASV758	0	0	0	0	13	28	12	12	d__Bacteria; p__Chloroflexi; c__Chloroflexia; o__Thermomicrobiales; f__Thermomicrobiaceae; g__Nitrolancea; s__uncultured bacterium
ASV759	0	0	0	0	13	0	28	24	d__Bacteria
ASV760	17	41	33	21	0	0	0	0	d__Bacteria; p__Actinobacteriota; c__Thermoleophilia; o__Solirubrobacterales; f__Solirubrobacteraceae; g__Conexibacter; s__uncultured bacterium
ASV761	0	0	0	0	16	15	23	34	d__Bacteria; p__Acidobacteriota; c__Acidobacteriae; o__Solibacterales; f__Solibacteraceae; g__Candidatus Solibacter; s__uncultured bacterium
ASV762	20	0	39	20	0	0	0	0	d__Bacteria; p__Proteobacteria; c__Alphaproteobacteria; o__Reyranellales; f__Reyranellaceae; g__Reyranella; s__uncultured bacterium
ASV763	33	48	20	21	0	0	0	0	d__Bacteria; p__Proteobacteria; c__Alphaproteobacteria; o__Micropepsales; f__Micropepsaceae; g__uncultured
ASV764	0	11	39	14	0	0	0	0	d__Bacteria; p__Proteobacteria; c__Alphaproteobacteria; o__Caulobacterales; f__Caulobacteraceae; g__Asticcacaulis
ASV765	0	0	0	0	15	21	12	24	d__Bacteria; p__Proteobacteria; c__Gammaproteobacteria; o__Salinisphaerales; f__Solimonadaceae; g__Polycyclovorans; s__uncultured bacterium
ASV766	0	0	0	0	0	0	162	92	Unclassified
ASV767	0	0	0	0	0	0	124	46	d__Bacteria; p__Actinobacteriota; c__Actinobacteria; o__Micromonosporales; f__Micromonosporaceae; g__Luedemannella; s__uncultured bacterium
ASV768	27	37	25	14	0	0	0	0	d__Bacteria; p__Gemmatimonadota; c__Gemmatimonadetes; o__Gemmatimonadales; f__Gemmatimonadaceae; g__uncultured; s__uncultured bacterium
ASV769	0	0	0	0	28	24	35	18	d__Bacteria; p__Gemmatimonadota; c__Gemmatimonadetes; o__Gemmatimonadales; f__Gemmatimonadaceae; g__uncultured; s__uncultured bacterium
ASV770	0	0	0	0	13	12	0	0	d__Bacteria; p__Gemmatimonadota; c__Gemmatimonadetes; o__Gemmatimonadales; f__Gemmatimonadaceae; g__Gemmatimonas; s__uncultured bacterium
ASV771	0	13	19	24	0	0	0	0	d__Bacteria; p__Proteobacteria; c__Alphaproteobacteria; o__Caulobacterales; f__Caulobacteraceae; g__Phenylobacterium
ASV772	35	50	21	15	0	0	0	0	d__Bacteria; p__Actinobacteriota; c__Actinobacteria; o__Micrococcales; f__Micrococcaceae; g__Arthrobacter
ASV773	0	0	0	0	38	0	71	83	d__Bacteria; p__Proteobacteria; c__Gammaproteobacteria; o__Burkholderiales; f__Nitrosomonadaceae; g__Ellin6067; s__uncultured bacterium
ASV774	0	0	35	30	0	0	0	0	d__Bacteria; p__Actinobacteriota; c__Actinobacteria
ASV775	0	0	0	0	60	0	86	81	d__Bacteria; p__Acidobacteriota; c__Vicinamibacteria; o__Vicinamibacterales; f__Vicinamibacteraceae; g__Luteitalea; s__uncultured bacterium
ASV776	0	0	0	0	0	0	56	42	d__Bacteria; p__Chloroflexi; c__Anaerolineae; o__Anaerolineales; f__Anaerolineaceae; g__uncultured; s__uncultured bacterium
ASV777	16	50	37	7	0	0	0	0	d__Bacteria; p__Acidobacteriota; c__Holophagae; o__Holophagales; f__Holophagaceae; g__Geothrix; s__uncultured bacterium
ASV778	0	5	0	6	0	8	0	0	d__Bacteria; p__Proteobacteria; c__Alphaproteobacteria; o__Caulobacterales; f__Caulobacteraceae; g__Brevundimonas; s__uncultured bacterium
ASV779	0	0	0	0	40	0	0	0	d__Bacteria; p__Chloroflexi; c__Chloroflexia; o__Chloroflexales; f__Roseiflexaceae; g__uncultured; s__uncultured bacterium
ASV780	18	19	9	0	0	0	0	0	d__Bacteria; p__Verrucomicrobiota; c__Verrucomicrobiae; o__Pedosphaerales; f__Pedosphaeraceae; g__uncultured; s__uncultured bacterium
ASV781	18	0	11	0	0	0	0	0	d__Bacteria; p__Gemmatimonadota; c__Gemmatimonadetes; o__Gemmatimonadales; f__Gemmatimonadaceae; g__uncultured; s__uncultured Gemmatimonas sp.
ASV782	0	0	0	18	0	0	0	0	d__Bacteria; p__Proteobacteria; c__Alphaproteobacteria; o__Acetobacterales; f__Acetobacteraceae; g__Acidicaldus; s__uncultured bacterium
ASV783	35	0	0	44	0	0	0	0	d__Bacteria; p__Actinobacteriota; c__Actinobacteria; o__Frankiales; f__Acidothermaceae; g__Acidothermus; s__uncultured bacterium
ASV784	0	0	0	0	0	0	20	0	d__Bacteria; p__Actinobacteriota; c__Thermoleophilia; o__Gaiellales; f__Gaiellaceae; g__Gaiella; s__uncultured bacterium
ASV785	0	0	0	0	57	44	20	33	d__Bacteria; p__Acidobacteriota; c__Blastocatellia; o__Blastocatellales; f__Blastocatellaceae; g__uncultured
ASV786	30	23	34	44	0	0	0	0	d__Bacteria; p__Gemmatimonadota; c__Gemmatimonadetes; o__Gemmatimonadales; f__Gemmatimonadaceae; g__uncultured; s__uncultured Gemmatimonadetes bacterium
ASV787	5	24	14	3	0	0	0	0	d__Bacteria; p__Bacteroidota; c__Bacteroidia; o__Sphingobacteriales; f__Sphingobacteriaceae; g__Mucilaginibacter
ASV788	20	8	21	26	0	0	0	0	d__Bacteria; p__Planctomycetota; c__Planctomycetes; o__Planctomycetales; f__Gimesiaceae; g__uncultured; s__uncultured bacterium
ASV789	0	0	0	0	3	28	134	33	d__Bacteria; p__Actinobacteriota; c__Actinobacteria; o__Micromonosporales; f__Micromonosporaceae; g__uncultured; s__metagenome
ASV790	0	0	0	0	0	24	0	0	d__Bacteria; p__Desulfobacterota; c__Desulfuromonadia; o__Geobacterales; f__Geobacteraceae; g__uncultured; s__uncultured bacterium
ASV791	0	0	0	0	36	0	25	39	d__Bacteria; p__Gemmatimonadota; c__Longimicrobia; o__Longimicrobiales; f__Longimicrobiaceae; g__Longimicrobium
ASV792	0	0	0	0	12	0	0	0	d__Bacteria; p__Planctomycetota; c__Phycisphaerae; o__Tepidisphaerales; f__Tepidisphaeraceae; g__Tepidisphaera; s__uncultured bacterium
ASV793	0	0	28	18	0	0	0	0	d__Bacteria; p__Firmicutes; c__Bacilli; o__Alicyclobacillales; f__Alicyclobacillaceae; g__Tumebacillus; s__uncultured bacterium
ASV794	67	29	0	56	0	0	0	0	d__Bacteria; p__Acidobacteriota; c__Acidobacteriae; o__Acidobacteriales; f__Acidobacteriaceae (Subgroup 1); g__uncultured; s__uncultured bacterium
ASV795	39	42	42	0	0	0	0	0	d__Bacteria; p__Acidobacteriota; c__Acidobacteriae; o__Acidobacteriales; f__Acidobacteriaceae (Subgroup 1); g__uncultured; s__uncultured bacterium
ASV796	0	0	0	0	0	25	0	0	d__Bacteria; p__Proteobacteria; c__Alphaproteobacteria; o__Rhizobiales; f__Beijerinckiaceae; g__Microvirga
ASV797	0	0	0	0	21	57	30	23	d__Bacteria; p__Actinobacteriota; c__Thermoleophilia; o__Solirubrobacterales; f__Solirubrobacteraceae; g__Solirubrobacter; s__uncultured bacterium
ASV798	0	0	0	0	0	22	110	0	d__Bacteria; p__Nitrospirota; c__Nitrospiria; o__Nitrospirales; f__Nitrospiraceae; g__Nitrospira; s__uncultured bacterium
ASV799	12	29	19	0	0	0	0	0	d__Bacteria; p__Chloroflexi; c__Ktedonobacteria; o__Ktedonobacterales; f__Ktedonobacteraceae; g__1921-3
ASV800	0	0	0	0	30	23	9	11	d__Bacteria; p__Verrucomicrobiota; c__Verrucomicrobiae; o__Pedosphaerales; f__Pedosphaeraceae; g__uncultured; s__uncultured bacterium
ASV801	0	0	0	0	26	45	23	27	d__Bacteria; p__Proteobacteria; c__Alphaproteobacteria; o__Sphingomonadales; f__Sphingomonadaceae; g__Altererythrobacter; s__uncultured bacterium
ASV802	0	0	0	0	0	27	17	31	d__Bacteria; p__Gemmatimonadota; c__Gemmatimonadetes; o__Gemmatimonadales; f__Gemmatimonadaceae; g__uncultured; s__uncultured bacterium
ASV803	0	0	0	0	27	0	0	0	d__Bacteria; p__Actinobacteriota; c__Thermoleophilia; o__Gaiellales; f__Gaiellaceae; g__Gaiella; s__uncultured bacterium
ASV804	22	12	19	42	0	0	0	0	d__Bacteria; p__Chloroflexi; c__Ktedonobacteria; o__Ktedonobacterales; f__Ktedonobacteraceae; g__1921-2; s__uncultured bacterium
ASV805	7	0	0	0	0	0	0	0	Unclassified
ASV806	63	0	22	0	0	0	0	0	d__Bacteria; p__Planctomycetota; c__Planctomycetes; o__Gemmatales; f__Gemmataceae; g__uncultured; s__uncultured planctomycete
ASV807	0	0	0	0	18	0	18	87	d__Bacteria; p__Chloroflexi; c__Anaerolineae; o__Anaerolineales; f__Anaerolineaceae; g__uncultured; s__uncultured bacterium
ASV808	10	15	12	9	0	0	0	0	d__Bacteria; p__Gemmatimonadota; c__Gemmatimonadetes; o__Gemmatimonadales; f__Gemmatimonadaceae; g__uncultured; s__uncultured bacterium
ASV809	0	0	0	0	28	13	11	11	d__Bacteria; p__Gemmatimonadota; c__Gemmatimonadetes; o__Gemmatimonadales; f__Gemmatimonadaceae; g__uncultured
ASV810	0	0	0	0	7	0	0	0	d__Bacteria; p__Proteobacteria; c__Alphaproteobacteria; o__Rhizobiales; f__Rhizobiaceae; g__Mesorhizobium
ASV811	0	0	0	0	15	46	37	24	d__Bacteria; p__Chloroflexi; c__Chloroflexia; o__Thermomicrobiales; f__Thermomicrobiaceae; g__Nitrolancea; s__uncultured bacterium
ASV812	0	0	0	0	0	16	0	0	d__Bacteria; p__Proteobacteria; c__Alphaproteobacteria; o__Parvibaculales; f__Parvibaculaceae; g__Parvibaculum
ASV813	15	0	0	31	0	0	0	0	d__Bacteria; p__Myxococcota; c__Myxococcia; o__Myxococcales; f__Myxococcaceae; g__P3OB-42
ASV814	21	29	29	27	0	0	0	0	Unclassified
ASV815	0	0	0	0	77	42	0	0	d__Bacteria; p__Chloroflexi; c__Anaerolineae; o__Anaerolineales; f__Anaerolineaceae; g__uncultured; s__uncultured bacterium
ASV816	0	0	0	0	0	22	0	0	d__Bacteria; p__Gemmatimonadota; c__Gemmatimonadetes; o__Gemmatimonadales; f__Gemmatimonadaceae; g__uncultured; s__uncultured bacterium
ASV817	0	35	42	46	0	0	0	0	d__Bacteria; p__Proteobacteria; c__Alphaproteobacteria; o__Micropepsales; f__Micropepsaceae; g__uncultured; s__metagenome
ASV818	0	0	0	0	24	0	61	40	d__Bacteria; p__Actinobacteriota; c__Thermoleophilia; o__Gaiellales; f__Gaiellaceae; g__Gaiella; s__uncultured bacterium
ASV819	0	11	13	0	0	0	0	0	d__Bacteria; p__Firmicutes; c__Clostridia; o__Clostridiales; f__Clostridiaceae; g__Clostridium sensu stricto 1
ASV820	56	17	21	17	0	0	0	0	d__Bacteria; p__Acidobacteriota; c__Acidobacteriae; o__Acidobacteriales; f__Koribacteraceae; g__Candidatus Koribacter; s__uncultured bacterium
ASV821	0	0	0	0	19	24	7	0	Unclassified
ASV822	0	0	0	0	0	0	31	0	d__Bacteria; p__Chloroflexi; c__Chloroflexia; o__Chloroflexales; f__Roseiflexaceae; g__uncultured; s__uncultured bacterium
ASV823	0	0	0	0	11	8	0	106	d__Bacteria; p__Chloroflexi; c__Anaerolineae; o__Anaerolineales; f__Anaerolineaceae; g__uncultured; s__uncultured bacterium
ASV824	0	0	0	0	24	12	0	19	d__Bacteria; p__Chloroflexi; c__Anaerolineae; o__Anaerolineales; f__Anaerolineaceae; g__uncultured
ASV825	0	0	0	0	15	16	31	19	d__Bacteria; p__Gemmatimonadota; c__Gemmatimonadetes; o__Gemmatimonadales; f__Gemmatimonadaceae; g__uncultured; s__uncultured bacterium
ASV826	48	24	29	12	0	0	0	0	Unclassified
ASV827	20	11	12	11	0	0	0	0	d__Bacteria; p__Actinobacteriota; c__Coriobacteriia; o__Coriobacteriales; f__Coriobacteriaceae; g__Enorma; s__uncultured bacterium
ASV828	0	0	0	0	0	4	0	0	Unclassified
ASV829	0	0	28	0	0	0	0	0	d__Bacteria; p__Firmicutes; c__Bacilli; o__Paenibacillales; f__Paenibacillaceae; g__Paenibacillus
ASV830	27	19	14	15	0	0	0	0	d__Bacteria; p__Chloroflexi; c__Anaerolineae; o__Anaerolineales; f__Anaerolineaceae; g__uncultured; s__uncultured bacterium
ASV831	0	0	0	0	0	12	0	20	d__Bacteria; p__Actinobacteriota; c__Thermoleophilia; o__Gaiellales; f__Gaiellaceae; g__Gaiella; s__uncultured bacterium
ASV832	0	0	0	0	0	14	0	0	d__Bacteria; p__Proteobacteria; c__Alphaproteobacteria; o__Rhizobiales; f__Rhizobiales Incertae Sedis; g__Nordella; s__uncultured bacterium
ASV833	0	0	0	0	0	0	22	28	d__Bacteria; p__Firmicutes; c__Bacilli; o__Bacillales; f__Bacillaceae; g__Bacillus; s__Bacillus thermoamylovorans
ASV834	0	0	0	0	69	0	39	0	d__Bacteria
ASV835	34	14	38	64	0	0	0	0	d__Bacteria; p__Acidobacteriota; c__Acidobacteriae; o__Acidobacteriales; f__Acidobacteriaceae (Subgroup 1); g__Edaphobacter; s__uncultured Acidobacteria bacterium
ASV836	0	0	0	0	39	40	30	39	d__Bacteria; p__Acidobacteriota; c__Thermoanaerobaculia; o__Thermoanaerobaculales; f__Thermoanaerobaculaceae; g__Subgroup 10; s__uncultured bacterium
ASV837	0	7	12	0	0	0	0	0	d__Bacteria; p__Acidobacteriota; c__Acidobacteriae; o__Acidobacteriales; f__Acidobacteriaceae (Subgroup 1); g__uncultured; s__uncultured Acidobacteria bacterium
ASV838	24	23	14	9	0	0	0	0	d__Bacteria; p__Myxococcota; c__Polyangia; o__Haliangiales; f__Haliangiaceae; g__Haliangium; s__uncultured bacterium
ASV839	0	0	0	0	0	0	21	0	d__Bacteria; p__Gemmatimonadota; c__Gemmatimonadetes; o__Gemmatimonadales; f__Gemmatimonadaceae; g__uncultured
ASV840	0	0	0	0	0	8	3	0	d__Bacteria; p__Actinobacteriota; c__Thermoleophilia; o__Solirubrobacterales; f__Solirubrobacteraceae; g__Solirubrobacter; s__uncultured bacterium
ASV841	0	0	16	0	0	0	0	0	d__Bacteria; p__Firmicutes; c__Bacilli; o__Paenibacillales; f__Paenibacillaceae; g__Paenibacillus; s__Paenibacillus chitinolyticus
ASV842	35	18	28	0	0	0	0	0	d__Bacteria; p__Proteobacteria; c__Alphaproteobacteria; o__Azospirillales; f__Azospirillaceae; g__Azospirillum; s__Azospirillum brasilense
ASV843	40	0	18	48	0	0	0	0	d__Bacteria; p__Acidobacteriota; c__Acidobacteriae; o__Acidobacteriales; f__Acidobacteriaceae (Subgroup 1); g__uncultured; s__uncultured bacterium
ASV844	0	0	0	0	0	0	46	0	d__Bacteria; p__Proteobacteria; c__Alphaproteobacteria; o__Rhizobiales; f__Hyphomicrobiaceae; g__Pedomicrobium; s__uncultured bacterium
ASV845	0	0	0	33	0	0	0	0	d__Bacteria; p__Planctomycetota; c__Planctomycetes; o__Gemmatales; f__Gemmataceae; g__uncultured; s__uncultured planctomycete
ASV846	12	30	14	14	0	0	0	0	d__Bacteria; p__Chloroflexi; c__Ktedonobacteria; o__Ktedonobacterales; f__Ktedonobacteraceae; g__HSB OF53-F07
ASV847	0	0	34	0	0	0	0	0	d__Bacteria; p__Actinobacteriota; c__Thermoleophilia; o__Gaiellales; f__Gaiellaceae; g__Gaiella; s__uncultured bacterium
ASV848	17	30	15	24	0	0	0	0	d__Bacteria; p__Acidobacteriota; c__Acidobacteriae; o__Solibacterales; f__Solibacteraceae; g__Candidatus Solibacter; s__uncultured bacterium
ASV849	13	31	0	33	0	0	0	0	Unclassified
ASV850	52	31	27	44	0	0	0	0	d__Bacteria; p__Acidobacteriota; c__Acidobacteriae; o__Acidobacteriales
ASV851	0	0	0	0	25	0	0	151	d__Bacteria; p__Acidobacteriota; c__Vicinamibacteria; o__Vicinamibacterales; f__Vicinamibacteraceae; g__uncultured; s__uncultured bacterium
ASV852	19	34	26	12	0	0	0	0	d__Bacteria; p__Actinobacteriota; c__Acidimicrobiia; o__Microtrichales; f__Microtrichaceae; g__Sva0996 marine group
ASV853	0	0	0	0	0	21	0	0	d__Bacteria; p__Chloroflexi; c__Anaerolineae
ASV854	0	0	0	0	0	7	0	13	d__Bacteria; p__Chloroflexi; c__Anaerolineae; o__Anaerolineales; f__Anaerolineaceae; g__uncultured
ASV855	24	13	22	27	0	0	0	0	d__Bacteria; p__Chloroflexi; c__Ktedonobacteria; o__Ktedonobacterales; f__Ktedonobacteraceae; g__HSB OF53-F07; s__uncultured Ktedonobacter sp.
ASV856	0	25	0	0	0	0	0	0	d__Bacteria; p__Acidobacteriota; c__Acidobacteriae; o__Bryobacterales; f__Bryobacteraceae; g__Bryobacter; s__uncultured Acidobacteria bacterium
ASV857	0	0	0	0	3	12	12	22	d__Bacteria; p__Chloroflexi; c__Anaerolineae; o__Anaerolineales; f__Anaerolineaceae; g__uncultured; s__uncultured bacterium
ASV858	0	0	0	0	0	11	0	0	d__Bacteria; p__Armatimonadota; c__Fimbriimonadia; o__Fimbriimonadales; f__Fimbriimonadaceae; g__Fimbriimonas; s__metagenome
ASV859	54	0	45	0	0	0	0	0	d__Bacteria; p__Firmicutes; c__Thermincolia; o__Carboxydocellales; f__Carboxydocellaceae; g__Carboxydocella; s__Carboxydocella thermautotrophica
ASV860	0	0	0	0	0	9	0	0	d__Bacteria; p__Bacteroidota; c__Bacteroidia; o__Cytophagales; f__Cytophagaceae; g__Sporocytophaga; s__uncultured bacterium
ASV861	0	0	143	0	0	0	0	0	d__Bacteria; p__Proteobacteria; c__Gammaproteobacteria; o__Burkholderiales; f__Alcaligenaceae; g__Achromobacter
ASV862	0	0	0	0	29	0	0	32	d__Bacteria; p__Acidobacteriota; c__Vicinamibacteria; o__Vicinamibacterales; f__Vicinamibacteraceae; g__Luteitalea
ASV863	59	24	0	0	0	0	0	0	d__Bacteria; p__Acidobacteriota; c__Acidobacteriae; o__Acidobacteriales; f__Acidobacteriaceae (Subgroup 1); g__uncultured
ASV864	0	0	0	0	0	11	0	0	d__Bacteria; p__Actinobacteriota; c__Actinobacteria; o__Frankiales; f__Geodermatophilaceae; g__Geodermatophilus
ASV865	0	0	13	23	0	0	0	0	d__Bacteria; p__Planctomycetota; c__Planctomycetes; o__Gemmatales; f__Gemmataceae; g__uncultured
ASV866	23	19	9	0	0	0	0	0	d__Bacteria; p__Actinobacteriota; c__Thermoleophilia; o__Gaiellales; f__Gaiellaceae; g__Gaiella; s__uncultured bacterium
ASV867	0	0	0	0	20	24	35	41	d__Bacteria
ASV868	50	0	17	101	0	0	0	0	d__Bacteria; p__Firmicutes; c__Bacilli; o__Caldalkalibacillales; f__Caldalkalibacillaceae; g__Caldalkalibacillus
ASV869	0	0	0	0	0	0	15	0	d__Bacteria; p__Proteobacteria; c__Gammaproteobacteria; o__Burkholderiales
ASV870	0	0	0	0	0	0	0	50	d__Bacteria; p__Desulfobacterota
ASV871	0	0	0	0	13	0	0	0	d__Bacteria; p__Acidobacteriota; c__Acidobacteriae; o__Acidobacteriales; f__Koribacteraceae; g__Candidatus Koribacter
ASV872	0	0	0	0	34	0	0	0	d__Bacteria; p__Bacteroidota; c__Bacteroidia; o__Chitinophagales; f__Chitinophagaceae; g__Flavisolibacter; s__uncultured bacterium
ASV873	0	0	0	0	0	0	0	40	d__Bacteria; p__Acidobacteriota; c__Vicinamibacteria; o__Vicinamibacterales; f__Vicinamibacteraceae; g__uncultured
ASV874	0	0	0	0	0	9	13	0	d__Bacteria; p__Proteobacteria; c__Gammaproteobacteria; o__Nitrosococcales; f__Nitrosococcaceae; g__AqS1
ASV875	13	0	24	32	0	0	0	0	d__Bacteria; p__Myxococcota; c__Polyangia; o__Polyangiales; f__Polyangiaceae; g__Pajaroellobacter; s__uncultured bacterium
ASV876	9	32	23	25	0	0	0	0	d__Bacteria
ASV877	0	0	0	0	55	0	29	36	d__Bacteria; p__Acidobacteriota; c__Vicinamibacteria; o__Vicinamibacterales; f__Vicinamibacteraceae; g__Luteitalea; s__uncultured Acidobacteria bacterium
ASV878	0	0	0	0	0	21	23	17	d__Bacteria; p__Acidobacteriota
ASV879	11	22	23	11	0	0	0	0	d__Bacteria; p__Actinobacteriota; c__Actinobacteria; o__Frankiales; f__Acidothermaceae; g__Acidothermus
ASV880	0	0	0	0	0	49	0	0	d__Bacteria; p__Proteobacteria; c__Gammaproteobacteria; o__Burkholderiales; f__Oxalobacteraceae; g__Herbaspirillum; s__uncultured bacterium
ASV881	0	0	0	0	41	25	44	33	d__Bacteria; p__Bacteroidota; c__Bacteroidia; o__Chitinophagales; f__Chitinophagaceae; g__Flavisolibacter; s__uncultured bacterium
ASV882	0	13	0	0	0	0	0	0	d__Bacteria; p__Proteobacteria; c__Gammaproteobacteria; o__Pseudomonadales; f__Moraxellaceae; g__uncultured; s__metagenome
ASV883	0	0	5	4	0	0	0	0	d__Bacteria; p__Acidobacteriota; c__Acidobacteriae; o__Acidobacteriales; f__Acidobacteriaceae (Subgroup 1); g__uncultured; s__uncultured Acidobacteria bacterium
ASV884	62	26	26	35	0	0	0	0	d__Bacteria; p__Thermotogota; c__Thermotogae; o__Thermotogales; f__Fervidobacteriaceae; g__Thermosipho; s__Thermosipho sp. 1063
ASV885	0	0	0	0	44	38	53	0	d__Bacteria; p__Actinobacteriota; c__Actinobacteria; o__Frankiales; f__Sporichthyaceae; g__uncultured; s__uncultured bacterium
ASV886	0	0	0	0	16	30	59	36	d__Bacteria; p__Proteobacteria; c__Alphaproteobacteria; o__Dongiales; f__Dongiaceae; g__Dongia; s__uncultured bacterium
ASV887	0	0	0	0	36	18	0	18	d__Bacteria
ASV888	44	0	0	0	0	0	0	0	d__Bacteria; p__Proteobacteria; c__Alphaproteobacteria; o__Rhizobiales; f__Rhizobiaceae; g__Allorhizobium-Neorhizobium-Pararhizobium-Rhizobium
ASV889	22	34	0	28	0	0	0	0	d__Bacteria; p__Actinobacteriota; c__Thermoleophilia; o__Gaiellales; f__Gaiellaceae; g__Gaiella
ASV890	0	5	10	17	0	0	0	0	d__Bacteria; p__Firmicutes; c__Bacilli; o__Paenibacillales; f__Paenibacillaceae; g__Paenibacillus
ASV891	0	0	23	0	0	0	0	0	d__Bacteria; p__Firmicutes; c__Bacilli; o__Bacillales; f__Bacillaceae; g__Bacillus
ASV892	0	0	0	0	30	14	17	26	d__Bacteria; p__Chloroflexi; c__Anaerolineae; o__Anaerolineales; f__Anaerolineaceae; g__uncultured; s__uncultured Chloroflexi bacterium
ASV893	0	0	0	0	24	0	0	0	d__Bacteria; p__Proteobacteria; c__Gammaproteobacteria; o__Gammaproteobacteria Incertae Sedis; f__Unknown Family; g__Acidibacter; s__uncultured bacterium
ASV894	10	18	31	0	0	0	0	0	d__Bacteria; p__Proteobacteria; c__Gammaproteobacteria; o__Burkholderiales; f__Burkholderiaceae; g__Limnobacter; s__Limnobacter litoralis
ASV895	0	0	0	0	0	31	46	0	d__Bacteria; p__Acidobacteriota; c__Thermoanaerobaculia; o__Thermoanaerobaculales; f__Thermoanaerobaculaceae; g__Subgroup 10
ASV896	0	0	0	0	21	17	42	20	d__Bacteria; p__Gemmatimonadota; c__Gemmatimonadetes; o__Gemmatimonadales; f__Gemmatimonadaceae; g__uncultured; s__uncultured bacterium
ASV897	0	0	0	0	29	31	24	19	d__Bacteria; p__Gemmatimonadota; c__Longimicrobia; o__Longimicrobiales; f__Longimicrobiaceae; g__YC-ZSS-LKJ147; s__uncultured bacterium
ASV898	38	31	30	19	0	0	0	0	d__Bacteria; p__Acidobacteriota; c__Vicinamibacteria; o__Vicinamibacterales; f__Vicinamibacteraceae; g__Luteitalea
ASV899	0	30	0	21	0	0	0	0	d__Bacteria; p__Proteobacteria; c__Alphaproteobacteria; o__Azospirillales; f__Azospirillaceae; g__Skermanella; s__uncultured bacterium
ASV900	0	0	0	0	39	9	0	29	d__Bacteria; p__Chloroflexi; c__Anaerolineae; o__Anaerolineales; f__Anaerolineaceae; g__uncultured; s__uncultured bacterium
ASV901	29	12	34	19	0	0	0	0	d__Bacteria; p__Acidobacteriota; c__Acidobacteriae; o__Acidobacteriales; f__Acidobacteriaceae (Subgroup 1); g__Edaphobacter; s__uncultured Acidobacterium sp.
ASV902	0	0	0	49	0	0	0	0	d__Bacteria; p__Acidobacteriota; c__Acidobacteriae; o__Acidobacteriales; f__Acidobacteriaceae (Subgroup 1); g__uncultured; s__uncultured bacterium
ASV903	0	0	0	0	9	8	78	44	d__Bacteria; p__Desulfobacterota
ASV904	24	11	14	15	0	0	0	0	d__Bacteria; p__Chloroflexi; c__Chloroflexia; o__Thermomicrobiales; f__Thermomicrobiaceae; g__Sphaerobacter; s__Sphaerobacter thermophilus DSM 20745
ASV905	17	20	22	16	0	0	0	0	d__Bacteria; p__Gemmatimonadota; c__Gemmatimonadetes; o__Gemmatimonadales; f__Gemmatimonadaceae; g__Gemmatimonas
ASV906	0	0	0	0	0	32	0	0	d__Bacteria; p__Elusimicrobiota; c__Endomicrobia; o__Endomicrobiales; f__Endomicrobiaceae; g__Endomicrobium; s__uncultured bacterium
ASV907	0	0	0	0	5	0	0	0	d__Bacteria
ASV908	0	0	14	0	0	0	0	0	d__Bacteria; p__Proteobacteria; c__Gammaproteobacteria; o__Burkholderiales; f__Burkholderiaceae; g__Pandoraea; s__Pandoraea thiooxydans
ASV909	0	0	0	0	0	0	4	0	d__Bacteria; p__Proteobacteria; c__Alphaproteobacteria; o__Dongiales; f__Dongiaceae; g__Dongia; s__uncultured Rhodospirillaceae bacterium
ASV910	20	21	0	12	0	0	0	0	d__Bacteria; p__Proteobacteria; c__Alphaproteobacteria; o__Azospirillales; f__Azospirillaceae; g__Skermanella
ASV911	0	0	0	0	0	12	0	0	d__Bacteria; p__Bacteroidota; c__Bacteroidia; o__Chitinophagales; f__Chitinophagaceae; g__Chitinophaga
ASV912	0	0	0	0	12	16	46	35	d__Bacteria; p__Chloroflexi; c__Anaerolineae; o__SBR1031; f__A4b; g__OLB13; s__uncultured bacterium
ASV913	19	12	28	14	0	0	0	0	d__Bacteria; p__Proteobacteria; c__Gammaproteobacteria; o__Burkholderiales; f__Comamonadaceae
ASV914	0	0	0	0	0	0	0	63	d__Bacteria
ASV915	0	0	10	0	0	0	0	0	d__Bacteria; p__Chloroflexi; c__Anaerolineae; o__Anaerolineales; f__Anaerolineaceae; g__uncultured
ASV916	8	0	0	0	9	9	0	0	d__Bacteria; p__Actinobacteriota; c__Actinobacteria; o__Propionibacteriales; f__Nocardioidaceae; g__Kribbella
ASV917	0	0	0	0	11	13	0	0	d__Bacteria; p__Firmicutes; c__Bacilli; o__Paenibacillales; f__Paenibacillaceae; g__Oxalophagus
ASV918	44	0	0	62	0	0	0	0	d__Bacteria; p__Firmicutes; c__Dethiobacteria; o__Dethiobacterales; f__Dethiobacteraceae
ASV919	0	0	0	0	15	24	101	19	d__Bacteria; p__Chloroflexi; c__Anaerolineae; o__SBR1031; f__A4b; g__OLB13
ASV920	0	20	12	14	0	0	0	0	Unclassified
ASV921	0	0	0	0	27	18	16	31	d__Bacteria; p__Planctomycetota; c__Phycisphaerae; o__Tepidisphaerales; f__Tepidisphaeraceae; g__Tepidisphaera; s__uncultured bacterium
ASV922	0	0	0	0	0	10	0	19	d__Bacteria; p__Gemmatimonadota; c__Gemmatimonadetes; o__Gemmatimonadales; f__Gemmatimonadaceae; g__uncultured
ASV923	0	14	24	49	0	0	0	0	d__Bacteria; p__Chloroflexi; c__Ktedonobacteria; o__Ktedonobacterales; f__Ktedonobacteraceae; g__1959-1; s__uncultured bacterium
ASV924	30	0	28	0	0	0	0	0	d__Bacteria; p__Actinobacteriota; c__Actinobacteria; o__Micrococcales; f__Intrasporangiaceae; g__Oryzihumus; s__uncultured bacterium
ASV925	6	3	0	0	5	0	7	4	d__Bacteria; p__Proteobacteria; c__Gammaproteobacteria; o__Burkholderiales; f__Nitrosomonadaceae; g__MND1; s__uncultured bacterium
ASV926	16	13	9	13	0	0	0	0	d__Bacteria; p__Chloroflexi; c__Ktedonobacteria; o__Ktedonobacterales; f__Ktedonobacteraceae; g__FCPS473; s__uncultured bacterium
ASV927	0	0	18	0	0	0	0	0	d__Bacteria; p__Proteobacteria; c__Alphaproteobacteria; o__Acetobacterales; f__Acetobacteraceae; g__Acidicaldus; s__uncultured bacterium
ASV928	0	0	0	0	25	24	31	19	d__Bacteria; p__Acidobacteriota; c__Vicinamibacteria; o__Vicinamibacterales; f__Vicinamibacteraceae; g__Luteitalea; s__uncultured bacterium
ASV929	0	0	6	0	0	0	0	0	d__Bacteria; p__Acidobacteriota; c__Acidobacteriae; o__Acidobacteriales; f__Koribacteraceae; g__Candidatus Koribacter; s__uncultured bacterium
ASV930	15	17	21	10	0	0	0	0	d__Bacteria; p__Chloroflexi; c__Ktedonobacteria; o__Ktedonobacterales; f__Ktedonobacteraceae; g__HSB OF53-F07; s__uncultured Ktedonobacter sp.
ASV931	14	29	12	22	0	0	0	0	Unclassified
ASV932	21	7	13	22	0	0	0	0	d__Bacteria; p__Chloroflexi; c__Ktedonobacteria; o__Ktedonobacterales; f__Ktedonobacteraceae; g__HSB OF53-F07
ASV933	0	0	0	0	0	4	117	56	d__Bacteria; p__Chloroflexi; c__Anaerolineae; o__Anaerolineales; f__Anaerolineaceae; g__Anaerolinea; s__uncultured bacterium
ASV934	0	0	0	0	25	16	28	39	d__Bacteria; p__Proteobacteria; c__Alphaproteobacteria; o__Rhizobiales; f__Xanthobacteraceae; g__Rhodoplanes
ASV935	17	0	0	25	0	0	0	0	d__Bacteria; p__Proteobacteria; c__Alphaproteobacteria; o__Azospirillales; f__Azospirillaceae; g__Azospirillum
ASV936	0	0	0	0	47	106	13	0	d__Bacteria; p__Acidobacteriota; c__Blastocatellia; o__Pyrinomonadales; f__Pyrinomonadaceae; g__RB41
ASV937	0	0	0	0	30	31	37	21	d__Bacteria; p__Chloroflexi; c__Anaerolineae; o__Anaerolineales; f__Anaerolineaceae; g__uncultured
ASV938	0	0	0	0	0	0	0	25	d__Bacteria; p__Acidobacteriota; c__Blastocatellia; o__Pyrinomonadales; f__Pyrinomonadaceae; g__RB41; s__uncultured Acidobacteria bacterium
ASV939	0	0	0	0	0	17	0	11	d__Bacteria; p__Acidobacteriota; c__Vicinamibacteria; o__Vicinamibacterales; f__Vicinamibacteraceae; g__uncultured; s__uncultured bacterium
ASV940	0	0	0	0	12	28	0	0	d__Bacteria; p__Actinobacteriota; c__Acidimicrobiia; o__Microtrichales; f__Microtrichaceae; g__uncultured; s__metagenome
ASV941	54	0	0	0	0	0	0	0	d__Bacteria; p__Firmicutes; c__Bacilli; o__Caldalkalibacillales; f__Caldalkalibacillaceae; g__Caldalkalibacillus
ASV942	0	0	0	0	0	26	37	0	d__Bacteria; p__Firmicutes; c__Bacilli; o__Thermoactinomycetales; f__Thermoactinomycetaceae
ASV943	0	22	18	0	0	0	0	0	d__Bacteria; p__Proteobacteria; c__Alphaproteobacteria; o__Acetobacterales; f__Acetobacteraceae; g__uncultured
ASV944	0	0	11	0	0	0	0	0	d__Bacteria; p__Proteobacteria; c__Gammaproteobacteria; o__Xanthomonadales; f__Rhodanobacteraceae; g__Dyella
ASV945	0	0	0	0	0	0	14	0	d__Bacteria; p__Gemmatimonadota; c__Gemmatimonadetes; o__Gemmatimonadales; f__Gemmatimonadaceae; g__uncultured; s__uncultured Gemmatimonadetes bacterium
ASV946	16	25	22	14	0	0	0	0	d__Bacteria; p__Actinobacteriota; c__Thermoleophilia; o__Gaiellales; f__Gaiellaceae; g__Gaiella; s__uncultured bacterium
ASV947	0	0	0	0	30	17	18	35	d__Bacteria; p__Firmicutes
ASV948	0	11	16	43	0	0	0	0	d__Bacteria; p__Chloroflexi; c__Ktedonobacteria; o__Ktedonobacterales; f__Ktedonobacteraceae; g__uncultured; s__uncultured bacterium
ASV949	0	0	0	0	0	0	37	32	d__Bacteria; p__Acidobacteriota; c__Vicinamibacteria; o__Vicinamibacterales; f__Vicinamibacteraceae; g__uncultured; s__uncultured bacterium
ASV950	0	0	0	0	22	14	28	30	d__Bacteria; p__Planctomycetota; c__Planctomycetes; o__Pirellulales; f__Pirellulaceae; g__uncultured; s__uncultured bacterium
ASV951	21	0	23	0	0	0	0	0	d__Bacteria; p__Chloroflexi; c__Ktedonobacteria; o__Ktedonobacterales; f__Ktedonobacteraceae; g__Ktedonobacter
ASV952	8	22	19	23	0	0	0	0	Unclassified
ASV953	0	0	0	0	21	24	32	31	d__Bacteria; p__Acidobacteriota; c__Thermoanaerobaculia; o__Thermoanaerobaculales; f__Thermoanaerobaculaceae; g__Subgroup 10; s__uncultured bacterium
ASV954	0	0	0	0	42	20	0	56	d__Bacteria; p__Firmicutes
ASV955	0	0	0	0	0	47	28	0	d__Bacteria; p__Actinobacteriota; c__Thermoleophilia; o__Solirubrobacterales; f__Solirubrobacteraceae
ASV956	0	0	0	0	0	2	0	0	d__Bacteria; p__Planctomycetota; c__Planctomycetes; o__Pirellulales; f__Pirellulaceae; g__Rhodopirellula; s__uncultured bacterium
ASV957	18	28	19	26	0	0	0	0	d__Bacteria; p__Chloroflexi; c__Ktedonobacteria; o__Ktedonobacterales; f__Ktedonobacteraceae; g__1921-3; s__uncultured Ktedonobacter sp.
ASV958	60	35	24	27	0	0	0	0	d__Bacteria
ASV959	0	0	0	0	0	0	262	0	d__Bacteria; p__Acidobacteriota; c__Thermoanaerobaculia; o__Thermoanaerobaculales; f__Thermoanaerobaculaceae; g__Subgroup 10; s__uncultured bacterium
ASV960	32	9	25	20	0	0	0	0	d__Bacteria; p__Chloroflexi; c__Ktedonobacteria; o__Ktedonobacterales; f__Ktedonobacteraceae; g__HSB OF53-F07; s__uncultured Ktedonobacter sp.
ASV961	29	44	21	43	0	0	0	0	d__Bacteria; p__Proteobacteria; c__Alphaproteobacteria; o__Azospirillales; f__Azospirillaceae; g__Skermanella
ASV962	8	17	14	13	0	0	0	0	d__Bacteria; p__Firmicutes; c__Clostridia; o__Oscillospirales; f__Oscillospiraceae; g__uncultured; s__uncultured Clostridiaceae bacterium
ASV963	0	0	0	0	0	0	77	0	d__Bacteria; p__Proteobacteria; c__Gammaproteobacteria; o__Burkholderiales; f__Nitrosomonadaceae; g__MND1
ASV964	0	0	0	0	32	23	31	0	d__Bacteria; p__Firmicutes; c__Bacilli; o__Bacillales; f__Planococcaceae
ASV965	0	0	0	0	16	27	85	30	d__Bacteria; p__Chloroflexi; c__Anaerolineae; o__Caldilineales; f__Caldilineaceae; g__uncultured; s__uncultured bacterium
ASV966	45	27	14	27	0	0	0	0	d__Bacteria; p__Acidobacteriota; c__Acidobacteriae; o__Acidobacteriales
ASV967	0	0	0	0	18	32	24	36	d__Bacteria; p__Acidobacteriota; c__Thermoanaerobaculia; o__Thermoanaerobaculales; f__Thermoanaerobaculaceae; g__Subgroup 10; s__uncultured bacterium
ASV968	0	0	0	0	17	36	26	26	d__Bacteria
ASV969	17	22	8	20	0	0	0	0	Unclassified
ASV970	0	68	0	0	0	0	0	0	d__Bacteria; p__Proteobacteria; c__Alphaproteobacteria; o__Azospirillales; f__Inquilinaceae; g__Inquilinus; s__uncultured bacterium
ASV971	0	0	0	0	0	0	2	12	Unclassified
ASV972	6	7	25	19	0	0	0	0	d__Bacteria; p__Chloroflexi; c__Chloroflexia; o__Thermomicrobiales; f__Thermomicrobiaceae; g__Sphaerobacter; s__uncultured bacterium
ASV973	0	0	0	0	23	13	19	8	d__Bacteria; p__Chloroflexi; c__Anaerolineae; o__Anaerolineales; f__Anaerolineaceae; g__uncultured; s__uncultured bacterium
ASV974	24	17	6	16	0	0	0	0	d__Bacteria; p__Firmicutes; c__Bacilli; o__Thermoactinomycetales; f__Thermoactinomycetaceae
ASV975	0	0	11	23	0	0	0	0	d__Bacteria; p__Proteobacteria; c__Gammaproteobacteria; o__Xanthomonadales; f__Rhodanobacteraceae; g__Frateuria; s__Frateuria aurantia
ASV976	22	0	18	15	0	0	0	0	d__Bacteria; p__Firmicutes; c__Thermacetogenia; o__Thermacetogeniales; f__Thermacetogeniaceae
ASV977	0	0	0	0	16	20	15	7	d__Bacteria; p__Actinobacteriota; c__Rubrobacteria; o__Rubrobacterales; f__Rubrobacteriaceae; g__Rubrobacter; s__uncultured bacterium
ASV978	0	0	0	0	24	26	0	0	d__Bacteria; p__Proteobacteria; c__Gammaproteobacteria; o__Burkholderiales; f__Rhodocyclaceae; g__Sulfuritalea; s__uncultured bacterium
ASV979	0	0	0	0	7	3	17	6	d__Bacteria; p__Proteobacteria; c__Alphaproteobacteria; o__Rhodospirillales; f__Magnetospiraceae; g__uncultured; s__uncultured bacterium
ASV980	0	0	0	0	23	0	0	0	d__Bacteria; p__Acidobacteriota; c__Acidobacteriae; o__Acidobacteriales; f__Koribacteraceae; g__Candidatus Koribacter; s__uncultured bacterium
ASV981	29	43	0	30	0	0	0	0	d__Bacteria; p__Acidobacteriota; c__Acidobacteriae; o__Bryobacterales; f__Bryobacteraceae; g__Bryobacter; s__uncultured bacterium
ASV982	7	9	22	0	0	0	0	0	d__Bacteria; p__Proteobacteria; c__Alphaproteobacteria; o__Sphingomonadales; f__Sphingomonadaceae; g__Novosphingobium; s__uncultured bacterium
ASV983	0	0	0	0	76	0	0	77	d__Bacteria; p__Acidobacteriota; c__Vicinamibacteria; o__Vicinamibacterales; f__Vicinamibacteraceae; g__uncultured
ASV984	0	0	0	0	0	0	0	36	d__Bacteria; p__Proteobacteria; c__Gammaproteobacteria; o__Burkholderiales; f__Rhodocyclaceae; g__uncultured; s__uncultured bacterium
ASV985	0	0	0	0	8	0	0	20	d__Bacteria; p__Chloroflexi; c__Anaerolineae; o__SBR1031; f__A4b; g__OLB13; s__uncultured bacterium
ASV986	21	34	25	28	0	0	0	0	d__Bacteria; p__Actinobacteriota; c__Thermoleophilia; o__Solirubrobacterales; f__Solirubrobacteraceae; g__uncultured
ASV987	0	0	0	0	20	0	55	26	d__Bacteria; p__Acidobacteriota; c__Vicinamibacteria; o__Vicinamibacterales; f__Vicinamibacteraceae; g__Luteitalea; s__uncultured bacterium
ASV988	28	34	18	22	0	0	0	0	d__Bacteria; p__Acidobacteriota; c__Acidobacteriae; o__Acidobacteriales; f__Acidobacteriaceae (Subgroup 1)
ASV989	0	0	0	0	13	26	38	13	d__Bacteria; p__Chloroflexi; c__Chloroflexia; o__Chloroflexales; f__Roseiflexaceae; g__uncultured; s__uncultured bacterium
ASV990	0	0	0	0	0	12	0	0	d__Bacteria; p__Planctomycetota; c__Planctomycetes; o__Gemmatales; f__Gemmataceae; g__Gemmata; s__uncultured bacterium
ASV991	18	10	16	28	0	0	0	0	d__Bacteria; p__Chloroflexi; c__Ktedonobacteria; o__Ktedonobacterales; f__Ktedonobacteraceae; g__HSB OF53-F07
ASV992	22	0	0	31	0	0	0	0	d__Bacteria; p__Chloroflexi; c__Ktedonobacteria; o__Ktedonobacterales; f__Ktedonobacteraceae; g__HSB OF53-F07; s__uncultured Ktedonobacter sp.
ASV993	0	0	0	0	8	17	0	0	d__Bacteria; p__Proteobacteria; c__Gammaproteobacteria; o__Xanthomonadales; f__Rhodanobacteraceae; g__Chiayiivirga
ASV994	0	0	0	0	20	36	0	8	d__Bacteria; p__Gemmatimonadota; c__Gemmatimonadetes; o__Gemmatimonadales; f__Gemmatimonadaceae; g__Gemmatimonas; s__uncultured bacterium
ASV995	0	0	9	0	0	0	0	0	d__Bacteria; p__Patescibacteria; c__Saccharimonadia; o__Saccharimonadales; f__Saccharimonadaceae; g__TM7a; s__uncultured bacterium
ASV996	29	61	0	0	0	0	0	0	Unclassified
ASV997	0	0	0	0	20	25	23	0	d__Bacteria; p__Proteobacteria; c__Alphaproteobacteria; o__Azospirillales; f__Azospirillaceae; g__Skermanella; s__uncultured bacterium
ASV998	0	0	0	0	0	0	26	11	d__Bacteria; p__Proteobacteria; c__Alphaproteobacteria; o__Azospirillales; f__Azospirillaceae; g__Desertibacter
ASV999	0	0	0	53	0	0	0	0	d__Bacteria; p__Acidobacteriota; c__Acidobacteriae; o__Acidobacteriales; f__Acidobacteriaceae (Subgroup 1); g__uncultured; s__uncultured bacterium
ASV1000	20	42	0	22	0	0	0	0	d__Bacteria; p__Proteobacteria; c__Gammaproteobacteria; o__Xanthomonadales; f__Rhodanobacteraceae
ASV1001	0	0	0	0	36	32	23	29	d__Bacteria; p__Acidobacteriota; c__Blastocatellia; o__Pyrinomonadales; f__Pyrinomonadaceae; g__RB41; s__uncultured bacterium
ASV1002	0	0	0	0	0	31	16	0	d__Bacteria; p__Actinobacteriota; c__Thermoleophilia; o__Solirubrobacterales; f__Solirubrobacteraceae; g__Conexibacter
ASV1003	0	0	0	0	0	0	321	0	d__Bacteria; p__Myxococcota; c__Polyangia; o__Polyangiales; f__Phaselicystidaceae; g__Phaselicystis; s__uncultured Polyangiaceae bacterium
ASV1004	0	0	0	0	0	14	0	24	d__Bacteria; p__Actinobacteriota; c__Actinobacteria; o__Frankiales; f__Frankiaceae; g__Frankia
ASV1005	0	0	0	0	11	34	0	8	d__Bacteria; p__Proteobacteria; c__Gammaproteobacteria; o__Burkholderiales
ASV1006	26	0	34	22	0	0	0	0	d__Bacteria
ASV1007	0	0	0	0	36	0	0	0	d__Bacteria; p__Actinobacteriota; c__Thermoleophilia; o__Solirubrobacterales; f__Solirubrobacteraceae; g__Solirubrobacter; s__uncultured bacterium
ASV1008	65	0	37	0	0	0	0	0	d__Bacteria; p__Verrucomicrobiota; c__Verrucomicrobiae; o__Pedosphaerales; f__Pedosphaeraceae; g__uncultured; s__uncultured bacterium
ASV1009	21	15	14	23	0	0	0	0	d__Bacteria; p__Chloroflexi; c__Ktedonobacteria; o__Ktedonobacterales; f__Ktedonobacteraceae; g__HSB OF53-F07
ASV1010	0	0	0	0	0	0	13	39	d__Bacteria; p__Methylomirabilota; c__Methylomirabilia; o__Methylomirabilales; f__Methylomirabilaceae; g__Sh765B-TzT-35; s__uncultured bacterium
ASV1011	0	0	0	0	0	0	0	16	d__Bacteria; p__Firmicutes
ASV1012	0	0	0	0	0	11	0	0	d__Bacteria; p__Myxococcota; c__Polyangia; o__Haliangiales; f__Haliangiaceae; g__Haliangium; s__uncultured bacterium
ASV1013	0	0	0	0	22	24	21	0	d__Bacteria; p__Proteobacteria; c__Gammaproteobacteria; o__Xanthomonadales; f__Xanthomonadaceae; g__Thermomonas; s__uncultured bacterium
ASV1014	0	0	34	22	0	0	0	0	d__Bacteria; p__Actinobacteriota; c__Actinobacteria; o__Frankiales; f__Geodermatophilaceae; g__Geodermatophilus
ASV1015	0	0	28	14	0	0	0	0	d__Bacteria; p__Cyanobacteria; c__Cyanobacteriia; o__Cyanobacteriales; f__Phormidiaceae
ASV1016	0	0	27	39	0	0	0	0	d__Bacteria; p__Chloroflexi; c__Ktedonobacteria; o__Ktedonobacterales; f__Ktedonobacteraceae
ASV1017	0	0	0	0	0	15	0	0	d__Bacteria; p__Bacteroidota; c__Bacteroidia; o__Cytophagales; f__Microscillaceae; g__Ohtaekwangia
ASV1018	13	12	0	0	0	0	0	0	d__Bacteria; p__Actinobacteriota; c__Actinobacteria; o__Corynebacteriales; f__Mycobacteriaceae; g__Mycobacterium
ASV1019	2	0	27	24	0	0	0	0	d__Bacteria; p__Verrucomicrobiota; c__Verrucomicrobiae; o__Opitutales; f__Opitutaceae; g__Lacunisphaera; s__metagenome
ASV1020	38	27	33	32	0	0	0	0	d__Bacteria; p__Myxococcota; c__Polyangia; o__Haliangiales; f__Haliangiaceae; g__Haliangium; s__uncultured bacterium
ASV1021	0	0	0	0	0	0	48	40	d__Bacteria; p__Proteobacteria; c__Alphaproteobacteria; o__Micropepsales; f__Micropepsaceae; g__uncultured
ASV1022	0	0	0	0	0	26	17	20	d__Bacteria; p__Gemmatimonadota; c__Gemmatimonadetes; o__Gemmatimonadales; f__Gemmatimonadaceae; g__uncultured
ASV1023	0	0	0	0	11	0	0	0	d__Bacteria; p__Verrucomicrobiota; c__Verrucomicrobiae; o__Pedosphaerales; f__Pedosphaeraceae; g__Ellin517; s__uncultured bacterium
ASV1024	0	0	9	0	0	0	0	0	d__Bacteria; p__Proteobacteria; c__Alphaproteobacteria; o__Rhizobiales; f__Xanthobacteraceae; g__Rhodopseudomonas
ASV1025	0	0	0	0	25	29	21	0	d__Bacteria; p__Firmicutes; c__Bacilli; o__Thermoactinomycetales; f__Thermoactinomycetaceae; g__Planifilum
ASV1026	0	0	0	0	17	13	16	17	d__Bacteria; p__Firmicutes
ASV1027	0	0	0	0	28	12	43	32	d__Bacteria; p__Myxococcota; c__Myxococcia; o__Myxococcales; f__Anaeromyxobacteraceae; g__Anaeromyxobacter; s__uncultured bacterium
ASV1028	0	0	14	23	0	0	0	0	d__Bacteria; p__Acidobacteriota; c__Acidobacteriae; o__Acidobacteriales; f__Acidobacteriaceae (Subgroup 1); g__uncultured
ASV1029	0	0	0	0	18	10	0	0	d__Bacteria; p__Acidobacteriota; c__Acidobacteriae; o__Acidobacteriales; f__Koribacteraceae; g__Candidatus Koribacter; s__uncultured bacterium
ASV1030	9	18	0	0	0	7	0	0	d__Bacteria; p__Actinobacteriota; c__Actinobacteria; o__Pseudonocardiales; f__Pseudonocardiaceae; g__Amycolatopsis
ASV1031	0	0	20	0	0	0	0	0	d__Bacteria; p__Proteobacteria; c__Alphaproteobacteria; o__Rhizobiales; f__Xanthobacteraceae; g__uncultured; s__uncultured bacterium
ASV1032	0	0	0	0	25	22	0	24	d__Bacteria; p__Actinobacteriota; c__Thermoleophilia; o__Gaiellales; f__Gaiellaceae; g__Gaiella; s__uncultured bacterium
ASV1033	12	23	19	0	0	0	0	0	d__Bacteria; p__Proteobacteria; c__Alphaproteobacteria; o__Rhizobiales; f__Methyloligellaceae; g__uncultured; s__uncultured bacterium
ASV1034	0	0	0	16	0	0	0	0	d__Bacteria; p__Gemmatimonadota; c__Gemmatimonadetes; o__Gemmatimonadales; f__Gemmatimonadaceae; g__Gemmatimonas
ASV1035	0	0	0	0	22	41	0	13	d__Bacteria; p__Gemmatimonadota; c__Gemmatimonadetes; o__Gemmatimonadales; f__Gemmatimonadaceae; g__uncultured; s__uncultured bacterium
ASV1036	0	0	31	0	0	0	0	0	d__Bacteria; p__Desulfobacterota; c__Desulfomonilia; o__Desulfomonilales; f__Desulfomonilaceae; g__Desulfomonile
ASV1037	0	0	0	0	0	17	19	0	d__Bacteria; p__Chloroflexi; c__Chloroflexia; o__Chloroflexales; f__Roseiflexaceae; g__uncultured; s__uncultured bacterium
ASV1038	0	0	0	0	17	29	35	28	Unclassified
ASV1039	0	14	0	0	0	0	0	0	d__Bacteria; p__Acidobacteriota; c__Acidobacteriae; o__Bryobacterales; f__Bryobacteraceae; g__Bryobacter; s__uncultured bacterium
ASV1040	13	8	27	21	0	0	0	0	d__Bacteria; p__Proteobacteria; c__Gammaproteobacteria; o__Pseudomonadales; f__Cellvibrionaceae; g__Cellvibrio
ASV1041	14	30	23	12	0	0	0	0	d__Bacteria; p__Chloroflexi; c__Ktedonobacteria; o__Ktedonobacterales; f__Ktedonobacteraceae; g__Ktedonobacter
ASV1042	0	0	0	0	29	0	25	17	d__Bacteria; p__Acidobacteriota; c__Acidobacteriae; o__Solibacterales; f__Solibacteraceae; g__Candidatus Solibacter; s__uncultured bacterium
ASV1043	0	0	0	0	38	15	28	27	d__Bacteria; p__Gemmatimonadota; c__Gemmatimonadetes; o__Gemmatimonadales; f__Gemmatimonadaceae; g__uncultured; s__uncultured bacterium
ASV1044	0	0	0	0	0	0	4	0	d__Bacteria; p__Proteobacteria; c__Gammaproteobacteria; o__Diplorickettsiales; f__Diplorickettsiaceae; g__Aquicella; s__uncultured bacterium
ASV1045	57	10	25	27	0	0	0	0	d__Bacteria; p__Cyanobacteria; c__Cyanobacteriia; o__Cyanobacteriales
ASV1046	35	51	0	21	0	0	0	0	d__Bacteria; p__Proteobacteria; c__Gammaproteobacteria; o__Gammaproteobacteria Incertae Sedis; f__Unknown Family; g__Acidibacter; s__uncultured bacterium
ASV1047	0	0	0	0	43	17	26	17	d__Bacteria; p__Chloroflexi; c__Anaerolineae; o__Anaerolineales; f__Anaerolineaceae; g__uncultured; s__uncultured bacterium
ASV1048	0	0	0	0	30	16	18	29	d__Bacteria; p__Verrucomicrobiota; c__Verrucomicrobiae; o__Pedosphaerales; f__Pedosphaeraceae; g__ADurb.Bin063-1; s__uncultured bacterium
ASV1049	0	0	0	0	12	0	44	9	d__Bacteria; p__Desulfobacterota; c__Desulfomonilia; o__Desulfomonilales; f__Desulfomonilaceae; g__Desulfomonile
ASV1050	86	0	55	0	0	0	0	0	d__Bacteria; p__Acidobacteriota; c__Acidobacteriae; o__Acidobacteriales; f__Acidobacteriaceae (Subgroup 1); g__uncultured
ASV1051	0	0	0	0	107	0	0	0	d__Bacteria; p__Acidobacteriota; c__Blastocatellia; o__Pyrinomonadales; f__Pyrinomonadaceae; g__RB41; s__uncultured bacterium
ASV1052	0	0	0	0	18	13	33	27	d__Bacteria; p__Bacteroidota; c__Bacteroidia; o__Chitinophagales; f__Chitinophagaceae; g__uncultured; s__uncultured bacterium
ASV1053	34	31	19	23	0	0	0	0	d__Bacteria; p__Proteobacteria; c__Alphaproteobacteria; o__Azospirillales; f__Azospirillaceae
ASV1054	18	21	27	15	0	0	0	0	d__Bacteria; p__Proteobacteria; c__Gammaproteobacteria; o__Xanthomonadales; f__Xanthomonadaceae; g__Luteimonas
ASV1055	33	11	11	32	0	0	0	0	d__Bacteria; p__Verrucomicrobiota; c__Verrucomicrobiae; o__Pedosphaerales; f__Pedosphaeraceae; g__Ellin516; s__uncultured bacterium
ASV1056	0	0	0	0	0	0	27	24	d__Bacteria; p__Firmicutes; c__Desulfotomaculia; o__Desulfotomaculales; f__Desulfurisporaceae; g__SCADC1-2-3; s__uncultured bacterium
ASV1057	0	0	0	0	0	14	24	33	d__Bacteria; p__Proteobacteria; c__Alphaproteobacteria; o__Defluviicoccales; f__Defluviicoccaceae; g__Defluviicoccus
ASV1058	0	0	0	0	11	22	0	13	d__Bacteria; p__Gemmatimonadota; c__Gemmatimonadetes; o__Gemmatimonadales; f__Gemmatimonadaceae; g__uncultured; s__uncultured Gemmatimonadetes bacterium
ASV1059	0	22	21	0	0	0	0	0	d__Bacteria; p__Chloroflexi; c__Ktedonobacteria; o__Ktedonobacterales; f__Ktedonobacteraceae; g__Ktedonobacter
ASV1060	0	0	0	0	7	0	65	24	d__Bacteria; p__Acidobacteriota; c__Acidobacteriae; o__Acidobacteriales; f__Acidobacteriaceae (Subgroup 1); g__Acidipila-Silvibacterium
ASV1061	0	0	0	0	15	19	0	0	d__Bacteria; p__Acidobacteriota; c__Vicinamibacteria; o__Vicinamibacterales; f__Vicinamibacteraceae; g__Luteitalea
ASV1062	21	14	25	29	0	0	0	0	d__Bacteria; p__Firmicutes; c__Dethiobacteria; o__Dethiobacterales; f__Dethiobacteraceae; g__uncultured; s__uncultured low G+C Gram-positive bacterium
ASV1063	0	32	0	0	0	0	0	0	d__Bacteria; p__Proteobacteria; c__Alphaproteobacteria; o__Azospirillales; f__Azospirillaceae; g__Rhodocista; s__Rhodospirillum centenum SW
ASV1064	0	0	0	0	0	41	0	25	d__Bacteria; p__Bacteroidota; c__Bacteroidia; o__Chitinophagales; f__Chitinophagaceae; g__Flavisolibacter; s__uncultured bacterium
ASV1065	0	0	0	0	48	0	36	74	d__Bacteria; p__Acidobacteriota; c__Vicinamibacteria; o__Vicinamibacterales; f__Vicinamibacteraceae; g__Vicinamibacter
ASV1066	22	22	11	11	0	0	0	0	d__Bacteria; p__Firmicutes; c__Bacilli; o__Bacillales; f__Bacillaceae; g__Bacillus
ASV1067	0	0	0	0	11	9	9	0	d__Bacteria; p__Actinobacteriota; c__Thermoleophilia; o__Gaiellales; f__Gaiellaceae; g__Gaiella; s__uncultured bacterium
ASV1068	0	0	0	0	20	13	0	30	d__Bacteria; p__Gemmatimonadota; c__Gemmatimonadetes; o__Gemmatimonadales; f__Gemmatimonadaceae; g__uncultured
ASV1069	0	0	0	0	0	0	41	0	d__Bacteria; p__Proteobacteria; c__Alphaproteobacteria; o__Rhizobiales; f__Xanthobacteraceae; g__uncultured; s__uncultured bacterium
ASV1070	0	0	0	0	21	12	12	42	d__Bacteria; p__Verrucomicrobiota; c__Verrucomicrobiae; o__Pedosphaerales; f__Pedosphaeraceae; g__ADurb.Bin063-1; s__uncultured bacterium
ASV1071	0	0	0	0	0	0	58	77	d__Bacteria; p__Acidobacteriota
ASV1072	10	0	19	18	0	0	0	0	d__Bacteria; p__Chloroflexi; c__Ktedonobacteria; o__Ktedonobacterales; f__Ktedonobacteraceae; g__FCPS473
ASV1073	12	6	7	0	0	0	0	0	d__Bacteria; p__Bacteroidota; c__Bacteroidia; o__Chitinophagales; f__Chitinophagaceae; g__Taibaiella; s__uncultured bacterium
ASV1074	0	0	0	0	0	13	18	15	d__Bacteria; p__Proteobacteria; c__Gammaproteobacteria; o__Steroidobacterales; f__Steroidobacteraceae; g__uncultured; s__uncultured bacterium
ASV1075	0	0	0	0	18	26	18	18	d__Bacteria; p__Actinobacteriota; c__Thermoleophilia; o__Solirubrobacterales; f__Solirubrobacteraceae; g__Solirubrobacter; s__uncultured bacterium
ASV1076	0	0	9	0	0	0	0	0	d__Bacteria; p__Bacteroidota; c__Bacteroidia; o__Chitinophagales; f__Chitinophagaceae; g__uncultured; s__uncultured bacterium
ASV1077	0	0	0	0	27	0	38	0	d__Bacteria; p__Gemmatimonadota; c__Gemmatimonadetes; o__Gemmatimonadales; f__Gemmatimonadaceae; g__uncultured
ASV1078	0	0	0	0	0	0	28	0	d__Bacteria; p__Actinobacteriota; c__Actinobacteria; o__Micromonosporales; f__Micromonosporaceae; g__Actinoplanes; s__uncultured bacterium
ASV1079	0	0	0	0	0	6	0	0	d__Bacteria; p__Proteobacteria; c__Alphaproteobacteria; o__Rhizobiales; f__Rhizobiaceae; g__Pseudaminobacter
ASV1080	0	22	0	0	0	0	0	0	d__Bacteria; p__Proteobacteria; c__Gammaproteobacteria; o__Acidithiobacillales; f__Acidithiobacillaceae; g__KCM-B-112; s__uncultured bacterium
ASV1081	8	8	10	0	0	0	0	0	d__Bacteria; p__Actinobacteriota; c__Thermoleophilia; o__Gaiellales; f__Gaiellaceae; g__Gaiella; s__uncultured bacterium
ASV1082	0	0	0	0	0	0	33	30	d__Bacteria; p__Desulfobacterota; c__Desulfuromonadia; o__Geobacterales; f__Geobacteraceae; g__uncultured; s__uncultured bacterium
ASV1083	27	14	0	62	0	0	0	0	d__Bacteria; p__Chloroflexi; c__Ktedonobacteria; o__Ktedonobacterales; f__Ktedonobacteraceae; g__HSB OF53-F07; s__uncultured Ktedonobacter sp.
ASV1084	25	16	19	21	0	0	0	0	d__Bacteria; p__Chloroflexi; c__Ktedonobacteria; o__Ktedonobacterales; f__Ktedonobacteraceae; g__JG30a-KF-32
ASV1085	0	0	0	0	0	17	35	8	d__Bacteria; p__Dependentiae; c__Babeliae; o__Babeliales; f__Babeliaceae; g__Candidatus Babela
ASV1086	0	0	0	0	21	0	0	0	d__Bacteria; p__Chloroflexi; c__Ktedonobacteria; o__Ktedonobacterales; f__Ktedonobacteraceae; g__Ktedonobacter
ASV1087	35	0	24	44	0	0	0	0	d__Bacteria; p__Acidobacteriota; c__Acidobacteriae; o__Acidobacteriales; f__Acidobacteriaceae (Subgroup 1); g__uncultured
ASV1088	0	0	0	0	29	30	0	25	d__Bacteria
ASV1089	0	35	0	0	0	0	0	0	Unclassified
ASV1090	0	0	0	0	0	0	11	0	d__Bacteria; p__Bacteroidota; c__Bacteroidia; o__Chitinophagales; f__Chitinophagaceae; g__uncultured
ASV1091	0	0	0	0	35	17	15	49	d__Bacteria; p__Chloroflexi; c__Anaerolineae; o__Anaerolineales; f__Anaerolineaceae; g__uncultured; s__uncultured bacterium
ASV1092	0	0	0	0	0	17	0	0	Unclassified
ASV1093	0	0	0	0	0	0	0	9	d__Bacteria; p__Cyanobacteria; c__Cyanobacteriia; o__Oxyphotobacteria Incertae Sedis; f__Unknown Family; g__Leptolyngbya EcFYyyy-00; s__uncultured bacterium
ASV1094	0	0	0	0	28	21	13	13	d__Bacteria; p__Planctomycetota; c__Phycisphaerae; o__Phycisphaerales; f__Phycisphaeraceae; g__uncultured; s__metagenome
ASV1095	0	0	0	0	0	17	6	12	d__Bacteria; p__Actinobacteriota; c__Thermoleophilia; o__Gaiellales; f__Gaiellaceae; g__Gaiella
ASV1096	35	32	20	0	0	0	0	0	d__Bacteria; p__Planctomycetota; c__Planctomycetes; o__Pirellulales; f__Pirellulaceae; g__Rhodopirellula; s__uncultured bacterium
ASV1097	0	11	0	0	0	0	0	0	d__Bacteria; p__Actinobacteriota; c__Thermoleophilia; o__Gaiellales; f__Gaiellaceae; g__Gaiella; s__uncultured bacterium
ASV1098	0	18	0	0	0	0	0	0	d__Bacteria; p__Proteobacteria; c__Alphaproteobacteria; o__Rhizobiales; f__Rhizobiaceae; g__Ensifer; s__Ensifer adhaerens
ASV1099	0	0	0	0	0	129	0	54	d__Bacteria; p__Acidobacteriota; c__Blastocatellia; o__Pyrinomonadales; f__Pyrinomonadaceae; g__RB41; s__uncultured bacterium
ASV1100	21	7	0	0	0	0	0	0	d__Bacteria; p__Acidobacteriota; c__Blastocatellia; o__Pyrinomonadales; f__Pyrinomonadaceae; g__RB41; s__uncultured bacterium
ASV1101	0	0	0	0	49	16	15	0	d__Bacteria; p__Nitrospirota; c__Nitrospiria; o__Nitrospirales; f__Nitrospiraceae; g__Nitrospira; s__uncultured bacterium
ASV1102	8	28	16	0	0	0	0	0	d__Bacteria; p__Chloroflexi; c__Ktedonobacteria; o__Ktedonobacterales; f__Ktedonobacteraceae; g__HSB OF53-F07; s__uncultured bacterium
ASV1103	0	26	22	10	0	0	0	0	d__Bacteria; p__Bacteroidota; c__Bacteroidia; o__Sphingobacteriales; f__Sphingobacteriaceae; g__Pedobacter
ASV1104	24	0	0	0	0	0	0	0	d__Bacteria; p__Acidobacteriota
ASV1105	0	0	0	0	32	0	0	0	d__Bacteria; p__Verrucomicrobiota; c__Verrucomicrobiae; o__Pedosphaerales; f__Pedosphaeraceae; g__ADurb.Bin063-1; s__uncultured bacterium
ASV1106	0	0	0	0	25	23	22	29	d__Bacteria; p__Proteobacteria; c__Alphaproteobacteria; o__Reyranellales; f__Reyranellaceae; g__uncultured; s__uncultured bacterium
ASV1107	53	23	27	19	0	0	0	0	d__Bacteria; p__Acidobacteriota; c__Acidobacteriae; o__Acidobacteriales; f__Koribacteraceae; g__Candidatus Koribacter; s__uncultured bacterium
ASV1108	33	0	0	0	0	0	0	0	d__Bacteria; p__Actinobacteriota; c__Acidimicrobiia; o__Acidimicrobiales; f__Acidimicrobiales Incertae Sedis; g__Aciditerrimonas
ASV1109	0	0	0	0	16	0	11	66	d__Bacteria; p__Acidobacteriota
ASV1110	28	34	15	23	0	0	0	0	d__Bacteria; p__Desulfobacterota; c__Desulfomonilia; o__Desulfomonilales; f__Desulfomonilaceae; g__Desulfomonile
ASV1111	0	0	0	0	24	0	10	53	d__Bacteria
ASV1112	0	0	0	0	0	0	17	0	d__Bacteria; p__Actinobacteriota; c__Thermoleophilia; o__Solirubrobacterales; f__Solirubrobacteraceae; g__JCM 18997
ASV1113	0	0	0	0	0	15	0	0	d__Bacteria; p__Proteobacteria; c__Alphaproteobacteria; o__Rhizobiales; f__Devosiaceae; g__Devosia; s__uncultured bacterium
ASV1114	0	38	0	0	0	0	0	0	d__Bacteria; p__Firmicutes; c__Bacilli; o__Alicyclobacillales; f__Alicyclobacillaceae; g__Tumebacillus
ASV1115	0	0	0	0	24	0	0	21	d__Bacteria; p__Chloroflexi; c__Anaerolineae; o__Anaerolineales; f__Anaerolineaceae; g__uncultured; s__uncultured bacterium
ASV1116	0	0	0	0	0	0	15	0	d__Bacteria; p__Actinobacteriota; c__Thermoleophilia; o__Solirubrobacterales; f__Solirubrobacteraceae; g__JCM 18997; s__uncultured bacterium
ASV1117	0	0	0	0	0	39	49	0	d__Bacteria; p__Proteobacteria; c__Alphaproteobacteria; o__Rhizobiales; f__Xanthobacteraceae; g__uncultured; s__uncultured bacterium
ASV1118	0	0	0	0	0	9	4	0	d__Bacteria; p__Proteobacteria; c__Gammaproteobacteria; o__Legionellales; f__Legionellaceae; g__Legionella; s__uncultured organism
ASV1119	48	28	0	0	0	0	0	0	d__Bacteria; p__Acidobacteriota; c__Acidobacteriae; o__Bryobacterales; f__Bryobacteraceae; g__Bryobacter; s__uncultured Acidobacteria bacterium
ASV1120	100	21	17	23	0	0	0	0	d__Bacteria; p__Acidobacteriota; c__Acidobacteriae; o__Acidobacteriales; f__Acidobacteriaceae (Subgroup 1); g__uncultured; s__uncultured bacterium
ASV1121	0	0	0	0	15	0	0	0	d__Bacteria; p__Firmicutes; c__Bacilli; o__Thermoactinomycetales; f__Thermoactinomycetaceae; g__Planifilum
ASV1122	0	0	0	0	27	27	50	14	d__Bacteria; p__Proteobacteria; c__Alphaproteobacteria; o__Caulobacterales; f__Hyphomonadaceae; g__SWB02; s__uncultured bacterium
ASV1123	0	0	0	0	0	15	22	0	d__Bacteria; p__Acidobacteriota; c__Blastocatellia; o__Pyrinomonadales; f__Pyrinomonadaceae; g__RB41; s__uncultured bacterium
ASV1124	0	15	16	26	0	0	0	0	d__Bacteria; p__Chloroflexi; c__Ktedonobacteria; o__Ktedonobacterales; f__Ktedonobacteraceae; g__HSB OF53-F07; s__uncultured Ktedonobacter sp.
ASV1125	0	0	0	0	17	49	29	12	d__Bacteria; p__Firmicutes; c__Thermaerobacteria; o__Thermaerobacterales; f__Thermaerobacteraceae; g__Thermaerobacter
ASV1126	0	0	0	0	17	8	12	7	d__Bacteria; p__Gemmatimonadota; c__Gemmatimonadetes; o__Gemmatimonadales; f__Gemmatimonadaceae; g__uncultured; s__uncultured Gemmatimonadetes bacterium
ASV1127	0	0	0	0	25	21	13	21	d__Bacteria; p__Acidobacteriota; c__Thermoanaerobaculia; o__Thermoanaerobaculales; f__Thermoanaerobaculaceae; g__Subgroup 10
ASV1128	0	58	0	0	0	0	0	0	d__Bacteria; p__Proteobacteria; c__Gammaproteobacteria; o__Gammaproteobacteria Incertae Sedis; f__Unknown Family; g__Acidibacter; s__uncultured bacterium
ASV1129	0	0	0	0	12	0	0	0	d__Bacteria; p__Chloroflexi; c__Chloroflexia; o__Thermomicrobiales; f__Thermomicrobiaceae; g__Nitrolancea; s__uncultured bacterium
ASV1130	0	0	0	0	22	15	37	36	d__Bacteria; p__Gemmatimonadota; c__Gemmatimonadetes; o__Gemmatimonadales; f__Gemmatimonadaceae; g__uncultured; s__uncultured bacterium
ASV1131	0	0	0	0	0	0	0	41	d__Bacteria
ASV1132	29	0	0	0	0	0	0	0	d__Bacteria
ASV1133	0	0	0	0	26	26	14	21	d__Bacteria; p__Armatimonadota; c__Chthonomonadetes; o__Chthonomonadales; f__Chthonomonadaceae; g__Chthonomonas
ASV1134	0	0	0	0	28	27	30	35	d__Bacteria; p__Myxococcota; c__Polyangia; o__Haliangiales; f__Haliangiaceae; g__Haliangium; s__uncultured bacterium
ASV1135	0	0	0	0	0	0	21	0	d__Bacteria; p__Actinobacteriota; c__Thermoleophilia; o__Solirubrobacterales; f__Solirubrobacteraceae; g__Solirubrobacter; s__uncultured bacterium
ASV1136	21	0	16	15	0	0	0	0	d__Bacteria; p__Proteobacteria; c__Alphaproteobacteria; o__Azospirillales; f__Azospirillaceae; g__Azospirillum
ASV1137	0	0	0	0	12	17	0	0	d__Bacteria; p__Actinobacteriota; c__Thermoleophilia; o__Gaiellales; f__Gaiellaceae; g__Gaiella; s__uncultured bacterium
ASV1138	0	0	0	0	0	0	74	86	d__Bacteria
ASV1139	0	0	0	0	18	0	46	0	d__Bacteria; p__Actinobacteriota; c__Actinobacteria; o__Frankiales; f__Frankiaceae; g__Frankia
ASV1140	0	0	0	0	10	7	6	6	d__Bacteria; p__Chloroflexi; c__Ktedonobacteria; o__Ktedonobacterales; f__Ktedonobacteraceae; g__1921-2
ASV1141	28	13	14	15	0	0	0	0	d__Bacteria; p__Acidobacteriota; c__Acidobacteriae; o__Acidobacteriales; f__Koribacteraceae; g__Candidatus Koribacter; s__uncultured bacterium
ASV1142	18	23	9	24	0	0	0	0	d__Bacteria; p__Chloroflexi; c__Ktedonobacteria; o__Ktedonobacterales; f__Ktedonobacteraceae; g__HSB OF53-F07; s__uncultured bacterium
ASV1143	0	0	0	0	23	0	0	20	d__Bacteria; p__Proteobacteria; c__Gammaproteobacteria; o__Burkholderiales; f__Sutterellaceae; g__AAP99
ASV1144	0	0	0	0	9	11	15	25	d__Bacteria; p__Acidobacteriota; c__Acidobacteriae; o__Bryobacterales; f__Bryobacteraceae; g__Bryobacter; s__uncultured bacterium
ASV1145	36	68	23	0	0	0	0	0	Unclassified
ASV1146	18	18	40	19	0	0	0	0	d__Bacteria; p__Patescibacteria; c__Saccharimonadia; o__Saccharimonadales; f__Saccharimonadaceae; g__Candidatus Saccharimonas
ASV1147	0	86	0	0	0	0	0	0	d__Bacteria; p__Firmicutes; c__Natranaerobiia; o__Natranaerobiales; f__Natranaerobiaceae; g__Natranaerobius
ASV1148	0	0	0	0	25	9	36	24	d__Bacteria; p__Chloroflexi; c__Anaerolineae; o__Caldilineales; f__Caldilineaceae; g__uncultured; s__uncultured bacterium
ASV1149	17	19	6	14	0	0	0	0	d__Bacteria; p__Proteobacteria; c__Alphaproteobacteria; o__Acetobacterales; f__Acetobacteraceae; g__uncultured
ASV1150	0	0	0	0	0	0	21	20	d__Bacteria; p__Acidobacteriota
ASV1151	14	0	0	10	0	0	0	0	d__Bacteria
ASV1152	0	0	37	0	0	0	0	0	d__Bacteria; p__Proteobacteria; c__Gammaproteobacteria; o__Burkholderiales; f__Oxalobacteraceae; g__Massilia; s__uncultured bacterium
ASV1153	0	16	0	0	0	0	0	0	d__Bacteria; p__Firmicutes; c__Bacilli; o__Caldalkalibacillales; f__Caldalkalibacillaceae; g__Caldalkalibacillus
ASV1154	0	0	18	0	0	0	0	0	d__Bacteria; p__Proteobacteria; c__Gammaproteobacteria; o__Burkholderiales; f__Oxalobacteraceae; g__Noviherbaspirillum
ASV1155	3	0	13	5	0	0	0	0	Unclassified
ASV1156	15	20	22	18	0	0	0	0	d__Bacteria; p__Proteobacteria; c__Alphaproteobacteria; o__Sphingomonadales; f__Sphingomonadaceae; g__Sphingomonas; s__uncultured bacterium
ASV1157	0	0	0	0	8	19	13	12	d__Bacteria; p__Acidobacteriota; c__Acidobacteriae; o__Bryobacterales; f__Bryobacteraceae; g__Bryobacter; s__uncultured bacterium
ASV1158	0	16	13	25	0	0	0	0	d__Bacteria; p__Desulfobacterota; c__Desulfomonilia; o__Desulfomonilales; f__Desulfomonilaceae; g__Desulfomonile
ASV1159	0	34	0	0	0	0	0	0	d__Bacteria; p__Proteobacteria; c__Alphaproteobacteria; o__Azospirillales; f__Azospirillaceae; g__Azospirillum
ASV1160	0	0	0	0	9	13	20	20	d__Bacteria; p__Chloroflexi; c__Chloroflexia; o__Chloroflexales; f__Roseiflexaceae; g__uncultured; s__uncultured bacterium
ASV1161	0	0	0	0	7	18	0	0	d__Bacteria; p__Gemmatimonadota; c__Gemmatimonadetes; o__Gemmatimonadales; f__Gemmatimonadaceae; g__uncultured; s__uncultured bacterium
ASV1162	0	9	0	0	0	0	0	0	d__Bacteria; p__Chloroflexi; c__Dehalococcoidia; o__Dehalococcoidales; f__Dehalococcoidaceae; g__Dehalogenimonas; s__uncultured bacterium
ASV1163	0	0	0	0	11	51	14	18	d__Bacteria; p__Bacteroidota; c__Bacteroidia; o__Chitinophagales; f__Saprospiraceae; g__uncultured
ASV1164	24	0	0	0	0	0	0	0	d__Bacteria; p__Actinobacteriota; c__Thermoleophilia; o__Gaiellales; f__Gaiellaceae; g__Gaiella; s__uncultured bacterium
ASV1165	0	0	0	0	26	36	0	0	d__Bacteria; p__Myxococcota; c__Polyangia; o__Haliangiales; f__Haliangiaceae; g__Haliangium; s__uncultured bacterium
ASV1166	12	0	0	0	0	0	0	0	d__Bacteria; p__Acidobacteriota; c__Acidobacteriae; o__Acidobacteriales; f__Acidobacteriaceae (Subgroup 1); g__uncultured; s__uncultured bacterium
ASV1167	41	68	39	0	0	0	0	0	d__Bacteria; p__Proteobacteria; c__Gammaproteobacteria; o__Burkholderiales; f__Burkholderiaceae; g__Burkholderia-Caballeronia-Paraburkholderia
ASV1168	0	0	0	0	0	8	2	0	Unclassified
ASV1169	0	0	22	0	0	0	0	0	d__Bacteria; p__Proteobacteria; c__Alphaproteobacteria; o__Micropepsales; f__Micropepsaceae; g__uncultured
ASV1170	28	0	14	17	0	0	0	0	d__Bacteria
ASV1171	0	20	0	12	0	0	0	0	d__Bacteria; p__Proteobacteria; c__Alphaproteobacteria; o__Azospirillales; f__Azospirillaceae; g__Skermanella
ASV1172	12	0	0	0	0	0	0	0	d__Bacteria; p__Patescibacteria; c__Saccharimonadia; o__Saccharimonadales; f__Saccharimonadaceae; g__TM7x; s__uncultured bacterium
ASV1173	0	0	0	0	0	10	0	0	d__Bacteria; p__Proteobacteria; c__Alphaproteobacteria; o__Defluviicoccales; f__Defluviicoccaceae; g__Defluviicoccus
ASV1174	26	39	20	9	0	0	0	0	d__Bacteria; p__Acidobacteriota; c__Acidobacteriae; o__Bryobacterales; f__Bryobacteraceae; g__Bryobacter; s__metagenome
ASV1175	52	0	0	26	0	0	0	0	d__Bacteria; p__Acidobacteriota; c__Acidobacteriae; o__Acidobacteriales; f__Acidobacteriaceae (Subgroup 1); g__uncultured; s__uncultured bacterium
ASV1176	0	0	0	0	0	9	28	20	d__Bacteria; p__Desulfobacterota; c__Desulfobacteria; o__Desulfobacterales; f__Desulfosarcinaceae; g__Sva0081 sediment group
ASV1177	0	0	0	0	0	16	0	0	d__Bacteria; p__Actinobacteriota; c__Actinobacteria
ASV1178	0	0	0	0	7	15	0	19	d__Bacteria; p__Actinobacteriota; c__Rubrobacteria; o__Rubrobacterales; f__Rubrobacteriaceae; g__Rubrobacter; s__uncultured bacterium
ASV1179	0	0	0	0	0	16	33	12	d__Bacteria; p__Myxococcota; c__Myxococcia; o__Myxococcales; f__Myxococcaceae; g__P3OB-42; s__uncultured bacterium
ASV1180	0	0	0	0	0	7	0	0	d__Bacteria; p__Firmicutes; c__Bacilli; o__Bacillales; f__Marinococcaceae
ASV1181	0	0	0	0	0	8	0	0	d__Bacteria; p__Verrucomicrobiota; c__Verrucomicrobiae; o__Pedosphaerales; f__Pedosphaeraceae; g__DEV008
ASV1182	0	27	0	20	0	0	0	0	d__Bacteria; p__Chloroflexi; c__Anaerolineae; o__Anaerolineales; f__Anaerolineaceae; g__uncultured; s__uncultured bacterium
ASV1183	27	0	10	20	0	0	0	0	d__Bacteria; p__Chloroflexi; c__Ktedonobacteria; o__Ktedonobacterales; f__Ktedonobacteraceae; g__1921-3
ASV1184	7	11	5	0	0	0	0	0	d__Bacteria; p__Proteobacteria; c__Gammaproteobacteria; o__Salinisphaerales; f__Solimonadaceae
ASV1185	0	0	53	0	0	0	0	0	d__Bacteria; p__Actinobacteriota; c__Thermoleophilia; o__Solirubrobacterales; f__Solirubrobacteraceae; g__Conexibacter; s__uncultured bacterium
ASV1186	0	0	11	0	0	0	0	0	d__Bacteria; p__Bacteroidota; c__Bacteroidia; o__Chitinophagales; f__Chitinophagaceae; g__Edaphobaculum; s__uncultured bacterium
ASV1187	0	0	9	0	0	0	0	0	d__Bacteria; p__Proteobacteria; c__Alphaproteobacteria; o__Thalassobaculales; f__Oceanibaculaceae; g__Oceanibaculum; s__uncultured bacterium
ASV1188	0	0	0	0	10	13	15	22	d__Bacteria; p__Chloroflexi; c__Anaerolineae; o__Caldilineales; f__Caldilineaceae; g__uncultured
ASV1189	0	0	0	0	0	18	0	0	d__Bacteria; p__Chloroflexi; c__Chloroflexia; o__Thermomicrobiales; f__Thermomicrobiaceae; g__Nitrolancea
ASV1190	38	33	10	0	0	0	0	0	d__Bacteria; p__Firmicutes; c__Bacilli
ASV1191	0	0	0	0	0	0	9	0	d__Bacteria; p__Actinobacteriota; c__Actinobacteria; o__Micromonosporales; f__Micromonosporaceae; g__Dactylosporangium; s__uncultured bacterium
ASV1192	0	0	0	0	32	22	0	19	d__Bacteria; p__Gemmatimonadota; c__Gemmatimonadetes; o__Gemmatimonadales; f__Gemmatimonadaceae; g__uncultured; s__uncultured Gemmatimonadetes bacterium
ASV1193	0	0	0	0	19	12	32	47	d__Bacteria; p__Planctomycetota; c__Planctomycetes; o__Pirellulales; f__Pirellulaceae; g__Pirellula; s__uncultured bacterium
ASV1194	0	0	0	0	11	22	19	33	d__Bacteria; p__Gemmatimonadota; c__Gemmatimonadetes; o__Gemmatimonadales; f__Gemmatimonadaceae; g__uncultured
ASV1195	0	0	0	0	14	24	15	0	d__Bacteria; p__Planctomycetota; c__Phycisphaerae; o__Tepidisphaerales; f__Tepidisphaeraceae; g__Tepidisphaera; s__uncultured bacterium
ASV1196	0	0	0	0	16	0	0	0	d__Bacteria; p__Planctomycetota; c__Planctomycetes; o__Planctomycetales; f__Rubinisphaeraceae
ASV1197	0	0	0	0	0	8	3	0	d__Bacteria; p__Gemmatimonadota; c__Longimicrobia; o__Longimicrobiales; f__Longimicrobiaceae; g__YC-ZSS-LKJ147; s__uncultured bacterium
ASV1198	13	22	0	0	0	0	0	0	d__Bacteria; p__Proteobacteria; c__Alphaproteobacteria; o__Acetobacterales; f__Acetobacteraceae; g__uncultured; s__uncultured bacterium
ASV1199	0	0	28	0	0	0	0	0	d__Bacteria; p__Chloroflexi; c__Ktedonobacteria; o__Ktedonobacterales; f__Ktedonobacteraceae; g__HSB OF53-F07; s__uncultured bacterium
ASV1200	0	0	0	0	21	0	0	69	d__Bacteria; p__Firmicutes; c__Clostridia; o__Peptococcales; f__Peptococcaceae
ASV1201	7	9	11	11	0	0	0	0	d__Bacteria; p__Proteobacteria; c__Alphaproteobacteria; o__Rhizobiales; f__Beijerinckiaceae; g__Microvirga; s__uncultured bacterium
ASV1202	0	0	0	0	9	13	14	10	d__Bacteria; p__Chloroflexi; c__Chloroflexia; o__Chloroflexales; f__Roseiflexaceae; g__uncultured; s__uncultured bacterium
ASV1203	0	0	0	0	0	0	6	0	d__Bacteria; p__Gemmatimonadota; c__Gemmatimonadetes; o__Gemmatimonadales; f__Gemmatimonadaceae; g__Gemmatimonas
ASV1204	0	0	0	0	42	40	0	63	d__Bacteria; p__Acidobacteriota; c__Vicinamibacteria; o__Vicinamibacterales; f__Vicinamibacteraceae; g__Vicinamibacter
ASV1205	0	0	0	0	0	0	0	25	d__Bacteria; p__Verrucomicrobiota; c__Verrucomicrobiae; o__Pedosphaerales; f__Pedosphaeraceae; g__Ellin517; s__uncultured bacterium
ASV1206	11	14	106	26	0	0	0	0	d__Bacteria; p__Proteobacteria; c__Alphaproteobacteria; o__Sphingomonadales; f__Sphingomonadaceae; g__Novosphingobium; s__uncultured bacterium
ASV1207	9	15	17	7	0	0	0	0	d__Bacteria; p__Actinobacteriota; c__Actinobacteria; o__Frankiales; f__Geodermatophilaceae; g__Blastococcus
ASV1208	0	0	0	0	30	24	14	0	d__Bacteria; p__Chloroflexi; c__Chloroflexia; o__Thermomicrobiales; f__Thermomicrobiaceae; g__Nitrolancea
ASV1209	11	31	0	0	0	0	0	0	d__Bacteria; p__Actinobacteriota; c__Actinobacteria; o__Micromonosporales; f__Micromonosporaceae; g__Luedemannella; s__metagenome
ASV1210	36	0	0	57	0	0	0	0	d__Bacteria; p__Acidobacteriota; c__Acidobacteriae; o__Acidobacteriales
ASV1211	0	0	0	0	8	0	7	0	d__Bacteria; p__Proteobacteria; c__Alphaproteobacteria; o__Azospirillales; f__Azospirillales Incertae Sedis; g__Stella; s__metagenome
ASV1212	0	0	14	0	0	0	0	0	d__Bacteria; p__Bacteroidota; c__Bacteroidia; o__Chitinophagales; f__Chitinophagaceae; g__Chitinophaga; s__uncultured Chitinophaga sp.
ASV1213	0	16	19	24	0	0	0	0	d__Bacteria; p__Patescibacteria; c__Saccharimonadia; o__Saccharimonadales; f__Saccharimonadaceae; g__Candidatus Saccharimonas; s__uncultured bacterium
ASV1214	33	0	42	0	0	0	0	0	d__Bacteria; p__Chloroflexi; c__Anaerolineae; o__Anaerolineales; f__Anaerolineaceae; g__uncultured
ASV1215	8	12	7	13	0	0	0	0	d__Bacteria; p__Chloroflexi; c__Ktedonobacteria; o__Ktedonobacterales; f__Ktedonobacteraceae; g__HSB OF53-F07; s__uncultured Ktedonobacter sp.
ASV1216	0	0	0	0	31	30	27	49	d__Bacteria; p__Acidobacteriota; c__Vicinamibacteria; o__Vicinamibacterales; f__Vicinamibacteraceae; g__Luteitalea; s__uncultured bacterium
ASV1217	0	0	0	0	0	24	0	0	d__Bacteria; p__Proteobacteria; c__Gammaproteobacteria; o__Diplorickettsiales; f__Diplorickettsiaceae; g__Aquicella; s__uncultured bacterium
ASV1218	0	0	0	0	6	6	0	0	d__Bacteria; p__Planctomycetota; c__Phycisphaerae; o__Tepidisphaerales; f__Tepidisphaeraceae; g__Tepidisphaera; s__uncultured bacterium
ASV1219	0	41	39	45	0	0	0	0	d__Bacteria; p__Acidobacteriota; c__Acidobacteriae; o__Bryobacterales; f__Bryobacteraceae; g__Bryobacter; s__uncultured Acidobacteria bacterium
ASV1220	0	0	0	0	43	0	0	0	d__Bacteria; p__Verrucomicrobiota; c__Verrucomicrobiae; o__Pedosphaerales; f__Pedosphaeraceae; g__Ellin517; s__uncultured bacterium
ASV1221	0	0	0	0	0	0	0	35	d__Bacteria; p__Acidobacteriota; c__Thermoanaerobaculia; o__Thermoanaerobaculales; f__Thermoanaerobaculaceae; g__Subgroup 10; s__uncultured bacterium
ASV1222	0	0	0	0	30	0	0	0	d__Bacteria; p__Acidobacteriota; c__Acidobacteriae; o__Acidobacteriales; f__Acidobacteriaceae (Subgroup 1); g__uncultured; s__uncultured bacterium
ASV1223	7	31	0	41	0	0	0	0	d__Bacteria; p__Chloroflexi; c__Ktedonobacteria; o__Ktedonobacterales; f__Ktedonobacteraceae; g__JG30a-KF-32
ASV1224	0	0	25	0	0	0	0	0	d__Bacteria; p__Proteobacteria; c__Gammaproteobacteria; o__Burkholderiales; f__Comamonadaceae; g__uncultured
ASV1225	0	0	0	0	0	35	71	38	d__Bacteria; p__Chloroflexi; c__Chloroflexia; o__Chloroflexales; f__Roseiflexaceae; g__uncultured; s__uncultured bacterium
ASV1226	0	0	0	0	20	0	0	27	d__Bacteria; p__Proteobacteria; c__Alphaproteobacteria; o__Rhizobiales; f__Hyphomicrobiaceae; g__Pedomicrobium; s__uncultured bacterium
ASV1227	0	0	0	0	25	21	23	28	d__Bacteria; p__Gemmatimonadota; c__Gemmatimonadetes; o__Gemmatimonadales; f__Gemmatimonadaceae; g__uncultured
ASV1228	0	0	0	31	0	0	0	0	d__Bacteria; p__Verrucomicrobiota; c__Verrucomicrobiae; o__Opitutales; f__Opitutaceae; g__Opitutus; s__metagenome
ASV1229	0	0	14	0	0	0	0	0	d__Bacteria; p__Firmicutes; c__Bacilli; o__Bacillales; f__Sporolactobacillaceae; g__Scopulibacillus
ASV1230	0	25	19	24	0	0	0	0	Unclassified
ASV1231	0	0	0	0	23	21	0	0	d__Bacteria; p__Verrucomicrobiota; c__Verrucomicrobiae; o__Pedosphaerales; f__Pedosphaeraceae
ASV1232	0	0	0	0	0	12	12	24	d__Bacteria; p__Firmicutes; c__Incertae Sedis; o__Thermolithobacterales; f__Thermolithobacteraceae; g__Thermolithobacter
ASV1233	0	0	0	0	17	28	18	14	d__Bacteria; p__Gemmatimonadota; c__Gemmatimonadetes; o__Gemmatimonadales; f__Gemmatimonadaceae; g__Gemmatimonas; s__uncultured bacterium
ASV1234	13	4	11	15	0	0	0	0	d__Bacteria; p__Chloroflexi; c__Ktedonobacteria; o__Ktedonobacterales; f__Ktedonobacteraceae
ASV1235	0	0	0	0	0	0	4	9	d__Bacteria; p__Proteobacteria
ASV1236	0	0	1	0	0	0	0	0	d__Bacteria
ASV1237	0	0	0	0	0	10	0	0	d__Bacteria; p__Firmicutes; c__Bacilli; o__Paenibacillales; f__Paenibacillaceae; g__Paenibacillus
ASV1238	18	13	0	0	0	0	0	0	Unclassified
ASV1239	0	0	0	0	0	11	33	36	d__Bacteria; p__Acidobacteriota; c__Thermoanaerobaculia; o__Thermoanaerobaculales; f__Thermoanaerobaculaceae; g__Subgroup 10; s__uncultured bacterium
ASV1240	5	18	14	13	0	0	0	0	d__Bacteria; p__Acidobacteriota; c__Acidobacteriae; o__Bryobacterales; f__Bryobacteraceae; g__Bryobacter; s__uncultured bacterium
ASV1241	19	22	12	24	0	0	0	0	Unclassified
ASV1242	0	52	39	49	0	0	0	0	d__Bacteria; p__Acidobacteriota; c__Acidobacteriae; o__Acidobacteriales; f__Acidobacteriaceae (Subgroup 1)
ASV1243	8	23	16	0	0	0	0	0	d__Bacteria; p__Chloroflexi; c__Ktedonobacteria; o__Ktedonobacterales; f__Ktedonobacteraceae; g__1921-3; s__uncultured Ktedonobacter sp.
ASV1244	0	18	6	12	0	0	0	0	d__Bacteria; p__Chloroflexi; c__Ktedonobacteria; o__Ktedonobacterales; f__Ktedonobacteraceae; g__1921-3; s__uncultured Ktedonobacter sp.
ASV1245	0	0	0	0	12	9	15	0	d__Bacteria; p__Actinobacteriota; c__Thermoleophilia; o__Gaiellales; f__Gaiellaceae; g__Gaiella; s__uncultured bacterium
ASV1246	0	0	0	0	32	0	0	45	d__Bacteria
ASV1247	0	0	0	251	0	0	0	0	Unclassified
ASV1248	21	4	25	16	0	0	0	0	d__Bacteria; p__Armatimonadota; c__Chthonomonadetes; o__Chthonomonadales; f__Chthonomonadaceae; g__Chthonomonas
ASV1249	13	0	6	0	0	0	0	0	d__Bacteria; p__Proteobacteria; c__Alphaproteobacteria; o__Caulobacterales; f__Caulobacteraceae; g__Asticcacaulis
ASV1250	7	18	16	0	0	0	0	0	d__Bacteria; p__Bacteroidota; c__Bacteroidia; o__Chitinophagales; f__Chitinophagaceae; g__Edaphobaculum; s__uncultured bacterium
ASV1251	0	0	0	0	13	8	18	6	d__Bacteria; p__Actinobacteriota; c__Thermoleophilia; o__Gaiellales; f__Gaiellaceae; g__Gaiella; s__uncultured bacterium
ASV1252	0	0	0	0	8	7	0	0	d__Bacteria; p__Proteobacteria; c__Alphaproteobacteria; o__Sphingomonadales; f__Sphingomonadaceae; g__Croceicoccus; s__Croceicoccus naphthovorans
ASV1253	0	15	0	16	0	0	0	0	d__Bacteria; p__Actinobacteriota; c__Actinobacteria; o__Frankiales; f__Geodermatophilaceae; g__Geodermatophilus
ASV1254	0	20	0	0	0	0	0	0	d__Bacteria; p__Chloroflexi; c__Anaerolineae; o__Thermoflexales; f__Thermoflexaceae; g__Thermoflexus; s__uncultured bacterium
ASV1255	0	0	0	0	7	0	0	0	d__Bacteria; p__Chloroflexi; c__Ktedonobacteria; o__Ktedonobacterales; f__Ktedonobacteraceae; g__Ktedonobacter; s__uncultured Ktedobacteria bacterium
ASV1256	0	0	11	0	0	0	0	0	d__Bacteria; p__Proteobacteria; c__Gammaproteobacteria; o__Burkholderiales; f__Sulfuricellaceae; g__Ferritrophicum; s__uncultured bacterium
ASV1257	0	0	0	0	17	0	0	14	d__Bacteria; p__Chloroflexi; c__Anaerolineae; o__Anaerolineales; f__Anaerolineaceae; g__uncultured; s__uncultured bacterium
ASV1258	0	0	0	0	15	9	31	0	d__Bacteria; p__Chloroflexi; c__Anaerolineae; o__SBR1031; f__A4b; g__OLB13; s__uncultured bacterium
ASV1259	28	0	43	14	0	0	0	0	d__Bacteria; p__Patescibacteria; c__Saccharimonadia; o__Saccharimonadales; f__Saccharimonadaceae
ASV1260	25	22	17	27	0	0	0	0	d__Bacteria; p__Firmicutes; c__Thermacetogenia; o__Thermacetogeniales; f__Thermacetogeniaceae
ASV1261	13	0	16	0	0	0	0	0	d__Bacteria; p__Chloroflexi; c__Ktedonobacteria; o__Ktedonobacterales; f__Ktedonobacteraceae; g__1921-2
ASV1262	0	0	11	7	0	0	0	0	d__Bacteria; p__Proteobacteria; c__Gammaproteobacteria; o__Burkholderiales; f__Comamonadaceae; g__Aquabacterium; s__uncultured bacterium
ASV1263	14	37	0	0	0	0	0	0	d__Bacteria; p__Actinobacteriota; c__Thermoleophilia; o__Gaiellales; f__Gaiellaceae; g__Gaiella; s__uncultured bacterium
ASV1264	0	0	0	0	0	16	0	0	d__Bacteria; p__Actinobacteriota; c__Thermoleophilia; o__Solirubrobacterales; f__Solirubrobacteraceae; g__Conexibacter; s__uncultured bacterium
ASV1265	0	0	0	0	0	24	0	0	d__Bacteria; p__Chloroflexi; c__Chloroflexia; o__Chloroflexales; f__Roseiflexaceae; g__uncultured; s__uncultured soil bacterium
ASV1266	7	0	21	7	0	0	0	0	d__Bacteria; p__Gemmatimonadota; c__Gemmatimonadetes; o__Gemmatimonadales; f__Gemmatimonadaceae; g__uncultured; s__uncultured bacterium
ASV1267	0	0	0	0	0	0	0	41	d__Bacteria; p__Chloroflexi; c__Anaerolineae; o__Anaerolineales; f__Anaerolineaceae; g__Anaerolinea; s__uncultured bacterium
ASV1268	0	0	0	0	32	18	29	34	d__Bacteria; p__Gemmatimonadota; c__Gemmatimonadetes; o__Gemmatimonadales; f__Gemmatimonadaceae; g__uncultured; s__uncultured bacterium
ASV1269	0	0	0	0	0	38	14	0	d__Bacteria; p__Chloroflexi; c__Chloroflexia; o__Thermomicrobiales; f__Thermomicrobiaceae; g__Nitrolancea; s__uncultured bacterium
ASV1270	0	0	0	0	0	0	30	0	d__Bacteria; p__Actinobacteriota; c__Thermoleophilia; o__Solirubrobacterales; f__Solirubrobacteraceae; g__Solirubrobacter; s__uncultured bacterium
ASV1271	0	0	45	0	0	0	0	0	d__Bacteria; p__Proteobacteria; c__Gammaproteobacteria; o__Burkholderiales; f__Oxalobacteraceae; g__Oxalicibacterium
ASV1272	0	0	0	0	5	17	6	45	d__Bacteria; p__Planctomycetota; c__Planctomycetes; o__Pirellulales; f__Pirellulaceae; g__Pirellula; s__uncultured bacterium
ASV1273	0	0	0	0	0	0	72	0	d__Bacteria; p__Acidobacteriota; c__Blastocatellia; o__Pyrinomonadales; f__Pyrinomonadaceae; g__RB41; s__uncultured bacterium
ASV1274	0	0	0	0	29	17	8	8	d__Bacteria; p__Chloroflexi; c__Anaerolineae; o__Anaerolineales; f__Anaerolineaceae; g__uncultured; s__uncultured bacterium
ASV1275	0	0	0	0	0	0	54	0	d__Bacteria; p__Acidobacteriota; c__Thermoanaerobaculia; o__Thermoanaerobaculales; f__Thermoanaerobaculaceae; g__Subgroup 10; s__uncultured bacterium
ASV1276	0	0	0	0	0	22	37	22	d__Bacteria; p__Acidobacteriota; c__Vicinamibacteria; o__Vicinamibacterales; f__Vicinamibacteraceae
ASV1277	0	0	0	14	0	0	0	0	d__Bacteria; p__Chloroflexi; c__Anaerolineae; o__Anaerolineales; f__Anaerolineaceae; g__uncultured
ASV1278	0	0	14	22	0	0	0	0	d__Bacteria; p__Actinobacteriota; c__Thermoleophilia; o__Solirubrobacterales; f__Solirubrobacteraceae; g__Conexibacter; s__uncultured bacterium
ASV1279	32	10	12	6	0	0	0	0	d__Bacteria; p__Chloroflexi; c__Anaerolineae; o__Anaerolineales; f__Anaerolineaceae
ASV1280	0	0	0	21	0	0	0	0	d__Bacteria; p__Proteobacteria; c__Gammaproteobacteria; o__Gammaproteobacteria Incertae Sedis; f__Unknown Family; g__Acidibacter; s__uncultured gamma proteobacterium
ASV1281	0	0	0	0	0	12	0	0	d__Bacteria; p__Elusimicrobiota; c__Endomicrobia; o__Endomicrobiales; f__Endomicrobiaceae; g__Endomicrobium
ASV1282	78	0	46	0	0	0	0	0	d__Bacteria; p__Verrucomicrobiota; c__Verrucomicrobiae; o__Pedosphaerales; f__Pedosphaeraceae; g__ADurb.Bin063-1
ASV1283	0	0	0	0	0	0	34	14	d__Bacteria; p__Chloroflexi; c__Anaerolineae; o__SBR1031; f__A4b; g__OLB13
ASV1284	0	0	0	0	0	0	0	31	d__Bacteria; p__Acidobacteriota; c__Vicinamibacteria; o__Vicinamibacterales; f__Vicinamibacteraceae; g__Luteitalea; s__uncultured bacterium
ASV1285	25	10	14	7	0	0	0	0	d__Bacteria; p__Bacteroidota; c__Bacteroidia; o__Cytophagales; f__Microscillaceae; g__uncultured
ASV1286	0	0	0	0	18	22	15	0	d__Bacteria; p__Chloroflexi; c__Chloroflexia; o__Thermomicrobiales; f__Thermomicrobiaceae; g__Nitrolancea; s__uncultured bacterium
ASV1287	19	37	20	28	0	0	0	0	d__Bacteria; p__Proteobacteria; c__Gammaproteobacteria; o__Burkholderiales; f__Burkholderiaceae; g__Burkholderia-Caballeronia-Paraburkholderia
ASV1288	23	18	26	21	0	0	0	0	d__Bacteria; p__Acidobacteriota; c__Vicinamibacteria; o__Vicinamibacterales; f__Vicinamibacteraceae; g__uncultured
ASV1289	12	30	0	0	0	0	0	0	d__Bacteria; p__Acidobacteriota; c__Acidobacteriae; o__Bryobacterales; f__Bryobacteraceae; g__Bryobacter; s__uncultured bacterium
ASV1290	0	2	14	4	0	0	0	0	d__Bacteria; p__Proteobacteria; c__Alphaproteobacteria; o__Ferrovibrionales; f__Ferrovibrionaceae; g__Ferrovibrio
ASV1291	19	16	12	0	0	0	0	0	d__Bacteria; p__Patescibacteria; c__Saccharimonadia; o__Saccharimonadales; f__Saccharimonadaceae; g__TM7a; s__uncultured bacterium
ASV1292	12	0	22	0	0	0	0	0	d__Bacteria; p__Actinobacteriota; c__Actinobacteria; o__Frankiales; f__Acidothermaceae; g__Acidothermus; s__uncultured bacterium
ASV1293	0	0	0	0	0	16	19	25	d__Bacteria; p__Gemmatimonadota; c__Longimicrobia; o__Longimicrobiales; f__Longimicrobiaceae; g__YC-ZSS-LKJ147; s__uncultured bacterium
ASV1294	0	0	0	0	0	0	4	5	d__Bacteria; p__Gemmatimonadota; c__Gemmatimonadetes; o__Gemmatimonadales; f__Gemmatimonadaceae; g__uncultured; s__uncultured bacterium
ASV1295	6	3	5	13	0	0	0	0	d__Bacteria; p__Firmicutes; c__Bacilli; o__Alicyclobacillales; f__Alicyclobacillaceae; g__Alicyclobacillus; s__Alicyclobacillus acidoterrestris
ASV1296	0	27	0	0	0	0	0	0	d__Bacteria; p__Actinobacteriota; c__Actinobacteria; o__Micrococcales; f__Intrasporangiaceae; g__Oryzihumus; s__uncultured bacterium
ASV1297	0	0	0	0	17	11	22	0	d__Bacteria; p__Chloroflexi; c__Anaerolineae; o__Anaerolineales; f__Anaerolineaceae; g__uncultured; s__uncultured bacterium
ASV1298	15	17	16	12	0	0	0	0	d__Bacteria; p__Chloroflexi; c__Ktedonobacteria; o__Ktedonobacterales; f__Ktedonobacteraceae; g__1921-3; s__uncultured Ktedonobacter sp.
ASV1299	0	0	10	55	0	0	0	0	d__Bacteria; p__Nitrospirota; c__Nitrospiria; o__Nitrospirales; f__Nitrospiraceae; g__Nitrospira; s__uncultured bacterium
ASV1300	23	23	15	17	0	0	0	0	d__Bacteria; p__Firmicutes; c__Desulfotomaculia; o__Desulfotomaculales; f__Desulfurisporaceae; g__Desulfofundulus; s__Desulfofundulus kuznetsovii
ASV1301	0	0	0	0	0	8	0	0	d__Bacteria; p__Actinobacteriota; c__Actinobacteria; o__Propionibacteriales; f__Nocardioidaceae; g__Nocardioides; s__uncultured bacterium
ASV1302	0	0	0	0	0	7	0	0	d__Bacteria; p__Proteobacteria; c__Alphaproteobacteria; o__Rhodospirillales; f__Magnetospiraceae; g__Magnetospira
ASV1303	16	13	18	20	0	0	0	0	d__Bacteria; p__Chloroflexi; c__Anaerolineae; o__Thermoflexales; f__Thermoflexaceae; g__Thermoflexus; s__uncultured bacterium
ASV1304	0	0	0	0	0	9	0	0	d__Bacteria; p__Verrucomicrobiota; c__Omnitrophia; o__Omnitrophales; f__Omnitrophaceae; g__Candidatus Omnitrophus
ASV1305	0	0	0	0	8	15	24	0	Unclassified
ASV1306	0	0	12	0	0	0	0	0	d__Bacteria; p__Proteobacteria; c__Alphaproteobacteria; o__Rhizobiales; f__Rhizobiaceae; g__Allorhizobium-Neorhizobium-Pararhizobium-Rhizobium
ASV1307	0	0	64	0	0	0	0	0	d__Bacteria; p__Acidobacteriota; c__Acidobacteriae; o__Acidobacteriales; f__Acidobacteriaceae (Subgroup 1); g__uncultured; s__uncultured bacterium
ASV1308	0	0	0	0	61	0	0	0	d__Bacteria; p__Verrucomicrobiota; c__Verrucomicrobiae; o__Pedosphaerales; f__Pedosphaeraceae; g__Ellin517; s__uncultured bacterium
ASV1309	8	7	24	13	0	0	0	0	d__Bacteria; p__Chloroflexi; c__Ktedonobacteria; o__Ktedonobacterales; f__Ktedonobacteraceae; g__HSB OF53-F07; s__uncultured bacterium
ASV1310	0	6	16	21	0	0	0	0	Unclassified
ASV1311	0	0	0	0	0	0	14	0	d__Bacteria; p__Actinobacteriota; c__Thermoleophilia; o__Gaiellales; f__Gaiellaceae; g__Gaiella
ASV1312	17	26	18	12	0	0	0	0	d__Bacteria; p__Proteobacteria; c__Gammaproteobacteria; o__Diplorickettsiales; f__Diplorickettsiaceae; g__uncultured
ASV1313	17	27	0	24	0	0	0	0	d__Bacteria; p__Planctomycetota; c__Planctomycetes; o__Isosphaerales; f__Isosphaeraceae; g__uncultured; s__uncultured bacterium
ASV1314	0	0	0	0	6	4	0	0	d__Bacteria; p__Proteobacteria; c__Alphaproteobacteria; o__Rhodospirillales; f__Rhodospirillaceae; g__uncultured; s__metagenome
ASV1315	0	0	0	0	0	7	0	0	d__Bacteria; p__Gemmatimonadota; c__Gemmatimonadetes; o__Gemmatimonadales; f__Gemmatimonadaceae; g__uncultured; s__uncultured bacterium
ASV1316	17	0	0	0	0	0	0	0	d__Bacteria; p__Planctomycetota; c__Planctomycetes; o__Isosphaerales; f__Isosphaeraceae; g__Singulisphaera; s__uncultured bacterium
ASV1317	0	0	0	0	0	26	0	0	d__Bacteria; p__Proteobacteria; c__Gammaproteobacteria; o__Burkholderiales; f__Comamonadaceae; g__Ramlibacter
ASV1318	4	5	21	10	0	0	0	0	d__Bacteria; p__Patescibacteria; c__Saccharimonadia; o__Saccharimonadales; f__Saccharimonadaceae; g__TM7a; s__uncultured bacterium
ASV1319	0	0	0	0	0	0	0	27	d__Bacteria; p__Methylomirabilota; c__Methylomirabilia; o__Methylomirabilales; f__Methylomirabilaceae; g__Sh765B-TzT-35; s__uncultured bacterium
ASV1320	0	0	0	0	0	17	0	13	d__Bacteria; p__Chloroflexi; c__Anaerolineae; o__SBR1031; f__A4b; g__OLB13
ASV1321	0	0	0	0	14	25	0	0	d__Bacteria; p__Planctomycetota; c__Planctomycetes; o__Pirellulales; f__Pirellulaceae; g__Pirellula; s__uncultured bacterium
ASV1322	15	26	0	15	0	0	0	0	d__Bacteria; p__Proteobacteria; c__Alphaproteobacteria; o__Acetobacterales; f__Acetobacteraceae; g__uncultured; s__uncultured bacterium
ASV1323	0	0	0	0	0	0	25	0	d__Bacteria; p__Acidobacteriota; c__Thermoanaerobaculia; o__Thermoanaerobaculales; f__Thermoanaerobaculaceae; g__TPD-58; s__uncultured bacterium
ASV1324	0	0	0	0	0	0	0	32	d__Bacteria; p__Acidobacteriota; c__Blastocatellia; o__Pyrinomonadales; f__Pyrinomonadaceae; g__RB41; s__uncultured bacterium
ASV1325	0	0	0	0	0	0	26	0	d__Bacteria; p__Acidobacteriota; c__Acidobacteriae; o__Solibacterales; f__Solibacteraceae; g__Candidatus Solibacter; s__uncultured bacterium
ASV1326	0	0	0	0	18	6	70	12	d__Bacteria; p__Acidobacteriota; c__Vicinamibacteria; o__Vicinamibacterales; f__Vicinamibacteraceae; g__Luteitalea; s__uncultured bacterium
ASV1327	0	0	0	0	0	20	40	0	d__Bacteria; p__Gemmatimonadota; c__Gemmatimonadetes; o__Gemmatimonadales; f__Gemmatimonadaceae; g__uncultured; s__uncultured bacterium
ASV1328	23	0	0	37	0	0	0	0	d__Bacteria; p__Chloroflexi; c__Ktedonobacteria; o__Ktedonobacterales; f__Ktedonobacteraceae; g__HSB OF53-F07; s__uncultured bacterium
ASV1329	0	0	0	0	7	7	13	20	d__Bacteria; p__Armatimonadota; c__Fimbriimonadia; o__Fimbriimonadales; f__Fimbriimonadaceae; g__Fimbriimonas; s__Fimbriimonas ginsengisoli Gsoil 348
ASV1330	14	0	0	0	0	0	0	0	d__Bacteria; p__Chloroflexi; c__Ktedonobacteria; o__Ktedonobacterales; f__Ktedonobacteraceae; g__Ktedonobacter; s__uncultured Ktedobacteria bacterium
ASV1331	8	20	10	8	0	0	0	0	d__Bacteria; p__Actinobacteriota; c__Thermoleophilia; o__Gaiellales; f__Gaiellaceae; g__Gaiella; s__uncultured bacterium
ASV1332	0	23	11	16	0	0	0	0	d__Bacteria; p__Chloroflexi; c__Ktedonobacteria; o__Ktedonobacterales; f__Ktedonobacteraceae; g__1921-3
ASV1333	10	11	0	13	0	0	0	0	d__Bacteria; p__Actinobacteriota; c__Acidimicrobiia; o__Microtrichales; f__Ilumatobacteraceae; g__uncultured; s__uncultured bacterium
ASV1334	0	0	0	0	0	25	0	0	d__Bacteria; p__Patescibacteria; c__Saccharimonadia; o__Saccharimonadales; f__Saccharimonadaceae; g__TM7x
ASV1335	16	28	0	7	0	0	0	0	d__Bacteria; p__Myxococcota; c__Polyangia; o__Polyangiales; f__Polyangiaceae; g__Pajaroellobacter; s__uncultured bacterium
ASV1336	0	48	0	0	0	0	0	0	Unclassified
ASV1337	0	14	10	14	0	0	0	0	d__Bacteria; p__Chloroflexi; c__Ktedonobacteria; o__Ktedonobacterales; f__Ktedonobacteraceae; g__1921-3; s__uncultured Ktedonobacter sp.
ASV1338	0	22	0	14	0	0	0	0	d__Bacteria; p__Chloroflexi; c__Ktedonobacteria; o__Ktedonobacterales; f__Ktedonobacteraceae; g__Ktedonobacter
ASV1339	10	0	29	15	0	0	0	0	d__Bacteria; p__Bacteroidota; c__Bacteroidia; o__Chitinophagales; f__Chitinophagaceae; g__Edaphobaculum; s__uncultured bacterium
ASV1340	0	0	0	0	0	6	8	0	d__Bacteria; p__Chloroflexi; c__Anaerolineae; o__Anaerolineales; f__Anaerolineaceae; g__uncultured; s__uncultured bacterium
ASV1341	0	0	0	0	0	0	0	8	Unclassified
ASV1342	0	0	0	0	11	8	13	28	d__Bacteria; p__Actinobacteriota; c__Acidimicrobiia; o__Acidimicrobiales; f__Acidimicrobiaceae; g__uncultured; s__uncultured bacterium
ASV1343	0	13	23	21	0	0	0	0	d__Bacteria; p__Actinobacteriota; c__Actinobacteria; o__Micrococcales; f__Intrasporangiaceae; g__Pedococcus-Phycicoccus
ASV1344	42	14	21	0	0	0	0	0	d__Bacteria; p__Firmicutes
ASV1345	0	0	0	0	0	18	23	22	d__Bacteria; p__Proteobacteria; c__Alphaproteobacteria; o__Rhizobiales; f__Rhodobiaceae; g__Afifella; s__Afifella pfennigii
ASV1346	29	0	69	39	0	0	0	0	d__Bacteria; p__Verrucomicrobiota; c__Verrucomicrobiae; o__Pedosphaerales; f__Pedosphaeraceae; g__uncultured; s__uncultured bacterium
ASV1347	0	0	0	0	0	0	24	0	d__Bacteria; p__Chloroflexi; c__Chloroflexia; o__Chloroflexales; f__Roseiflexaceae; g__uncultured; s__uncultured bacterium
ASV1348	0	0	0	0	37	19	6	14	d__Bacteria
ASV1349	13	16	12	18	0	0	0	0	d__Bacteria; p__Chloroflexi; c__Ktedonobacteria; o__Ktedonobacterales; f__Ktedonobacteraceae; g__HSB OF53-F07; s__uncultured Ktedonobacter sp.
ASV1350	0	0	0	0	20	0	0	18	d__Bacteria; p__Chloroflexi; c__Anaerolineae; o__Anaerolineales; f__Anaerolineaceae; g__uncultured; s__uncultured bacterium
ASV1351	15	0	0	0	0	0	0	0	d__Bacteria
ASV1352	23	28	0	0	0	0	0	0	Unclassified
ASV1353	0	0	12	6	0	3	0	0	d__Bacteria; p__Cyanobacteria; c__Cyanobacteriia; o__Thermosynechococcales; f__Thermosynechococcaceae; g__Cyanothece PCC 7425; s__Cyanothece sp. PCC 7425
ASV1354	20	0	25	0	0	0	0	0	d__Bacteria; p__Bacteroidota; c__Bacteroidia; o__Chitinophagales; f__Chitinophagaceae; g__Flavisolibacter; s__uncultured bacterium
ASV1355	0	0	0	0	0	25	43	34	d__Bacteria; p__Verrucomicrobiota; c__Verrucomicrobiae; o__Pedosphaerales; f__Pedosphaeraceae; g__ADurb.Bin063-1; s__uncultured bacterium
ASV1356	0	18	0	0	0	0	0	0	d__Bacteria; p__Planctomycetota; c__Phycisphaerae; o__Tepidisphaerales; f__Tepidisphaeraceae; g__Tepidisphaera; s__uncultured bacterium
ASV1357	0	0	0	0	9	0	20	0	d__Bacteria; p__Firmicutes; c__Clostridia; o__Peptococcales; f__Peptococcaceae; g__uncultured; s__uncultured bacterium
ASV1358	0	0	0	0	37	0	0	22	d__Bacteria; p__Acidobacteriota; c__Blastocatellia; o__Pyrinomonadales; f__Pyrinomonadaceae; g__RB41; s__uncultured bacterium
ASV1359	0	0	0	0	0	58	26	0	d__Bacteria; p__Bacteroidota; c__Bacteroidia; o__Chitinophagales; f__Chitinophagaceae; g__Flavisolibacter; s__uncultured bacterium
ASV1360	18	11	0	5	0	0	0	0	d__Bacteria; p__Proteobacteria; c__Gammaproteobacteria; o__Ectothiorhodospirales; f__Ectothiorhodospiraceae; g__uncultured; s__uncultured bacterium
ASV1361	0	0	0	0	44	4	13	45	d__Bacteria; p__Acidobacteriota; c__Acidobacteriae; o__Acidobacteriales; f__Acidobacteriaceae (Subgroup 1); g__uncultured
ASV1362	0	0	0	0	0	7	0	0	d__Bacteria; p__Firmicutes; c__Clostridia; o__Oscillospirales; f__Ruminococcaceae; g__uncultured; s__uncultured bacterium
ASV1363	0	0	186	0	0	0	0	0	d__Bacteria; p__Bacteroidota; c__Bacteroidia; o__Chitinophagales; f__Chitinophagaceae; g__Niastella
ASV1364	0	98	51	0	0	0	0	0	Unclassified
ASV1365	0	0	0	0	24	28	0	0	d__Bacteria; p__Proteobacteria; c__Alphaproteobacteria; o__Sphingomonadales; f__Sphingomonadaceae; g__Sphingomonas; s__uncultured bacterium
ASV1366	25	0	14	24	0	0	0	0	d__Bacteria; p__Acidobacteriota; c__Acidobacteriae; o__Acidobacteriales; f__Acidobacteriaceae (Subgroup 1); g__Bryocella; s__uncultured bacterium
ASV1367	36	66	0	40	0	0	0	0	d__Bacteria; p__Verrucomicrobiota; c__Verrucomicrobiae; o__Pedosphaerales; f__Pedosphaeraceae; g__ADurb.Bin063-1; s__uncultured bacterium
ASV1368	0	0	0	0	26	7	9	17	d__Bacteria; p__Chloroflexi; c__Anaerolineae; o__Thermoflexales; f__Thermoflexaceae; g__Thermoflexus; s__uncultured bacterium
ASV1369	0	0	0	0	47	0	0	0	d__Bacteria; p__Acidobacteriota; c__Vicinamibacteria; o__Vicinamibacterales; f__Vicinamibacteraceae; g__uncultured
ASV1370	0	0	15	15	0	0	0	0	d__Bacteria; p__Cyanobacteria; c__Vampirivibrionia; o__Vampirovibrionales; f__Vampirovibrionaceae; g__Vampirovibrio; s__uncultured bacterium
ASV1371	0	0	0	0	10	8	0	0	d__Bacteria; p__Proteobacteria; c__Alphaproteobacteria; o__Rhodospirillales; f__Magnetospiraceae; g__Magnetospira; s__uncultured bacterium
ASV1372	0	0	0	0	0	14	19	22	d__Bacteria; p__Actinobacteriota; c__Thermoleophilia; o__Gaiellales; f__Gaiellaceae; g__Gaiella; s__uncultured bacterium
ASV1373	0	0	0	0	30	0	24	21	d__Bacteria; p__Desulfobacterota; c__Desulfuromonadia; o__Geobacterales; f__Geobacteraceae; g__uncultured; s__uncultured bacterium
ASV1374	0	9	3	0	0	0	0	0	Unclassified
ASV1375	0	0	0	0	10	7	0	9	d__Bacteria; p__Deinococcota; c__Deinococci; o__Thermales; f__Thermaceae; g__Meiothermus
ASV1376	15	12	8	14	0	0	0	0	d__Bacteria; p__Chloroflexi; c__Ktedonobacteria; o__Ktedonobacterales; f__Ktedonobacteraceae; g__G12-WMSP1
ASV1377	0	0	10	0	0	0	0	0	d__Bacteria; p__Chloroflexi; c__Chloroflexia; o__Thermomicrobiales; f__Thermomicrobiaceae; g__Nitrolancea; s__uncultured bacterium
ASV1378	30	10	26	20	0	0	0	0	d__Bacteria; p__Verrucomicrobiota; c__Verrucomicrobiae; o__Chthoniobacterales; f__Chthoniobacteraceae; g__Candidatus Udaeobacter; s__uncultured bacterium
ASV1379	9	0	31	52	0	0	0	0	d__Bacteria; p__Cyanobacteria; c__Vampirivibrionia; o__Vampirovibrionales; f__Vampirovibrionaceae; g__Vampirovibrio
ASV1380	0	0	0	0	3	5	5	3	d__Bacteria; p__Chloroflexi; c__Chloroflexia; o__Kallotenuales; f__Kallotenuaceae; g__Kallotenue
ASV1381	0	0	0	0	13	18	0	23	d__Bacteria; p__Acidobacteriota; c__Thermoanaerobaculia; o__Thermoanaerobaculales; f__Thermoanaerobaculaceae; g__Subgroup 10; s__uncultured bacterium
ASV1382	0	0	0	0	6	0	0	10	d__Bacteria; p__Acidobacteriota; c__Acidobacteriae; o__Acidobacteriales; f__Acidobacteriaceae (Subgroup 1); g__uncultured; s__uncultured bacterium
ASV1383	0	0	0	0	12	22	18	22	Unclassified
ASV1384	0	0	0	0	20	0	23	0	d__Bacteria; p__Chloroflexi; c__Chloroflexia; o__Thermomicrobiales; f__Thermomicrobiaceae; g__Nitrolancea; s__uncultured bacterium
ASV1385	0	0	0	0	8	12	11	23	d__Bacteria; p__Chloroflexi; c__Anaerolineae; o__Thermoflexales; f__Thermoflexaceae; g__Thermoflexus; s__uncultured bacterium
ASV1386	0	0	0	0	0	0	42	20	d__Bacteria; p__Proteobacteria; c__Alphaproteobacteria; o__Caulobacterales; f__Hyphomonadaceae; g__SWB02; s__uncultured bacterium
ASV1387	44	0	29	23	0	0	0	0	d__Bacteria; p__Proteobacteria; c__Alphaproteobacteria; o__Azospirillales; f__Azospirillaceae; g__Nitrospirillum; s__Nitrospirillum amazonense
ASV1388	0	0	0	0	0	0	0	156	d__Bacteria; p__Desulfobacterota; c__Syntrophobacteria; o__Syntrophobacterales; f__Thermodesulforhabdaceae; g__Thermodesulforhabdus
ASV1389	0	0	0	0	47	0	0	36	d__Bacteria; p__Acidobacteriota; c__Acidobacteriae; o__Acidobacteriales; f__Koribacteraceae; g__Candidatus Koribacter; s__uncultured bacterium
ASV1390	0	0	0	0	0	39	47	33	d__Bacteria; p__Acidobacteriota; c__Thermoanaerobaculia; o__Thermoanaerobaculales; f__Thermoanaerobaculaceae; g__Subgroup 10; s__uncultured bacterium
ASV1391	0	0	0	0	23	13	0	22	d__Bacteria; p__Chloroflexi; c__Anaerolineae; o__Anaerolineales; f__Anaerolineaceae; g__uncultured; s__uncultured bacterium
ASV1392	20	19	10	21	0	0	0	0	d__Bacteria; p__Elusimicrobiota; c__Endomicrobia; o__Endomicrobiales; f__Endomicrobiaceae; g__Endomicrobium; s__uncultured rumen bacterium
ASV1393	0	0	8	0	0	0	0	0	d__Bacteria; p__Planctomycetota; c__Planctomycetes; o__Isosphaerales; f__Isosphaeraceae; g__uncultured; s__uncultured bacterium
ASV1394	0	0	0	0	0	11	0	0	d__Bacteria; p__Bacteroidota; c__Bacteroidia; o__Chitinophagales; f__Chitinophagaceae; g__Flavisolibacter; s__uncultured bacterium
ASV1395	0	0	0	0	6	9	0	0	d__Bacteria; p__Planctomycetota; c__Planctomycetes; o__Planctomycetales; f__Rubinisphaeraceae; g__SH-PL14; s__uncultured bacterium
ASV1396	0	0	0	0	17	15	0	0	d__Bacteria; p__Actinobacteriota; c__Thermoleophilia; o__Gaiellales; f__Gaiellaceae; g__Gaiella; s__uncultured bacterium
ASV1397	16	0	31	17	0	0	0	0	d__Bacteria
ASV1398	18	18	17	0	0	0	0	0	d__Bacteria; p__Proteobacteria; c__Alphaproteobacteria; o__Azospirillales; f__Azospirillaceae; g__Azospirillum
ASV1399	0	0	0	0	0	27	0	0	d__Bacteria; p__Gemmatimonadota; c__Gemmatimonadetes; o__Gemmatimonadales; f__Gemmatimonadaceae; g__Gemmatimonas
ASV1400	0	0	0	0	18	23	22	27	d__Bacteria; p__Proteobacteria; c__Gammaproteobacteria; o__Burkholderiales; f__Nitrosomonadaceae; g__Ellin6067; s__uncultured bacterium
ASV1401	0	9	0	19	0	0	0	0	d__Bacteria; p__Proteobacteria; c__Alphaproteobacteria; o__Acetobacterales; f__Acetobacteraceae
ASV1402	15	42	0	0	0	0	0	0	Unclassified
ASV1403	29	0	0	38	0	0	0	0	d__Bacteria; p__Acidobacteriota; c__Acidobacteriae; o__Acidobacteriales; f__Acidobacteriaceae (Subgroup 1); g__uncultured
ASV1404	0	0	0	0	10	0	0	14	d__Bacteria; p__Acidobacteriota; c__Vicinamibacteria; o__Vicinamibacterales; f__Vicinamibacteraceae; g__Luteitalea; s__uncultured bacterium
ASV1405	0	0	0	0	0	33	0	21	d__Bacteria; p__Gemmatimonadota; c__Gemmatimonadetes; o__Gemmatimonadales; f__Gemmatimonadaceae; g__uncultured; s__uncultured bacterium
ASV1406	24	24	0	40	0	0	0	0	d__Bacteria; p__Planctomycetota; c__Planctomycetes; o__Gemmatales; f__Gemmataceae; g__uncultured; s__uncultured planctomycete
ASV1407	12	7	0	0	0	0	0	0	d__Bacteria
ASV1408	0	20	0	9	0	0	0	0	d__Bacteria; p__Gemmatimonadota; c__Gemmatimonadetes; o__Gemmatimonadales; f__Gemmatimonadaceae; g__Gemmatimonas; s__uncultured bacterium
ASV1409	0	0	0	0	19	11	0	0	d__Bacteria; p__Firmicutes; c__Desulfotomaculia; o__Desulfotomaculales; f__Desulfurisporaceae; g__SCADC1-2-3; s__uncultured bacterium
ASV1410	0	0	8	0	0	0	0	0	d__Bacteria; p__Chloroflexi; c__Anaerolineae
ASV1411	0	0	0	0	21	12	10	21	d__Bacteria; p__Acidobacteriota; c__Blastocatellia; o__Blastocatellales; f__Blastocatellaceae; g__Stenotrophobacter
ASV1412	0	0	0	0	31	15	17	28	d__Bacteria; p__Proteobacteria; c__Alphaproteobacteria; o__Rhodospirillales; f__Magnetospiraceae; g__Magnetospira; s__uncultured bacterium
ASV1413	0	0	0	0	14	17	35	13	d__Bacteria; p__Verrucomicrobiota; c__Verrucomicrobiae; o__Pedosphaerales; f__Pedosphaeraceae
ASV1414	0	0	0	0	14	18	0	20	d__Bacteria; p__Chloroflexi; c__Chloroflexia; o__Chloroflexales; f__Roseiflexaceae; g__uncultured; s__uncultured bacterium
ASV1415	0	0	0	0	0	9	0	0	d__Bacteria; p__Actinobacteriota; c__Actinobacteria; o__Euzebyales; f__Euzebyaceae; g__Euzebya; s__uncultured bacterium
ASV1416	0	0	0	0	5	0	7	8	d__Bacteria; p__Planctomycetota; c__Planctomycetes; o__Pirellulales; f__Pirellulaceae; g__uncultured; s__uncultured bacterium
ASV1417	0	0	36	0	0	0	0	0	d__Bacteria; p__Acidobacteriota; c__Acidobacteriae; o__Bryobacterales; f__Bryobacteraceae; g__Bryobacter; s__uncultured bacterium
ASV1418	0	0	0	0	28	0	9	11	d__Bacteria; p__Chloroflexi; c__Anaerolineae; o__Anaerolineales; f__Anaerolineaceae; g__uncultured; s__uncultured Chloroflexi bacterium
ASV1419	0	0	0	0	14	15	22	0	d__Bacteria; p__Bacteroidota; c__Bacteroidia; o__Chitinophagales; f__Chitinophagaceae; g__Niastella; s__uncultured bacterium
ASV1420	0	20	0	18	0	0	0	0	d__Bacteria; p__Chloroflexi; c__Ktedonobacteria; o__Ktedonobacterales; f__Ktedonobacteraceae; g__1921-3; s__uncultured bacterium
ASV1421	0	0	0	0	3	0	0	0	d__Bacteria; p__Firmicutes; c__Limnochordia; o__Limnochordales; f__Limnochordaceae; g__Limnochorda
ASV1422	0	0	0	0	0	5	0	0	d__Bacteria; p__Gemmatimonadota; c__Gemmatimonadetes; o__Gemmatimonadales; f__Gemmatimonadaceae; g__uncultured; s__uncultured bacterium
ASV1423	0	0	0	0	31	8	14	19	d__Bacteria; p__Acidobacteriota; c__Acidobacteriae; o__Acidobacteriales; f__Acidobacteriaceae (Subgroup 1); g__uncultured; s__uncultured bacterium
ASV1424	0	31	0	0	0	0	0	0	d__Bacteria; p__Proteobacteria; c__Alphaproteobacteria; o__Azospirillales
ASV1425	0	0	0	0	10	0	0	0	d__Bacteria; p__Gemmatimonadota; c__Gemmatimonadetes; o__Gemmatimonadales; f__Gemmatimonadaceae; g__uncultured; s__uncultured bacterium
ASV1426	21	0	0	0	0	0	0	0	d__Bacteria; p__Proteobacteria; c__Alphaproteobacteria; o__Acetobacterales; f__Acetobacteraceae; g__Rhodopila
ASV1427	0	0	14	9	0	0	0	0	d__Bacteria; p__Chloroflexi; c__Ktedonobacteria; o__Ktedonobacterales; f__Ktedonobacteraceae; g__HSB OF53-F07; s__uncultured bacterium
ASV1428	16	15	15	0	0	0	0	0	d__Bacteria; p__Actinobacteriota; c__Acidimicrobiia; o__Microtrichales; f__Ilumatobacteraceae; g__uncultured; s__uncultured bacterium
ASV1429	0	0	0	0	19	15	0	16	d__Bacteria; p__Chloroflexi; c__Anaerolineae; o__Anaerolineales; f__Anaerolineaceae; g__uncultured; s__uncultured bacterium
ASV1430	0	16	12	5	0	0	0	0	d__Bacteria; p__Firmicutes; c__Bacilli; o__Bacillales; f__Bacillaceae; g__Bacillus
ASV1431	0	0	0	0	14	5	28	0	d__Bacteria; p__Chloroflexi; c__Anaerolineae; o__Anaerolineales; f__Anaerolineaceae; g__uncultured; s__uncultured bacterium
ASV1432	0	0	0	0	0	0	0	116	d__Bacteria
ASV1433	19	9	7	17	0	0	0	0	d__Bacteria; p__Firmicutes; c__Negativicutes; o__Acidaminococcales; f__Acidaminococcaceae; g__uncultured; s__uncultured bacterium
ASV1434	0	0	0	0	0	0	59	0	d__Bacteria; p__Actinobacteriota; c__Thermoleophilia; o__Gaiellales; f__Gaiellaceae; g__Gaiella; s__uncultured bacterium
ASV1435	0	0	0	56	0	0	0	0	d__Bacteria; p__Chloroflexi; c__Chloroflexia; o__Thermobaculales; f__Thermobaculaceae; g__Thermobaculum; s__uncultured bacterium
ASV1436	0	6	8	16	0	0	0	0	d__Bacteria; p__Chloroflexi; c__Ktedonobacteria; o__Ktedonobacterales; f__Ktedonobacteraceae; g__1921-3; s__uncultured bacterium
ASV1437	53	23	25	0	0	0	0	0	d__Bacteria; p__Acidobacteriota; c__Acidobacteriae; o__Acidobacteriales; f__Acidobacteriaceae (Subgroup 1); g__uncultured; s__uncultured bacterium
ASV1438	32	0	28	0	0	0	0	0	d__Bacteria; p__Bacteroidota; c__Bacteroidia; o__Sphingobacteriales; f__Sphingobacteriaceae; g__Mucilaginibacter; s__uncultured bacterium
ASV1439	0	0	0	89	0	0	0	0	Unclassified
ASV1440	0	0	0	0	0	0	0	78	d__Bacteria
ASV1441	12	21	14	0	0	0	0	0	d__Bacteria; p__Proteobacteria; c__Gammaproteobacteria; o__Burkholderiales; f__Nitrosomonadaceae
ASV1442	8	15	13	5	0	0	0	0	d__Bacteria; p__Chloroflexi; c__Ktedonobacteria; o__Ktedonobacterales; f__Ktedonobacteraceae; g__HSB OF53-F07; s__uncultured Ktedonobacter sp.
ASV1443	8	8	0	14	0	0	0	0	d__Bacteria; p__Chloroflexi; c__Ktedonobacteria; o__Ktedonobacterales; f__Ktedonobacteraceae; g__uncultured; s__uncultured bacterium
ASV1444	30	16	11	0	0	0	0	0	d__Bacteria; p__Acidobacteriota; c__Acidobacteriae; o__Acidobacteriales; f__Acidobacteriaceae (Subgroup 1); g__uncultured; s__uncultured bacterium
ASV1445	0	0	0	0	0	0	10	22	d__Bacteria
ASV1446	0	0	0	0	11	11	55	0	d__Bacteria; p__Acidobacteriota; c__Thermoanaerobaculia; o__Thermoanaerobaculales; f__Thermoanaerobaculaceae; g__Subgroup 10
ASV1447	0	26	0	0	0	0	0	0	d__Bacteria; p__Firmicutes; c__Bacilli; o__Paenibacillales; f__Paenibacillaceae; g__Paenibacillus
ASV1448	17	0	0	0	0	0	0	0	d__Bacteria; p__Proteobacteria; c__Gammaproteobacteria; o__Burkholderiales; f__Rhodocyclaceae; g__uncultured
ASV1449	0	0	0	0	6	14	9	13	d__Bacteria; p__Actinobacteriota; c__Thermoleophilia; o__Gaiellales; f__Gaiellaceae; g__Gaiella
ASV1450	0	0	0	0	0	0	0	37	d__Bacteria; p__Planctomycetota; c__Planctomycetes; o__Pirellulales; f__Pirellulaceae; g__Pirellula; s__uncultured bacterium
ASV1451	0	0	12	27	0	0	0	0	d__Bacteria; p__Actinobacteriota; c__Actinobacteria; o__Propionibacteriales; f__Nocardioidaceae; g__Nocardioides
ASV1452	0	3	25	18	0	0	0	0	Unclassified
ASV1453	0	0	0	0	15	0	0	0	d__Bacteria; p__Chloroflexi; c__Anaerolineae; o__Anaerolineales; f__Anaerolineaceae; g__RBG-16-58-14; s__uncultured bacterium
ASV1454	0	0	0	0	0	0	21	0	d__Bacteria; p__Chloroflexi; c__Chloroflexia; o__Chloroflexales; f__Roseiflexaceae; g__uncultured; s__uncultured soil bacterium
ASV1455	0	0	0	0	0	15	47	9	d__Bacteria; p__Chloroflexi; c__Anaerolineae; o__SBR1031; f__A4b; g__OLB13
ASV1456	0	0	0	0	19	0	10	20	d__Bacteria; p__Acidobacteriota; c__Blastocatellia; o__Blastocatellales; f__Blastocatellaceae; g__uncultured; s__uncultured Acidobacteria bacterium
ASV1457	35	18	18	11	0	0	0	0	d__Bacteria; p__Proteobacteria; c__Gammaproteobacteria; o__Xanthomonadales; f__Rhodanobacteraceae; g__Rhodanobacter
ASV1458	13	0	24	15	0	0	0	0	d__Bacteria; p__Gemmatimonadota; c__Gemmatimonadetes; o__Gemmatimonadales; f__Gemmatimonadaceae; g__Gemmatimonas; s__uncultured bacterium
ASV1459	41	0	0	0	0	0	0	0	d__Bacteria; p__Actinobacteriota; c__Thermoleophilia; o__Solirubrobacterales; f__Solirubrobacteraceae; g__Conexibacter; s__uncultured bacterium
ASV1460	15	18	20	13	0	0	0	0	Unclassified
ASV1461	0	0	0	185	0	0	0	0	d__Bacteria; p__Acidobacteriota; c__Acidobacteriae; o__Acidobacteriales; f__Acidobacteriaceae (Subgroup 1); g__uncultured; s__uncultured bacterium
ASV1462	0	0	0	16	0	0	0	0	d__Bacteria; p__Acidobacteriota; c__Acidobacteriae; o__Solibacterales; f__Solibacteraceae; g__Candidatus Solibacter
ASV1463	0	27	0	18	0	0	0	0	d__Bacteria; p__Firmicutes; c__Bacilli; o__Bacillales; f__Bacillaceae; g__Bacillus
ASV1464	0	0	0	0	0	0	0	67	d__Bacteria; p__Acidobacteriota; c__Acidobacteriae; o__Acidobacteriales; f__Acidobacteriaceae (Subgroup 1); g__uncultured; s__uncultured bacterium
ASV1465	26	0	7	0	0	0	0	0	d__Bacteria; p__Elusimicrobiota; c__Endomicrobia; o__Endomicrobiales; f__Endomicrobiaceae; g__Endomicrobium; s__uncultured bacterium
ASV1466	0	41	0	0	0	0	0	0	d__Bacteria; p__Planctomycetota; c__Planctomycetes; o__Isosphaerales; f__Isosphaeraceae; g__uncultured; s__uncultured bacterium
ASV1467	0	0	0	0	0	0	3	0	d__Bacteria; p__Proteobacteria; c__Gammaproteobacteria; o__Nitrosococcales; f__Nitrosococcaceae; g__AqS1
ASV1468	0	0	0	0	0	8	0	0	d__Bacteria; p__Chloroflexi; c__Anaerolineae; o__Anaerolineales; f__Anaerolineaceae; g__uncultured; s__uncultured bacterium
ASV1469	0	0	0	0	7	9	0	13	d__Bacteria; p__Chloroflexi; c__Anaerolineae; o__Anaerolineales; f__Anaerolineaceae; g__Anaerolinea
ASV1470	0	0	0	0	0	14	22	0	d__Bacteria; p__Gemmatimonadota; c__Gemmatimonadetes; o__Gemmatimonadales; f__Gemmatimonadaceae; g__Gemmatimonas
ASV1471	10	7	6	15	0	0	0	0	d__Bacteria; p__Chloroflexi; c__Ktedonobacteria; o__Ktedonobacterales; f__Ktedonobacteraceae; g__HSB OF53-F07
ASV1472	35	0	0	41	0	0	0	0	d__Bacteria; p__Verrucomicrobiota; c__Verrucomicrobiae; o__Pedosphaerales; f__Pedosphaeraceae; g__ADurb.Bin063-1
ASV1473	0	0	0	0	37	0	0	0	d__Bacteria; p__Proteobacteria; c__Alphaproteobacteria; o__Rhizobiales; f__Xanthobacteraceae; g__uncultured; s__uncultured bacterium
ASV1474	0	0	0	0	15	13	0	0	d__Bacteria; p__Chloroflexi; c__Chloroflexia; o__Thermomicrobiales; f__Thermomicrobiaceae; g__Nitrolancea; s__uncultured bacterium
ASV1475	0	0	0	0	8	8	0	0	d__Bacteria; p__Verrucomicrobiota; c__Verrucomicrobiae; o__Chthoniobacterales; f__Chthoniobacteraceae; g__Candidatus Udaeobacter; s__uncultured bacterium
ASV1476	0	0	0	0	0	37	54	0	d__Bacteria; p__Actinobacteriota; c__Thermoleophilia; o__Gaiellales; f__Gaiellaceae; g__Gaiella; s__uncultured bacterium
ASV1477	0	0	0	0	0	14	4	7	d__Bacteria; p__Gemmatimonadota; c__Gemmatimonadetes; o__Gemmatimonadales; f__Gemmatimonadaceae; g__uncultured; s__uncultured bacterium
ASV1478	0	0	0	0	0	33	0	0	Unclassified
ASV1479	12	29	10	0	0	0	0	0	Unclassified
ASV1480	0	0	0	0	0	23	13	18	d__Bacteria; p__Acidobacteriota
ASV1481	31	19	0	24	0	0	0	0	Unclassified
ASV1482	0	0	0	0	0	2	0	0	d__Bacteria; p__Proteobacteria; c__Gammaproteobacteria; o__Chromatiales; f__Sedimenticolaceae; g__Sedimenticola
ASV1483	0	36	17	0	0	0	0	0	d__Bacteria; p__Proteobacteria; c__Alphaproteobacteria; o__Rhizobiales; f__Hyphomicrobiaceae; g__Pedomicrobium; s__uncultured bacterium
ASV1484	0	0	0	0	7	19	18	8	d__Bacteria; p__Chloroflexi; c__Chloroflexia; o__Chloroflexales; f__Roseiflexaceae; g__uncultured; s__uncultured bacterium
ASV1485	0	17	0	7	0	0	0	0	d__Bacteria; p__Actinobacteriota; c__Acidimicrobiia; o__Acidimicrobiales; f__Acidimicrobiaceae; g__Acidimicrobium; s__uncultured bacterium
ASV1486	0	0	0	5	0	0	0	0	d__Bacteria; p__Planctomycetota; c__Planctomycetes; o__Isosphaerales; f__Isosphaeraceae; g__Paludisphaera; s__Paludisphaera borealis
ASV1487	49	19	6	19	0	0	0	0	d__Bacteria; p__Acidobacteriota; c__Acidobacteriae; o__Acidobacteriales; f__Acidobacteriaceae (Subgroup 1); g__uncultured; s__uncultured bacterium
ASV1488	0	0	0	0	0	8	50	25	d__Bacteria; p__Methylomirabilota; c__Methylomirabilia; o__Methylomirabilales; f__Methylomirabilaceae
ASV1489	0	0	0	17	0	0	0	0	d__Bacteria; p__Bacteroidota; c__Bacteroidia; o__Chitinophagales; f__Chitinophagaceae; g__uncultured
ASV1490	0	0	0	0	0	10	4	0	d__Bacteria; p__Myxococcota; c__Myxococcia; o__Myxococcales; f__Anaeromyxobacteraceae; g__Anaeromyxobacter; s__uncultured bacterium
ASV1491	0	0	0	0	10	0	0	0	d__Bacteria
ASV1492	0	0	0	0	8	0	0	0	d__Bacteria; p__Chloroflexi; c__Anaerolineae; o__Anaerolineales; f__Anaerolineaceae; g__Longilinea; s__uncultured bacterium
ASV1493	0	0	0	0	21	0	31	0	d__Bacteria; p__Actinobacteriota; c__Acidimicrobiia; o__Microtrichales; f__Iamiaceae; g__Iamia
ASV1494	0	11	17	0	0	0	0	0	d__Bacteria; p__Chloroflexi; c__Ktedonobacteria; o__Ktedonobacterales; f__Ktedonobacteraceae; g__1921-2; s__uncultured bacterium
ASV1495	0	0	0	0	14	0	0	0	d__Bacteria; p__Proteobacteria; c__Gammaproteobacteria; o__Gammaproteobacteria Incertae Sedis; f__Unknown Family; g__Acidibacter; s__uncultured bacterium
ASV1496	0	0	0	0	0	14	16	0	d__Bacteria; p__Gemmatimonadota; c__Gemmatimonadetes; o__Gemmatimonadales; f__Gemmatimonadaceae; g__uncultured; s__uncultured bacterium
ASV1497	0	0	0	0	0	19	19	15	d__Bacteria; p__Planctomycetota; c__Planctomycetes; o__Gemmatales; f__Gemmataceae; g__uncultured; s__uncultured bacterium
ASV1498	0	0	0	0	0	0	8	7	d__Bacteria; p__Actinobacteriota; c__Acidimicrobiia; o__Microtrichales; f__Iamiaceae; g__Iamia
ASV1499	13	10	0	12	0	0	0	0	d__Bacteria; p__Proteobacteria; c__Alphaproteobacteria; o__Azospirillales; f__Azospirillaceae; g__Azospirillum
ASV1500	0	0	0	0	0	0	0	23	d__Bacteria; p__Actinobacteriota; c__Actinobacteria; o__Pseudonocardiales; f__Pseudonocardiaceae; g__Pseudonocardia
ASV1501	0	0	0	0	0	0	0	79	d__Bacteria; p__Acidobacteriota; c__Vicinamibacteria; o__Vicinamibacterales; f__Vicinamibacteraceae; g__Luteitalea; s__uncultured bacterium
ASV1502	0	0	0	0	12	18	20	14	d__Bacteria; p__Gemmatimonadota; c__Longimicrobia; o__Longimicrobiales; f__Longimicrobiaceae; g__YC-ZSS-LKJ147; s__uncultured bacterium
ASV1503	0	0	0	0	0	5	0	0	Unclassified
ASV1504	0	0	0	0	22	0	0	29	d__Bacteria; p__Acidobacteriota; c__Vicinamibacteria; o__Vicinamibacterales; f__Vicinamibacteraceae; g__Vicinamibacter
ASV1505	0	0	0	0	0	7	0	0	d__Bacteria; p__Chloroflexi; c__Anaerolineae; o__Anaerolineales; f__Anaerolineaceae; g__uncultured; s__uncultured bacterium
ASV1506	0	0	0	0	12	9	0	0	d__Bacteria; p__Acidobacteriota; c__Acidobacteriae; o__Acidobacteriales; f__Acidobacteriaceae (Subgroup 1); g__uncultured; s__uncultured bacterium
ASV1507	0	0	0	0	13	0	23	49	d__Bacteria; p__Desulfobacterota; c__Syntrophobacteria; o__Syntrophobacterales; f__Thermodesulforhabdaceae; g__Thermodesulforhabdus
ASV1508	12	8	11	12	0	0	0	0	d__Bacteria; p__Chloroflexi; c__Ktedonobacteria; o__Ktedonobacterales; f__Ktedonobacteraceae; g__BacC-u-018
ASV1509	0	0	0	0	11	10	16	0	d__Bacteria; p__Proteobacteria; c__Alphaproteobacteria; o__Rhizobiales; f__Beijerinckiaceae; g__Microvirga
ASV1510	0	0	0	0	30	0	0	0	d__Bacteria; p__Acidobacteriota; c__Thermoanaerobaculia; o__Thermoanaerobaculales; f__Thermoanaerobaculaceae; g__Subgroup 10
ASV1511	0	0	0	0	26	0	10	0	d__Bacteria; p__Acidobacteriota
ASV1512	0	16	2	11	0	0	0	0	Unclassified
ASV1513	13	0	0	0	0	0	0	0	d__Bacteria; p__Chloroflexi; c__Ktedonobacteria; o__Ktedonobacterales; f__Ktedonobacteraceae; g__Ktedonobacter
ASV1514	0	0	13	0	0	0	0	0	d__Bacteria; p__Firmicutes; c__Bacilli; o__Paenibacillales; f__Paenibacillaceae; g__Paenibacillus; s__uncultured bacterium
ASV1515	16	12	10	10	0	0	0	0	d__Bacteria; p__Chloroflexi; c__Ktedonobacteria; o__Ktedonobacterales; f__Ktedonobacteraceae; g__HSB OF53-F07; s__uncultured Ktedonobacter sp.
ASV1516	0	0	0	0	0	0	0	16	d__Bacteria; p__Chloroflexi; c__Anaerolineae; o__Anaerolineales; f__Anaerolineaceae; g__uncultured; s__uncultured bacterium
ASV1517	0	0	0	0	10	0	0	24	d__Bacteria; p__Planctomycetota; c__Phycisphaerae; o__Tepidisphaerales; f__Tepidisphaeraceae; g__Tepidisphaera; s__uncultured bacterium
ASV1518	0	0	0	0	0	17	0	12	d__Bacteria; p__Chloroflexi; c__Anaerolineae; o__Anaerolineales; f__Anaerolineaceae; g__uncultured; s__uncultured bacterium
ASV1519	0	0	0	0	0	4	7	0	d__Bacteria; p__Acidobacteriota; c__Vicinamibacteria; o__Vicinamibacterales; f__Vicinamibacteraceae; g__Luteitalea; s__uncultured bacterium
ASV1520	29	16	21	53	0	0	0	0	d__Bacteria; p__Acidobacteriota; c__Acidobacteriae; o__Acidobacteriales; f__Acidobacteriaceae (Subgroup 1); g__uncultured
ASV1521	0	0	0	0	0	0	34	14	d__Bacteria; p__Gemmatimonadota; c__Gemmatimonadetes; o__Gemmatimonadales; f__Gemmatimonadaceae; g__uncultured; s__metagenome
ASV1522	17	0	0	0	0	0	0	0	d__Bacteria; p__Acidobacteriota; c__Acidobacteriae; o__Acidobacteriales; f__Acidobacteriaceae (Subgroup 1); g__Granulicella
ASV1523	0	0	0	0	31	0	0	0	d__Bacteria; p__Acidobacteriota; c__Blastocatellia; o__Pyrinomonadales; f__Pyrinomonadaceae; g__RB41; s__uncultured bacterium
ASV1524	0	0	0	0	12	0	0	0	d__Bacteria; p__Acidobacteriota; c__Vicinamibacteria; o__Vicinamibacterales; f__Vicinamibacteraceae; g__Luteitalea; s__uncultured bacterium
ASV1525	0	0	0	0	16	0	20	0	d__Bacteria; p__Firmicutes; c__Desulfotomaculia; o__Ammonifexales; f__Ammonificaceae
ASV1526	0	0	0	0	0	6	0	0	d__Bacteria; p__Fibrobacterota; c__Fibrobacteria; o__Fibrobacterales; f__Fibrobacteraceae; g__possible genus 04; s__uncultured bacterium
ASV1527	9	0	0	0	0	0	0	0	d__Bacteria; p__Firmicutes; c__Clostridia; o__Caldicoprobacterales; f__Caldicoprobacteraceae; g__Caldicoprobacter
ASV1528	12	15	28	10	0	0	0	0	d__Bacteria; p__Firmicutes; c__Natranaerobiia; o__Natranaerobiales; f__Natranaerobiaceae
ASV1529	8	12	7	5	0	0	0	0	Unclassified
ASV1530	0	0	16	0	0	0	0	0	d__Bacteria; p__Desulfobacterota; c__Desulfomonilia; o__Desulfomonilales; f__Desulfomonilaceae; g__Desulfomonile
ASV1531	0	0	13	0	0	0	0	0	d__Bacteria; p__Proteobacteria; c__Alphaproteobacteria; o__Rhizobiales; f__Xanthobacteraceae; g__Afipia; s__uncultured bacterium
ASV1532	0	0	0	0	4	0	16	20	d__Bacteria; p__Armatimonadota; c__Chthonomonadetes; o__Chthonomonadales; f__Chthonomonadaceae; g__Chthonomonas; s__uncultured bacterium
ASV1533	0	0	0	0	14	22	0	0	d__Bacteria; p__Bacteroidota; c__Bacteroidia; o__Cytophagales; f__Hymenobacteraceae; g__Pontibacter; s__uncultured bacterium
ASV1534	0	0	0	0	0	0	0	45	d__Bacteria; p__Acidobacteriota; c__Blastocatellia; o__Pyrinomonadales; f__Pyrinomonadaceae; g__RB41; s__uncultured bacterium
ASV1535	0	0	0	0	0	0	0	25	d__Bacteria; p__Acidobacteriota
ASV1536	22	0	8	0	0	0	0	0	d__Bacteria; p__Chloroflexi; c__Anaerolineae
ASV1537	0	0	0	0	0	0	4	0	d__Bacteria; p__Actinobacteriota; c__Acidimicrobiia; o__Microtrichales; f__Microtrichaceae; g__Sva0996 marine group
ASV1538	0	0	0	0	25	0	34	11	d__Bacteria; p__Verrucomicrobiota; c__Verrucomicrobiae; o__Pedosphaerales; f__Pedosphaeraceae
ASV1539	0	22	22	0	0	0	0	0	d__Bacteria; p__Proteobacteria; c__Gammaproteobacteria; o__Gammaproteobacteria Incertae Sedis; f__Unknown Family; g__Acidibacter; s__uncultured bacterium
ASV1540	20	0	18	16	0	0	0	0	d__Bacteria; p__Proteobacteria; c__Alphaproteobacteria; o__Azospirillales; f__Inquilinaceae; g__Inquilinus
ASV1541	0	0	0	0	4	13	0	0	d__Bacteria; p__Nitrospirota; c__Nitrospiria; o__Nitrospirales; f__Nitrospiraceae; g__Nitrospira
ASV1542	0	0	0	0	20	0	0	0	d__Bacteria; p__Chloroflexi; c__Anaerolineae; o__Caldilineales; f__Caldilineaceae; g__uncultured; s__uncultured bacterium
ASV1543	0	0	0	0	12	15	0	0	d__Bacteria; p__Chloroflexi; c__Chloroflexia; o__Chloroflexales; f__Roseiflexaceae; g__uncultured; s__uncultured bacterium
ASV1544	0	0	0	0	6	0	0	0	d__Bacteria; p__Chloroflexi; c__Anaerolineae; o__Anaerolineales; f__Anaerolineaceae; g__Anaerolinea
ASV1545	0	0	0	0	0	0	8	10	d__Bacteria; p__Verrucomicrobiota; c__Verrucomicrobiae; o__Pedosphaerales; f__Pedosphaeraceae; g__DEV008; s__uncultured bacterium
ASV1546	0	0	0	0	0	0	0	23	d__Bacteria; p__Planctomycetota; c__Planctomycetes; o__Pirellulales; f__Pirellulaceae; g__Pirellula; s__uncultured planctomycete
ASV1547	0	0	0	0	0	15	0	0	d__Bacteria; p__Proteobacteria; c__Gammaproteobacteria; o__Burkholderiales; f__Methylophilaceae; g__uncultured; s__uncultured bacterium
ASV1548	0	0	12	14	0	0	0	0	d__Bacteria; p__Gemmatimonadota; c__Gemmatimonadetes; o__Gemmatimonadales; f__Gemmatimonadaceae; g__Gemmatimonas; s__uncultured bacterium
ASV1549	0	0	0	0	20	11	4	34	d__Bacteria; p__Myxococcota; c__Polyangia; o__Polyangiales; f__Phaselicystidaceae; g__Phaselicystis; s__uncultured bacterium
ASV1550	0	0	0	0	18	0	0	0	d__Bacteria; p__Proteobacteria; c__Alphaproteobacteria; o__Caulobacterales; f__Caulobacteraceae; g__uncultured
ASV1551	0	0	21	0	0	0	0	0	d__Bacteria; p__Chloroflexi; c__Ktedonobacteria; o__Ktedonobacterales; f__Ktedonobacteraceae; g__1921-2; s__uncultured bacterium
ASV1552	0	0	0	0	22	0	0	30	d__Bacteria; p__Firmicutes; c__Bacilli; o__Bacillales; f__Bacillaceae; g__Bacillus; s__uncultured bacterium
ASV1553	0	0	0	0	0	0	23	0	d__Bacteria; p__Acidobacteriota; c__Vicinamibacteria; o__Vicinamibacterales; f__Vicinamibacteraceae; g__Luteitalea
ASV1554	0	0	0	0	17	7	7	0	d__Bacteria; p__Armatimonadota; c__Chthonomonadetes; o__Chthonomonadales; f__Chthonomonadaceae; g__Chthonomonas; s__uncultured Armatimonadetes bacterium
ASV1555	0	0	0	0	18	8	8	19	d__Bacteria; p__Gemmatimonadota; c__Gemmatimonadetes; o__Gemmatimonadales; f__Gemmatimonadaceae; g__uncultured; s__uncultured bacterium
ASV1556	0	29	25	0	0	0	0	0	d__Bacteria; p__Chloroflexi; c__Ktedonobacteria; o__Ktedonobacterales; f__Ktedonobacteraceae; g__1921-3; s__uncultured Ktedonobacter sp.
ASV1557	0	0	0	0	0	12	12	21	d__Bacteria; p__Actinobacteriota; c__Actinobacteria; o__Streptomycetales; f__Streptomycetaceae; g__Streptomyces
ASV1558	27	0	19	0	0	0	0	0	d__Bacteria; p__Chloroflexi; c__Ktedonobacteria; o__Ktedonobacterales; f__Ktedonobacteraceae; g__1921-3; s__uncultured bacterium
ASV1559	22	19	0	14	0	0	0	0	d__Bacteria; p__Chloroflexi; c__Ktedonobacteria; o__Ktedonobacterales; f__Ktedonobacteraceae; g__G12-WMSP1; s__uncultured Ktedonobacter sp.
ASV1560	0	0	0	0	0	8	3	0	d__Bacteria; p__Proteobacteria; c__Alphaproteobacteria; o__Rhodobacterales; f__Rhodobacteraceae; g__Rubellimicrobium; s__uncultured bacterium
ASV1561	0	30	12	23	0	0	0	0	d__Bacteria; p__Planctomycetota; c__Planctomycetes; o__Gemmatales; f__Gemmataceae; g__uncultured; s__uncultured planctomycete
ASV1562	0	0	0	0	12	0	14	16	d__Bacteria; p__Acidobacteriota; c__Vicinamibacteria; o__Vicinamibacterales; f__Vicinamibacteraceae; g__Luteitalea; s__uncultured Acidobacteria bacterium
ASV1563	0	0	0	0	0	18	23	0	d__Bacteria; p__Proteobacteria; c__Alphaproteobacteria; o__Defluviicoccales; f__Defluviicoccaceae; g__Defluviicoccus; s__uncultured bacterium
ASV1564	0	0	0	0	26	0	8	23	d__Bacteria; p__Proteobacteria; c__Gammaproteobacteria; o__Nitrosococcales; f__Nitrosococcaceae; g__AqS1
ASV1565	14	12	9	0	0	0	0	0	d__Bacteria; p__Firmicutes; c__Bacilli; o__Thermoactinomycetales; f__Thermoactinomycetaceae
ASV1566	0	29	25	0	0	0	0	0	d__Bacteria; p__Gemmatimonadota; c__Gemmatimonadetes; o__Gemmatimonadales; f__Gemmatimonadaceae; g__uncultured
ASV1567	45	0	0	0	0	0	0	0	d__Bacteria; p__Chloroflexi; c__Ktedonobacteria; o__Ktedonobacterales; f__Ktedonobacteraceae; g__1959-1; s__uncultured bacterium
ASV1568	0	0	17	0	0	0	0	0	d__Bacteria; p__Chloroflexi; c__Anaerolineae; o__Anaerolineales; f__Anaerolineaceae
ASV1569	0	0	0	0	0	16	9	0	d__Bacteria; p__Bacteroidota; c__Bacteroidia; o__Chitinophagales; f__Chitinophagaceae; g__Flavisolibacter
ASV1570	0	0	0	0	0	0	21	0	d__Bacteria; p__Planctomycetota; c__Planctomycetes; o__Pirellulales; f__Pirellulaceae; g__uncultured; s__uncultured bacterium
ASV1571	0	9	18	11	0	0	0	0	d__Bacteria; p__Bacteroidota; c__Bacteroidia; o__Flavobacteriales; f__Crocinitomicaceae; g__Fluviicola; s__uncultured bacterium
ASV1572	7	6	12	0	0	0	17	0	d__Bacteria; p__Proteobacteria; c__Alphaproteobacteria; o__Rhizobiales; f__Rhizobiales Incertae Sedis; g__Nordella; s__uncultured bacterium
ASV1573	45	19	0	27	0	0	0	0	d__Bacteria; p__Acidobacteriota; c__Acidobacteriae; o__Acidobacteriales; f__Acidobacteriaceae (Subgroup 1); g__uncultured; s__uncultured bacterium
ASV1574	21	21	0	10	0	0	0	0	d__Bacteria; p__Actinobacteriota; c__Actinobacteria; o__Catenulisporales; f__Catenulisporaceae; g__Catenulispora; s__Catenulispora sp.
ASV1575	23	13	11	0	0	0	0	0	d__Bacteria; p__Acidobacteriota; c__Acidobacteriae; o__Acidobacteriales; f__Acidobacteriaceae (Subgroup 1)
ASV1576	23	15	0	12	0	0	0	0	d__Bacteria; p__Proteobacteria; c__Alphaproteobacteria; o__Rhizobiales; f__Rhizobiales Incertae Sedis; g__Phreatobacter; s__uncultured bacterium
ASV1577	0	0	0	0	0	0	9	21	d__Bacteria; p__Proteobacteria; c__Gammaproteobacteria; o__Pseudomonadales; f__Halomonadaceae; g__Kushneria
ASV1578	0	0	0	0	12	0	8	0	d__Bacteria; p__Firmicutes
ASV1579	0	0	0	0	18	0	31	14	d__Bacteria; p__Proteobacteria; c__Alphaproteobacteria; o__Rhizobiales; f__Xanthobacteraceae; g__Pseudolabrys; s__uncultured bacterium
ASV1580	0	0	0	0	35	0	49	35	d__Bacteria; p__Myxococcota; c__Polyangia; o__Haliangiales; f__Haliangiaceae; g__Haliangium; s__uncultured bacterium
ASV1581	0	0	0	0	0	0	14	0	d__Bacteria; p__Proteobacteria; c__Gammaproteobacteria; o__Burkholderiales; f__Nitrosomonadaceae; g__MND1
ASV1582	26	0	0	38	0	0	0	0	d__Bacteria; p__Actinobacteriota; c__Actinobacteria; o__Frankiales; f__Acidothermaceae; g__Acidothermus; s__uncultured bacterium
ASV1583	0	0	9	0	10	0	0	31	d__Bacteria
ASV1584	0	0	0	0	9	7	17	7	d__Bacteria; p__Proteobacteria; c__Gammaproteobacteria; o__Burkholderiales
ASV1585	0	0	0	0	0	5	0	0	d__Bacteria; p__Proteobacteria; c__Alphaproteobacteria; o__Defluviicoccales; f__Defluviicoccaceae; g__Defluviicoccus; s__uncultured bacterium
ASV1586	0	0	0	0	0	7	15	22	d__Bacteria; p__Chloroflexi; c__Anaerolineae; o__Anaerolineales; f__Anaerolineaceae; g__uncultured; s__uncultured Chloroflexi bacterium
ASV1587	6	13	3	9	0	0	0	0	Unclassified
ASV1588	15	18	11	8	0	0	0	0	d__Bacteria; p__Gemmatimonadota; c__Gemmatimonadetes; o__Gemmatimonadales; f__Gemmatimonadaceae; g__uncultured; s__uncultured bacterium
ASV1589	17	0	0	0	0	0	0	0	d__Bacteria; p__Chloroflexi; c__Ktedonobacteria; o__Ktedonobacterales; f__Ktedonobacteraceae; g__Ktedonobacter
ASV1590	0	0	0	0	0	0	89	0	d__Bacteria; p__Proteobacteria; c__Gammaproteobacteria; o__Burkholderiales; f__Rhodocyclaceae; g__Sulfuritalea; s__uncultured bacterium
ASV1591	12	34	0	0	0	0	0	0	d__Bacteria
ASV1592	0	0	8	6	0	0	0	0	d__Bacteria; p__Bacteroidota; c__Bacteroidia; o__Cytophagales; f__Cytophagaceae; g__Sporocytophaga; s__uncultured bacterium
ASV1593	0	0	0	51	0	0	0	0	d__Bacteria; p__Planctomycetota; c__Planctomycetes; o__Pirellulales; f__Pirellulaceae; g__uncultured; s__uncultured forest soil bacterium
ASV1594	0	0	0	0	25	0	0	31	d__Bacteria; p__Bacteroidota; c__Bacteroidia; o__Chitinophagales; f__Chitinophagaceae; g__uncultured; s__uncultured bacterium
ASV1595	33	0	0	65	0	0	0	0	d__Bacteria
ASV1596	0	0	32	0	0	0	0	0	d__Bacteria; p__Actinobacteriota; c__Actinobacteria; o__Frankiales; f__Acidothermaceae; g__Acidothermus; s__uncultured bacterium
ASV1597	0	0	0	0	57	0	0	0	d__Bacteria; p__Actinobacteriota; c__Thermoleophilia; o__Gaiellales; f__Gaiellaceae; g__Gaiella; s__uncultured bacterium
ASV1598	0	0	6	0	0	0	0	0	d__Bacteria; p__Gemmatimonadota; c__Gemmatimonadetes; o__Gemmatimonadales; f__Gemmatimonadaceae; g__uncultured; s__uncultured bacterium
ASV1599	0	0	0	0	9	0	0	0	d__Bacteria; p__Planctomycetota; c__Planctomycetes; o__Gemmatales; f__Gemmataceae; g__uncultured; s__uncultured bacterium
ASV1600	0	0	0	0	28	0	0	0	d__Bacteria; p__Chloroflexi; c__Chloroflexia; o__Chloroflexales; f__Roseiflexaceae; g__uncultured; s__uncultured bacterium
ASV1601	10	0	11	0	0	0	0	0	d__Bacteria; p__Proteobacteria; c__Alphaproteobacteria; o__Rhizobiales; f__Rhizobiaceae; g__Falsochrobactrum
ASV1602	29	0	0	0	0	0	0	0	d__Bacteria; p__Acidobacteriota; c__Acidobacteriae; o__Acidobacteriales; f__Acidobacteriaceae (Subgroup 1); g__uncultured; s__uncultured bacterium
ASV1603	0	0	22	12	0	0	0	0	d__Bacteria; p__Bdellovibrionota; c__Oligoflexia; o__Oligoflexales; f__Oligoflexaceae; g__Oligoflexus
ASV1604	0	0	0	0	0	0	0	11	d__Bacteria; p__Proteobacteria; c__Gammaproteobacteria; o__Burkholderiales
ASV1605	0	0	0	0	25	25	29	0	d__Bacteria; p__Gemmatimonadota; c__Gemmatimonadetes; o__Gemmatimonadales; f__Gemmatimonadaceae; g__uncultured; s__uncultured bacterium
ASV1606	0	0	0	0	0	9	7	5	d__Bacteria; p__Chloroflexi; c__Chloroflexia; o__Chloroflexales; f__Roseiflexaceae; g__uncultured; s__uncultured bacterium
ASV1607	0	0	0	0	0	0	8	0	d__Bacteria; p__Gemmatimonadota; c__Longimicrobia; o__Longimicrobiales; f__Longimicrobiaceae; g__Longimicrobium
ASV1608	0	11	0	0	0	0	0	0	Unclassified
ASV1609	9	0	9	0	0	0	0	0	d__Bacteria; p__Firmicutes; c__Desulfotomaculia; o__Desulfotomaculales; f__Desulfurisporaceae; g__SCADC1-2-3; s__uncultured bacterium
ASV1610	20	0	0	0	0	0	0	0	Unclassified
ASV1611	13	9	0	0	0	0	0	0	Unclassified
ASV1612	14	14	0	0	0	0	0	0	d__Bacteria; p__Chloroflexi; c__Ktedonobacteria; o__Ktedonobacterales; f__Ktedonobacteraceae; g__BacC-u-018; s__uncultured bacterium
ASV1613	0	0	0	0	0	16	0	0	d__Bacteria; p__Acidobacteriota; c__Vicinamibacteria; o__Vicinamibacterales; f__Vicinamibacteraceae; g__uncultured
ASV1614	0	0	0	0	0	25	0	0	d__Bacteria; p__Proteobacteria; c__Gammaproteobacteria; o__Steroidobacterales; f__Woeseiaceae; g__Woeseia; s__uncultured bacterium
ASV1615	0	0	0	0	6	0	34	0	d__Bacteria; p__Firmicutes; c__Bacilli; o__Lactobacillales; f__Listeriaceae; g__Listeria; s__Listeria welshimeri
ASV1616	0	0	0	11	0	0	0	0	d__Bacteria; p__Acidobacteriota; c__Vicinamibacteria; o__Vicinamibacterales; f__Vicinamibacteraceae; g__Luteitalea; s__uncultured bacterium
ASV1617	9	4	8	14	0	0	0	0	d__Bacteria; p__Chloroflexi; c__Ktedonobacteria; o__Ktedonobacterales; f__Ktedonobacteraceae; g__HSB OF53-F07
ASV1618	9	10	6	18	0	0	0	0	d__Bacteria; p__Patescibacteria; c__Saccharimonadia; o__Saccharimonadales; f__Saccharimonadaceae; g__TM7x; s__uncultured bacterium
ASV1619	11	0	36	0	0	0	0	0	d__Bacteria; p__Chloroflexi; c__Ktedonobacteria; o__Ktedonobacterales; f__Ktedonobacteraceae; g__HSB OF53-F07; s__uncultured Ktedonobacter sp.
ASV1620	0	0	0	0	0	0	11	15	d__Bacteria; p__Chloroflexi; c__Anaerolineae; o__Anaerolineales; f__Anaerolineaceae
ASV1621	0	0	0	0	0	0	41	0	d__Bacteria; p__Gemmatimonadota; c__Gemmatimonadetes; o__Gemmatimonadales; f__Gemmatimonadaceae; g__uncultured; s__uncultured bacterium
ASV1622	0	0	0	0	0	0	0	28	d__Bacteria; p__Methylomirabilota; c__Methylomirabilia; o__Methylomirabilales; f__Methylomirabilaceae; g__wb1-A12
ASV1623	0	0	7	0	0	0	0	0	d__Bacteria; p__Proteobacteria; c__Alphaproteobacteria; o__Azospirillales; f__Azospirillaceae; g__Skermanella; s__uncultured bacterium
ASV1624	0	0	0	0	0	0	0	10	d__Bacteria; p__Actinobacteriota; c__Acidimicrobiia; o__Acidimicrobiales; f__Acidimicrobiales Incertae Sedis; g__Aciditerrimonas
ASV1625	0	35	0	0	0	0	0	0	d__Bacteria; p__Actinobacteriota; c__Actinobacteria; o__Frankiales; f__Acidothermaceae; g__Acidothermus; s__uncultured bacterium
ASV1626	12	44	0	0	0	0	0	0	d__Bacteria; p__Acidobacteriota; c__Acidobacteriae; o__Bryobacterales; f__Bryobacteraceae; g__Bryobacter; s__uncultured bacterium
ASV1627	0	0	0	0	0	13	8	0	d__Bacteria; p__Chloroflexi; c__Anaerolineae; o__Anaerolineales; f__Anaerolineaceae; g__uncultured
ASV1628	0	0	0	0	19	36	0	0	d__Bacteria; p__Acidobacteriota; c__Vicinamibacteria; o__Vicinamibacterales; f__Vicinamibacteraceae; g__Vicinamibacter; s__uncultured bacterium
ASV1629	0	89	0	0	0	0	0	0	d__Bacteria; p__Desulfobacterota
ASV1630	0	0	0	12	0	0	0	0	d__Bacteria; p__Chloroflexi; c__Ktedonobacteria; o__Ktedonobacterales; f__Ktedonobacteraceae; g__HSB OF53-F07; s__uncultured Ktedonobacter sp.
ASV1631	0	0	0	0	0	0	19	11	d__Bacteria; p__Chloroflexi; c__Anaerolineae; o__SBR1031; f__A4b; g__OLB13
ASV1632	0	16	10	7	0	0	0	0	d__Bacteria; p__Patescibacteria; c__Saccharimonadia; o__Saccharimonadales; f__Saccharimonadaceae; g__Candidatus Saccharimonas; s__uncultured bacterium
ASV1633	0	24	0	0	0	0	0	0	d__Bacteria; p__Proteobacteria; c__Alphaproteobacteria; o__Caulobacterales; f__Caulobacteraceae; g__Phenylobacterium; s__uncultured bacterium
ASV1634	8	8	11	11	0	0	0	0	d__Bacteria; p__Planctomycetota; c__Planctomycetes; o__Gemmatales; f__Gemmataceae; g__uncultured
ASV1635	0	0	0	0	31	0	0	29	d__Bacteria; p__Acidobacteriota; c__Vicinamibacteria; o__Vicinamibacterales; f__Vicinamibacteraceae; g__Vicinamibacter
ASV1636	0	0	0	0	13	4	10	0	d__Bacteria; p__Chloroflexi; c__Chloroflexia; o__Chloroflexales; f__Roseiflexaceae; g__uncultured; s__uncultured bacterium
ASV1637	13	11	9	0	0	0	0	0	d__Bacteria; p__Firmicutes; c__Bacilli; o__Bacillales; f__Bacillaceae; g__Ureibacillus
ASV1638	0	0	0	0	0	14	0	0	d__Bacteria; p__Actinobacteriota; c__Acidimicrobiia; o__Microtrichales; f__Ilumatobacteraceae; g__uncultured; s__uncultured bacterium
ASV1639	0	0	0	0	21	26	0	0	d__Bacteria; p__Actinobacteriota; c__Thermoleophilia; o__Gaiellales; f__Gaiellaceae; g__Gaiella; s__uncultured bacterium
ASV1640	0	0	0	54	0	0	0	0	d__Bacteria; p__Planctomycetota; c__Planctomycetes; o__Gemmatales; f__Gemmataceae; g__uncultured
ASV1641	0	0	0	0	10	0	36	0	d__Bacteria; p__Chloroflexi; c__Anaerolineae; o__Caldilineales; f__Caldilineaceae; g__uncultured; s__uncultured bacterium
ASV1642	0	0	0	0	4	0	0	0	d__Bacteria; p__Bacteroidota; c__Bacteroidia; o__Cytophagales; f__Microscillaceae; g__uncultured
ASV1643	0	0	0	34	0	0	0	0	Unclassified
ASV1644	0	0	0	0	0	0	0	54	d__Bacteria; p__Acidobacteriota; c__Vicinamibacteria; o__Vicinamibacterales; f__Vicinamibacteraceae; g__uncultured; s__uncultured Acidobacteria bacterium
ASV1645	0	0	0	54	0	0	0	0	d__Bacteria; p__Firmicutes; c__Bacilli; o__Caldalkalibacillales; f__Caldalkalibacillaceae; g__Caldalkalibacillus
ASV1646	0	0	20	0	0	0	0	0	d__Bacteria; p__Planctomycetota; c__Planctomycetes; o__Gemmatales; f__Gemmataceae; g__uncultured; s__uncultured planctomycete
ASV1647	36	12	11	31	0	0	0	0	Unclassified
ASV1648	0	0	0	0	0	11	0	0	d__Bacteria; p__Planctomycetota; c__Planctomycetes; o__Pirellulales; f__Pirellulaceae; g__uncultured
ASV1649	13	0	14	6	0	0	0	0	d__Bacteria; p__Planctomycetota; c__Phycisphaerae; o__Tepidisphaerales; f__Tepidisphaeraceae; g__Tepidisphaera; s__uncultured bacterium
ASV1650	0	0	0	0	7	0	0	10	d__Bacteria; p__Chloroflexi; c__Anaerolineae; o__SBR1031; f__A4b; g__OLB13; s__uncultured bacterium
ASV1651	6	7	5	0	0	0	0	0	d__Bacteria; p__Chloroflexi; c__Ktedonobacteria; o__Ktedonobacterales; f__Ktedonobacteraceae; g__HSB OF53-F07
ASV1652	0	0	0	0	5	0	0	0	d__Bacteria; p__Chloroflexi; c__Chloroflexia; o__Thermomicrobiales; f__Thermomicrobiaceae; g__Nitrolancea; s__uncultured bacterium
ASV1653	0	0	0	0	0	0	0	18	d__Bacteria; p__Acidobacteriota; c__Acidobacteriae; o__Acidobacteriales
ASV1654	0	20	16	14	0	0	0	0	Unclassified
ASV1655	6	0	0	0	0	0	0	0	d__Bacteria; p__Gemmatimonadota; c__Gemmatimonadetes; o__Gemmatimonadales; f__Gemmatimonadaceae; g__Gemmatimonas
ASV1656	0	2	0	0	0	0	0	0	d__Bacteria; p__Chloroflexi; c__Anaerolineae; o__Caldilineales; f__Caldilineaceae; g__uncultured
ASV1657	15	0	0	0	0	0	0	0	d__Bacteria; p__Planctomycetota; c__Planctomycetes; o__Gemmatales; f__Gemmataceae; g__uncultured; s__uncultured bacterium
ASV1658	0	0	0	0	0	9	0	0	d__Bacteria; p__Firmicutes; c__Bacilli; o__Paenibacillales; f__Paenibacillaceae; g__Paenibacillus
ASV1659	0	0	0	0	0	7	0	0	d__Bacteria; p__Proteobacteria; c__Gammaproteobacteria; o__Competibacterales; f__Competibacteraceae; g__Candidatus Competibacter
ASV1660	0	0	0	0	14	0	21	15	d__Bacteria; p__Proteobacteria; c__Alphaproteobacteria; o__Rhizobiales; f__Rhizobiales Incertae Sedis; g__Bauldia; s__uncultured bacterium
ASV1661	0	0	0	0	16	0	0	0	d__Bacteria; p__Acidobacteriota; c__Blastocatellia; o__Pyrinomonadales; f__Pyrinomonadaceae; g__RB41; s__uncultured bacterium
ASV1662	0	0	0	0	0	22	16	29	d__Bacteria; p__Planctomycetota; c__Planctomycetes; o__Pirellulales; f__Pirellulaceae; g__Pirellula
ASV1663	0	0	0	0	16	5	12	0	d__Bacteria; p__Verrucomicrobiota; c__Verrucomicrobiae; o__Chthoniobacterales; f__Chthoniobacteraceae; g__Chthoniobacter; s__uncultured Verrucomicrobia bacterium
ASV1664	24	8	10	7	0	0	0	0	d__Bacteria; p__Acidobacteriota; c__Acidobacteriae; o__Acidobacteriales
ASV1665	0	29	0	0	0	0	0	0	d__Bacteria; p__Bacteroidota; c__Bacteroidia; o__Sphingobacteriales; f__Sphingobacteriaceae; g__Mucilaginibacter; s__uncultured Mucilaginibacter sp.
ASV1666	0	0	0	0	0	34	18	0	d__Bacteria; p__Chloroflexi; c__Anaerolineae; o__Caldilineales; f__Caldilineaceae; g__uncultured; s__uncultured bacterium
ASV1667	10	0	18	0	0	0	0	0	d__Bacteria; p__Cyanobacteria; c__Cyanobacteriia; o__Cyanobacteriales
ASV1668	0	0	0	11	0	0	0	0	d__Bacteria; p__Patescibacteria; c__Saccharimonadia; o__Saccharimonadales; f__Saccharimonadaceae; g__Candidatus Saccharimonas
ASV1669	37	0	11	27	0	0	0	0	d__Bacteria; p__Firmicutes; c__Dethiobacteria; o__Dethiobacterales; f__Dethiobacteraceae; g__uncultured
ASV1670	0	2	0	0	0	0	0	0	d__Bacteria
ASV1671	0	0	0	0	0	0	0	16	d__Bacteria; p__Acidobacteriota
ASV1672	16	0	0	0	0	0	0	0	d__Bacteria; p__Bacteroidota; c__Bacteroidia; o__Chitinophagales; f__Chitinophagaceae; g__Niastella
ASV1673	0	0	37	0	0	0	0	0	d__Bacteria; p__Proteobacteria; c__Alphaproteobacteria; o__Rhizobiales; f__Xanthobacteraceae; g__Afipia
ASV1674	0	0	0	0	17	9	0	7	d__Bacteria; p__Chloroflexi; c__Anaerolineae; o__Anaerolineales; f__Anaerolineaceae; g__uncultured; s__uncultured bacterium
ASV1675	0	0	0	0	0	12	13	18	d__Bacteria; p__Proteobacteria; c__Gammaproteobacteria; o__Pseudomonadales; f__Halomonadaceae; g__Kushneria
ASV1676	0	0	0	0	0	4	0	0	d__Bacteria; p__Proteobacteria; c__Gammaproteobacteria; o__Gammaproteobacteria Incertae Sedis; f__Unknown Family; g__Candidatus Berkiella; s__uncultured organism
ASV1677	0	0	0	0	19	3	0	0	d__Bacteria; p__Gemmatimonadota; c__Gemmatimonadetes; o__Gemmatimonadales; f__Gemmatimonadaceae; g__Gemmatimonas; s__uncultured bacterium
ASV1678	0	0	0	0	16	8	3	11	d__Bacteria; p__Planctomycetota; c__Planctomycetes; o__Planctomycetales; f__Gimesiaceae; g__uncultured; s__uncultured Planctomyces sp.
ASV1679	0	0	0	0	8	18	0	14	d__Bacteria; p__Cyanobacteria; c__Cyanobacteriia; o__Cyanobacteriales; f__Nostocaceae; g__Nostoc PCC-7107
ASV1680	0	0	0	0	5	4	0	0	d__Bacteria; p__Gemmatimonadota; c__Gemmatimonadetes; o__Gemmatimonadales; f__Gemmatimonadaceae; g__uncultured; s__uncultured bacterium
ASV1681	0	0	20	14	0	0	0	0	Unclassified
ASV1682	0	0	0	0	0	0	50	0	d__Bacteria; p__Proteobacteria; c__Alphaproteobacteria; o__Sphingomonadales; f__Sphingomonadaceae; g__Ellin6055
ASV1683	0	13	0	15	0	0	0	0	d__Bacteria; p__Proteobacteria; c__Alphaproteobacteria; o__Azospirillales; f__Azospirillaceae; g__Skermanella
ASV1684	42	0	18	0	0	0	0	0	d__Bacteria; p__Chloroflexi; c__Ktedonobacteria; o__Ktedonobacterales; f__Ktedonobacteraceae; g__BacC-u-018; s__uncultured bacterium
ASV1685	0	0	0	0	14	13	0	0	d__Bacteria; p__Acidobacteriota; c__Thermoanaerobaculia; o__Thermoanaerobaculales; f__Thermoanaerobaculaceae; g__Subgroup 23; s__uncultured organism
ASV1686	43	17	12	13	0	0	0	0	d__Bacteria; p__Acidobacteriota; c__Acidobacteriae; o__Acidobacteriales; f__Acidobacteriaceae (Subgroup 1); g__uncultured; s__uncultured bacterium
ASV1687	0	0	26	0	0	0	0	0	d__Bacteria; p__Actinobacteriota; c__Actinobacteria; o__Frankiales; f__Geodermatophilaceae; g__Geodermatophilus
ASV1688	0	0	0	0	0	0	0	74	d__Bacteria
ASV1689	0	0	0	0	0	7	0	0	d__Bacteria; p__Chloroflexi; c__Anaerolineae; o__SBR1031; f__A4b; g__OLB13; s__uncultured bacterium
ASV1690	14	0	0	0	0	0	0	0	d__Bacteria; p__Acidobacteriota; c__Acidobacteriae; o__Acidobacteriales; f__Acidobacteriaceae (Subgroup 1); g__uncultured; s__uncultured bacterium
ASV1691	37	0	0	0	0	0	0	0	Unclassified
ASV1692	0	0	0	0	12	29	0	31	d__Bacteria; p__Bacteroidota; c__Bacteroidia; o__Cytophagales; f__Microscillaceae; g__uncultured; s__uncultured soil bacterium
ASV1693	0	0	0	0	8	4	11	18	d__Bacteria; p__Methylomirabilota; c__Methylomirabilia; o__Methylomirabilales; f__Methylomirabilaceae; g__MIZ17; s__uncultured bacterium
ASV1694	27	33	0	0	0	0	0	0	d__Bacteria; p__Proteobacteria; c__Gammaproteobacteria; o__Burkholderiales; f__Burkholderiaceae; g__Burkholderia-Caballeronia-Paraburkholderia; s__Burkholderia sp. RPE67
ASV1695	0	0	0	0	17	4	0	0	d__Bacteria; p__Acidobacteriota; c__Vicinamibacteria; o__Vicinamibacterales; f__Vicinamibacteraceae; g__Luteitalea; s__uncultured bacterium
ASV1696	0	0	0	104	0	0	0	0	d__Bacteria
ASV1697	0	0	0	0	0	0	0	12	d__Bacteria
ASV1698	17	0	0	25	0	0	0	0	d__Bacteria; p__Firmicutes; c__Bacilli; o__Bacillales; f__Bacillaceae; g__Bacillus; s__uncultured compost bacterium
ASV1699	0	0	0	0	20	11	0	0	d__Bacteria; p__Gemmatimonadota; c__Gemmatimonadetes; o__Gemmatimonadales; f__Gemmatimonadaceae; g__uncultured; s__uncultured bacterium
ASV1700	11	0	11	0	0	0	0	0	d__Bacteria; p__Planctomycetota; c__Phycisphaerae; o__Tepidisphaerales; f__Tepidisphaeraceae; g__Tepidisphaera; s__uncultured bacterium
ASV1701	0	0	0	0	0	0	0	45	d__Bacteria; p__Bacteroidota; c__Bacteroidia; o__Chitinophagales; f__Chitinophagaceae; g__Terrimonas
ASV1702	0	0	0	0	0	15	0	13	d__Bacteria; p__Actinobacteriota; c__Thermoleophilia; o__Gaiellales; f__Gaiellaceae; g__Gaiella; s__uncultured bacterium
ASV1703	0	0	0	0	12	0	27	0	d__Bacteria; p__Desulfobacterota; c__Desulfuromonadia; o__Desulfuromonadales; f__Syntrophotaleaceae; g__Syntrophotalea
ASV1704	0	0	0	0	0	21	0	20	d__Bacteria; p__Acidobacteriota; c__Vicinamibacteria; o__Vicinamibacterales; f__Vicinamibacteraceae; g__Luteitalea
ASV1705	3	6	7	48	0	0	0	0	d__Bacteria; p__Chloroflexi; c__Chloroflexia; o__Chloroflexales; f__Roseiflexaceae; g__uncultured; s__uncultured Chloroflexi bacterium
ASV1706	0	0	0	0	16	10	7	0	d__Bacteria; p__Acidobacteriota
ASV1707	0	0	5	3	0	0	0	0	Unclassified
ASV1708	0	0	0	0	0	0	17	0	d__Bacteria
ASV1709	0	16	0	0	0	0	0	0	d__Bacteria; p__Acidobacteriota
ASV1710	15	25	8	8	0	0	0	0	d__Bacteria; p__Gemmatimonadota; c__Gemmatimonadetes; o__Gemmatimonadales; f__Gemmatimonadaceae; g__uncultured; s__uncultured bacterium
ASV1711	8	0	9	14	0	0	0	0	d__Bacteria; p__Firmicutes; c__Bacilli; o__Bacillales; f__Bacillaceae; g__Calditerricola
ASV1712	0	0	0	0	0	0	35	23	d__Bacteria; p__Actinobacteriota; c__Actinobacteria; o__Pseudonocardiales; f__Pseudonocardiaceae; g__Lechevalieria
ASV1713	0	0	0	0	0	0	11	6	d__Bacteria; p__Bacteroidota; c__Bacteroidia; o__Chitinophagales; f__Saprospiraceae; g__uncultured; s__uncultured bacterium
ASV1714	0	14	13	0	0	0	0	0	Unclassified
ASV1715	0	0	0	8	0	0	0	0	d__Bacteria; p__Actinobacteriota; c__Acidimicrobiia; o__Acidimicrobiales; f__Acidimicrobiaceae; g__uncultured; s__uncultured bacterium
ASV1716	16	4	52	7	0	0	0	0	d__Bacteria; p__Proteobacteria; c__Alphaproteobacteria; o__Defluviicoccales; f__Defluviicoccaceae; g__Defluviicoccus; s__uncultured bacterium
ASV1717	0	0	44	0	0	0	0	0	d__Bacteria; p__Planctomycetota; c__Planctomycetes; o__Gemmatales; f__Gemmataceae; g__uncultured; s__uncultured planctomycete
ASV1718	0	0	0	0	0	12	0	0	d__Bacteria; p__Proteobacteria; c__Gammaproteobacteria; o__Xanthomonadales; f__Xanthomonadaceae; g__Lysobacter
ASV1719	0	0	0	0	0	12	38	0	d__Bacteria; p__Entotheonellaeota; c__Entotheonellia; o__Entotheonellales; f__Entotheonellaceae; g__Candidatus Entotheonella; s__uncultured bacterium
ASV1720	14	4	8	12	0	0	0	0	d__Bacteria; p__Planctomycetota; c__Planctomycetes; o__Gemmatales; f__Gemmataceae; g__uncultured; s__uncultured bacterium
ASV1721	0	0	25	0	0	0	0	0	d__Bacteria; p__Proteobacteria; c__Alphaproteobacteria; o__Azospirillales; f__Azospirillaceae; g__Skermanella; s__uncultured bacterium
ASV1722	3	0	0	0	0	0	0	0	d__Bacteria; p__Actinobacteriota; c__Actinobacteria; o__Corynebacteriales; f__Nocardiaceae; g__Nocardia; s__Nocardia nova
ASV1723	0	8	3	14	0	0	0	0	d__Bacteria; p__Firmicutes; c__Bacilli; o__Bacillales; f__Bacillaceae; g__Bacillus; s__Bacillus chungangensis
ASV1724	0	0	0	0	0	0	18	0	d__Bacteria; p__Acidobacteriota; c__Acidobacteriae; o__Acidobacteriales; f__Koribacteraceae; g__Candidatus Koribacter; s__uncultured bacterium
ASV1725	0	0	0	0	0	0	0	40	d__Bacteria; p__Proteobacteria; c__Alphaproteobacteria; o__Sphingomonadales; f__Sphingomonadaceae; g__Sphingomonas; s__uncultured bacterium
ASV1726	0	0	0	0	16	25	37	0	d__Bacteria; p__Planctomycetota; c__Planctomycetes; o__Pirellulales; f__Pirellulaceae; g__Pir4 lineage
ASV1727	0	0	0	0	16	0	11	0	d__Bacteria; p__Firmicutes; c__Bacilli; o__Thermoactinomycetales; f__Thermoactinomycetaceae; g__Planifilum
ASV1728	0	0	0	0	0	0	12	0	d__Bacteria; p__Actinobacteriota; c__Acidimicrobiia; o__Microtrichales
ASV1729	0	0	0	0	0	0	7	18	d__Bacteria; p__Gemmatimonadota; c__Gemmatimonadetes; o__Gemmatimonadales; f__Gemmatimonadaceae; g__uncultured; s__uncultured bacterium
ASV1730	13	11	0	0	0	0	0	0	d__Bacteria; p__Gemmatimonadota; c__Gemmatimonadetes; o__Gemmatimonadales; f__Gemmatimonadaceae; g__Gemmatimonas
ASV1731	12	6	20	10	0	0	0	0	d__Bacteria; p__Planctomycetota; c__Phycisphaerae; o__Tepidisphaerales; f__Tepidisphaeraceae; g__Tepidisphaera; s__uncultured bacterium
ASV1732	8	0	36	0	0	0	0	0	d__Bacteria; p__Actinobacteriota; c__Actinobacteria; o__Frankiales; f__Frankiaceae; g__Jatrophihabitans
ASV1733	5	0	0	16	0	0	0	0	Unclassified
ASV1734	0	0	0	0	0	26	0	0	d__Bacteria; p__Acidobacteriota; c__Thermoanaerobaculia; o__Thermoanaerobaculales; f__Thermoanaerobaculaceae; g__Subgroup 10; s__uncultured Acidobacteria bacterium
ASV1735	0	0	0	0	25	0	0	0	d__Bacteria; p__Actinobacteriota; c__Actinobacteria
ASV1736	36	0	9	0	0	0	0	0	Unclassified
ASV1737	0	0	0	0	10	7	7	27	d__Bacteria; p__Chloroflexi; c__Anaerolineae; o__Anaerolineales; f__Anaerolineaceae; g__uncultured; s__uncultured bacterium
ASV1738	0	0	12	0	0	0	0	0	d__Bacteria; p__Chloroflexi; c__Anaerolineae; o__Anaerolineales; f__Anaerolineaceae; g__uncultured
ASV1739	0	0	0	0	33	0	0	0	Unclassified
ASV1740	0	0	0	0	16	0	0	0	d__Bacteria; p__Elusimicrobiota; c__Endomicrobia; o__Endomicrobiales; f__Endomicrobiaceae; g__Endomicrobium
ASV1741	0	0	0	0	23	6	13	26	d__Bacteria; p__Chloroflexi; c__Anaerolineae; o__Anaerolineales; f__Anaerolineaceae
ASV1742	0	0	0	0	0	30	0	17	d__Bacteria; p__Chloroflexi; c__Anaerolineae; o__Anaerolineales; f__Anaerolineaceae; g__Thermomarinilinea
ASV1743	15	5	11	10	0	0	0	0	d__Bacteria; p__Firmicutes
ASV1744	0	0	0	0	0	3	0	0	d__Bacteria; p__Planctomycetota; c__Planctomycetes; o__Planctomycetales; f__Gimesiaceae; g__uncultured; s__uncultured bacterium
ASV1745	0	0	0	0	0	16	20	0	d__Bacteria; p__Bacteroidota; c__Bacteroidia; o__Chitinophagales; f__Chitinophagaceae; g__uncultured; s__uncultured bacterium
ASV1746	24	0	49	0	0	0	0	0	d__Bacteria; p__Planctomycetota; c__Planctomycetes; o__Isosphaerales; f__Isosphaeraceae; g__uncultured
ASV1747	0	0	0	0	0	8	0	0	d__Bacteria; p__Chloroflexi; c__Anaerolineae; o__Anaerolineales; f__Anaerolineaceae; g__uncultured
ASV1748	0	0	0	0	0	0	32	0	d__Bacteria; p__Acidobacteriota; c__Blastocatellia; o__Pyrinomonadales; f__Pyrinomonadaceae; g__RB41; s__uncultured bacterium
ASV1749	0	0	0	0	0	0	8	0	d__Bacteria; p__Myxococcota; c__Polyangia; o__Haliangiales; f__Haliangiaceae; g__Haliangium; s__uncultured bacterium
ASV1750	33	0	0	0	0	0	0	0	d__Bacteria; p__Acidobacteriota; c__Acidobacteriae; o__Acidobacteriales; f__Acidobacteriaceae (Subgroup 1); g__uncultured; s__uncultured bacterium
ASV1751	0	11	0	0	0	0	0	0	d__Bacteria; p__Actinobacteriota; c__Actinobacteria; o__Pseudonocardiales; f__Pseudonocardiaceae; g__Kutzneria
ASV1752	0	0	0	0	19	0	0	30	d__Bacteria; p__Proteobacteria; c__Gammaproteobacteria; o__Burkholderiales; f__Comamonadaceae; g__Ramlibacter
ASV1753	0	0	0	0	0	0	14	21	d__Bacteria; p__Firmicutes; c__Bacilli; o__Thermoactinomycetales; f__Thermoactinomycetaceae; g__Hazenella
ASV1754	0	0	0	0	6	0	0	0	d__Bacteria; p__Actinobacteriota; c__Actinobacteria; o__Propionibacteriales; f__Nocardioidaceae; g__Nocardioides; s__uncultured bacterium
ASV1755	0	0	2	0	0	0	0	0	d__Bacteria; p__Firmicutes; c__Negativicutes; o__Veillonellales-Selenomonadales
ASV1756	14	18	0	6	0	0	0	0	d__Bacteria
ASV1757	0	0	3	0	0	0	0	0	d__Bacteria; p__Firmicutes; c__Clostridia; o__Oscillospirales; f__Hungateiclostridiaceae; g__Ruminiclostridium; s__uncultured bacterium
ASV1758	29	27	0	0	0	0	0	0	d__Bacteria; p__Firmicutes; c__Dethiobacteria; o__Dethiobacterales; f__Dethiobacteraceae
ASV1759	0	0	0	0	23	0	0	0	d__Bacteria; p__Verrucomicrobiota; c__Verrucomicrobiae; o__Chthoniobacterales; f__Chthoniobacteraceae; g__Candidatus Udaeobacter; s__uncultured bacterium
ASV1760	0	0	0	0	18	0	17	26	d__Bacteria; p__Gemmatimonadota; c__Gemmatimonadetes; o__Gemmatimonadales; f__Gemmatimonadaceae; g__Gemmatimonas; s__uncultured bacterium
ASV1761	16	0	0	0	0	0	0	0	d__Bacteria; p__Chloroflexi; c__Ktedonobacteria; o__Ktedonobacterales; f__Ktedonobacteraceae; g__1921-2
ASV1762	0	0	0	0	0	9	2	0	d__Bacteria; p__Gemmatimonadota; c__Gemmatimonadetes; o__Gemmatimonadales; f__Gemmatimonadaceae; g__uncultured; s__uncultured bacterium
ASV1763	0	22	0	0	0	0	0	0	Unclassified
ASV1764	0	0	0	0	0	0	22	12	d__Bacteria; p__Verrucomicrobiota; c__Verrucomicrobiae; o__Pedosphaerales; f__Pedosphaeraceae; g__DEV008; s__uncultured bacterium
ASV1765	0	0	0	0	0	25	0	15	Unclassified
ASV1766	0	0	0	0	0	0	0	2	d__Bacteria; p__Actinobacteriota; c__Rubrobacteria; o__Rubrobacterales; f__Rubrobacteriaceae; g__Rubrobacter
ASV1767	0	32	0	29	0	0	0	0	d__Bacteria
ASV1768	0	0	0	0	0	3	4	0	d__Bacteria; p__Proteobacteria; c__Gammaproteobacteria; o__Diplorickettsiales; f__Diplorickettsiaceae; g__uncultured
ASV1769	0	0	0	0	0	0	0	12	d__Bacteria; p__Chloroflexi; c__Anaerolineae; o__Anaerolineales; f__Anaerolineaceae; g__uncultured
ASV1770	0	0	0	0	0	0	0	92	d__Bacteria; p__Acidobacteriota; c__Vicinamibacteria; o__Vicinamibacterales; f__Vicinamibacteraceae; g__Luteitalea; s__uncultured bacterium
ASV1771	0	0	0	0	0	17	0	0	d__Bacteria; p__Proteobacteria; c__Gammaproteobacteria; o__Xanthomonadales; f__Rhodanobacteraceae; g__Rhodanobacter
ASV1772	3	8	6	18	0	0	0	0	d__Bacteria; p__Chloroflexi; c__Ktedonobacteria; o__Ktedonobacterales; f__Ktedonobacteraceae; g__1921-2
ASV1773	19	0	10	10	0	0	0	0	d__Bacteria; p__Myxococcota; c__Myxococcia; o__Myxococcales; f__Myxococcaceae; g__P3OB-42
ASV1774	0	0	32	0	0	0	0	0	d__Bacteria; p__Actinobacteriota; c__Actinobacteria; o__Micromonosporales; f__Micromonosporaceae; g__Dactylosporangium; s__Dactylosporangium salmoneum
ASV1775	0	0	13	13	0	0	0	0	d__Bacteria; p__Planctomycetota; c__Phycisphaerae; o__Tepidisphaerales; f__Tepidisphaeraceae; g__Tepidisphaera; s__uncultured bacterium
ASV1776	0	0	0	0	0	0	42	0	d__Bacteria; p__Proteobacteria; c__Gammaproteobacteria; o__Burkholderiales; f__Rhodocyclaceae; g__uncultured; s__uncultured bacterium
ASV1777	5	0	0	0	0	0	0	0	d__Bacteria; p__Firmicutes; c__Desulfotomaculia; o__Ammonifexales; f__Ammonificaceae; g__Thermodesulfitimonas; s__uncultured bacterium
ASV1778	0	0	0	0	16	21	0	17	d__Bacteria; p__Chloroflexi; c__Anaerolineae; o__SBR1031; f__A4b; g__OLB13; s__uncultured bacterium
ASV1779	13	15	0	18	0	0	0	0	d__Bacteria; p__Acidobacteriota; c__Acidobacteriae; o__Acidobacteriales; f__Acidobacteriaceae (Subgroup 1); g__uncultured
ASV1780	0	18	11	21	0	0	0	0	d__Bacteria; p__Acidobacteriota; c__Acidobacteriae; o__Acidobacteriales; f__Koribacteraceae; g__Candidatus Koribacter
ASV1781	0	0	0	0	0	6	0	0	d__Bacteria; p__Gemmatimonadota; c__Longimicrobia; o__Longimicrobiales; f__Longimicrobiaceae; g__YC-ZSS-LKJ147
ASV1782	5	0	6	7	0	0	0	0	d__Bacteria; p__Chloroflexi; c__Ktedonobacteria; o__Ktedonobacterales; f__Ktedonobacteraceae; g__HSB OF53-F07; s__uncultured Ktedonobacter sp.
ASV1783	0	0	0	0	0	0	25	0	d__Bacteria; p__Proteobacteria; c__Gammaproteobacteria; o__Steroidobacterales; f__Steroidobacteraceae; g__uncultured
ASV1784	15	0	0	12	0	0	0	0	d__Bacteria; p__Chloroflexi; c__Anaerolineae; o__Anaerolineales; f__Anaerolineaceae; g__uncultured
ASV1785	0	0	0	0	16	18	0	0	d__Bacteria; p__Planctomycetota; c__Phycisphaerae; o__Tepidisphaerales; f__Tepidisphaeraceae; g__Tepidisphaera; s__uncultured bacterium
ASV1786	0	0	0	0	0	0	7	0	d__Bacteria; p__Actinobacteriota; c__Thermoleophilia; o__Solirubrobacterales; f__Solirubrobacteraceae; g__Conexibacter; s__uncultured bacterium
ASV1787	0	0	0	0	0	0	0	6	d__Bacteria; p__Acidobacteriota; c__Acidobacteriae; o__Acidobacteriales; f__Acidobacteriaceae (Subgroup 1); g__Edaphobacter; s__uncultured bacterium
ASV1788	0	0	0	0	0	0	18	0	d__Bacteria; p__Myxococcota; c__Myxococcia; o__Myxococcales; f__Anaeromyxobacteraceae; g__Anaeromyxobacter; s__uncultured bacterium
ASV1789	0	0	0	15	0	0	0	0	d__Bacteria; p__Chloroflexi; c__Ktedonobacteria; o__Ktedonobacterales; f__Ktedonobacteraceae; g__Ktedonobacter; s__bacterium SOSP1-52
ASV1790	0	0	0	0	0	54	0	0	d__Bacteria; p__Actinobacteriota; c__Thermoleophilia; o__Solirubrobacterales; f__Solirubrobacteraceae; g__Solirubrobacter; s__uncultured bacterium
ASV1791	0	0	0	0	7	8	5	0	d__Bacteria; p__Chloroflexi; c__Ktedonobacteria; o__Ktedonobacterales; f__Ktedonobacteraceae; g__HSB OF53-F07
ASV1792	0	0	0	0	0	0	0	32	d__Bacteria; p__Proteobacteria; c__Gammaproteobacteria; o__Xanthomonadales; f__Rhodanobacteraceae; g__Rhodanobacter
ASV1793	18	0	0	0	0	0	0	0	Unclassified
ASV1794	0	0	0	34	0	0	0	0	d__Bacteria; p__Chloroflexi; c__Chloroflexia; o__Thermobaculales; f__Thermobaculaceae; g__Thermobaculum; s__uncultured bacterium
ASV1795	0	0	0	0	25	0	0	0	d__Bacteria; p__Acidobacteriota; c__Vicinamibacteria; o__Vicinamibacterales; f__Vicinamibacteraceae; g__uncultured; s__uncultured bacterium
ASV1796	0	0	0	0	12	7	9	20	Unclassified
ASV1797	0	0	0	0	0	37	0	0	d__Bacteria; p__Proteobacteria; c__Gammaproteobacteria; o__Coxiellales; f__Coxiellaceae; g__Coxiella; s__uncultured bacterium
ASV1798	0	0	0	0	5	16	0	0	d__Bacteria; p__Gemmatimonadota; c__Gemmatimonadetes; o__Gemmatimonadales; f__Gemmatimonadaceae; g__Gemmatimonas
ASV1799	19	8	9	0	0	0	0	0	d__Bacteria; p__Chloroflexi; c__Ktedonobacteria; o__Ktedonobacterales; f__Ktedonobacteraceae; g__1959-1; s__uncultured bacterium
ASV1800	0	0	0	0	0	18	0	0	d__Bacteria; p__Gemmatimonadota; c__Gemmatimonadetes; o__Gemmatimonadales; f__Gemmatimonadaceae; g__Gemmatimonas; s__uncultured bacterium
ASV1801	0	0	0	0	5	0	0	0	d__Bacteria; p__Proteobacteria; c__Gammaproteobacteria; o__Burkholderiales; f__Methylophilaceae; g__uncultured
ASV1802	0	0	15	0	0	0	0	0	d__Bacteria; p__Chloroflexi; c__Ktedonobacteria; o__Ktedonobacterales; f__Ktedonobacteraceae; g__HSB OF53-F07; s__uncultured Ktedonobacter sp.
ASV1803	0	0	0	0	10	8	0	27	d__Bacteria; p__Proteobacteria
ASV1804	0	0	0	0	14	0	0	8	d__Bacteria; p__Verrucomicrobiota; c__Verrucomicrobiae; o__Pedosphaerales; f__Pedosphaeraceae
ASV1805	0	0	0	0	19	16	13	7	d__Bacteria; p__Gemmatimonadota; c__Gemmatimonadetes; o__Gemmatimonadales; f__Gemmatimonadaceae; g__uncultured; s__uncultured bacterium
ASV1806	0	0	0	0	0	7	0	0	Unclassified
ASV1807	0	0	0	0	11	16	9	0	d__Bacteria; p__Actinobacteriota; c__Thermoleophilia; o__Solirubrobacterales; f__Solirubrobacteraceae; g__Conexibacter
ASV1808	0	0	0	0	10	0	0	7	d__Bacteria; p__Acidobacteriota
ASV1809	0	19	0	0	0	0	0	0	d__Bacteria; p__Proteobacteria; c__Alphaproteobacteria; o__Acetobacterales; f__Acetobacteraceae; g__uncultured; s__uncultured bacterium
ASV1810	0	0	0	0	0	10	0	0	d__Bacteria; p__Proteobacteria; c__Gammaproteobacteria; o__Xanthomonadales; f__Xanthomonadaceae; g__Thermomonas; s__uncultured bacterium
ASV1811	0	0	0	0	22	12	0	26	d__Bacteria; p__Gemmatimonadota; c__Gemmatimonadetes; o__Gemmatimonadales; f__Gemmatimonadaceae; g__Gemmatimonas; s__uncultured bacterium
ASV1812	0	0	18	0	0	0	0	0	d__Bacteria; p__Cyanobacteria; c__Vampirivibrionia; o__Vampirovibrionales; f__Vampirovibrionaceae; g__Vampirovibrio
ASV1813	13	0	0	0	0	0	0	0	d__Bacteria; p__Desulfobacterota; c__Desulfuromonadia; o__Geobacterales; f__Geobacteraceae; g__uncultured; s__uncultured bacterium
ASV1814	0	0	0	0	14	14	0	0	d__Bacteria; p__Gemmatimonadota; c__Longimicrobia; o__Longimicrobiales; f__Longimicrobiaceae; g__Longimicrobium
ASV1815	0	0	0	0	14	0	0	13	d__Bacteria; p__Acidobacteriota; c__Vicinamibacteria; o__Vicinamibacterales; f__Vicinamibacteraceae; g__Vicinamibacter
ASV1816	0	0	0	0	0	0	0	29	d__Bacteria; p__Gemmatimonadota; c__Gemmatimonadetes; o__Gemmatimonadales; f__Gemmatimonadaceae; g__uncultured; s__uncultured bacterium
ASV1817	0	0	0	0	45	0	0	0	d__Bacteria; p__Acidobacteriota; c__Blastocatellia; o__Pyrinomonadales; f__Pyrinomonadaceae; g__RB41; s__uncultured bacterium
ASV1818	0	0	0	0	0	20	30	17	d__Bacteria; p__Myxococcota; c__Polyangia; o__Polyangiales; f__Phaselicystidaceae; g__Phaselicystis
ASV1819	0	0	0	0	4	0	10	0	d__Bacteria; p__Chloroflexi; c__Anaerolineae; o__Caldilineales; f__Caldilineaceae; g__Litorilinea; s__uncultured soil bacterium
ASV1820	6	0	4	3	0	0	0	0	d__Bacteria; p__Chloroflexi; c__Ktedonobacteria; o__Ktedonobacterales; f__Ktedonobacteraceae; g__HSB OF53-F07; s__uncultured Ktedonobacter sp.
ASV1821	0	0	0	0	0	15	0	12	d__Bacteria; p__Chloroflexi; c__Anaerolineae; o__SBR1031; f__A4b; g__OLB13; s__uncultured bacterium
ASV1822	0	0	0	0	15	0	0	0	d__Bacteria; p__Acidobacteriota; c__Thermoanaerobaculia; o__Thermoanaerobaculales; f__Thermoanaerobaculaceae; g__Subgroup 10; s__uncultured bacterium
ASV1823	48	0	0	0	0	0	0	0	d__Bacteria; p__Actinobacteriota; c__Actinobacteria; o__Streptomycetales; f__Streptomycetaceae; g__Kitasatospora
ASV1824	0	0	9	0	0	0	0	0	d__Bacteria; p__Proteobacteria; c__Alphaproteobacteria; o__Rhizobiales; f__Hyphomicrobiaceae; g__Hyphomicrobium
ASV1825	0	0	0	0	27	0	0	0	d__Bacteria; p__Acidobacteriota; c__Blastocatellia; o__Pyrinomonadales; f__Pyrinomonadaceae; g__RB41; s__uncultured bacterium
ASV1826	0	34	0	0	0	0	0	0	d__Bacteria; p__Proteobacteria; c__Alphaproteobacteria; o__Azospirillales; f__Azospirillaceae; g__Azospirillum
ASV1827	0	12	0	0	0	0	0	0	d__Bacteria; p__Actinobacteriota; c__Thermoleophilia; o__Solirubrobacterales; f__Solirubrobacteraceae; g__Conexibacter
ASV1828	8	8	0	12	0	0	0	0	d__Bacteria; p__Planctomycetota; c__Phycisphaerae; o__Tepidisphaerales; f__Tepidisphaeraceae; g__Tepidisphaera; s__uncultured bacterium
ASV1829	24	0	0	0	0	0	0	0	d__Bacteria; p__Gemmatimonadota; c__Gemmatimonadetes; o__Gemmatimonadales; f__Gemmatimonadaceae; g__uncultured; s__uncultured bacterium
ASV1830	0	0	0	0	0	0	13	30	d__Bacteria; p__Proteobacteria; c__Gammaproteobacteria; o__Burkholderiales; f__Nitrosomonadaceae; g__MND1; s__uncultured bacterium
ASV1831	0	0	0	0	0	0	7	8	d__Bacteria; p__Proteobacteria; c__Alphaproteobacteria; o__Azospirillales; f__Azospirillaceae; g__Azospirillum
ASV1832	0	0	0	0	0	3	0	0	d__Bacteria; p__Chloroflexi; c__Anaerolineae; o__Ardenticatenales; f__Ardenticatenaceae; g__uncultured; s__uncultured bacterium
ASV1833	6	10	5	0	0	0	0	0	d__Bacteria; p__Chloroflexi; c__Ktedonobacteria; o__Ktedonobacterales; f__Ktedonobacteraceae; g__G12-WMSP1; s__uncultured bacterium
ASV1834	25	0	0	0	0	0	0	0	d__Bacteria; p__Planctomycetota; c__Planctomycetes; o__Gemmatales; f__Gemmataceae; g__uncultured; s__uncultured planctomycete
ASV1835	0	3	0	0	0	0	0	0	d__Bacteria; p__Bdellovibrionota; c__Bdellovibrionia; o__Bacteriovoracales; f__Bacteriovoracaceae; g__Peredibacter
ASV1836	0	0	0	0	0	0	4	0	d__Bacteria; p__Proteobacteria; c__Alphaproteobacteria; o__Holosporales; f__Holosporaceae; g__uncultured; s__uncultured bacterium
ASV1837	16	0	0	0	0	0	0	0	d__Bacteria; p__Synergistota; c__Synergistia; o__Synergistales; f__Synergistaceae
ASV1838	12	0	4	0	0	0	0	0	d__Bacteria; p__Chloroflexi; c__Ktedonobacteria; o__Ktedonobacterales; f__Ktedonobacteraceae
ASV1839	0	0	0	0	0	17	10	4	d__Bacteria; p__Chloroflexi; c__Chloroflexia; o__Chloroflexales; f__Roseiflexaceae; g__uncultured; s__uncultured bacterium
ASV1840	0	0	0	0	4	0	0	0	d__Bacteria; p__Chloroflexi; c__Chloroflexia; o__Thermomicrobiales; f__Thermomicrobiaceae
ASV1841	0	0	0	0	17	0	0	24	d__Bacteria; p__Proteobacteria; c__Gammaproteobacteria; o__Burkholderiales; f__Rhodocyclaceae; g__Sulfuritalea; s__uncultured bacterium
ASV1842	0	0	0	0	0	14	0	11	d__Bacteria; p__Chloroflexi; c__Chloroflexia; o__Chloroflexales; f__Roseiflexaceae; g__uncultured; s__uncultured bacterium
ASV1843	9	0	35	22	0	0	0	0	d__Bacteria; p__Patescibacteria; c__Saccharimonadia; o__Saccharimonadales; f__Saccharimonadaceae; g__Candidatus Saccharimonas
ASV1844	0	0	8	0	0	0	0	0	d__Bacteria; p__Chloroflexi; c__Ktedonobacteria; o__Ktedonobacterales; f__Ktedonobacteraceae; g__HSB OF53-F07; s__uncultured bacterium
ASV1845	0	0	0	0	0	17	9	18	d__Bacteria; p__Firmicutes; c__Clostridia; o__Oscillospirales; f__Butyricicoccaceae; g__UCG-009; s__uncultured bacterium
ASV1846	0	0	0	19	0	0	0	0	d__Bacteria; p__Chloroflexi; c__Ktedonobacteria; o__Ktedonobacterales; f__Ktedonobacteraceae; g__HSB OF53-F07; s__uncultured bacterium
ASV1847	0	0	51	0	0	0	0	0	d__Bacteria; p__Actinobacteriota; c__Acidimicrobiia; o__Microtrichales; f__Ilumatobacteraceae; g__uncultured; s__uncultured bacterium
ASV1848	0	0	0	0	39	0	0	0	d__Bacteria; p__Acidobacteriota; c__Acidobacteriae; o__Acidobacteriales; f__Koribacteraceae; g__Candidatus Koribacter; s__uncultured bacterium
ASV1849	0	0	0	0	35	0	0	29	d__Bacteria; p__Verrucomicrobiota; c__Verrucomicrobiae; o__Pedosphaerales; f__Pedosphaeraceae; g__Ellin516; s__uncultured bacterium
ASV1850	12	12	0	9	0	0	0	0	d__Bacteria; p__Armatimonadota; c__Chthonomonadetes; o__Chthonomonadales; f__Chthonomonadaceae; g__Chthonomonas; s__uncultured Armatimonadetes bacterium
ASV1851	0	0	0	0	25	10	0	0	d__Bacteria; p__Chloroflexi; c__Anaerolineae; o__Anaerolineales; f__Anaerolineaceae; g__uncultured; s__uncultured bacterium
ASV1852	0	17	13	8	0	0	0	0	d__Bacteria; p__Firmicutes; c__Bacilli; o__Bacillales; f__Bacillaceae; g__Bacillus
ASV1853	0	6	0	0	0	0	0	0	d__Bacteria; p__Actinobacteriota; c__Actinobacteria; o__Propionibacteriales; f__Nocardioidaceae; g__Nocardioides; s__uncultured bacterium
ASV1854	0	0	0	0	0	24	34	0	d__Bacteria; p__Proteobacteria; c__Alphaproteobacteria; o__Sphingomonadales; f__Sphingomonadaceae; g__Sphingomonas; s__uncultured bacterium
ASV1855	0	0	0	0	7	14	11	3	d__Bacteria; p__Chloroflexi; c__Chloroflexia; o__Chloroflexales; f__Roseiflexaceae; g__uncultured; s__uncultured bacterium
ASV1856	0	0	0	0	0	7	0	0	d__Bacteria; p__Patescibacteria; c__Saccharimonadia; o__Saccharimonadales; f__Saccharimonadaceae; g__TM7x
ASV1857	27	0	0	0	0	0	0	0	d__Bacteria; p__Acidobacteriota; c__Acidobacteriae; o__Acidobacteriales; f__Acidobacteriaceae (Subgroup 1); g__uncultured; s__uncultured bacterium
ASV1858	0	0	0	0	9	6	0	3	d__Bacteria; p__Chloroflexi; c__Anaerolineae; o__Anaerolineales; f__Anaerolineaceae; g__uncultured; s__uncultured bacterium
ASV1859	0	3	0	0	0	0	0	0	d__Bacteria; p__Gemmatimonadota; c__Gemmatimonadetes; o__Gemmatimonadales; f__Gemmatimonadaceae; g__uncultured; s__uncultured bacterium
ASV1860	0	0	0	0	33	0	0	0	d__Bacteria; p__Planctomycetota; c__Planctomycetes; o__Pirellulales; f__Pirellulaceae; g__uncultured
ASV1861	0	0	0	0	16	18	0	23	d__Bacteria; p__Acidobacteriota; c__Thermoanaerobaculia; o__Thermoanaerobaculales; f__Thermoanaerobaculaceae; g__Subgroup 10
ASV1862	30	0	22	0	0	0	0	0	d__Bacteria; p__Firmicutes; c__Bacilli; o__Caldalkalibacillales; f__Caldalkalibacillaceae; g__Caldalkalibacillus
ASV1863	0	0	0	0	0	0	0	13	d__Bacteria; p__Chloroflexi; c__Anaerolineae; o__Anaerolineales; f__Anaerolineaceae; g__uncultured
ASV1864	7	0	0	10	0	0	0	0	d__Bacteria; p__Chloroflexi; c__Ktedonobacteria; o__Ktedonobacterales; f__Ktedonobacteraceae; g__HSB OF53-F07
ASV1865	0	0	0	0	0	0	8	8	d__Bacteria; p__Chloroflexi; c__Chloroflexia; o__Chloroflexales; f__Roseiflexaceae; g__uncultured; s__uncultured bacterium
ASV1866	0	0	0	0	0	0	0	23	d__Bacteria; p__Verrucomicrobiota; c__Verrucomicrobiae; o__Pedosphaerales; f__Pedosphaeraceae; g__ADurb.Bin063-1; s__uncultured Verrucomicrobia bacterium
ASV1867	0	0	0	0	0	5	27	6	d__Bacteria; p__Proteobacteria; c__Gammaproteobacteria; o__Chromatiales; f__Chromatiaceae; g__Thiocapsa
ASV1868	0	0	0	0	13	9	11	28	d__Bacteria; p__Verrucomicrobiota; c__Verrucomicrobiae; o__Pedosphaerales; f__Pedosphaeraceae; g__Pedosphaera; s__uncultured bacterium
ASV1869	17	0	32	12	0	0	0	0	d__Bacteria; p__Actinobacteriota; c__Thermoleophilia; o__Gaiellales; f__Gaiellaceae; g__Gaiella; s__uncultured bacterium
ASV1870	20	2	7	7	0	0	0	0	d__Bacteria; p__Myxococcota; c__Myxococcia; o__Myxococcales; f__Myxococcaceae; g__P3OB-42; s__uncultured bacterium
ASV1871	0	0	0	0	5	7	0	0	d__Bacteria; p__Chloroflexi; c__Anaerolineae; o__Caldilineales; f__Caldilineaceae; g__uncultured; s__uncultured bacterium
ASV1872	0	0	0	0	30	0	0	0	d__Bacteria; p__Firmicutes
ASV1873	0	0	0	0	0	0	0	12	d__Bacteria; p__Proteobacteria; c__Alphaproteobacteria; o__Azospirillales; f__Azospirillaceae; g__Azospirillum; s__Azospirillum brasilense
ASV1874	0	0	0	0	49	0	0	0	d__Bacteria; p__Proteobacteria; c__Gammaproteobacteria; o__Steroidobacterales; f__Woeseiaceae; g__Woeseia; s__uncultured bacterium
ASV1875	15	17	0	13	0	0	0	0	d__Bacteria; p__Nitrospirota; c__Nitrospiria; o__Nitrospirales; f__Nitrospiraceae; g__Nitrospira; s__uncultured bacterium
ASV1876	0	0	3	0	0	0	0	0	Unclassified
ASV1877	0	0	38	0	0	0	0	0	d__Bacteria; p__Chloroflexi; c__Ktedonobacteria; o__Ktedonobacterales; f__Ktedonobacteraceae; g__Thermosporothrix; s__uncultured bacterium
ASV1878	0	15	17	0	0	0	0	0	d__Bacteria; p__Acidobacteriota; c__Acidobacteriae; o__Bryobacterales; f__Bryobacteraceae; g__Bryobacter; s__uncultured bacterium
ASV1879	0	0	6	0	0	0	0	0	d__Bacteria; p__Firmicutes; c__Clostridia; o__Peptostreptococcales-Tissierellales; f__Peptostreptococcaceae; g__Romboutsia; s__uncultured bacterium
ASV1880	0	0	0	0	5	9	9	0	d__Bacteria; p__Chloroflexi; c__Anaerolineae; o__Anaerolineales; f__Anaerolineaceae; g__uncultured
ASV1881	0	0	0	0	10	7	17	0	d__Bacteria; p__Actinobacteriota; c__Acidimicrobiia; o__Microtrichales; f__Iamiaceae; g__Iamia
ASV1882	0	0	0	0	0	5	10	0	d__Bacteria; p__Firmicutes; c__Bacilli; o__Thermoactinomycetales; f__Thermoactinomycetaceae; g__Planifilum
ASV1883	0	0	0	0	12	0	0	14	d__Bacteria; p__Chloroflexi; c__Chloroflexia; o__Chloroflexales; f__Roseiflexaceae; g__uncultured; s__uncultured soil bacterium
ASV1884	0	0	0	0	0	10	0	0	d__Bacteria; p__Gemmatimonadota; c__Gemmatimonadetes; o__Gemmatimonadales; f__Gemmatimonadaceae; g__uncultured; s__uncultured bacterium
ASV1885	0	0	0	0	0	13	0	0	d__Bacteria; p__Acidobacteriota; c__Acidobacteriae; o__Acidobacteriales; f__Koribacteraceae; g__Candidatus Koribacter; s__uncultured bacterium
ASV1886	0	0	0	0	8	0	0	0	d__Bacteria; p__Actinobacteriota; c__Acidimicrobiia; o__Microtrichales; f__Ilumatobacteraceae; g__uncultured; s__uncultured bacterium
ASV1887	0	0	0	0	0	0	55	0	d__Bacteria; p__Acidobacteriota; c__Vicinamibacteria; o__Vicinamibacterales; f__Vicinamibacteraceae; g__Luteitalea
ASV1888	0	0	0	0	0	16	10	24	d__Bacteria; p__Proteobacteria; c__Gammaproteobacteria
ASV1889	0	2	0	0	0	0	0	0	d__Bacteria; p__Proteobacteria; c__Gammaproteobacteria; o__Pseudomonadales; f__Moraxellaceae; g__uncultured; s__metagenome
ASV1890	0	0	0	0	0	0	4	22	d__Bacteria; p__Acidobacteriota; c__Blastocatellia; o__Pyrinomonadales; f__Pyrinomonadaceae; g__RB41; s__uncultured bacterium
ASV1891	0	0	0	0	0	10	0	0	d__Bacteria; p__Proteobacteria; c__Alphaproteobacteria; o__Micropepsales; f__Micropepsaceae
ASV1892	0	0	0	0	0	9	0	0	d__Bacteria; p__Chloroflexi; c__Anaerolineae; o__Anaerolineales; f__Anaerolineaceae; g__uncultured; s__uncultured prokaryote
ASV1893	0	0	0	0	9	16	0	0	d__Bacteria; p__Planctomycetota; c__Phycisphaerae; o__Tepidisphaerales; f__Tepidisphaeraceae; g__Tepidisphaera; s__uncultured bacterium
ASV1894	0	0	0	0	14	0	0	0	d__Bacteria; p__Dependentiae; c__Babeliae; o__Babeliales; f__Babeliaceae; g__Candidatus Babela
ASV1895	0	0	0	0	0	25	0	36	d__Bacteria; p__Actinobacteriota; c__Thermoleophilia; o__Solirubrobacterales; f__Solirubrobacteraceae; g__Conexibacter; s__uncultured bacterium
ASV1896	7	0	0	0	0	0	0	0	d__Bacteria; p__Acidobacteriota; c__Acidobacteriae; o__Acidobacteriales; f__Acidobacteriaceae (Subgroup 1); g__Granulicella
ASV1897	0	0	0	0	12	0	49	0	d__Bacteria; p__Acidobacteriota; c__Acidobacteriae
ASV1898	0	0	0	0	0	10	0	0	d__Bacteria; p__Actinobacteriota; c__Actinobacteria; o__Micromonosporales; f__Micromonosporaceae; g__Actinoplanes; s__uncultured bacterium
ASV1899	0	0	0	8	0	0	0	0	d__Bacteria; p__Firmicutes; c__Bacilli; o__Paenibacillales; f__Paenibacillaceae; g__Paenibacillus
ASV1900	0	0	0	0	0	0	21	0	d__Bacteria; p__Chloroflexi; c__Chloroflexia; o__Thermomicrobiales; f__Thermomicrobiaceae; g__Nitrolancea
ASV1901	4	0	5	0	0	0	0	0	d__Bacteria; p__Chloroflexi; c__Anaerolineae; o__Anaerolineales; f__Anaerolineaceae
ASV1902	0	0	48	0	0	0	0	0	d__Bacteria; p__Verrucomicrobiota; c__Verrucomicrobiae; o__Pedosphaerales; f__Pedosphaeraceae; g__uncultured; s__uncultured bacterium
ASV1903	0	0	0	9	0	0	0	0	d__Bacteria; p__Chloroflexi; c__Ktedonobacteria; o__Ktedonobacterales; f__Ktedonobacteraceae; g__1921-3; s__uncultured Ktedonobacter sp.
ASV1904	0	0	0	0	0	0	0	55	d__Bacteria; p__Acidobacteriota; c__Thermoanaerobaculia; o__Thermoanaerobaculales; f__Thermoanaerobaculaceae; g__Subgroup 10; s__uncultured bacterium
ASV1905	12	0	0	36	0	0	0	0	d__Bacteria; p__Acidobacteriota; c__Acidobacteriae; o__Acidobacteriales; f__Acidobacteriaceae (Subgroup 1); g__uncultured; s__uncultured bacterium
ASV1906	0	0	0	0	0	0	26	0	d__Bacteria; p__Actinobacteriota; c__Actinobacteria; o__Micromonosporales; f__Micromonosporaceae; g__Actinoplanes
ASV1907	0	0	23	0	0	0	0	0	d__Bacteria; p__Bacteroidota; c__Bacteroidia; o__Sphingobacteriales; f__Sphingobacteriaceae; g__Mucilaginibacter
ASV1908	0	0	0	0	0	27	0	0	d__Bacteria; p__Acidobacteriota; c__Blastocatellia; o__Blastocatellales; f__Blastocatellaceae; g__uncultured; s__uncultured Acidobacteria bacterium
ASV1909	0	26	11	0	0	0	0	0	d__Bacteria; p__Firmicutes; c__Desulfotomaculia; o__Ammonifexales; f__Ammonificaceae; g__Thermodesulfitimonas; s__uncultured bacterium
ASV1910	0	0	0	0	0	0	0	24	d__Bacteria; p__Proteobacteria; c__Alphaproteobacteria; o__Azospirillales; f__Azospirillaceae; g__Skermanella; s__uncultured bacterium
ASV1911	0	0	0	0	0	0	17	0	d__Bacteria
ASV1912	0	0	0	0	0	0	0	14	d__Bacteria; p__Acidobacteriota; c__Blastocatellia; o__Pyrinomonadales; f__Pyrinomonadaceae; g__RB41
ASV1913	0	0	0	0	10	0	0	16	d__Bacteria; p__Verrucomicrobiota; c__Verrucomicrobiae; o__Pedosphaerales; f__Pedosphaeraceae; g__uncultured; s__uncultured bacterium
ASV1914	0	0	21	8	0	0	0	0	d__Bacteria; p__Verrucomicrobiota; c__Verrucomicrobiae; o__Pedosphaerales; f__Pedosphaeraceae; g__ADurb.Bin063-1
ASV1915	0	13	31	6	0	0	0	0	d__Bacteria; p__Bacteroidota; c__Bacteroidia; o__Chitinophagales; f__Chitinophagaceae; g__Sediminibacterium; s__uncultured bacterium
ASV1916	0	0	0	10	0	0	0	0	Unclassified
ASV1917	0	0	20	0	0	0	0	0	d__Bacteria; p__Gemmatimonadota; c__Gemmatimonadetes; o__Gemmatimonadales; f__Gemmatimonadaceae; g__Gemmatimonas; s__uncultured bacterium
ASV1918	0	0	0	0	0	6	17	21	d__Bacteria; p__Proteobacteria; c__Gammaproteobacteria; o__Steroidobacterales; f__Steroidobacteraceae
ASV1919	0	29	0	0	0	0	0	0	d__Bacteria; p__Proteobacteria; c__Alphaproteobacteria; o__Acetobacterales; f__Acetobacteraceae; g__Acidicaldus; s__uncultured bacterium
ASV1920	17	0	0	84	0	0	0	0	d__Bacteria; p__Acidobacteriota; c__Acidobacteriae; o__Acidobacteriales
ASV1921	0	16	0	6	0	0	0	0	Unclassified
ASV1922	0	0	7	0	0	0	0	0	d__Bacteria; p__Chloroflexi; c__Ktedonobacteria; o__Ktedonobacterales; f__Ktedonobacteraceae; g__uncultured; s__uncultured bacterium
ASV1923	0	0	0	0	15	0	0	0	d__Bacteria; p__Verrucomicrobiota; c__Verrucomicrobiae; o__Pedosphaerales; f__Pedosphaeraceae; g__DEV008; s__uncultured bacterium
ASV1924	11	0	0	0	0	0	0	0	d__Bacteria; p__Planctomycetota; c__Planctomycetes; o__Gemmatales; f__Gemmataceae; g__uncultured; s__uncultured bacterium
ASV1925	0	0	0	0	0	0	0	63	d__Bacteria; p__Acidobacteriota
ASV1926	6	0	5	0	0	0	0	0	d__Bacteria; p__Firmicutes; c__Thermacetogenia; o__Thermacetogeniales; f__Thermacetogeniaceae
ASV1927	0	0	0	0	0	0	0	9	d__Bacteria; p__Chloroflexi; c__Anaerolineae; o__Anaerolineales; f__Anaerolineaceae; g__RBG-16-58-14; s__uncultured bacterium
ASV1928	0	40	0	0	0	0	0	0	Unclassified
ASV1929	0	64	0	35	0	0	0	0	d__Bacteria; p__Actinobacteriota; c__Actinobacteria; o__Frankiales; f__Acidothermaceae; g__Acidothermus; s__uncultured bacterium
ASV1930	12	0	0	36	0	0	0	0	d__Bacteria; p__Chloroflexi; c__Chloroflexia; o__Thermobaculales; f__Thermobaculaceae; g__Thermobaculum; s__Thermobaculum terrenum ATCC BAA-798
ASV1931	22	0	22	25	0	0	0	0	d__Bacteria; p__Bacteroidota; c__Bacteroidia; o__Chitinophagales; f__Chitinophagaceae; g__Ferruginibacter; s__uncultured bacterium
ASV1932	0	18	9	0	0	0	0	0	d__Bacteria; p__Chloroflexi; c__Anaerolineae; o__Anaerolineales; f__Anaerolineaceae; g__uncultured
ASV1933	0	0	0	0	0	22	5	19	d__Bacteria; p__Gemmatimonadota; c__Gemmatimonadetes; o__Gemmatimonadales; f__Gemmatimonadaceae; g__uncultured; s__uncultured bacterium
ASV1934	0	0	0	0	16	0	0	0	d__Bacteria; p__Verrucomicrobiota; c__Verrucomicrobiae; o__Pedosphaerales; f__Pedosphaeraceae; g__SCGC AAA164-E04
ASV1935	0	0	0	0	0	7	0	0	d__Bacteria; p__Bacteroidota; c__Bacteroidia; o__Sphingobacteriales; f__Sphingobacteriaceae; g__Pedobacter; s__uncultured bacterium
ASV1936	0	0	0	0	0	12	0	18	d__Bacteria; p__Actinobacteriota; c__Acidimicrobiia; o__Microtrichales; f__Iamiaceae; g__Iamia
ASV1937	0	4	0	0	0	0	0	0	d__Bacteria; p__Firmicutes
ASV1938	0	0	0	0	0	0	16	0	d__Bacteria; p__Chloroflexi; c__Chloroflexia; o__Chloroflexales; f__Roseiflexaceae; g__uncultured; s__uncultured bacterium
ASV1939	0	0	0	11	0	0	0	0	d__Bacteria; p__Patescibacteria; c__Saccharimonadia; o__Saccharimonadales; f__Saccharimonadaceae; g__TM7x
ASV1940	0	0	0	0	20	0	0	27	d__Bacteria; p__Desulfobacterota; c__Syntrophobacteria; o__Syntrophobacterales; f__Thermodesulforhabdaceae; g__Thermodesulforhabdus
ASV1941	0	0	0	0	0	9	12	19	d__Bacteria; p__Chloroflexi; c__Anaerolineae; o__Anaerolineales; f__Anaerolineaceae; g__uncultured; s__uncultured bacterium
ASV1942	0	0	0	0	3	4	7	0	d__Bacteria; p__Chloroflexi; c__Chloroflexia; o__Thermomicrobiales; f__Thermomicrobiaceae; g__Nitrolancea; s__uncultured bacterium
ASV1943	8	11	0	0	0	0	0	0	d__Bacteria; p__Firmicutes; c__Clostridia; o__Peptostreptococcales-Tissierellales; f__Peptostreptococcaceae; g__Terrisporobacter; s__uncultured bacterium
ASV1944	3	0	0	0	0	0	0	0	d__Bacteria; p__Proteobacteria; c__Gammaproteobacteria; o__Burkholderiales; f__Nitrosomonadaceae; g__mle1-7
ASV1945	0	0	0	0	11	12	11	0	d__Bacteria; p__Chloroflexi; c__Anaerolineae; o__Caldilineales; f__Caldilineaceae; g__uncultured; s__uncultured bacterium
ASV1946	0	0	0	0	0	12	0	0	d__Bacteria; p__Proteobacteria; c__Alphaproteobacteria; o__Sphingomonadales; f__Sphingomonadaceae; g__Sphingomonas; s__Sphingomonas astaxanthinifaciens
ASV1947	0	0	0	0	0	0	0	18	d__Bacteria; p__Chloroflexi; c__Anaerolineae; o__Anaerolineales; f__Anaerolineaceae; g__uncultured; s__uncultured bacterium
ASV1948	8	0	0	0	0	0	0	0	d__Bacteria; p__Planctomycetota; c__Planctomycetes; o__Isosphaerales; f__Isosphaeraceae; g__uncultured; s__uncultured Singulisphaera sp.
ASV1949	0	0	0	0	7	6	6	7	d__Bacteria; p__Chloroflexi; c__Anaerolineae; o__Caldilineales; f__Caldilineaceae; g__Litorilinea; s__uncultured bacterium
ASV1950	0	0	24	0	0	0	0	0	d__Bacteria; p__Bacteroidota; c__Bacteroidia; o__Chitinophagales; f__Chitinophagaceae; g__uncultured; s__uncultured bacterium
ASV1951	0	0	0	0	10	11	10	8	d__Bacteria; p__Actinobacteriota; c__Acidimicrobiia; o__Acidimicrobiales; f__Acidimicrobiaceae; g__uncultured; s__uncultured bacterium
ASV1952	12	0	9	0	0	0	0	0	d__Bacteria; p__Acidobacteriota; c__Acidobacteriae; o__Acidobacteriales; f__Koribacteraceae; g__Candidatus Koribacter; s__uncultured bacterium
ASV1953	0	0	0	0	11	11	0	6	d__Bacteria; p__Gemmatimonadota; c__Gemmatimonadetes; o__Gemmatimonadales; f__Gemmatimonadaceae; g__uncultured
ASV1954	0	15	0	0	0	0	0	0	d__Bacteria; p__Firmicutes; c__Bacilli; o__Paenibacillales; f__Paenibacillaceae; g__Paenibacillus
ASV1955	0	0	0	0	0	0	0	9	d__Bacteria; p__Acidobacteriota; c__Blastocatellia; o__Pyrinomonadales; f__Pyrinomonadaceae; g__RB41; s__uncultured bacterium
ASV1956	0	0	0	0	0	0	0	45	d__Bacteria; p__Planctomycetota; c__Planctomycetes; o__Gemmatales; f__Gemmataceae; g__Gemmata; s__uncultured bacterium
ASV1957	0	0	19	0	0	0	0	0	d__Bacteria; p__Proteobacteria; c__Gammaproteobacteria; o__Xanthomonadales; f__Xanthomonadaceae; g__Pseudoxanthomonas; s__Pseudoxanthomonas mexicana
ASV1958	7	0	25	17	0	0	0	0	d__Bacteria; p__Proteobacteria; c__Gammaproteobacteria; o__Burkholderiales; f__Oxalobacteraceae; g__Duganella
ASV1959	3	8	0	8	0	0	0	0	d__Bacteria; p__Chloroflexi; c__Ktedonobacteria; o__Ktedonobacterales; f__Ktedonobacteraceae; g__HSB OF53-F07; s__uncultured bacterium
ASV1960	0	19	9	0	0	0	0	0	d__Bacteria; p__Proteobacteria; c__Alphaproteobacteria; o__Acetobacterales; f__Acetobacteraceae; g__Acidiphilium; s__uncultured bacterium
ASV1961	0	0	0	0	15	0	19	0	d__Bacteria; p__Proteobacteria; c__Gammaproteobacteria; o__Burkholderiales; f__Comamonadaceae; g__uncultured; s__uncultured bacterium
ASV1962	0	0	0	0	33	11	18	0	d__Bacteria; p__Verrucomicrobiota; c__Verrucomicrobiae; o__Pedosphaerales; f__Pedosphaeraceae; g__uncultured; s__uncultured bacterium
ASV1963	0	0	0	0	0	0	0	21	d__Bacteria; p__Gemmatimonadota; c__Gemmatimonadetes; o__Gemmatimonadales; f__Gemmatimonadaceae; g__uncultured; s__uncultured bacterium
ASV1964	0	0	0	0	9	15	19	0	d__Bacteria; p__Chloroflexi; c__Anaerolineae; o__Anaerolineales; f__Anaerolineaceae; g__uncultured
ASV1965	0	0	0	0	0	17	21	0	d__Bacteria
ASV1966	0	0	0	0	16	0	0	0	d__Bacteria; p__Proteobacteria; c__Gammaproteobacteria; o__Acidithiobacillales; f__Acidithiobacillaceae; g__TX1A-55; s__uncultured bacterium
ASV1967	0	10	19	0	0	0	0	0	d__Bacteria; p__Proteobacteria; c__Gammaproteobacteria; o__Gammaproteobacteria Incertae Sedis; f__Unknown Family; g__Acidibacter; s__uncultured bacterium
ASV1968	4	4	9	0	0	0	0	0	d__Bacteria; p__Firmicutes; c__Desulfotomaculia
ASV1969	0	0	0	0	0	0	0	24	d__Bacteria; p__Methylomirabilota; c__Methylomirabilia; o__Methylomirabilales; f__Methylomirabilaceae; g__Sh765B-TzT-35; s__uncultured bacterium
ASV1970	0	0	0	0	0	0	20	8	d__Bacteria; p__Acidobacteriota; c__Thermoanaerobaculia; o__Thermoanaerobaculales; f__Thermoanaerobaculaceae; g__Subgroup 10; s__uncultured bacterium
ASV1971	0	0	0	0	0	0	11	10	d__Bacteria; p__Proteobacteria; c__Alphaproteobacteria; o__Caulobacterales; f__Hyphomonadaceae; g__Hirschia; s__uncultured bacterium
ASV1972	0	0	0	0	0	0	8	11	d__Bacteria; p__Gemmatimonadota; c__Gemmatimonadetes; o__Gemmatimonadales; f__Gemmatimonadaceae; g__uncultured; s__uncultured bacterium
ASV1973	46	0	0	0	0	0	0	0	d__Bacteria; p__Desulfobacterota
ASV1974	0	0	0	0	0	0	0	24	d__Bacteria; p__Actinobacteriota; c__Thermoleophilia; o__Solirubrobacterales; f__Solirubrobacteraceae
ASV1975	0	0	0	0	0	11	0	0	d__Bacteria; p__Verrucomicrobiota; c__Verrucomicrobiae; o__Pedosphaerales; f__Pedosphaeraceae; g__ADurb.Bin063-1
ASV1976	0	0	28	0	0	0	0	0	d__Bacteria; p__Proteobacteria; c__Gammaproteobacteria; o__Xanthomonadales; f__Rhodanobacteraceae
ASV1977	0	8	0	10	0	0	0	0	d__Bacteria; p__Chloroflexi; c__Anaerolineae; o__Anaerolineales; f__Anaerolineaceae; g__uncultured; s__uncultured Chloroflexi bacterium
ASV1978	0	0	0	15	0	0	0	0	d__Bacteria
ASV1979	22	0	0	20	0	0	0	0	d__Bacteria; p__Firmicutes; c__Negativicutes; o__Veillonellales-Selenomonadales; f__Sporomusaceae; g__Sporomusa; s__Sporomusa acidovorans
ASV1980	0	0	0	0	0	0	11	8	d__Bacteria; p__Myxococcota; c__Myxococcia; o__Myxococcales; f__Anaeromyxobacteraceae; g__Anaeromyxobacter; s__uncultured bacterium
ASV1981	38	0	14	0	0	0	0	0	d__Bacteria; p__Desulfobacterota; c__Desulfobacteria; o__Desulfobacterales; f__Desulfosarcinaceae
ASV1982	9	0	0	0	0	0	0	0	d__Bacteria; p__Gemmatimonadota; c__Gemmatimonadetes; o__Gemmatimonadales; f__Gemmatimonadaceae; g__Gemmatimonas
ASV1983	0	0	0	0	12	0	0	12	d__Bacteria; p__Acidobacteriota; c__Vicinamibacteria; o__Vicinamibacterales; f__Vicinamibacteraceae; g__uncultured; s__uncultured bacterium
ASV1984	0	0	0	0	17	6	0	0	d__Bacteria
ASV1985	0	0	0	0	7	5	0	3	d__Bacteria; p__Verrucomicrobiota; c__Verrucomicrobiae; o__Chthoniobacterales; f__Chthoniobacteraceae; g__Candidatus Udaeobacter; s__uncultured bacterium
ASV1986	0	0	0	0	20	16	13	0	d__Bacteria
ASV1987	0	0	0	0	0	7	6	10	d__Bacteria
ASV1988	0	29	0	27	0	0	0	0	d__Bacteria; p__Acidobacteriota; c__Acidobacteriae; o__Bryobacterales; f__Bryobacteraceae; g__Bryobacter
ASV1989	0	0	0	0	0	0	7	0	d__Bacteria; p__Proteobacteria; c__Gammaproteobacteria; o__Chromatiales; f__Chromatiaceae
ASV1990	0	0	0	0	0	18	0	0	d__Bacteria; p__Proteobacteria; c__Alphaproteobacteria; o__Sphingomonadales; f__Sphingomonadaceae; g__Sphingomonas; s__uncultured bacterium
ASV1991	0	0	0	0	18	0	17	0	d__Bacteria; p__Planctomycetota; c__Planctomycetes; o__Pirellulales; f__Pirellulaceae; g__Pir4 lineage; s__uncultured bacterium
ASV1992	0	33	0	0	0	0	0	0	d__Bacteria; p__Proteobacteria; c__Alphaproteobacteria; o__Azospirillales; f__Azospirillaceae; g__Nitrospirillum; s__Nitrospirillum amazonense
ASV1993	0	0	0	0	0	93	0	0	d__Bacteria; p__Firmicutes; c__Bacilli; o__Alicyclobacillales; f__Alicyclobacillaceae; g__Effusibacillus
ASV1994	0	0	0	0	0	8	4	9	d__Bacteria; p__Planctomycetota; c__Planctomycetes; o__Gemmatales; f__Gemmataceae; g__uncultured; s__uncultured bacterium
ASV1995	0	92	0	0	0	0	0	0	d__Bacteria; p__Actinobacteriota; c__Thermoleophilia; o__Solirubrobacterales; f__Solirubrobacteraceae; g__Conexibacter; s__uncultured bacterium
ASV1996	0	0	4	0	0	12	0	0	d__Bacteria; p__Planctomycetota; c__Phycisphaerae; o__Tepidisphaerales; f__Tepidisphaeraceae; g__Tepidisphaera; s__uncultured bacterium
ASV1997	0	0	0	0	17	0	0	0	Unclassified
ASV1998	0	0	0	0	0	0	4	4	d__Bacteria; p__Chloroflexi; c__Chloroflexia; o__Chloroflexales; f__Roseiflexaceae; g__uncultured; s__uncultured bacterium
[truncated: 2,405 more rows]

## Sheet: Table S2_Phylum
Table S2 Relative abundance of rhizosphere bacterial phylum level
Taxa	GX3_1	GX3_2	GX3_3	GX3_4	JS3_1	JS3_2	JS3_3	JS3_4	GX_average	JS_average	p_value
p__Acidobacteriota	0.291416	0.190385	0.159881	0.222691	0.430038	0.251947	0.299467	0.373326	21.61 ± 5.64%	33.87 ± 7.88%	<0.05
p__Proteobacteria	0.22216	0.32215	0.348164	0.221047	0.144857	0.255397	0.228306	0.188151	27.84 ± 6.64%	20.42 ± 4.82%	ns
p__Chloroflexi	0.119016	0.102145	0.103795	0.130821	0.0942794	0.0832157	0.10086	0.090536	11.39 ± 1.36%	9.22 ± 0.74%	ns
p__Firmicutes	0.140962	0.13833	0.104868	0.153994	0.0219255	0.0289582	0.0241599	0.0258015	13.45 ± 2.09%	2.52 ± 0.3%	<0.01
p__Actinobacteriota	0.0631316	0.0877229	0.0880625	0.0746686	0.0590492	0.0850452	0.0794429	0.0698128	7.84 ± 1.19%	7.33 ± 1.14%	ns
p__Gemmatimonadota	0.0231704	0.0303955	0.0336109	0.0270626	0.0751445	0.0867179	0.084718	0.0845345	2.86 ± 0.45%	8.28 ± 0.52%	<0.001
p__Bacteroidota	0.0393998	0.0513828	0.055933	0.0542895	0.0234702	0.0636663	0.0224192	0.0154399	5.03 ± 0.75%	3.12 ± 2.19%	ns
p__Planctomycetota	0.0201592	0.0173688	0.0159371	0.0212556	0.0183377	0.0199153	0.0180408	0.0214414	1.87 ± 0.25%	1.94 ± 0.16%	ns
p__Verrucomicrobiota	0.0142901	0.00925304	0.0151709	0.0114495	0.0233705	0.0214312	0.0217861	0.023801	1.25 ± 0.27%	2.26 ± 0.12%	<0.01
p__Cyanobacteria	0.0124018	0.00542776	0.0269704	0.0359373	0.00214271	0.0220584	0.00263755	0.00189792	2.02 ± 1.38%	0.72 ± 0.99%	ns
p__Myxococcota	0.00780851	0.00516929	0.00771313	0.00591651	0.00802272	0.0140609	0.0188848	0.0128238	0.67 ± 0.13%	1.34 ± 0.45%	<0.05
p__Nitrospirota	0.00403185	0.00558284	0.00398427	0.0047113	0.0281044	0.0148973	0.00712138	0.0106181	0.46 ± 0.07%	1.52 ± 0.92%	ns
p__Desulfobacterota	0.00316423	0.00692685	0.00270726	0.00706694	0.00428543	0.00219539	0.0117635	0.0127212	0.5 ± 0.24%	0.77 ± 0.53%	ns
p__Entotheonellaeota	0	0	0	0	0.00388678	0.00663844	0.0169331	0.0031803	0 ± 0%	0.77 ± 0.64%	ns
p__Patescibacteria	0.00520568	0.00470406	0.010778	0.00662868	0	0	0	0	0.68 ± 0.28%	0 ± 0%	<0.05
p__Bdellovibrionota	0.0103093	0.00728871	0.00510803	0.00301304	0	0	0	0	0.64 ± 0.31%	0 ± 0%	<0.05
p__Armatimonadota	0.00209248	0.00113724	0.00148133	0.00136956	0.00269085	0.00229993	0.00284855	0.00328289	0.15 ± 0.04%	0.28 ± 0.04%	<0.01
p__Synergistota	0.00260284	0.00408374	0.00183889	0.00339652	0	0	0	0	0.3 ± 0.1%	0 ± 0%	<0.01
p__Thermotogota	0.00316423	0.00134402	0.00132809	0.00191739	0	0	0	0	0.19 ± 0.09%	0 ± 0%	<0.05
p__Methylomirabilota	0	0	0	0	0.000398645	0.000627254	0.00321781	0.00220569	0 ± 0%	0.16 ± 0.13%	ns

## Sheet: Table S3 soil_VOCs
Table S3 Soil VOC profiles from the suppressive (JS) and conducive (GX) soils
VOCs_names	Retention time(RT)	GX_1	GX_2	GX_3	GX_4	JS_1	JS_2	JS_3	JS_4	Method	Class	CAS	Product code	Brand
2-Buten-1-ol	2.355	13980125	35732482	17136570	9974354	0	0	0	0	SPME	Others
2-Pentene, 3,4-dimethyl-, (Z)-	3.144	0	0	0	0	0	0	0	0	Liquid	Alkenes
Cyclohexane	3.155	0	0	0	0	0	9.92369e+06	6.6158e+06	9.55615e+06	Liquid	Alkanes
Methyl isobutyrate	3.155	0	0	0	0	0	0	0	0	Liquid	Others
Hexane, 2-methyl-	3.16	0	0	0	0	629782	1.63743e+06	395863	701758	Liquid	Alkanes
trans-beta-Ionone	3.274	0	0	0	0	2028523	4199135	1188859	2534710	SPME	Terpenes
Benzene	3.274	0	0	0	0	0	0	0	0	SPME	Aromatic
Hexane, 2,5-dimethyl-	3.284	0	2.2572e+06	1.00706e+06	2.81282e+06	498679	757992	558521	329128	Liquid	Alkanes
Heptane	3.549	0	0	0	0	402013	3.41711e+06	469015	5.56118e+06	Liquid	Alkanes
1-Penten-3-one	3.58	696676220	461064280	190737471	331647254	0	0	0	0	SPME	Ketones
Propanoic acid, 2-propenyl ester	3.955	0	0	0	0	3.12615e+06	700688	0	0	SPME+ Liquid	Esters
Toluene	4.006	0	0	0	0	0	0	0	0	Liquid	Alkanes
Pentane, 3-ethyl-	4.016	931724	0	1.0834e+06	975060	0	0	0	0	Liquid	Alkanes
no hit4.063	4.063	0	0	0	0	0	400945	1.07526e+06	1.71313e+06	Liquid	Nohit
Butanoic acid, 2-methyl-, methyl ester	4.265	564830	1.54925e+06	96828	1.17807e+06	1.26072e+06	1.00343e+06	0	0	Liquid	Esters
3,3-Dimethyl-1,2-epoxybutane	4.727	55920499	4610643	18626706	37403826	0	0	0	0	SPME	Ethers
Hexane, 2,4-dimethyl-	4.753	86274.8	690199	0	517649	0	0	0	0	Liquid	Alkanes
1-Pentanol	4.766	22135198	5763303	4470409	6649569	0	0	0	0	SPME	Alcohols
Hexane, 2,3,5-trimethyl-	5.1	1.46139e+06	616522	68502.5	1.46139e+06	0	0	0	0	Liquid	Alkanes
Hexane, 3-ethyl-	5.282	0	0	0	0	0	0	0	0	Liquid	Alkanes
Hexane, 3,3-dimethyl-	5.303	0	0	0	0	0	0	0	0	Liquid	Alkanes
1-Hexene, 3,5,5-trimethyl-	5.744	0	0	0	0	0	0	0	0	Liquid	Alcohols
3-Heptene, 2,6-dimethyl-	6.169	0	0	0	0	0	0	0	0	Liquid	Alkenes
beta-Phellandrene	6.225	466004	115266	447041	581837	8114091	11547620	7133156	5914324	SPME	Terpenes	555-10-2	P916917	Macklin
Hexanal	6.225	326202912	265111961	154974195	320841704	0	0	0	0	SPME	Aldehydes
Octane, 4-methyl-	6.34	4.00184e+06	4.57353e+06	0	8.91838e+06	0	0	0	0	Liquid	Alkanes
p-Xylene	6.475	0	0	0	0	0	0	0	0	Liquid	Aromatic
Hexane, 4-ethyl-2-methyl-	7.254	0	0	0	0	0	0	0	0	Liquid	Alkanes
Heptane, 4,4-dimethyl-	7.269	0	0	0	0	0	0	0	0	Liquid	Alkanes
Heptane, 2,4-dimethyl-	7.28	0	0	0	0	943891	10149.4	111643	10149.4	Liquid	Alkanes
Acetyl valeryl	7.291	73395655	32274500	9685887	34079041	0	0	0	0	SPME	Esters
no hit7.508	7.508	0	0	0	0	223032	76667.2	620307	620307	Liquid	Nohit
Heptane, 5-ethyl-2-methyl-	7.539	0	0	0	0	84156	530183	673248	420780	Liquid	Alkanes
Hexane, 3-ethyl-2-methyl-	7.705	0	0	0	0	0	0	0	0	Liquid	Alkanes
Heptane, 2,3-dimethyl-	7.715	0	0	0	0	0	0	0	0	Liquid	Alkanes
no hit7.731	7.731	0	0	0	0	398595	41233.9	611637	398595	Liquid	Nohit
Hexane, 3-ethyl-4-methyl-	7.892	0	0	0	0	313534	587877	1.04511e+06	1.17575e+06	Liquid	Alkanes
Octane, 3,5-dimethyl-	8.115	0	0	0	0	0	0	0	0	Liquid	Alkanes
Octane, 2-methyl-	8.12	0	0	0	0	0	0	0	0	Liquid	Alkanes
no hit8.19	8.19	0	0	0	0	2434227	2939394	3447692	2450220	SPME	Nohit
Octane, 2,7-dimethyl-	8.198	729309	642943	143942	76769.3	692122	971632	399301	332751	Liquid	Alkanes
Octane, 2,5-dimethyl-	8.203	0	0	0	0	249101	388304	586120	307713	Liquid	Alkanes
1-Hexanol	8.272	318047839	501407404	251833068	262657976	0	0	0	0	SPME	Alcohols
o-Xylene	8.707	24465218	34579821	6705614	17455119	0	0	0	0	SPME	Aromatic
Styrene	8.709	0	0	0	0	0	0	0	0	SPME	Others
Heptane, 3-ethyl-	8.816	241795	929981	0	37199.2	0	0	0	0	Liquid	Alkanes
Heptane, 2-chloro-	8.826	0	0	0	0	0	0	0	0	Liquid	Alkanes
Octane, 4,5-dimethyl-	8.831	0	0	0	0	828265	816599	548288	0	Liquid	Alkanes
Hexane, 3-ethyl-2,5-dimethyl-	8.883	0	0	0	0	0	0	0	0	Liquid	Alkanes
Octane, 2,3-dimethyl-	8.893	0	0	0	0	4.2249e+06	3.16868e+06	3.89136e+06	0	Liquid	Alkanes
no hit8.95	8.95	0	0	0	0	0	0	0	0	Liquid	Nohit
Heptane, 4-propyl-	8.982	0	0	0	0	0	1.29516e+06	1.24719e+06	4.12532e+06	Liquid	Alkanes
no hit8.982	8.982	0	0	0	0	0	0	0	0	Liquid	Nohit
Heptanal	9.016	16310146	40343124	17881638	14961530	0	0	0	0	SPME	Aldehydes
Octane, 3,6-dimethyl-	9.044	0	0	0	0	0	0	0	0	Liquid	Alkanes
4,4-Dimethyl octane	9.127	0	487853	3.46376e+06	2.29291e+06	549693	7.0544e+06	4.21432e+06	4.03108e+06	Liquid	Alkanes
Nonane	9.189	0	0	0	0	0	1.39102e+06	2.5502e+06	927346	Liquid	Alkanes
no hit9.329	9.329	0	0	0	0	0	0	0	0	Liquid	Nohit
Octane, 3,3-dimethyl-	9.988	517191	1.04562e+06	1.00065e+06	326055	741870	1.05298e+06	682042	682042	Liquid	Alkanes
Heptane, 3-ethyl-4-methyl-	10.107	2.11072e+06	28142.9	0	1.182e+06	0	0	0	0	Liquid	Alkanes
3-Ethyl-3-methylheptane	10.113	0	0	0	0	6.77726e+06	5.53636e+06	6.01363e+06	8.49544e+06	Liquid	Alkanes
Heptane, 3,3,4-trimethyl-	10.201	0	0	0	0	567801	231326	294415	0	Liquid	Alkanes
Heptane, 3-ethyl-2-methyl-	10.206	0	0	0	0	0	0	0	0	Liquid	Alkanes
Octane, 4-ethyl-	10.206	0	0	0	0	2.94167e+06	3.177e+06	706000	823667	Liquid	Alkanes
no hit10.211	10.211	548318	73109	36554.5	0	0	0	0	0	Liquid	Nohit
Octane, 3-ethyl-	10.31	1.41504e+07	4.24512e+06	4.7168e+06	8.8047e+06	6.8928e+06	8.91021e+06	1.31131e+07	4.03481e+06	Liquid	Alkanes
2-Heptanone, 6-methyl-	10.373	4543541	4149579	2160698	3241665	18256704	23620133	20210610	30416522	SPME	Ketones	928-68-7	M849453	Macklin
Octane, 2,6-dimethyl-	10.403	0	0	0	0	0	0	0	0	Liquid	Alkanes
Benzaldehyde	10.58	104850936	139471945	107289828	84782005	119682839	197359331	156929442	156307127	SPME	Aldehydes
Mesitylene	10.725	6990062	23053214	3725341	5818373	0	0	0	0	SPME	Aromatic
Cyclopropane, 1-ethyl-2-pentyl-	10.824	0	0	0	0	0	0	0	0	Liquid	Alkanes
1-Octen-3-one	10.96	0	0	0	0	0	0	0	0	SPME	Ketones
Nonane, 3,7-dimethyl-	11.047	0	0	0	0	1.16113e+06	820532	464452	1.37787e+06	Liquid	Alkanes
3-Octanone	11.19	67570603	81838910	57370255	50702964	5578437	1784632	3091034	4646969	SPME	Ketones
Nonane, 4,5-dimethyl-	11.202	0	0	0	0	0	0	0	0	Liquid	Alkanes
Furan, 2-pentyl-	11.28	149121331	360782799	139327762	190343913	12373988	4619048	9391989	5576362	SPME	Others
3-Octanol	11.482	27960250	31121839	5215478	16623923	0	0	0	0	SPME	Aldehydes
Octanal	11.595	19805177	12679268	11176024	19948707	0	0	0	0	SPME	Aldehydes
2,6-Dimethyl-6-trifluoroacetoxyoctane	11.643	296525	498162	1.00818e+06	937019	0	0	0	0	Liquid	Alkanes
1-Decene, 8-methyl-	11.649	0	0	0	0	952688	1.1644e+06	599841	1.09383e+06	Liquid	Alkenes
Cyclooctane, 1,4-dimethyl-, trans-	11.649	0	0	0	0	0	0	0	0	Liquid	Alkenes
no hit11.7	11.7	0	0	0	0	710176	51964.1	69285.4	718836	Liquid	Nohit
2-Methylenebornane	12.004	0	0	0	0	0	0	0	0	SPME	Terpenes
2-Methyl-2-bornene	12.012	307562746	519849975	61840665	272632329	0	0	0	0	SPME	Terpenes
no hit12.22	12.22	0	0	0	0	0	0	0	0	SPME	Nohit
Eucalyptol	12.31	143296279	299691782	20861911	52365356	0	0	0	0	SPME	Others
Decane, 3-methyl-	12.759	0	0	0	0	1.08786e+06	706550	874776	33645.2	Liquid	Alkanes
no hit12.764	12.764	0	0	0	0	0	0	0	0	Liquid	Nohit
Decane, 2-methyl-	12.857	0	0	0	0	0	0	0	0	Liquid	Alkanes
no hit12.869	12.869	0	0	0	0	9128352	11022729	10818621	7688621	SPME	Nohit
Benzene, n-butyl-	12.87	0	0	0	0	0	0	0	0	SPME	Aromatic
no hit12.871	12.871	0	0	0	0	0	0	0	0	SPME	Nohit
no hit12.977	12.977	0	0	0	0	0	0	0	0	Liquid	Nohit
Decane, 3,7-dimethyl-	13.226	4.59809e+06	7.52415e+06	5.0161e+06	1.06592e+07	573377	362133	844977	221304	Liquid	Alkanes
2H-3,9a-Methano-1-benzoxepin, octahydro-2,2,5a,9-tetramethyl-, [3R-(3alpha,5aalpha,9alpha,9aalpha)]-	13.27	0	0	0	0	0	0	0	0	SPME	Others
1-Octanol	13.27	76890686	40343124	29057662	28260668	0	0	0	0	SPME	Alcohols
Decane, 2,5-dimethyl-	13.335	0	0	0	0	635049	278280	392446	463800	Liquid	Alkanes
Undecane, 6-methyl-	13.34	0	0	0	0	903288	752740	790377	602192	Liquid	Alkanes
Nonane, 3-methyl-5-propyl-	13.428	281106	491935	292819	0	4.38646e+06	2.32224e+06	4.23164e+06	2.16743e+06	Liquid	Alkanes
1H-Indene, 1-ethylideneoctahydro-7a-methyl-, (1E,3aalpha,7abeta)-	13.46	0	0	0	0	0	0	0	0	SPME	Aromatic
1-Nitro-4-(trifluoromethoxy)benzene	13.46	182906633	278943889	93133531	128835399	197780963	341179694	487432357	152082610	SPME	Aromatic
1H-Indene, 1-ethylideneoctahydro-7a-methyl-, (1Z,3aalpha,7abeta)-	13.633	0	0	0	0	0	0	0	0	SPME	Aromatic
Pyrazine, 2-methoxy-3-(1-methylethyl)-	13.633	982103768	723870919	274930183	464638634	0	0	0	0	SPME	Others
Benzene, 4-ethenyl-1,2-dimethyl-	13.67	0	0	0	0	4057045	0	3566578	3379614	SPME	Aromatic
no hit13.68	13.68	0	0	0	0	0	0	0	0	SPME	Nohit
Octane, 4,5-diethyl-	13.755	1.0229e+06	968348	1.00926e+06	231858	0	0	0	0	Liquid	Alkanes
Decane, 2,6,8-trimethyl-	13.771	4.70466e+06	5.34042e+06	4.64108e+06	1.90729e+06	0	0	0	0	Liquid	Alkanes
no hit13.99	13.99	0	0	0	0	2231375	2414502	2972149	1689807	SPME	Nohit
Nonanal	14.011	0	0	0	0	0	0	0	0	SPME	Aldehydes
Benzene, 1,3-diethenyl-	14.22	8155073	0	3725341	1662392	0	0	0	0	SPME	Aromatic
Undecane	14.243	0	0	0	0	360740	2.52518e+06	5.26681e+06	3.67955e+06	Liquid	Alkanes
no hit14.258	14.258	1.45984e+06	1.41117e+06	2.36007e+06	535273	0	0	0	0	Liquid	Nohit
1-Octanol, 2-methyl-	14.3	0	0	0	0	0	0	0	0	Liquid	Alcohols
Benzene, 1,2-dichloro-4-methyl-	14.39	41940374	27663857	6705614	19948707	0	0	0	0	SPME	Aromatic
Decane, 2,4-dimethyl-	14.399	0	0	0	0	0	0	0	0	Liquid	Alkanes
Decane, 3,6-dimethyl-	14.399	3.84142e+06	4.93897e+06	0	6.72249e+06	0	0	0	0	Liquid	Alkanes
Benzene, 1-pentenyl-	14.49	0	0	0	0	0	0	0	0	SPME	Aromatic
Decane, 2,4,6-trimethyl-	14.513	1.24387e+06	925671	0	2.3431e+06	3.05557e+06	0	3.25398e+06	198413	Liquid	Alkanes
Naphthalene, 1,2-dihydro-	14.52	4660042	13831928	3725341	11636746	0	0	0	0	SPME	Aromatic
Decane, 4-ethyl-	14.591	0	0	0	0	2.70532e+06	0	1.09389e+07	5.99875e+06	Liquid	Alkanes
Undecane, 4,8-dimethyl-	14.601	2.70001e+06	1.10893e+06	4.3393e+06	1.49465e+06	1.57345e+06	4.39253e+06	1.57345e+06	4.06473e+06	Liquid	Alkanes
Benzaldehyde, 2,4-dimethyl-	14.72	0	0	0	0	1.26163e+06	140181	4.76615e+06	5.46706e+06	Liquid	Aromatic
Benzene, 1-methyl-2-propyl-	14.731	1.02246e+06	0	3.95351e+06	1.77226e+06	0	0	0	0	Liquid	Aromatic
3-Methyl-1-(3-methyl-2-furyl)-2-buten-1-one	14.82	0	0	0	0	0	0	0	0	SPME	Others
(R,S)-5-Ethyl-6-methyl-3E-hepten-2-one	14.82	23300208	14984589	10430955	4987177	0	0	0	0	SPME	Ketones
2,6,6-Trimethyl-2-cyclohexene-1,4-dione	14.87	466004	115266	223520	748077	53755852	68235939	52309814	60833044	SPME	Ketones	1125-21-9	O829735	Macklin
Benzene, pentyl-	15.012	5825052	2881652	3874355	3158545	61159959	63826847	92374376	63367754	SPME	Aromatic	538-68-1	P831008	Macklin
2,6-Dimethyldecane	15.042	0	0	0	0	1.28641e+06	1.78119e+06	7.81744e+06	8.31222e+06	Liquid	Alkanes
6-[(Z)-1-Butenyl]-1,4-cycloheptadiene	15.096	60347539	102817334	30100757	36323271	29109301	13122296	30791459	24502198	SPME	Others
Undecane, 2,4-dimethyl-	15.208	2.97124e+06	0	2.07667e+06	2.23642e+06	0	0	0	0	Liquid	Alkanes
1,3,5,8-Undecatetraene	15.24	0	0	0	0	0	0	0	0	SPME	Alkenes
1,4-Cycloheptadiene, 6-(1-butenyl)-, [S-(Z)]-	15.25	0	0	0	0	0	0	0	0	SPME	Others
Benzene, 3-pentenyl-	15.31	31105778	52561328	16167981	49622409	4057045	6298702	3566578	6759227	SPME	Aromatic
5-Ethyldecane	15.317	0	0	0	0	0	0	0	0	Liquid	Alkanes
Undecane, 2-methyl-	15.317	1.85869e+06	5.71377e+06	6.05797e+06	5.57608e+06	6.55328e+06	1.19791e+06	6.76468e+06	3.24141e+06	Liquid	Alkanes
Dodecane	15.322	3.57446e+06	3.06383e+06	3.01276e+06	4.79999e+06	0	0	0	0	Liquid	Alkanes
Benzaldehyde, 3-ethyl-	15.34	69900624	146387909	61840665	86444397	7099829	3149351	7133156	4224517	SPME	Aromatic
1,4-Benzenedicarboxaldehyde	15.35	0	0	0	0	0	0	0	0	SPME	Aromatic
1H-Indene, 2,3-dihydro-1,6-dimethyl-	15.371	9320083	0	2980273	1662392	0	0	0	0	SPME	Aromatic
Undecane, 2,5-dimethyl-	15.379	608337	1.23082e+06	891285	947874	0	0	0	0	Liquid	Alkanes
Undecane, 3,6-dimethyl-	15.426	0	0	0	0	0	0	0	0	Liquid	Alkanes
no hit15.44	15.44	0	0	0	0	0	0	0	0	SPME	Nohit
6-Butyl-1,4-cycloheptadiene	15.49	147956321	150998552	116975715	165408029	0	0	0	0	SPME	Alkenes
Undecane, 2,3-dimethyl-	15.504	0	0	0	0	0	0	0	0	Liquid	Alkanes
Undecane, 3-methyl-	15.509	2.56311e+06	73231.7	3.62497e+06	0	0	0	0	0	Liquid	Alkanes
Pyrazine, 2-methoxy-3-(2-methylpropyl)-	15.58	54755489	62243678	25332320	26598276	0	0	0	0	SPME	Others
no hit15.608	15.608	1.22721e+07	1.55691e+07	1.75839e+07	1.50196e+07	0	0	0	0	Liquid	Nohit
Undecane, 3,7-dimethyl-	15.608	0	0	0	0	0	12564166	1.57052e+06	3.33736e+06	Liquid	Alkanes
Bicyclo[3.1.0]hex-3-en-2-one, 4-methyl-1-(1-methylethyl)-	15.62	349503	230532	149014	498718	16228182	14696971	13077453	2534710	SPME	Others
5-Pentylcyclohexa-1,3-diene	15.64	0	0	0	0	0	0	0	0	SPME	Terpenes
(3E,5Z)-1,3,5-Undecatriene	15.68	65939589	76306138	38371015	46962581	50915920	55323600	61226259	44188447	SPME	Alkenes
Benzaldehyde, 4-ethyl-	15.7	15145135	50717071	11176024	39066218	7.57161e+06	1.51432e+07	1.27996e+07	1.65854e+07	SPME+ Liquid	Aldehydes
no hit15.76	15.76	9902588	11872405	6407587	7563885	0	0	0	0	SPME	Nohit
(E,E)-1,3,5-Undecatriene	15.77	0	0	0	0	95340567	31493510	91542174	62522851	SPME	Alkenes
Naphthalene	15.838	699006	1498459	1043096	664957	21299488	20995673	47554376	42245169	SPME	Others	91-20-3	N814785	Macklin
Benzene, 1-methyl-4-(1-methyl-2-propenyl)-	15.86	0	0	0	0	0	0	0	0	SPME	Aromatic
7-Methyl-1,2,3,5,8,8a-hexahydronaphthalene	15.87	0	0	0	0	0	0	0	0	SPME	Terpenes
2-Decanone	15.91	58250520	47259089	35763276	48209375	98383351	128073608	141474269	116596668	SPME	Ketones	693-54-9	D836701	Macklin
1,2,4-Metheno-1H-indene, octahydro-1,7a-dimethyl-5-(1-methylethyl)-, [1S-(1alpha,2alpha,3abeta,4alpha,5alpha,7abeta,8S*)]-	15.91	149121331	150998552	39488617	56521337	0	0	0	0	SPME	Indenes
2-Methylisoborneol	15.923	45435406	48757548	13336722	26515156	93616323	153898287	147418566	106542317	SPME	Others	2371-42-8	M960269	Macklin
Benzene, (1-ethyl-2-propenyl)-	15.934	0	0	0	0	0	0	0	0	SPME	Aromatic
Bicyclo[3.3.0]octan-3-one, 7-ethylidene-	16.028	75609175	72502358	44108040	59430523	33673477	21520565	20210610	37175749	SPME	Ketones
1,3-Butadiene, 1,1,2,3,4,4-hexachloro	16.37	0	0	0	0	0	0	0	0	SPME	Others
Benzaldehyde, 4-(1-methylethyl)-	16.395	0	0	0	0	5172733	2624459	7133156	5914324	SPME	Aldehydes
no hit16.395	16.395	0	0	0	0	0	0	0	0	SPME	Nohit
Undecane, 3,8-dimethyl-	16.49	0	0	0	0	0	0	0	0	Liquid	Alkanes
Undecane, 4,6-dimethyl-	16.49	0	0	0	0	0	0	0	0	Liquid	Alkanes
1-Cyclohexene-1-carboxaldehyde, 2,6,6-trimethyl-	16.53	86210770	17289910	14156297	46546983	1014261	0	1188859	844903	SPME	Aldehydes
1H-Cyclopropa[a]naphthalene, 1a,2,3,5,6,7,7a,7b-octahydro-1,1,7,7a-tetramethyl-, [1aR-(1aalpha,7alpha,7aalpha,7balpha)]-	16.607	16310146	27663857	8195751	5818373	0	0	0	0	SPME	Terpenes
Benzene, 2-methoxy-4-methyl-1-(1-methylethyl)-	16.607	3.89636e+08	5.88809e+08	3.13187e+08	5.51271e+08	8.8159e+06	3.33575e+06	2.38268e+06	9.29244e+06	SPME+ Liquid	Aromatic
Octane, 2-iodo-	16.728	0	0	0	0	0	0	0	0	Liquid	Alkanes
no hit16.76	16.76	0	0	0	0	0	0	0	0	SPME	Nohit
alpha-Muurolene	16.91	92035822	42648446	14901365	61508513	0	0	0	0	SPME	Terpenes
Benzene, 1-(1,1-dimethylethyl)-4-methoxy-	16.91	0	0	0	0	0	0	0	0	SPME	Aromatic
2,5-Cyclohexadiene-1,4-dione, 2-methyl-5-(1-methylethyl)-	16.91	0	0	0	0	0	0	0	0	SPME	Others
no hit17.01	17.01	0	0	0	0	0	0	0	0	SPME	Nohit
Cyclohexane, 1,2-dimethyl-3,5-bis(1-methylethenyl)-	17.26	0	0	0	0	0	0	0	0	SPME	Others
Undecane, 3,4-dimethyl-	17.309	0	0	0	0	0	0	0	0	Liquid	Alkanes
Undecane, 3-ethyl-	17.543	0	0	0	0	418741	1.46559e+06	3.85241e+06	3.2243e+06	Liquid	Alkanes
2,3-Dimethyldodecane	17.548	0	0	0	0	1.569e+06	1.50452e+06	1.80542e+06	687780	Liquid	Alkanes
Dodecane, 3-methyl-	17.548	0	1.30295e+06	2.23364e+06	1.35614e+06	0	0	0	0	Liquid	Alkanes
Naphthalene, 2-methyl-	17.66	582505	691596	74507	664957	912835	629870	356658	422452	SPME	Aromatic
no hit17.68	17.68	0	0	0	0	0	0	0	0	SPME	Nohit
(3-Methylphenyl) methanol, 2-methylpropyl ether	17.71	0	0	0	0	0	0	0	0	SPME	Others
1H-Indene-4-carboxaldehyde, 2,3-dihydro-	17.77	0	0	0	0	0	0	0	0	SPME	Aromatic
2-Undecanone	17.99	582505	922129	298027	498718	7099829	3149351	2377719	3379614	SPME	Ketones	112-12-9	U820342	Macklin
1-Octanol, 2-butyl-	18.083	0	0	0	0	0	0	0	0	Liquid	Alkanes
no hit18.13	18.13	0	0	0	0	0	0	0	0	SPME	Nohit
no hit18.15	18.15	0	0	0	0	1724244	1784632	2258833	1436336	SPME	Nohit
Tridecane	18.3	1.49819e+06	2.03661e+06	2.10683e+06	0	0	0	0	0	Liquid	Alkanes
Dodecane, 2,6,11-trimethyl-	18.306	676418	0	466824	457297	6.32208e+06	932766	8.18761e+06	8.70581e+06	Liquid	Alkanes
Nonane, 2,2,4,4,6,8,8-heptamethyl-	18.575	0	0	0	0	0	37045.9	44455.1	0	Liquid	Alkanes
Tridecane, 3-methyl-	18.622	0	0	0	0	103030	682574	785604	334848	Liquid	Alkanes
no hit18.638	18.638	470275	2.86868e+06	4.23248e+06	3.62112e+06	0	0	0	0	Liquid	Nohit
Dodecane, 2,6,10-trimethyl-	18.933	0	0	0	0	4.35891e+06	1.29361e+07	5.90562e+06	2.10915e+06	Liquid	Alkanes
Dodecane, 4,6-dimethyl-	18.939	4.69609e+06	1.54392e+06	1.86557e+06	5.59672e+06	0	0	0	0	Liquid	Alkanes
Tricyclo[5.4.0.0(2,8)]undec-9-ene, 2,6,6,9-tetramethyl-, (1R,2S,7R,8R)-	19.038	88540790	448385012	26077389	113042673	0	0	0	0	SPME	Terpenes
no hit19.13	19.13	10019089	9912882	5588012	5901492	0	0	0	0	SPME	Nohit
no hit19.136	19.136	723561	1.32189e+06	0	208719	0	0	0	0	Liquid	Nohit
Hydroxycitronellal, trimethylsilyl ether	19.141	0	0	0	0	464196	2.19719e+06	897445	1.94962e+06	Liquid	Alkanes
Tridecane, 2-methyl-	19.188	3.04132e+06	3.23967e+06	2.80992e+06	1.52066e+06	2.27185e+06	2.72622e+06	5.71208e+06	3.57005e+06	Liquid	Alkanes
Tridecane, 5-methyl-	19.188	0	0	0	0	0	0	0	0	Liquid	Alkanes
no hit19.21	19.21	0	0	0	0	1622818	1679654	1664403	1013884	SPME	Nohit
Tridecane, 4-methyl-	19.291	0	0	0	0	0	0	0	0	Liquid	Alkanes
no hit19.54	19.54	0	0	0	0	0	0	0	0	SPME	Nohit
no hit19.63	19.63	44852900	48181217	35018208	39481816	0	0	0	0	SPME	Nohit
Copaene	19.727	25630229	388446656	250342931	398142944	0	0	0	0	SPME	Terpenes
no hit19.727	19.727	0	0	0	0	0	0	0	0	Liquid	Nohit
no hit19.85	19.85	0	0	0	0	2738506	3254329	3447692	2112258	SPME	Nohit
Decane, 1-iodo-	19.862	0	0	0	0	7.02321e+06	9.98035e+06	2.5875e+06	369643	Liquid	Alkanes
no hit19.862	19.862	7.43777e+06	4.58374e+06	3.6324e+06	864857	0	0	0	0	Liquid	Nohit
1-Tetradecene	19.94	58949526	44492703	45598177	19948707	6085568	8398269	3566578	3379614	SPME	Alkenes
Naphthalene, decahydro-4a-methyl-1-methylene-7-(1-methylethenyl)-, [4aR-(4aalpha,7alpha,8abeta)]-	20.11	27960250	29969178	10430955	28260668	0	0	0	0	SPME	Others
Tetradecane	20.11	274984	21152.6	719189	1.09994e+06	7.35399e+06	5.53317e+06	4.39665e+06	1.171e+06	SPME+ Liquid	Aromatic
no hit20.36	20.36	1.94484e+06	0	4.73245e+06	3.43589e+06	0	0	0	0	Liquid	Nohit
Caryophyllene	20.56	11650104	3457982	1490136	831196	0	0	0	0	SPME	Terpenes
no hit20.59	20.59	0	0	0	0	0	0	0	0	SPME	Nohit
2,6,10-Trimethyltridecane	20.635	151540	0	45462	878932	0	0	0	0	Liquid	Alkanes
Tetradecane, 5-methyl-	20.635	1.0008e+06	1.09611e+06	333599	1.33439e+06	1.1801e+06	280977	2.3883e+06	618149	Liquid	Alkanes
alpha-Ionone	20.68	81550728	26511196	14156297	24104688	0	0	0	0	SPME	Terpenes
Decahydro-1,1,4a,5,6-pentamethylnaphthalene	20.68	0	0	0	0	0	0	0	0	SPME	Terpenes
Benzene, 1,4-dimethoxy-2-methyl-5-isopropyl-	20.69	13980125	44953767	20861911	9974354	0	0	0	0	SPME	Aromatic
Aromandendrene	20.92	244652184	298539121	301752640	240215680	0	0	0	0	SPME	Others
Tetradecane, 4,11-dimethyl-	21.113	0	0	0	0	1.13035e+06	1.13035e+06	141294	447432	Liquid	Alkanes
Humulene	21.22	1980518	4380111	1415630	748077	25356534	22045457	23777188	32951232	SPME	Terpenes	6753-98-6	CM16686	Proteintech
2,5-Cyclohexadiene-1,4-dione, 2,6-bis(1,1-dimethylethyl)-	21.24	37280333	74922945	32783003	39066218	4969881	3359308	9510875	5745343	SPME	Ketones
Tetradecane, 4-methyl-	21.289	0	0	0	0	320319	594878	887742	411839	Liquid	Alkanes
(-)-Aristolene	21.312	1165010	23053214	8940819	7480765	0	0	0	0	SPME	Terpenes
Tetradecane, 2-methyl-	21.46	0	0	0	0	907358	2.5846e+06	439931	109983	Liquid	Alkanes
cis-Muurola-4(15),5-diene	21.54	47765426	41495785	20861911	11636746	0	0	0	0	SPME	Terpenes
Pentadecane	21.89	4776543	806862	1564643	332478	1.70032e+07	1.12324e+07	1.944e+07	1.02898e+07	SPME+ Liquid	Aromatic	629-62-9	P815577	Macklin
Tetradecane, 3-methyl-	21.964	1.24046e+06	985575	951589	815648	0	0	0	0	Liquid	Alkanes
no hit22.067	22.067	838225	21772.1	511644	174177	0	0	0	0	Liquid	Nohit
no hit22.33	22.33	0	0	0	0	608557	629870	832202	591432	SPME	Nohit
cis-Calamenene	22.36	181741622	126792677	35763276	146290518	0	0	0	0	SPME	Alkenes
Tridecane, 5-propyl-	22.529	363270	1.51913e+06	990737	2.54289e+06	4.4531e+06	4.09064e+06	2.12299e+06	4.03886e+06	Liquid	Alkanes
no hit22.534	22.534	0	0	0	0	0	0	0	0	Liquid	Nohit
Tetradecane, 2,6,10-trimethyl-	22.592	1.45108e+06	1.80285e+06	1.45108e+06	43972	0	0	0	0	Liquid	Alkanes
no hit22.695	22.695	774448	2.10822e+06	1.97914e+06	688398	0	0	0	0	Liquid	Nohit
Pentadecane, 6-methyl-	22.695	0	0	0	0	0	0	0	0	Liquid	Alkanes
Tetradecane, 4-ethyl-	22.783	0	0	0	0	304432	0	10872.6	1.07638e+06	Liquid	Alkanes
Pentadecane, 2-methyl-	22.939	3.20201e+06	0	0	4.17231e+06	832744	822710	672215	200661	Liquid	Alkanes
9-Dodecyn-1-ol	23.03	87375780	160219837	43959027	60677317	0	0	0	0	SPME	Alcohols
no hit23.142	23.142	0	0	0	0	3.72816e+06	6.10783e+06	1.4278e+06	2.61764e+06	Liquid	Nohit
Pentadecane, 4-methyl-	23.385	1.12909e+06	3.10501e+06	3.1991e+06	3.90478e+06	0	0	0	0	Liquid	Alkanes
Hexadecane	23.62	4.51923e+06	2.68896e+06	3.14415e+06	1.31234e+07	8.41321e+06	1.32122e+07	1.47917e+07	8.58049e+06	SPME+ Liquid	Aromatic
Pentadecane, 2,6,10-trimethyl-	23.961	2.24359e+06	2.16346e+06	3.76602e+06	120192	471268	1.4138e+06	0	211258	Liquid	Alkanes
Hexadecane, 7-methyl-	24.252	0	0	0	0	0	724624	504087	519839	Liquid	Alkanes
Dodecane, 4,9-dipropyl-	24.444	0	0	0	0	1.39717e+06	3.12699e+06	2.26208e+06	1.49696e+06	Liquid	Alkanes
Dodecane, 1-iodo-	24.568	0	0	0	0	0	0	0	0	Liquid	Alkanes
Hexadecane, 4-methyl-	24.672	0	0	0	0	0	0	0	0	Liquid	Alkanes
no hit24.937	24.937	0	0	0	0	0	0	0	0	Liquid	Nohit
Geosmin	25.027	36115322	17289910	12666160	29923061	105483180	192110412	301970289	137719252	SPME	Terpenes	16423-19-1	G769113	Macklin
3-Heptadecene, (Z)-	25.027	0	0	0	0	0	36742429	106997347	52384010	SPME	Alkenes
no hit25.03	25.03	27494245	26280664	14901365	19283750	0	0	0	0	SPME	Nohit
Pentadecane, 2,6,10,14-tetramethyl-	25.03	0	0	0	0	1.07073e+06	768732	2.44347e+06	2.11401e+06	Liquid	Alkanes
1-Heptadecene	25.034	0	0	0	0	0	0	0	0	SPME	Alkenes
Heptadecane	25.388	38445343	11411341	28312593	29091864	3.56603e+07	1.02514e+08	101713562	6.81783e+07	SPME+ Liquid	Aromatic
no hit25.938	25.938	1.6854e+06	4.16393e+06	3.7178e+06	2.0324e+06	0	0	0	0	Liquid	Nohit
Hexadecane, 2,6,10,14-tetramethyl-	25.975	0	3.58176e+06	1.74496e+06	3.6736e+06	369824	1.02413e+06	312928	2.50342e+06	Liquid	Alkanes
Hexadecane, 2,6,10-trimethyl-	26.042	3.42524e+06	2.62758e+06	4.12906e+06	563053	0	0	0	0	Liquid	Alkanes
Heptadecane, 2-methyl-	26.047	2.87968e+06	1.82097e+06	1.01636e+06	381134	0	0	0	0	Liquid	Alkanes
no hit26.141	26.141	0	0	0	0	0	0	0	0	Liquid	Nohit
Pentadecanoic acid, methyl ester	26.301	0	0	0	0	304126	779322	836345	836345	Liquid	Alkanes
E-7-Octadecene	26.6	0	0	0	0	0	0	0	0	SPME	Alkenes
Octadecane	26.763	0	0	0	0	858727	1.58534e+06	990839	2.15783e+06	Liquid	Alkanes
no hit26.95	26.95	75143171	63972669	48056902	56853815	90979243	90911266	92731034	58636295	SPME	Nohit
Octadecane, 2-methyl-	27.344	1.86988e+06	0	2.425e+06	2.68795e+06	3.72544e+06	7.94759e+06	7.07833e+06	3.84962e+06	Liquid	Alkanes
Nonadecane	27.635	0	0	0	0	7.52523e+06	2.42191e+06	2.94089e+06	778472	Liquid	Alkanes
Nonadecane, 9-methyl-	27.64	0	0	0	0	0	0	0	0	Liquid	Alkanes
Heptadecane, 2,6,10,15-tetramethyl-	27.718	0	0	0	0	0	0	0	0	Liquid	Alkanes
Nonadecane, 2-methyl-	27.858	2.50809e+06	2.7414e+06	495786	1.74983e+06	0	0	0	0	Liquid	Alkanes
10-Methylnonadecane	28.299	0	0	0	0	0	0	0	0	Liquid	Alkanes
Eicosane	28.299	0	2.14037e+06	3.60924e+06	167872	2.97154e+06	1.91912e+06	1.331e+06	897653	Liquid	Alkanes
Eicosane, 10-methyl-	28.813	0	0	0	0	2.07685e+06	2.48068e+06	2.48068e+06	2.79798e+06	Liquid	Alkanes
Docosane	29.98	0	0	0	0	1.06833e+06	0	2.03244e+06	1.06833e+06	Liquid	Alkanes

## Sheet: Table S4 Streptomyces VOCs
Table S4 VOC profiles of Streptomyces isolates and identification of shared key suppressive VOCs.
VOCs_names	Retention time(RT)	Stre2_1	Stre2_2	Stre2_3	Key_VOCs
Dimethyl sulfide	1.671	10612.2	0	0
2,3-Butanedione	2.022	0	0	419993
2,3-Pentanedione	3.203	0	0	67450.6
Carbonic acid, ethyl-, methyl ester	3.225	374406	0	126020
1-Butanol, 2-methyl-	4.043	0	22205.6	17352.5
Propanoic acid, 2-methyl-	4.55	0	0	27101.2
Toluene	5.25	0	10040.9	14129.8
3-Pentanol	5.479	0	0	19305
3-Penten-1-ol, (E)-	5.505	0	75473.7	0
2-Hexanol, 2-methyl-	5.515	0	20476	0
3-Heptene, 2,6-dimethyl-	6.162	0	47773.4	0
4-Methyl-2-pyrazolin-5-one	6.874	93961.1	0	0
Hexane, 1-methoxy-	7.166	0	69075.8	0
Styrene	7.701	14004.4	0	45963.3
n-Butyl ether	7.79	70159.2	0	45963.3
2,5-Dimethylpyrimidine	8.571	0	0	34479.7
4-Hexen-3-one, 5-methyl-	8.711	0	39917.6	0
1-Hexanol, 3-methyl-	8.851	0	33339.9	0
Dimethyl trisulfide	9.646	31982.3	0	0
2,4-Heptanedione	9.713	31670.4	0	0
Butanoic acid, butyl ester	10.298	0	0	36384.2
Propanal, propylhydrazone	10.984	21304.9	0	0
1-Hexanol, 2-ethyl-	11.122	548341	514780	0
Decane, 5-methyl-	11.728	0	0	16867.8
Pentanoic acid, 1,1-dimethylpropyl ester	11.75	0	0	10810.7
Benzofuran, 2-methyl-	12.479	0	0	17843.3
3,4-Hexanedione, 2,2,5-trimethyl-	12.71	19015.3	0	0
Butanedioic acid, methyl-, dimethyl ester	13.596	120034	0	0
Formic acid, 2-ethylhexyl ester	13.862	27484.6	0	18320.5
3,5-Heptanedione, 2,6-dimethyl-	14.008	0	180270	0
Benzaldehyde, 3-ethyl-	14.206	0	0	11889.8	Shared_with_suppressive_soil
Octanoic acid	14.393	0	0	20109.6
2-Methylisoborneol	14.637	118121	1.94733e+06	0	Key_VOCs
Undecane, 4,7-dimethyl-	14.888	0	0	102243
7-Octen-1-ol, 3,7-dimethyl-, (S)-	15.243	0	11288	0
1-Methyl-2-methylene-trans-decalin	15.565	152023	55038.6	0
Benzeneacetonitrile, .alpha.-methyl-	15.723	0	89029.1	0
Hexanedioic acid, dimethyl ester	15.856	25315.2	0	0
2-Undecanone	16.845	0	0	17178.4	Key_VOCs
Undecane, 4,8-dimethyl-	16.93	42818.3	42330.1	64294	Shared_with_suppressive_soil
Naphthalene, 2-methyl-	16.96	0	21477.2	0	Shared_with_suppressive_soil
Undecanal	17.111	0	36877.5	0
2-Undecene, 7-methyl-	17.715	0	15269.7	0
Tridecane, 5-methyl-	18.842	0	0	374677
Geosmin	19.12	1.77641e+06	400915	0	Key_VOCs
Caryophyllene	19.393	50884.7	77933.8	0
(-)-delta.-Panasinsine	19.395	0	0	58427.5
4-Methoxy-1-methylindole	19.811	10298.2	0	0
Humulene	20.018	45482	73073.4	50500.9	Key_VOCs
Tetradecane	20.64	0	317450	375250	Shared_with_suppressive_soil
Bicyclosesquiphellandrene	21.203	10061.9	0	0
trans-Calamenene	21.224	17255.5	12808.2	0
Decane, 2,3,7-trimethyl-	21.449	0	16386.7	0
Caryophyllene oxide	22.313	16600.7	0	0
Dodecanoic acid	22.806	0	0	11955
Tridecanoic acid	24.513	0	0	108794
Tetradecanoic acid	25.855	24090.9	0	31982.2
Homosalate	26.476	0	29787.8	17400.2
Heneicosane	28.993	0	148898	0
