# Supplementary material for: Microbiome and volatile organic compound profiling of diseased soils and their association with tomato wilt caused by Ralstonia solanacearum
Source: Research Square preprint supplement (doi:10.21203/rs.3.rs-8281057/v1), 2025-12-10
Supplement: Supplementary file 2 [file eac87c3165163fdb7f375c0d.docx]

**Microbiome and volatile organic compound profiling of diseased soils and their association with tomato wilt caused by *Ralstonia solanacearum***

Yishuo Huang1†, Jinlong Zhang1†, Gaofei Jiang1, Xiaofang Wang1, Zhong Wei1*, Waseem Raza2*

1Jiangsu Provincial Key Lab for Organic Solid Waste Utilization, National Engineering Research Center for Organic-based Fertilizers, Jiangsu Collaborative Innovation Center for Solid Organic Waste Resource Utilization, Nanjing Agricultural University, Binjiang Avenue 666, Jiangbei New District, Nanjing, 211800, Jiangsu Province, PR China

2National Key Laboratory for Tropical Crop Breeding, Sanya Research Institute, Institute of Tropical Bioscience and Biotechnology, Chinese Academy of Tropical Agricultural Sciences, Haikou, 571101, China

†Yishuo Huang and Jinlong Zhang have contributed equally to this work.

*Corresponding authors

Zhong Wei

Email: weizhong@njau.edu.cn

Waseem Raza

Email: waseem@catasitbb.cn

**Supplementary Figures**

**
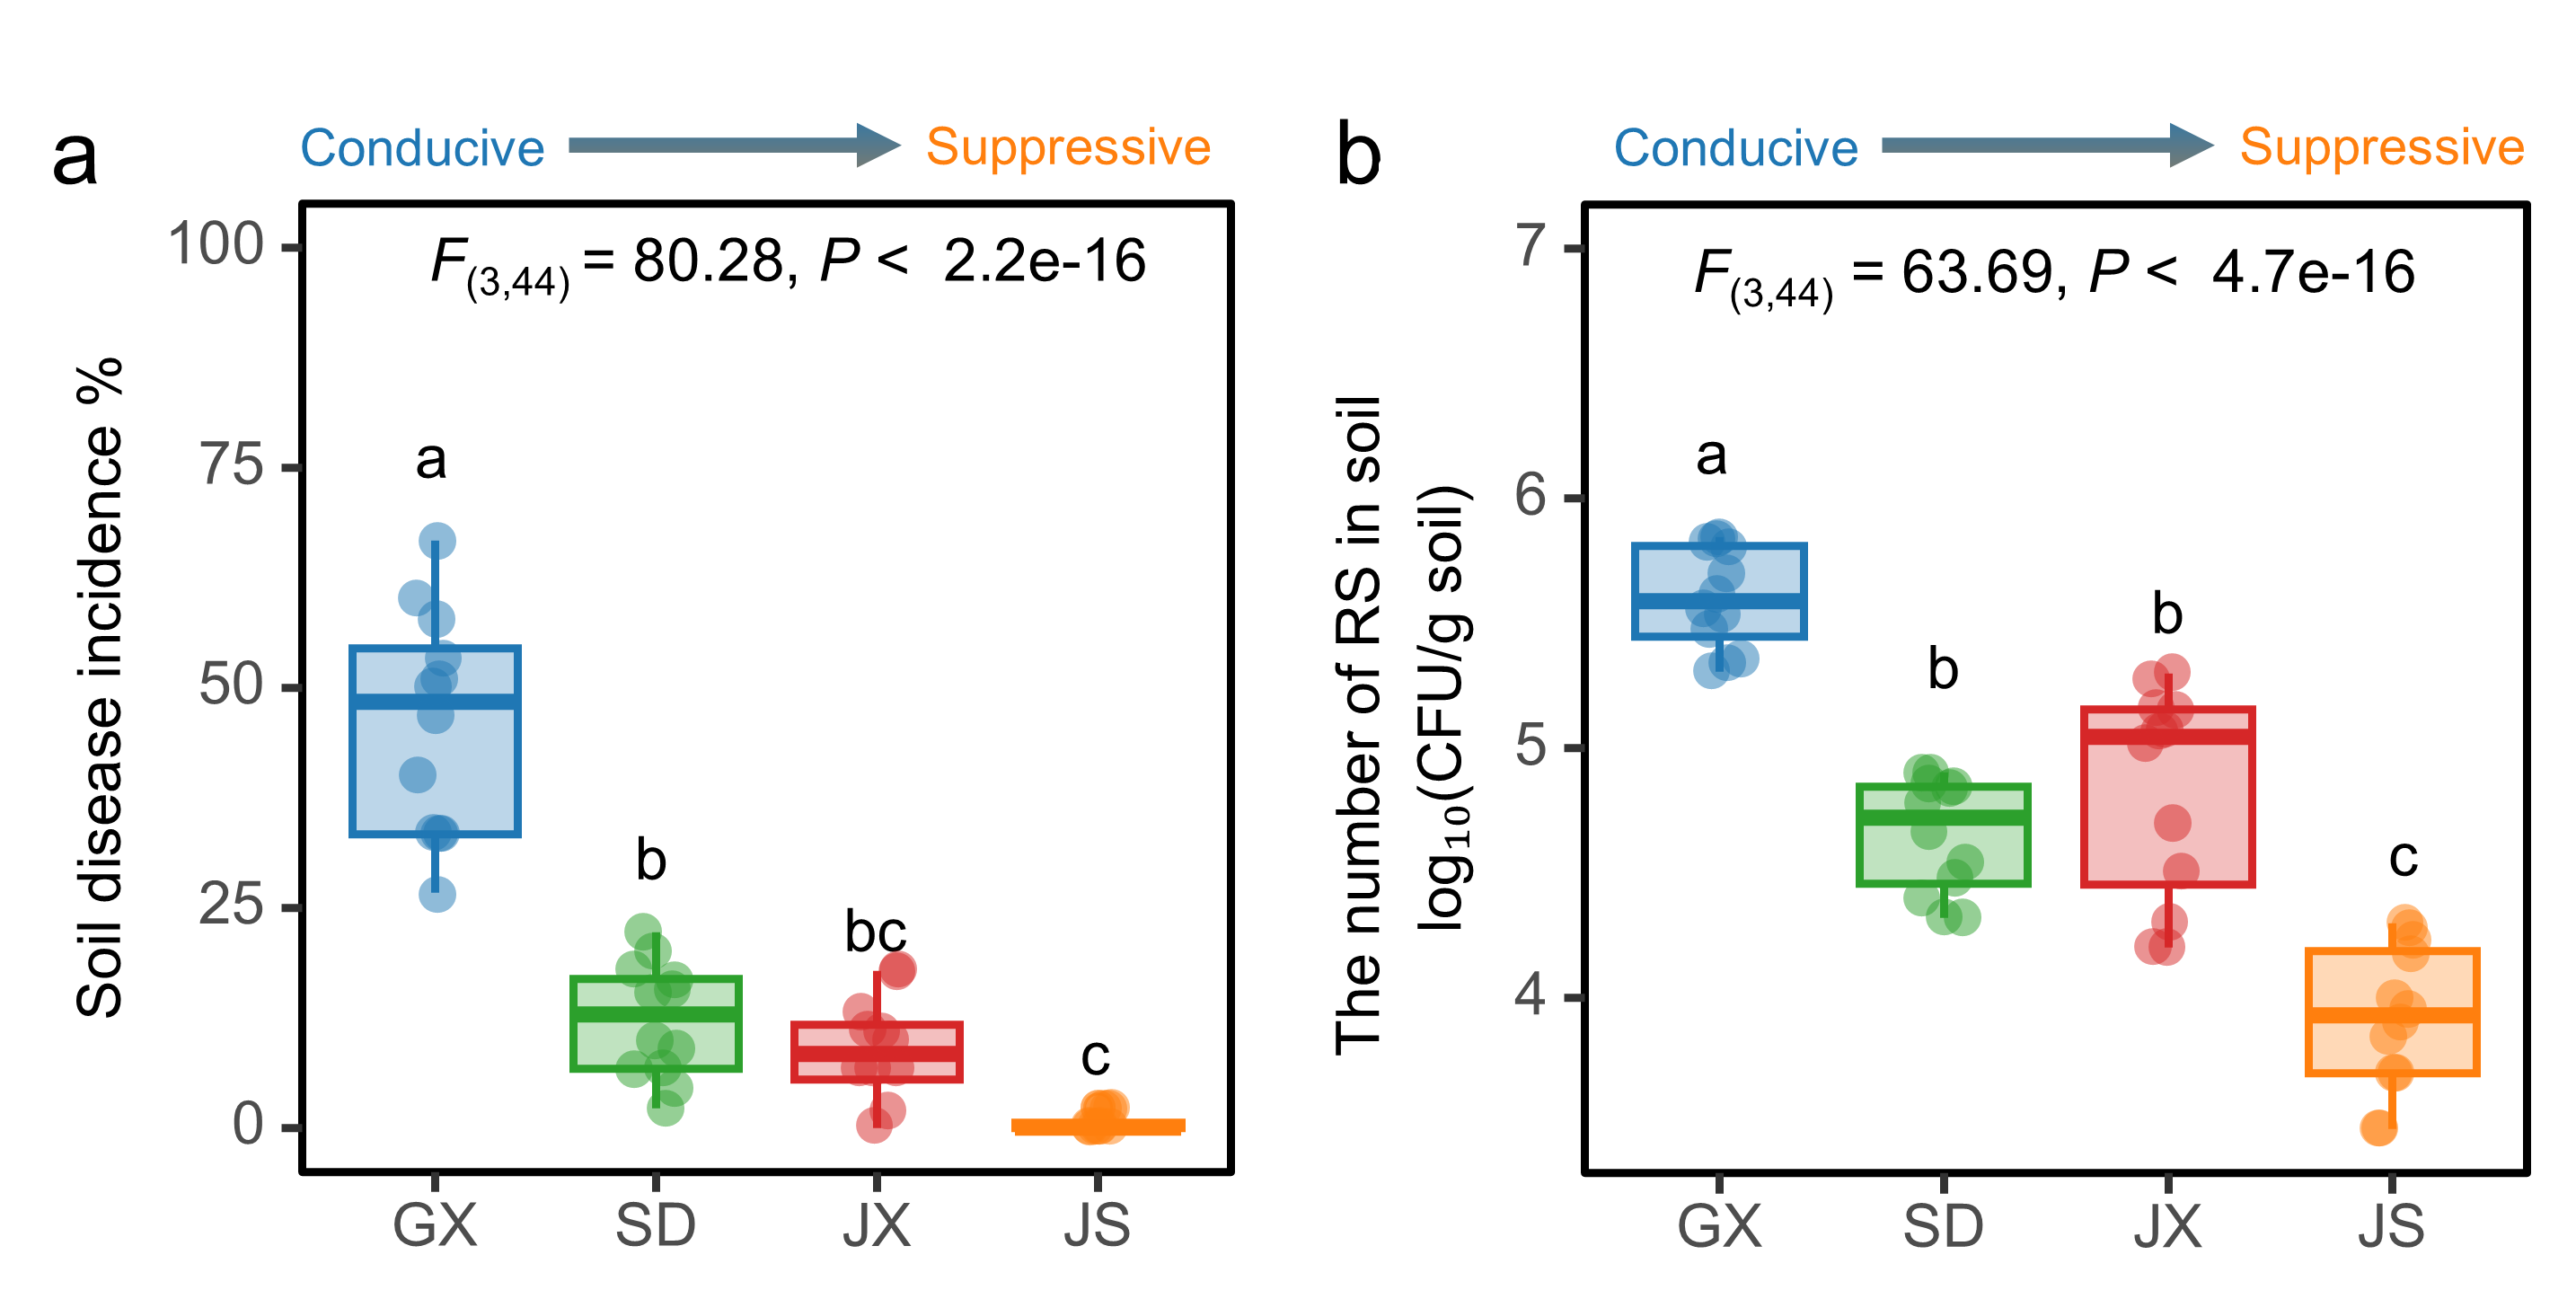
**

Fig. S1 Incidence of bacterial wilt disease in tomato plants (**a**) and the numbers of *Ralstonia solanacearum* in soils from the four regions (**b**). Statistical analysis was performed using one-way ANOVA followed by Tukey’s HSD test (N = 12). The four regions used to collect soil samples are Guangxi (GX), Jiangsu (JS), Jiangxi (JX), and Shandong (SD).

**
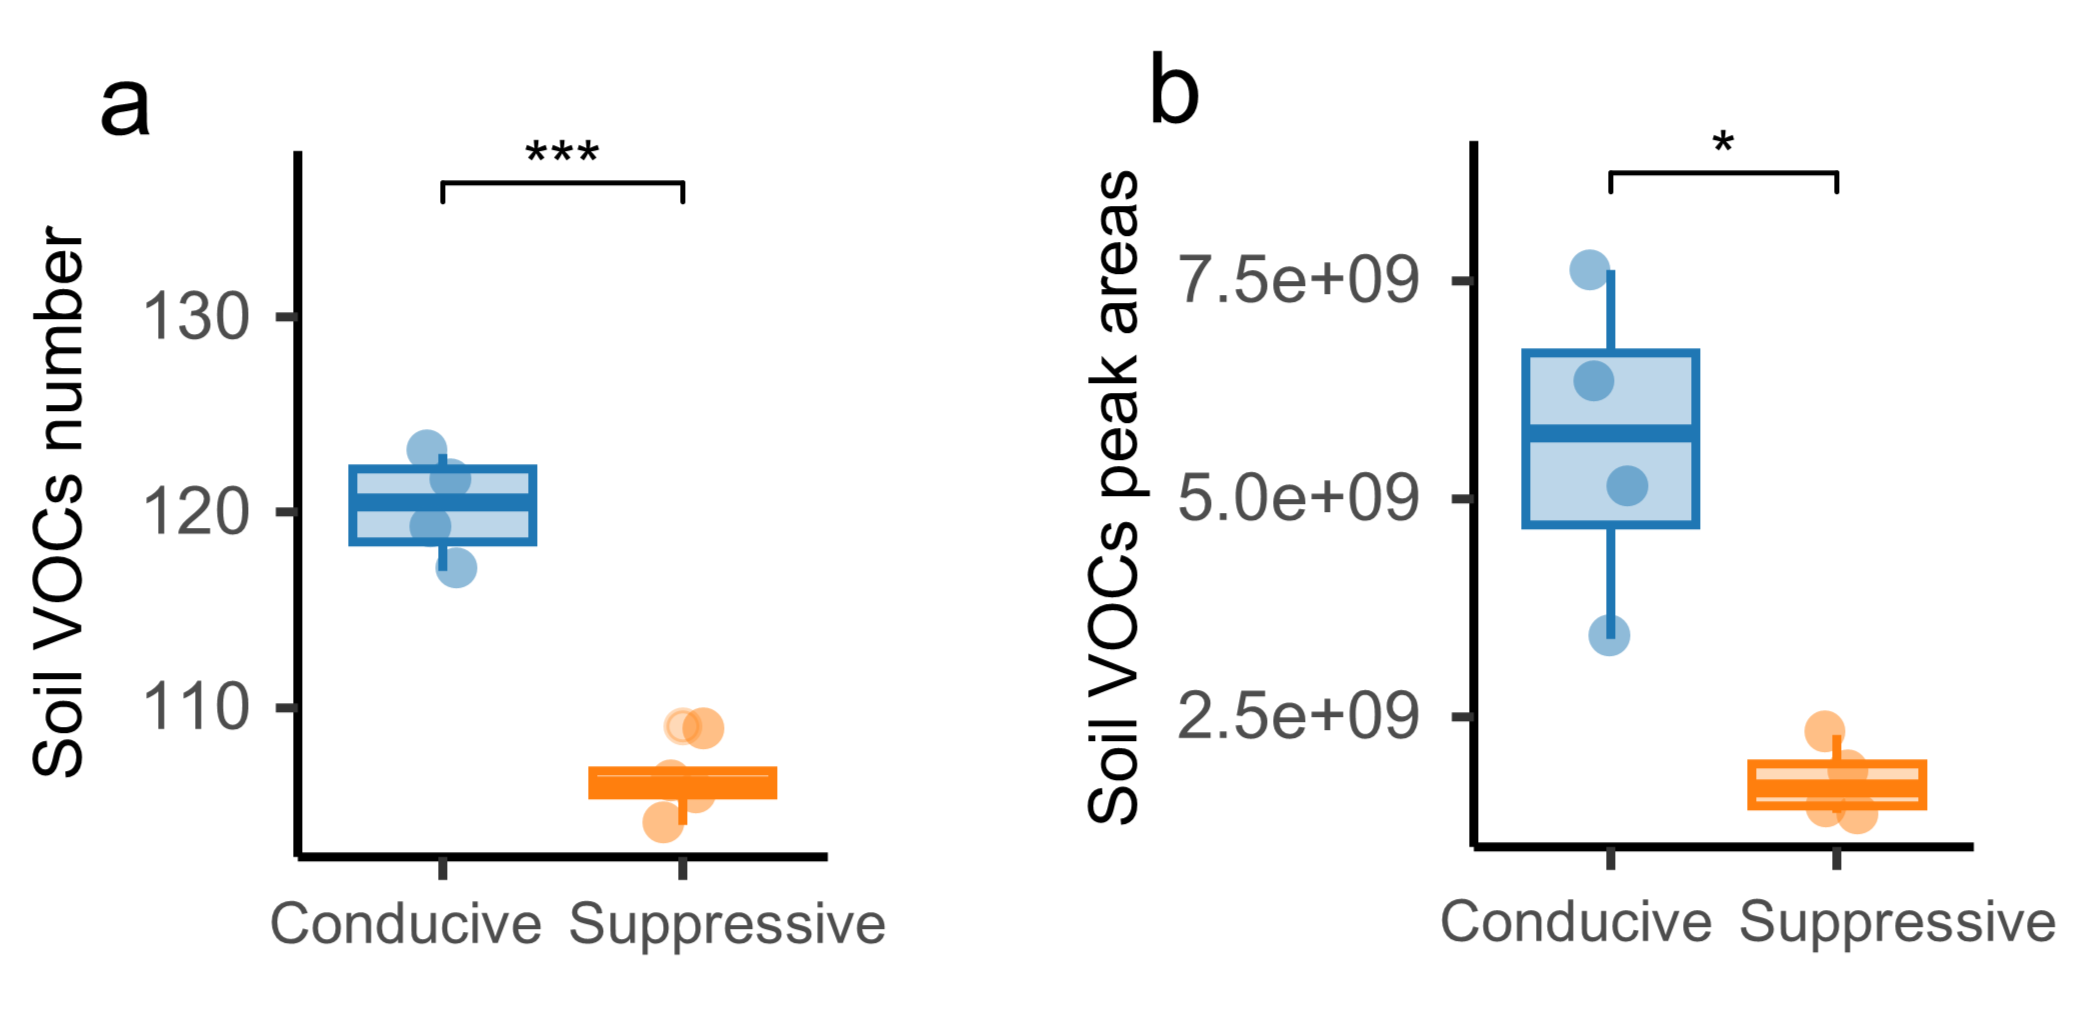
**

Fig. S2 Number of volatile organic compounds (VOCs) (**a**) and their peak areas (**b**) in conductive and suppressive soils (two-sided Student’s t-test; N = 4). The significance levels are indicated by asterisks: *P<*0.05 is " * ", and *P<*0.001 is " *** ".

**
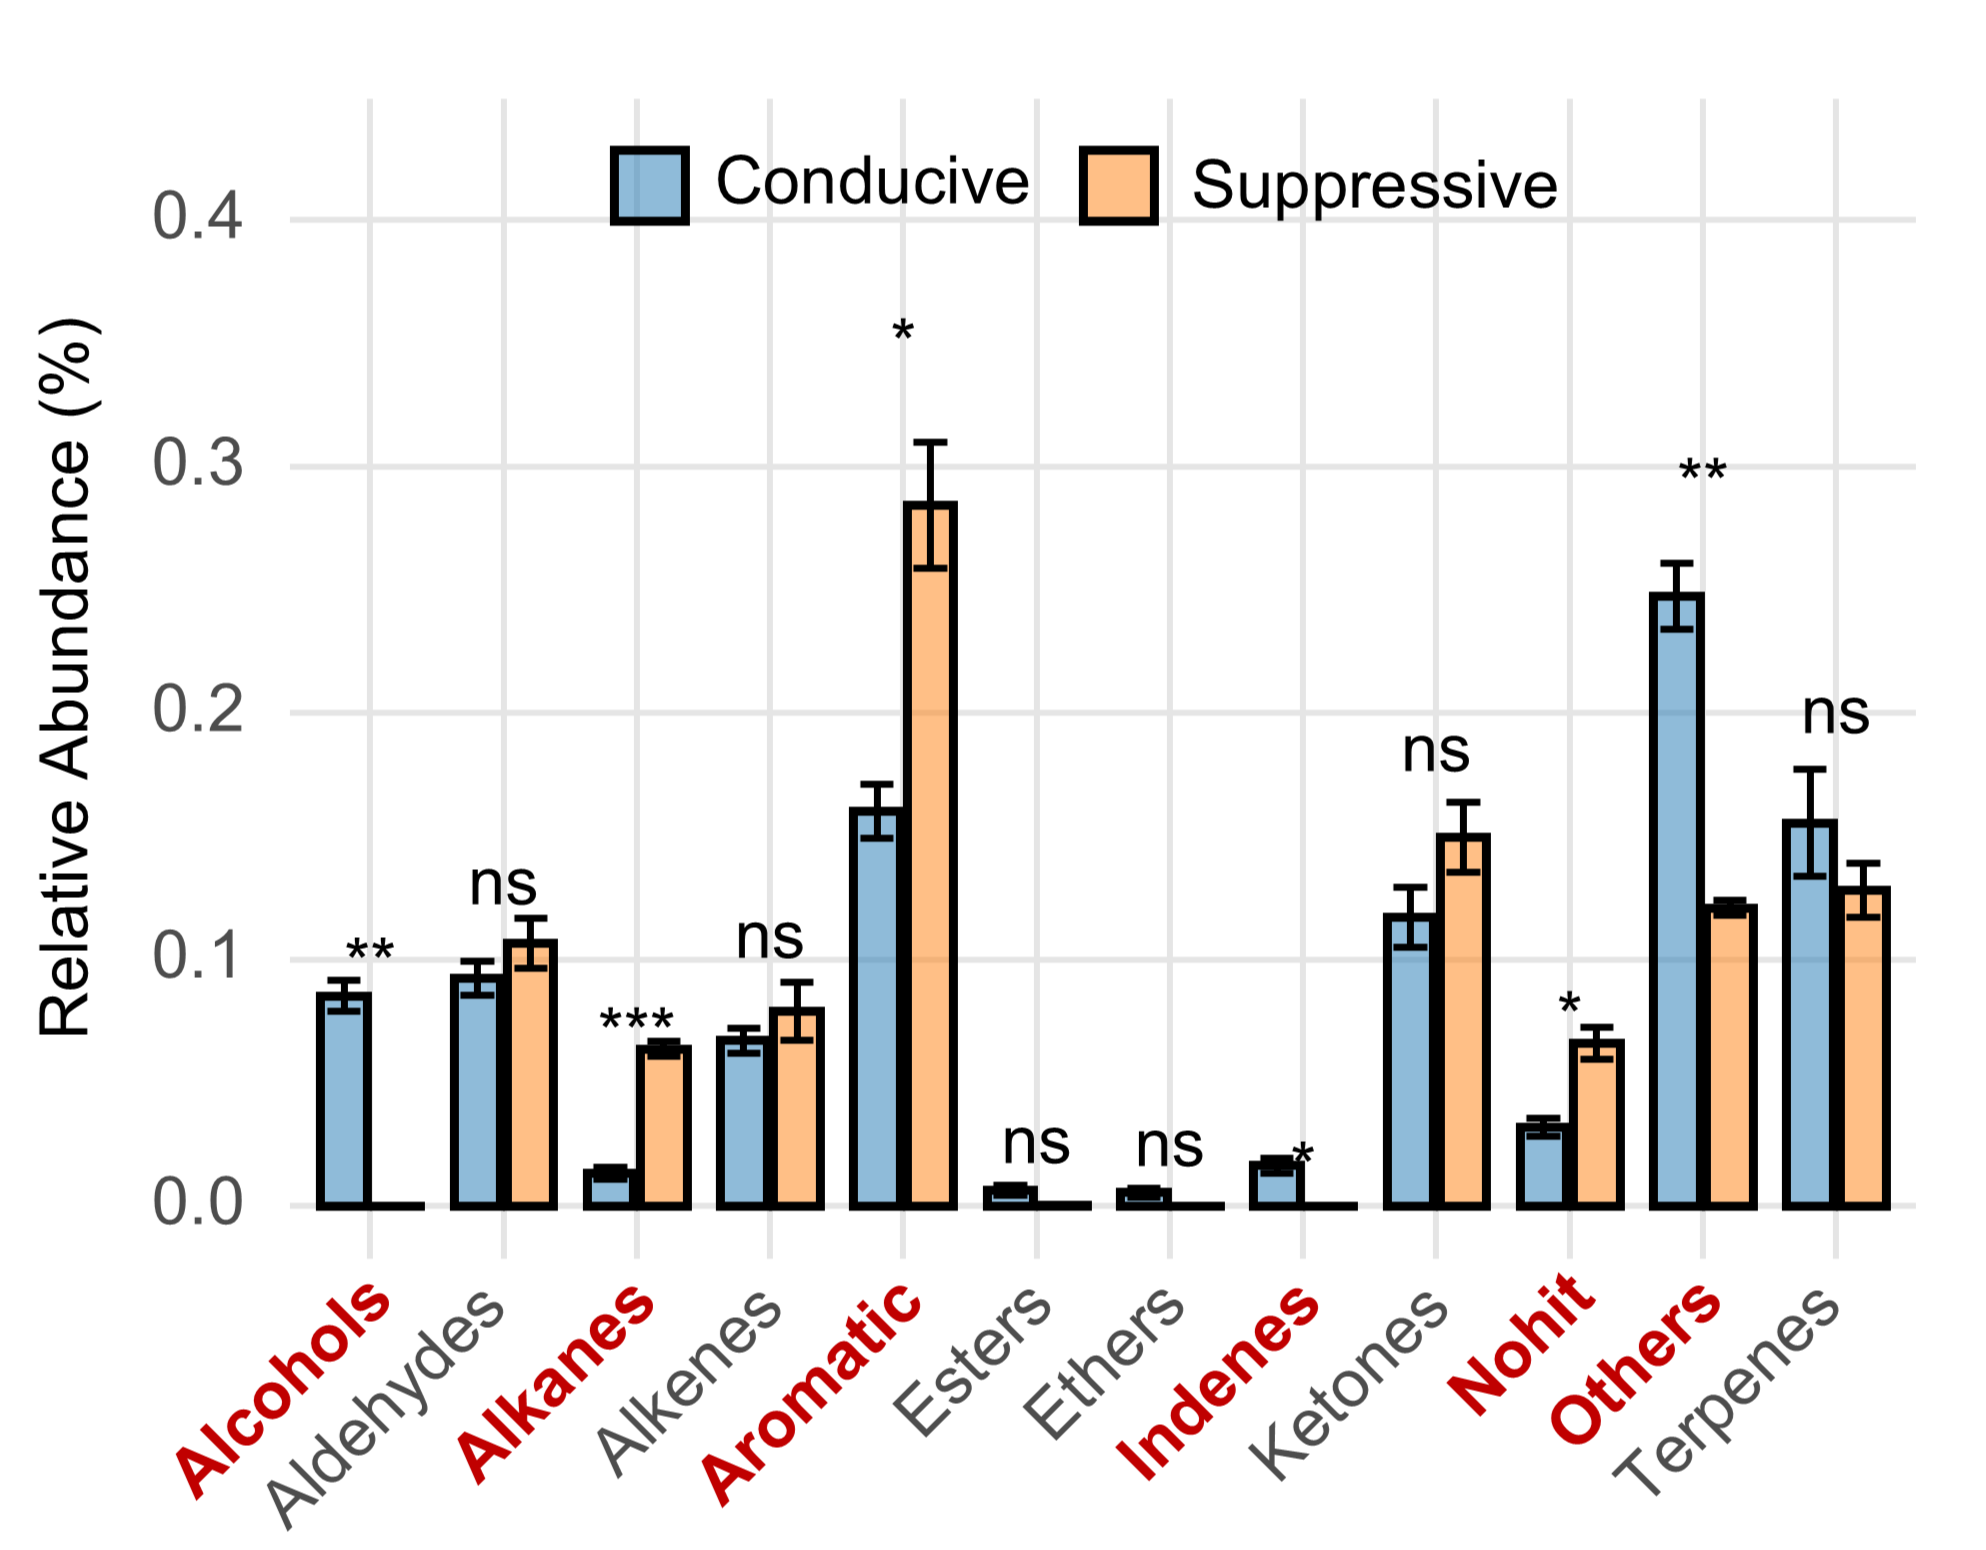
**

Fig. S3 The relative abundance of volatile organic compounds (VOCs) at the chemical class level in conductive and suppressive soils (two-sided Student’s t-test; N = 4). Asterisks indicate the significance levels: *P<*0.05 is " * ", *P<*0.01 is “** ", and *P<*0.001 is " *** ".

**
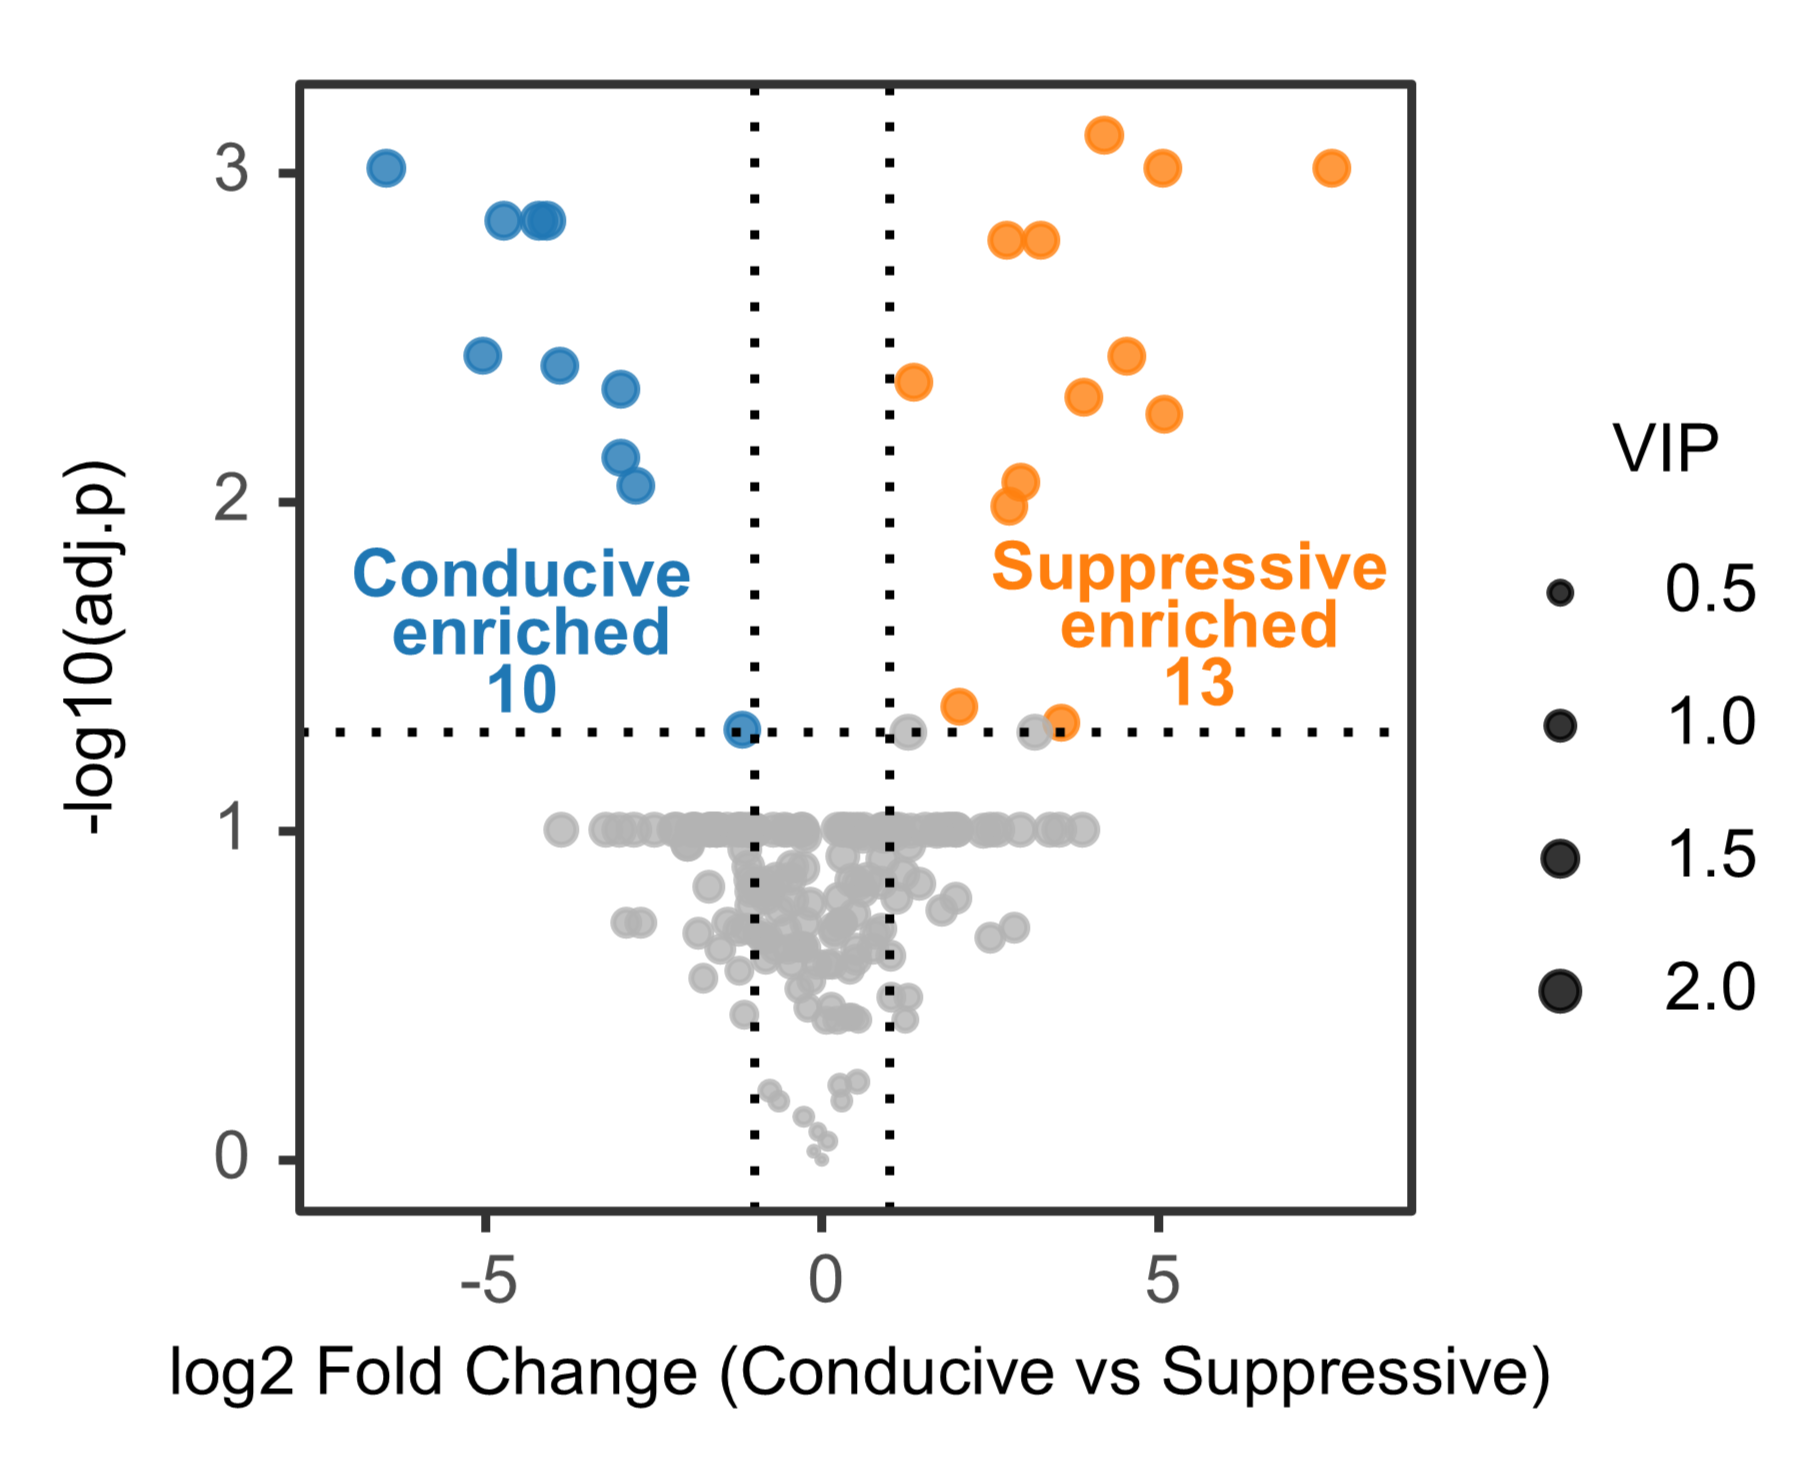
**

Fig. S4. The volcano plot displays the DESeq2 analysis of volatile organic compounds (VOCs) from conducive and suppressive soils, combined with VIP values. VOCs enriched in suppressive soil are represented in yellow with log2FC > 1 and *Padj* < 0.05, while VOCs enriched in conducive soil are represented in blue with log2FC < -1 and *Padj* < 0.05. Additionally, the size of the points in the plot corresponds to the VIP value.

**
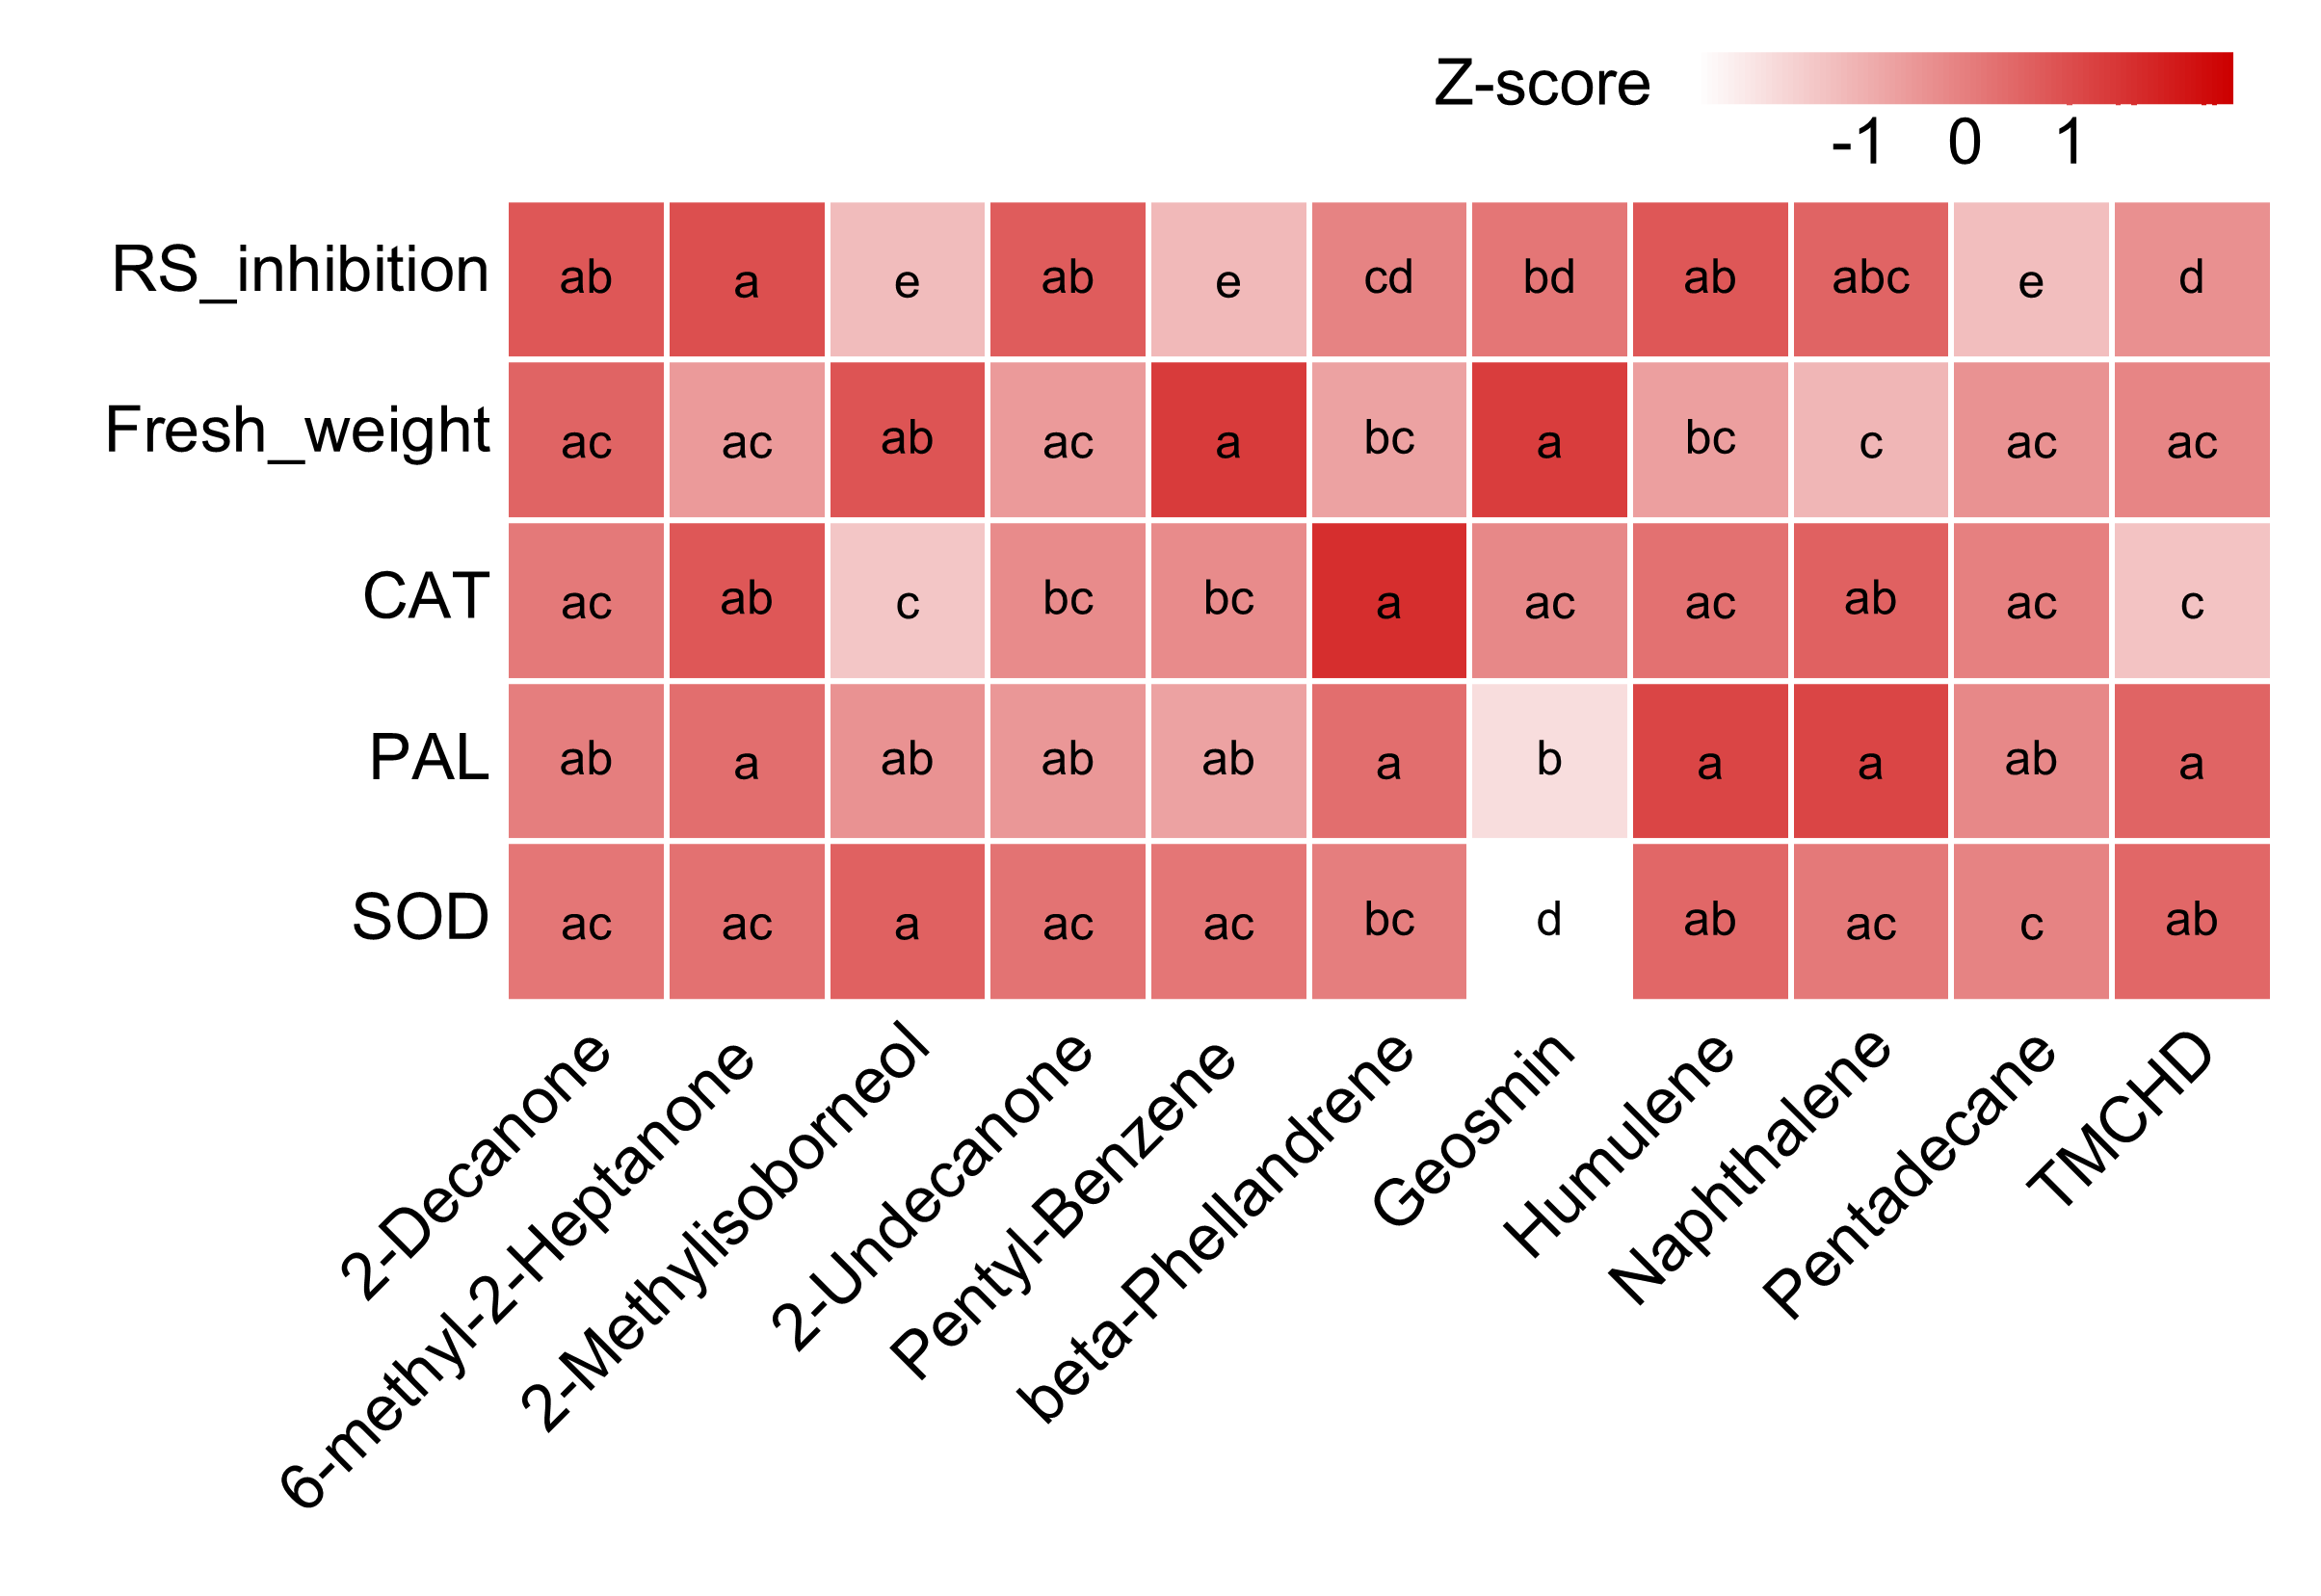
**

**Fig. S5.** Heatmap showing the standardized effects of key volatile organic compounds (VOCs)-enriched in disease-suppressive soil on the growth of Ralstonia solanacearum, *Solanum lycopersicum* plant fresh weight, and the activities of defense enzymes, including catalase (CAT), phenylalanine ammonia-lyase (PAL), and superoxide dismutase (SOD). Data represent relative changes compared with the blank DMSO control, followed by z-score normalization across compounds. Darker red indicates stronger positive deviations from the control. Different letters denote significant differences according to one-way ANOVA followed by Tukey’s HSD test (*p = 0.05*). The full name of TMCHD is 2,6,6-Trimethyl-2-cyclohexene-1,4-dione.

**
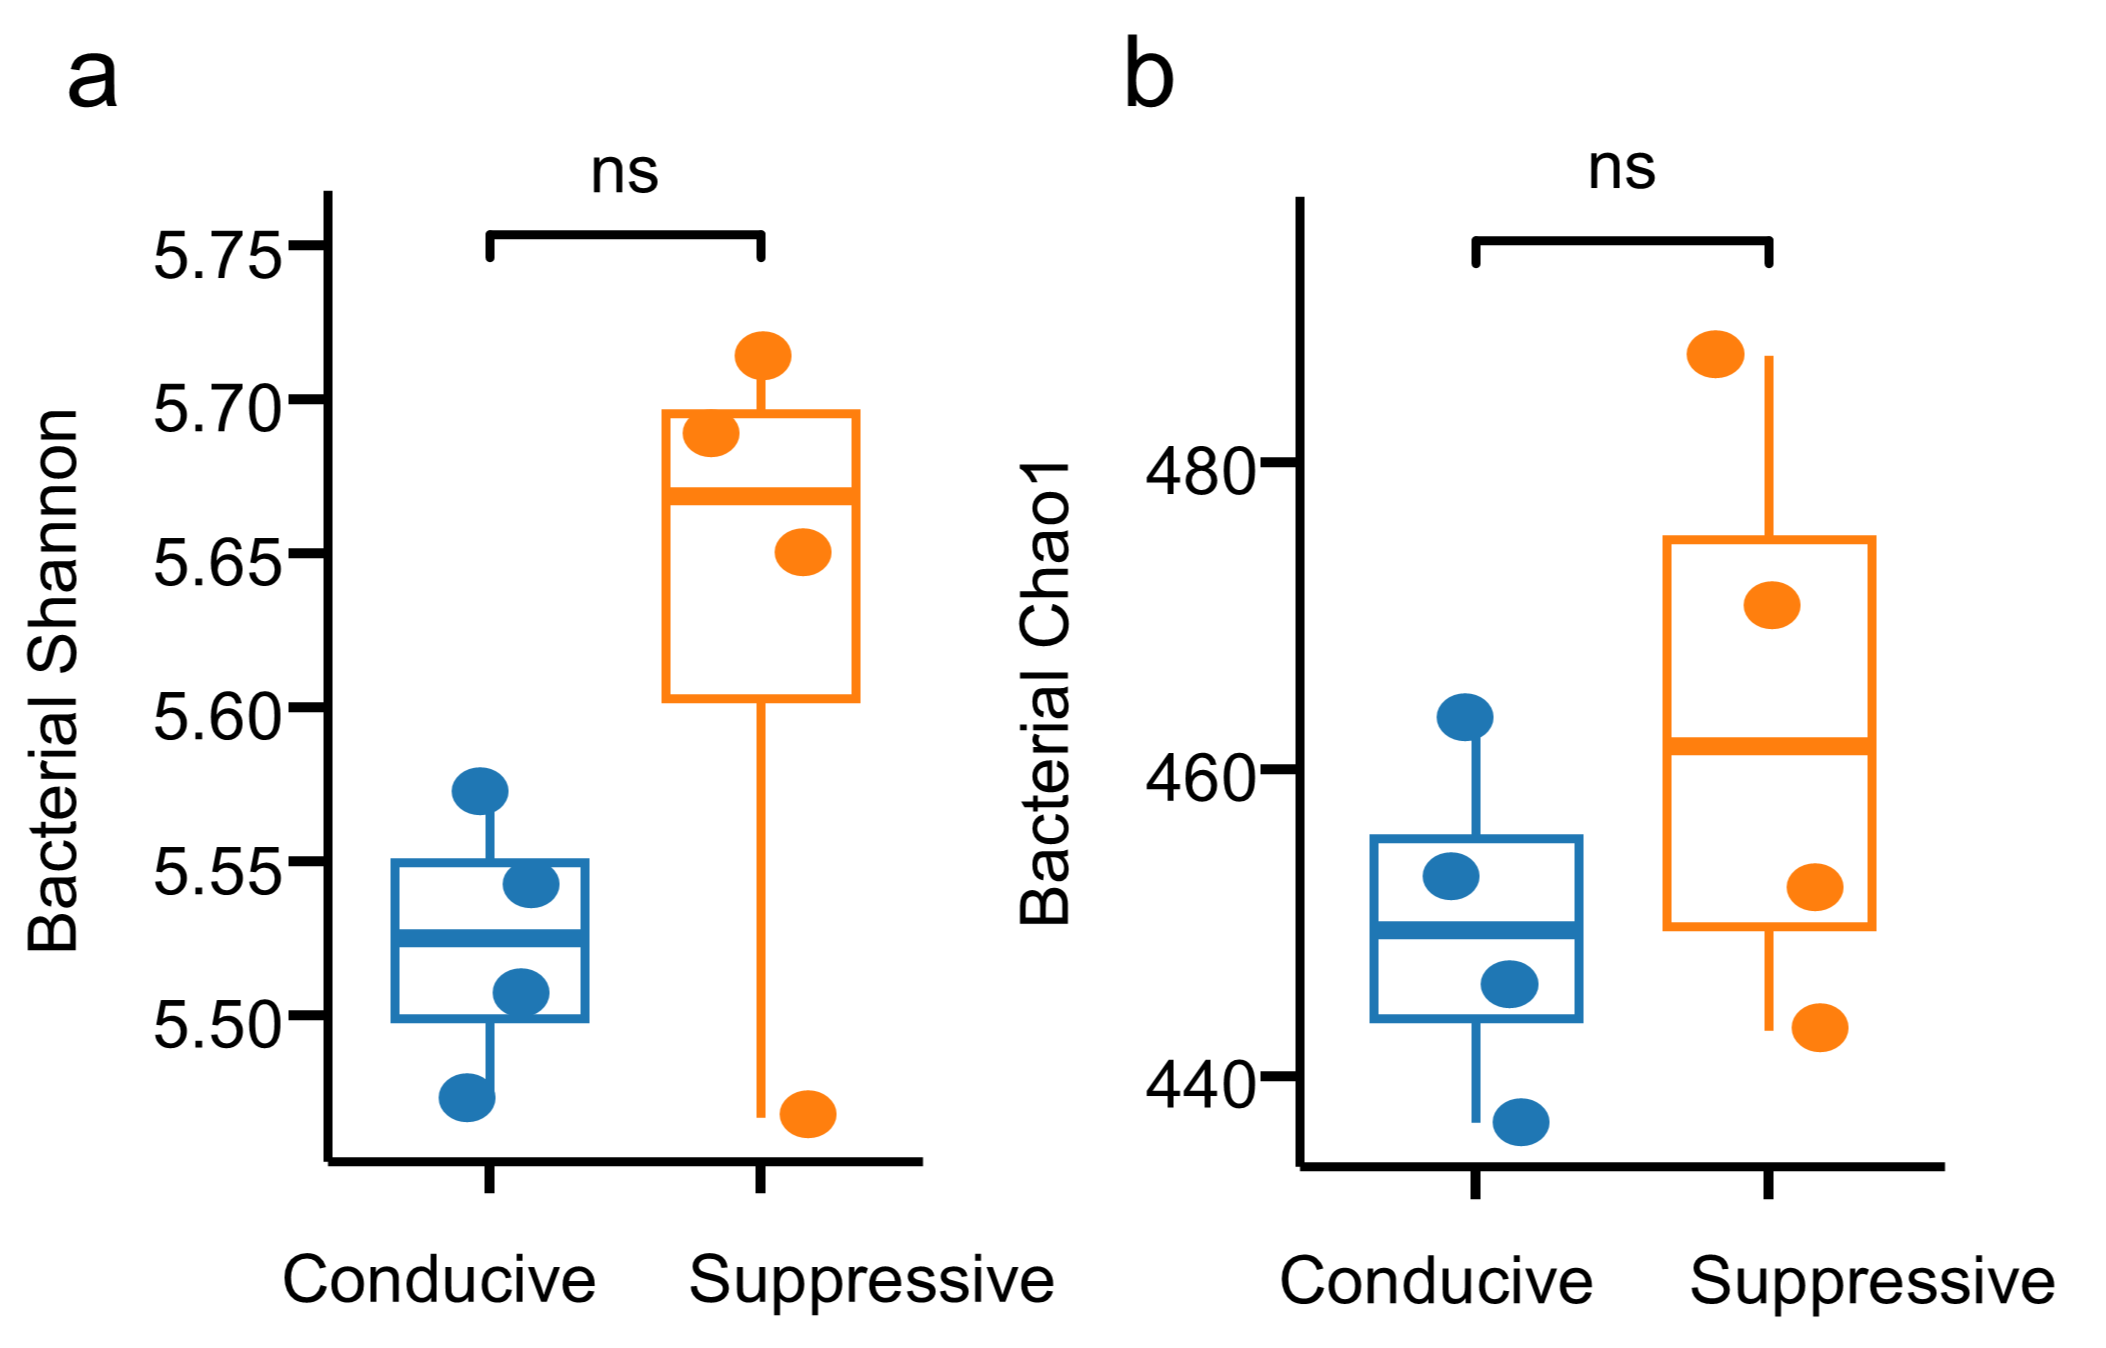
**

**
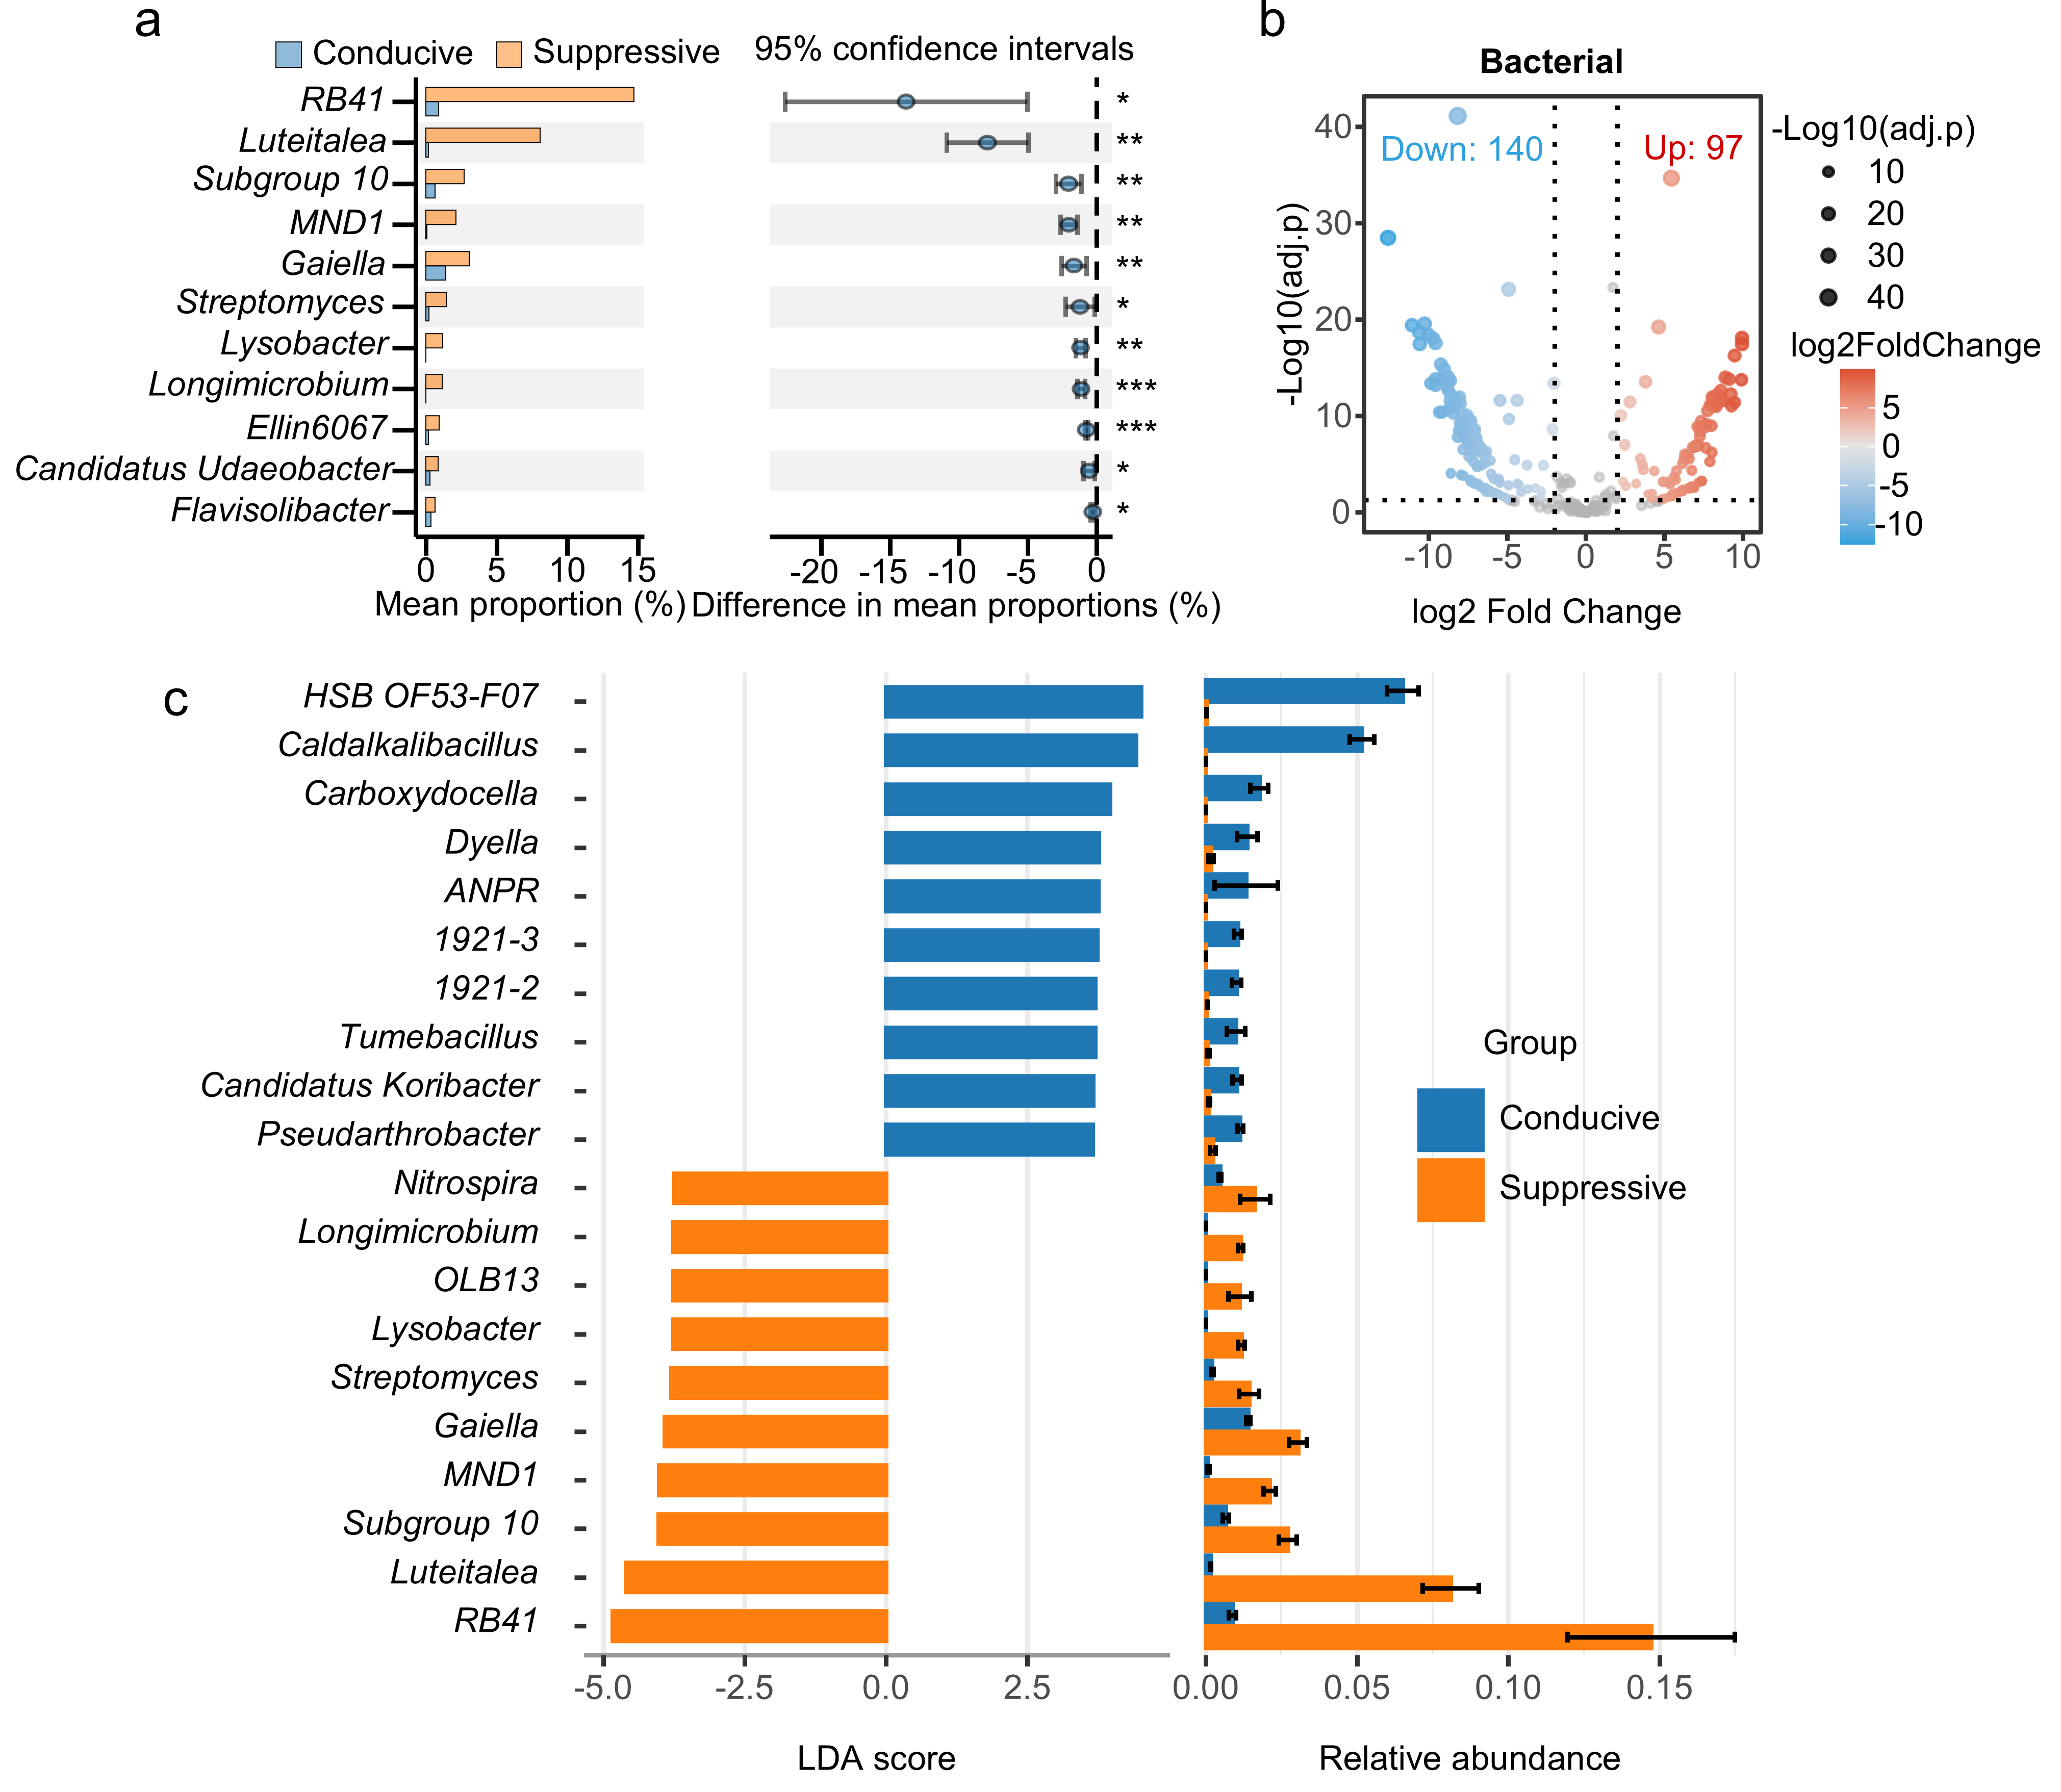
**Fig. S6. Alpha-diversity of bacterial microbiome in conductive and suppressive soils. (**a**) Shannon index and (**b**) Chao1 index of bacterial community at the ASVs level with premanova testing (two-sided Student’s t-test; N = 4). ns denotes nonsignificant.

Fig. S7. Multiple approaches to analyzing microbiome differences between conductive and suppressive soils. (**a**) Enrichment of 11 differential bacterial genera in suppressive soil based on STAMP analysis (Relative abundance > 0.5%, and *P* < 0.05). (**b**) Volcano plots of bacterial genus-level abundance differences in conducive and suppressive soils, where log2FC absolute values >2 and *P*adj < 0.05 are considered as potential soil microorganisms that release disease-suppressive VOCs. (**c**) Microbial differences between the two types of soils based on LEfSe analysis, showing the top 20 genera by LDA score. The left side indicates the LDA values, and the right side shows the relative abundance of microorganisms in the two types of soils. The full name of ANPR is Allorhizobium-Neorhizobium-Pararhizobium-Rhizobium. Asterisks indicate the significance levels: *P<*0.05 is " * ", *P<*0.01 is “** ", and *P<*0.001 is " *** ".


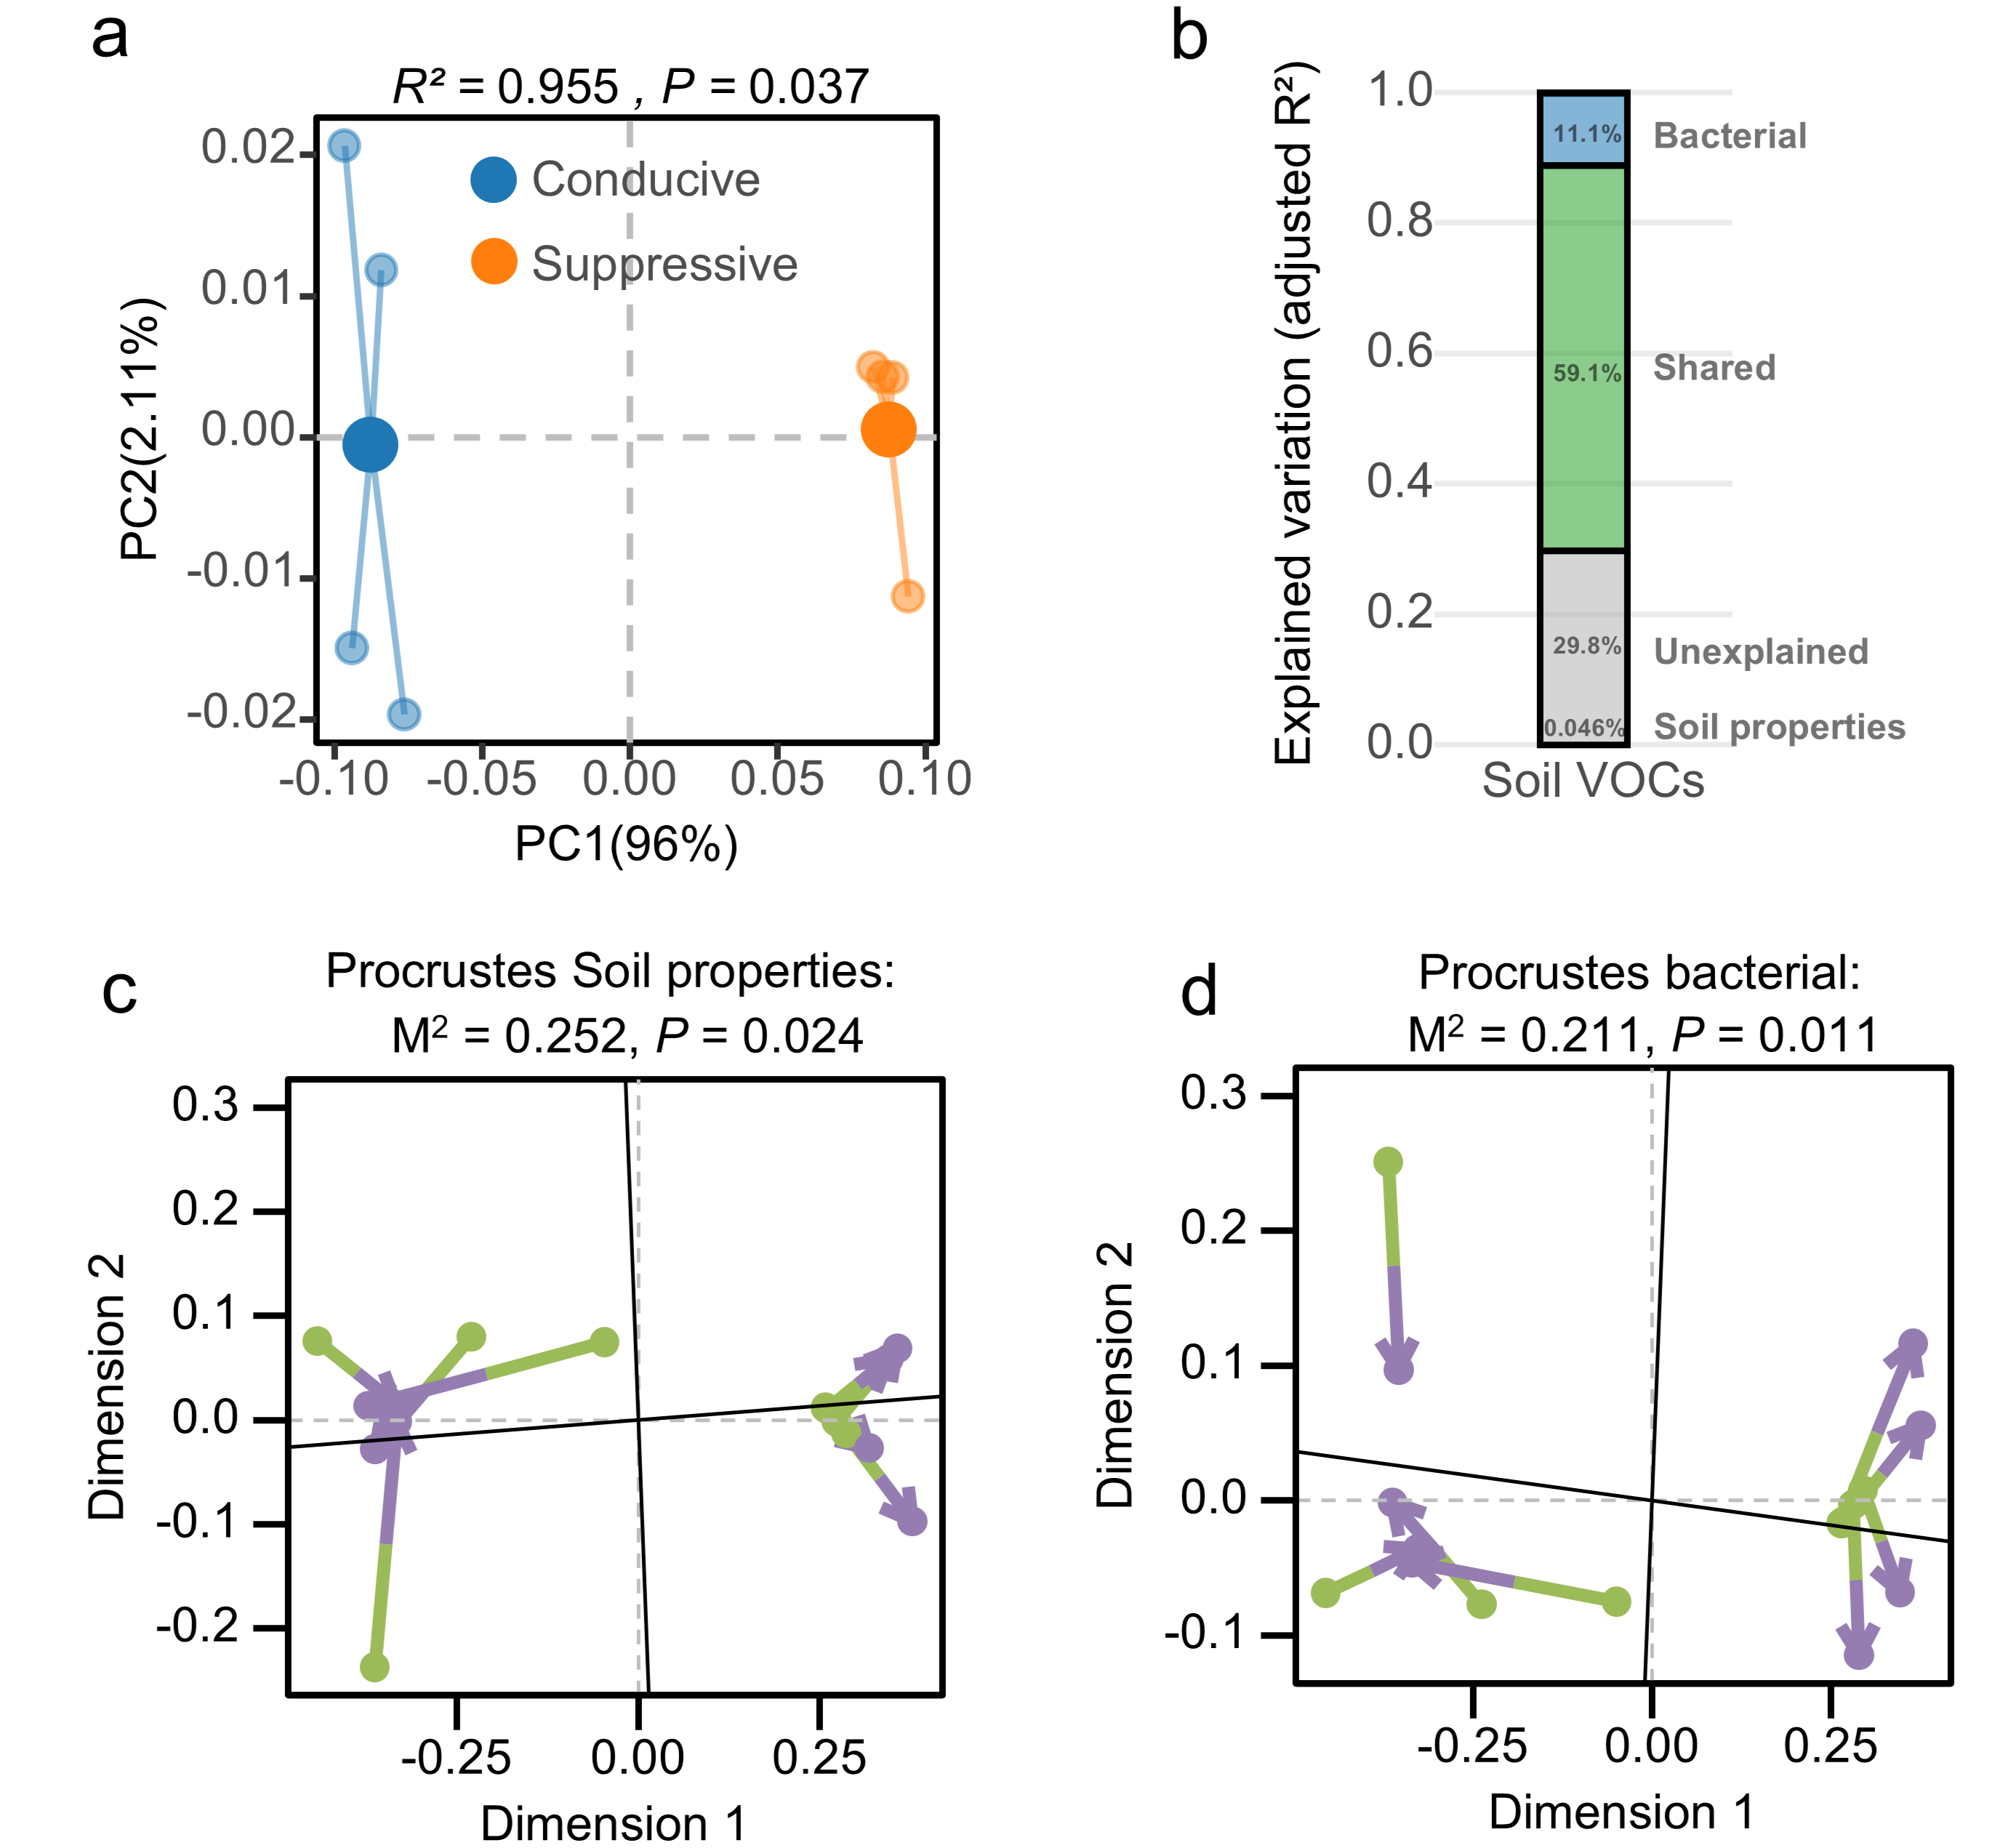


Fig. S8 Composition and variance partitioning analysis of soil VOCs. (**a**) Principal coordinate analysis (PCoA) based on VOC composition showing a clear separation between suppressive and conducive soils. (**b**) Variation partitioning analysis (VPA) showing the proportion of variance in VOC composition explained by soil physicochemical properties and bacterial communities. Values represent adjusted R² fractions. Shared, unique, and unexplained portions correspond to the joint, independent, and residual contributions, respectively. (**c**) soil physicochemical properties and (**d**) bacterial communities. Arrows connect corresponding samples in the two ordination spaces; shorter arrows indicate higher similarity. The M² statistic and permutation *p*-values denote the degree of matching between the datasets.
